# Supplementary material for: Agreement between rhinomanometry and computed tomography-based computational fluid dynamics
Source: Int J Comput Assist Radiol Surg. 2021 Mar 7;16(4):629–38. doi: 10.1007/s11548-021-02332-1 (PMC8052237; doi:10.1007/s11548-021-02332-1)
Supplement: Supplementary file 1 — Supplementary file1 (XLSX 1051 KB) [file 11548_2021_2332_MOESM1_ESM.xlsx]

## Sheet: Raw Data
V1_left_abgeschwollen	P1_left_abgeschwollen	V1_left_geschwollen	P1_left_geschwollen	V1_left_simulated	P1_left_simulated	V1_right_abgeschwollen	P1_right_abgeschwollen	V1_right_geschwollen	P1_right_geschwollen	V1_right_simulated	P1_right_simulated	V2_left_abgeschwollen	P2_left_abgeschwollen	V2_left_geschwollen	P2_left_geschwollen	V2_left_simulated	P2_left_simulated	V2_right_abgeschwollen	P2_right_abgeschwollen	V2_right_geschwollen	P2_right_geschwollen	V2_right_simulated	P2_right_simulated	V3_left_abgeschwollen	P3_left_abgeschwollen	V3_left_geschwollen	P3_left_geschwollen	V3_left_simulated	P3_left_simulated	V3_right_abgeschwollen	P3_right_abgeschwollen	V3_right_geschwollen	P3_right_geschwollen	V3_right_simulated	P3_right_simulated	V4_left_abgeschwollen	P4_left_abgeschwollen	V4_left_geschwollen	P4_left_geschwollen	V4_left_simulated	P4_left_simulated	V4_right_abgeschwollen	P4_right_abgeschwollen	V4_right_geschwollen	P4_right_geschwollen	V4_right_simulated	P4_right_simulated	V5_left_abgeschwollen	P5_left_abgeschwollen
430.448	-589.36	179.522	-765.128	-600	797.22	-443.814	-381.851	-144.062	-794.185	-600	-282.68	631.888	-798.998	514.837	-798.024	-600	716.39	-275.566	-797.132	-148.004	-790.89	-600	-785.85	792.782	-213.524	795.053	-673.481	-600	126.58	-594.668	-793.817	-419.153	-794.637	-600	-342.59	731.236	-795.458	719.848	-797.71	-600	250.35	-410.024	-515.101	-404.984	-657.327	-600	-320.16	380.191	-782.302
479.629	-585.672	174.603	-765.108	-550	730.46	-448.106	-379.503	-148.981	-794.166	-550	-243.8	617.103	-798.91	639.293	-796.352	-550	650.75	-287.269	-796.671	-145.489	-782.68	-550	-700.43	788.507	-213.512	791.305	-674.489	-550	109.23	-599.999	-790.757	-293.979	-793.193	-550	-302.47	721.986	-795.44	716.155	-797.71	-550	215.15	-412.044	-510.461	-409.908	-657.327	-550	-275.73	375.247	-779.95
487.013	-583.37	189.375	-762.443	-500	663.31	-438.877	-377.208	-153.285	-794.148	-500	-205.25	612.175	-798.881	634.364	-796.325	-500	585.74	-308.832	-796.935	-147.308	-777.971	-500	-618.59	784.241	-211.47	744.552	-598.224	-500	93.248	-633.128	-790.659	-303.606	-792.836	-500	-263.54	736.176	-791.991	695.229	-797.71	-500	182.37	-411.418	-505.827	-418.526	-658.488	-500	-229.83	378.978	-777.658
463.654	-584.83	172.156	-762.763	-450	595.9	-443.794	-377.188	-172.344	-793.683	-450	-171.64	604.782	-798.837	629.436	-796.298	-450	522.73	-203.476	-795.212	-147.279	-773.272	-450	-539.71	774.644	-206.368	734.941	-594.142	-450	76.413	-637.937	-790.644	-310.026	-793.162	-450	-226.55	721.379	-790.803	160.998	-796.163	-450	146.34	-410.792	-501.193	-414.827	-655.007	-450	-190.27	367.837	-775.262
445.222	-583.591	182.009	-760.078	-400	528.21	-452.398	-377.154	-182.19	-795.2	-400	-139.76	599.854	-798.808	617.117	-795.84	-400	457.15	-218.877	-795.12	-144.169	-768.59	-400	-464.39	768.783	-202.292	730.662	-594.134	-400	62.234	-596.241	-786.71	-313.77	-793.154	-400	-190.68	707.201	-788.458	154.843	-796.55	-400	124.03	-407.699	-496.563	-404.975	-652.687	-400	-153.78	381.483	-773.04
440.306	-583.571	175.858	-760.443	-350	460.33	-448.699	-374.449	-178.483	-791.712	-350	-109.85	594.925	-798.778	610.955	-796.198	-350	394.18	-247.832	-794.949	-141.676	-763.904	-350	-391.94	763.97	-203.293	726.383	-594.125	-350	48.885	-631.508	-786.605	-347.469	-793.087	-350	-157.12	720.155	-786.165	146.227	-796.163	-350	95.594	-403.99	-491.935	-409.899	-652.687	-350	-118.71	382.748	-768.413
436.004	-583.554	194.316	-758.182	-300	392.32	-436.4	-372.555	-147.724	-789.111	-300	-82.784	590.619	-797.579	606.026	-796.171	-300	332.4	-252.76	-794.919	-141.646	-759.205	-300	-323.18	759.695	-203.28	730.674	-591.087	-300	36.666	-636.317	-786.591	-357.097	-793.068	-300	-125.16	712.756	-785.764	140.071	-796.55	-300	69.35	-401.514	-487.304	-414.819	-650.366	-300	-85.739	361.673	-769.424
479.649	-581.009	189.397	-758.162	-250	324.37	-441.316	-372.535	-153.875	-789.476	-250	-60.388	580.146	-797.516	601.098	-796.144	-250	270.58	-270.009	-794.817	-145.35	-760.36	-250	-257.77	753.291	-201.232	726.395	-591.079	-250	26.018	-603.184	-785.674	-385.982	-793.011	-250	-95.352	730.643	-783.868	136.383	-794.229	-250	49.824	-400.271	-482.671	-404.966	-647.659	-250	-61.435	379.056	-763.752
474.116	-581.375	199.25	-755.477	-200	256.58	-454.841	-373.647	-169.86	-789.023	-200	-40.346	576.45	-797.495	596.169	-796.117	-200	210.78	-279.866	-794.758	-141.001	-754.51	-200	-196.07	772.54	-198.245	724.643	-583.627	-200	16.877	-622.416	-784.603	-424.495	-792.934	-200	-67.996	725.098	-781.539	173.931	-791.909	-200	32.686	-399.028	-478.037	-411.121	-648.046	-200	-40.513	375.332	-764.884
491.948	-579.115	184.493	-755.418	-150	189.27	-446.221	-369.796	-176.011	-789.387	-150	-24.112	561.659	-798.581	591.241	-796.09	-150	152.19	-294.651	-794.671	-139.124	-749.821	-150	-138.17	767.193	-199.244	726.442	-579.907	-150	9.6333	-587.145	-783.693	-440.541	-792.902	-150	-43.477	721.396	-782.691	165.931	-791.522	-150	18.505	-400.252	-473.786	-417.276	-648.046	-150	-23.537	371.62	-763.699
487.031	-579.095	178.342	-755.783	-100	122.69	-451.754	-370.162	-180.924	-788.2	-100	-12.107	553.042	-796.964	582.619	-795.652	-100	95.953	-299.579	-794.641	-133.565	-747.501	-100	-84.853	777.888	-197.246	723.233	-579.9	-100	4.5655	-590.351	-783.683	-323.925	-791.103	-100	-22.515	730.034	-780.39	159.775	-791.909	-100	8.7711	-395.925	-468.772	-402.495	-643.019	-100	-11.663	377.223	-759.103
445.237	-580.094	175.876	-756.94	-50	57.629	-433.92	-367.513	-147.7	-784.442	-50	-3.1775	549.338	-798.508	576.456	-796.01	-50	43.095	-304.508	-794.612	-139.71	-745.118	-50	-37.307	750.102	-197.164	725.389	-575.842	-50	1.4245	-629.886	-782.213	-416.462	-790.919	-50	-7.317	694.268	-780.32	154.851	-791.909	-50	3.3698	-394.066	-464.14	-408.651	-643.405	-50	-4.1175	370.407	-759.055
440.94	-578.911	191.881	-753.502	0	0	-440.067	-367.877	-153.851	-784.806	0	0	540.103	-797.279	559.207	-795.916	0	0	-314.365	-794.553	-117.518	-742.889	0	0	741.202	-195.784	723.245	-576.854	0	0	-634.697	-782.537	-421.277	-790.909	0	0	725.131	-765.314	149.928	-791.909	0	0	-394.673	-459.503	-413.575	-643.405	0	0	377.863	-755.631
482.127	-576.355	200.502	-751.202	50	-63.336	-446.201	-365.133	-158.77	-784.786	50	2.4427	531.479	-797.227	548.118	-795.856	50	-47.548	-324.221	-794.495	-113.198	-741.738	50	33.802	746.905	-195.125	794.969	-565.824	50	-1.6449	-620.253	-778.521	-295.032	-789.129	50	5.7715	710.949	-765.287	145.004	-791.909	50	-4.0697	-392.813	-454.872	-416.039	-644.565	50	3.7488	372.912	-754.437
475.979	-576.719	195.583	-751.182	100	-131.04	-451.734	-365.499	-163.689	-784.767	100	8.6417	514.839	-798.303	543.19	-795.829	100	-102.51	-329.15	-794.466	-134.137	-740.449	100	79.556	777.905	-193.188	790.689	-565.816	100	-5.7032	-627.199	-778.501	-302.524	-790.13	100	18.187	747.952	-763.041	140.695	-791.909	100	-11.87	-392.187	-450.237	-400.026	-638.764	100	10.914	372.97	-744.007
473.516	-577.875	186.977	-750.758	150	-201.98	-428.986	-363.259	-168.608	-784.747	150	19.302	497.596	-797.026	538.261	-795.802	150	-162.12	-207.776	-792.838	-139.065	-740.423	150	130.16	758.139	-192.114	786.954	-563.777	150	-12.73	-590.326	-777.596	-309.474	-789.1	150	35.405	721.434	-764.148	173.325	-786.881	150	-25.017	-396.494	-445.593	-404.95	-638.764	150	19.923	368.639	-742.818
494.426	-574.462	180.826	-751.123	200	-275.51	-433.902	-363.239	-173.527	-784.727	200	33.341	585.081	-796.371	530.871	-795.37	200	-225.62	-244.123	-792.622	-118.721	-738.184	200	183.73	752.795	-192.099	783.303	-541.426	200	-21.418	-626.648	-774.444	-314.288	-789.091	200	55.971	725.553	-760.293	167.169	-787.268	200	-42.457	-401.006	-440.562	-409.873	-638.764	200	33.48	368.678	-735.865
489.509	-574.442	174.677	-751.098	250	-351.45	-438.818	-363.219	-178.446	-784.707	250	50.061	545.654	-796.137	496.986	-795.577	250	-292.76	-274.925	-792.439	-143.155	-737.659	250	239.6	739.437	-192.059	779.019	-542.433	250	-32.023	-589.77	-772.524	-347.452	-789.025	250	78.777	710.342	-760.65	162.246	-787.268	250	-64.683	-398.325	-436.318	-414.797	-638.764	250	51.526	364.334	-736.993
420.679	-574.166	170.373	-751.081	300	-428.9	-443.725	-360.868	-148.907	-780.156	300	69.298	535.797	-796.079	624.522	-793.922	300	-363.26	-284.782	-792.381	-109.466	-735.885	300	296.96	734.093	-192.043	767.816	-535.301	300	-43.968	-612.747	-772.456	-358.15	-789.003	300	104.27	746.728	-758.403	157.322	-787.268	300	-90.824	-397.699	-431.684	-400.017	-634.124	300	72.432	365.606	-731.207
416.377	-574.149	198.067	-746.522	350	-509.48	-428.966	-358.596	-153.826	-780.136	350	90.752	525.94	-796.02	553.063	-793.141	350	-437.02	-289.711	-792.351	-136.572	-735.737	350	357.23	769.368	-190.119	796.174	-533.326	350	-57.786	-580.678	-770.522	-385.965	-788.948	350	131.35	730.496	-755.667	152.398	-787.268	350	-120.2	-393.372	-427.057	-404.941	-634.124	350	95.704	364.393	-726.563
484.604	-571.702	193.148	-746.502	400	-591.86	-433.882	-358.576	-158.745	-780.116	400	115.48	521.012	-795.991	523.491	-793.372	400	-513.79	-309.424	-792.234	-113.966	-733.119	400	415.85	790.746	-189.168	767.298	-531.238	400	-73.031	-623.425	-770.395	-424.478	-788.872	400	160.83	726.382	-757.205	147.474	-787.268	400	-158.37	-393.363	-422.421	-409.865	-634.124	400	122.1	365.658	-721.936
479.681	-573.237	188.229	-746.482	450	-676.68	-438.799	-358.556	-163.664	-780.097	450	142.7	501.298	-795.874	519.179	-793.348	450	-593.94	-203.452	-790.515	-118.083	-734.663	450	473.67	780.059	-189.136	764.089	-531.231	450	-90.516	-593.498	-769.469	-436.245	-788.848	450	190.34	712.201	-756.018	143.166	-787.268	450	-200.35	-389.283	-417.793	-413.56	-635.284	450	153.48	361.321	-721.906
467.395	-572.022	183.31	-746.462	500	-763.3	-465.839	-358.448	-168.583	-780.077	500	170.24	554.291	-793.84	501.316	-792.86	500	-677.17	-213.309	-790.457	-141.485	-733.361	500	537.57	758.69	-188.058	767.85	-527.176	500	-108.52	-604.184	-769.438	-322.838	-787.042	500	220.99	744.888	-753.764	178.257	-782.627	500	-236	-389.336	-413.158	-397.546	-629.096	500	187.43	365.687	-716.914
496.905	-569.42	178.391	-746.443	550	-851.26	-470.755	-358.428	-173.502	-780.057	550	199.11	574.321	-495.709	638.09	-791.646	550	-763.89	-250.271	-790.237	-145.181	-733.341	550	600.57	754.411	-189.059	762.501	-527.166	550	-128.09	-608.459	-769.425	-416.98	-786.855	550	251.99	741.193	-751.439	173.333	-782.627	550	-281.71	-386.859	-408.527	-403.701	-629.483	550	221.56	360.721	-718.425
490.758	-569.784	173.472	-746.423	600	-943.07	-443.705	-356.205	-177.806	-780.04	600	232.6	569.392	-495.68	633.161	-791.62	600	-853.79	-253.974	-791.389	-136.542	-731.038	600	661.91	744.793	-189.031	758.774	-523.096	600	-150.39	-611.661	-768.401	-421.26	-786.847	600	284.63	733.793	-751.424	168.409	-782.627	600	-330.17	-370.509	-403.923	-408.01	-629.483	600	258.9	368.189	-712.683
421.314	-569.506	169.168	-746.406	#NULL!	#NULL!	-460.913	-356.136	-121.834	-776.762	#NULL!	#NULL!	579.267	-492.216	628.233	-791.593	-600	#NULL!	-269.985	-790.12	-108.197	-730.018	#NULL!	#NULL!	739.988	-188.002	755.038	-521.057	#NULL!	#NULL!	-577.459	-767.488	-293.945	-785.068	#NULL!	#NULL!	731.324	-752.579	163.485	-782.627	#NULL!	#NULL!	-397.641	-403.87	-395.076	-624.842	#NULL!	#NULL!	363.232	-712.648
506.746	-567.516	194.405	-741.448	#NULL!	#NULL!	-475.662	-356.077	-152.571	-775.471	#NULL!	#NULL!	564.482	-492.128	619.611	-791.154	#NULL!	#NULL!	-279.842	-790.062	-114.966	-728.806	#NULL!	#NULL!	729.301	-187.97	795.164	-519.106	#NULL!	#NULL!	-621.805	-766.341	-307.852	-785.041	#NULL!	#NULL!	715.292	-752.547	158.561	-782.627	#NULL!	#NULL!	-370.499	-399.288	-400	-624.842	#NULL!	#NULL!	358.907	-710.299
501.84	-565.165	188.254	-741.812	#NULL!	#NULL!	-428.945	-353.544	-157.49	-775.451	#NULL!	#NULL!	580.524	-487.527	613.448	-791.512	#NULL!	#NULL!	-294.627	-789.974	-141.456	-728.662	#NULL!	#NULL!	768.312	-187.071	757.721	-519.031	#NULL!	#NULL!	-612.717	-765.354	-311.597	-785.033	#NULL!	#NULL!	709.128	-751.376	153.637	-782.627	#NULL!	#NULL!	-397.631	-399.235	-404.924	-624.842	#NULL!	#NULL!	352.711	-710.256
496.923	-565.146	183.335	-741.793	#NULL!	#NULL!	-435.092	-353.908	-162.41	-775.432	#NULL!	#NULL!	563.268	-488.599	608.52	-791.485	#NULL!	#NULL!	-299.555	-789.945	-145.152	-728.641	#NULL!	#NULL!	765.106	-187.062	790.894	-517.066	#NULL!	#NULL!	-616.987	-764.326	-347.435	-784.962	#NULL!	#NULL!	704.811	-751.368	148.714	-782.627	#NULL!	#NULL!	-382.391	-394.629	-409.232	-624.842	#NULL!	#NULL!	367.596	-708.043
492.621	-565.128	178.416	-741.773	#NULL!	#NULL!	-440.008	-353.888	-167.328	-775.412	#NULL!	#NULL!	531.252	-484.886	603.591	-791.458	#NULL!	#NULL!	-304.483	-789.915	-132.824	-727.534	#NULL!	#NULL!	721.295	-185.917	753.985	-516.992	#NULL!	#NULL!	-620.185	-762.288	-358.133	-784.941	#NULL!	#NULL!	700.492	-752.519	143.79	-782.627	#NULL!	#NULL!	-373.768	-389.624	-395.068	-620.202	#NULL!	#NULL!	362.019	-708.003
438.541	-564.912	173.497	-741.753	#NULL!	#NULL!	-455.986	-353.824	-172.248	-775.392	#NULL!	#NULL!	579.316	-482.823	598.663	-791.432	#NULL!	#NULL!	-314.34	-789.857	-110.632	-725.305	#NULL!	#NULL!	761.909	-185.023	795.181	-515.043	#NULL!	#NULL!	-574.228	-761.41	-385.948	-784.886	#NULL!	#NULL!	695.559	-752.509	138.866	-782.627	#NULL!	#NULL!	-391.448	-391.135	-399.991	-620.202	#NULL!	#NULL!	355.829	-706.801
421.943	-566.011	171.031	-742.911	#NULL!	#NULL!	-465.819	-353.785	-177.167	-775.372	#NULL!	#NULL!	537.425	-482.574	593.735	-791.405	#NULL!	#NULL!	-326.661	-789.784	-115.56	-725.278	#NULL!	#NULL!	758.702	-185.014	787.158	-515.027	#NULL!	#NULL!	-585.444	-760.362	-423.391	-784.811	#NULL!	#NULL!	689.393	-752.497	178.265	-777.987	#NULL!	#NULL!	-374.582	-385.759	-404.915	-620.202	#NULL!	#NULL!	351.497	-705.612
506.766	-562.854	201.793	-739.532	#NULL!	#NULL!	-470.736	-353.765	-150.085	-770.422	#NULL!	#NULL!	559.615	-480.357	588.806	-791.378	#NULL!	#NULL!	-198.511	-788.196	-139.579	-723.973	#NULL!	#NULL!	745.878	-184.976	790.91	-513.003	#NULL!	#NULL!	-616.436	-760.269	-433.019	-784.792	#NULL!	#NULL!	741.202	-746.803	173.341	-777.987	#NULL!	#NULL!	-384.853	-382.649	-409.839	-620.202	#NULL!	#NULL!	366.382	-703.398
501.859	-560.502	196.887	-737.177	#NULL!	#NULL!	-479.954	-353.728	-156.236	-770.786	#NULL!	#NULL!	528.812	-480.174	586.335	-792.539	#NULL!	#NULL!	-208.374	-789.312	-140.165	-719.27	#NULL!	#NULL!	736.26	-184.947	795.198	-510.981	#NULL!	#NULL!	-569.94	-758.379	-319.612	-782.986	#NULL!	#NULL!	706.668	-747.895	169.033	-777.987	#NULL!	#NULL!	-380.631	-378.408	-395.059	-615.561	#NULL!	#NULL!	361.425	-703.364
497.558	-560.485	191.968	-737.157	#NULL!	#NULL!	-444.3	-351.54	-159.925	-770.771	#NULL!	#NULL!	575.028	-478.1	546.915	-791.15	#NULL!	#NULL!	-245.331	-787.918	-113.453	-716.675	#NULL!	#NULL!	730.921	-183.916	786.64	-510.964	#NULL!	#NULL!	-579.55	-756.321	-397.707	-782.831	#NULL!	#NULL!	741.21	-743.327	161.032	-777.987	#NULL!	#NULL!	-367.24	-373.798	-399.983	-615.561	#NULL!	#NULL!	347.166	-704.422
435.483	-561.402	187.049	-737.137	#NULL!	#NULL!	-460.892	-351.085	-172.223	-770.722	#NULL!	#NULL!	541.139	-479.073	533.355	-792.251	#NULL!	#NULL!	-274.899	-787.351	-139.52	-714.575	#NULL!	#NULL!	728.78	-184.925	790.928	-508.941	#NULL!	#NULL!	-588.104	-757.31	-400.916	-782.825	#NULL!	#NULL!	702.981	-742.093	156.108	-777.987	#NULL!	#NULL!	-390.179	-373.753	-404.907	-615.561	#NULL!	#NULL!	355.861	-701.007
505.557	-558.186	182.13	-737.118	#NULL!	#NULL!	-475.641	-351.026	-177.142	-770.702	#NULL!	#NULL!	557.169	-476.82	529.659	-792.231	#NULL!	#NULL!	-284.756	-787.293	-109.319	-712.39	#NULL!	#NULL!	718.101	-182.864	795.211	-507.934	#NULL!	#NULL!	-598.79	-757.278	-419.103	-782.788	#NULL!	#NULL!	698.664	-742.085	151.184	-777.987	#NULL!	#NULL!	-380.611	-369.137	-409.83	-615.561	#NULL!	#NULL!	352.143	-700.981
422.592	-557.853	177.211	-737.098	#NULL!	#NULL!	-424.009	-348.901	-145.142	-765.771	#NULL!	#NULL!	544.848	-476.747	495.168	-790.868	#NULL!	#NULL!	-290.918	-787.648	-114.248	-712.363	#NULL!	#NULL!	708.483	-182.835	786.653	-507.917	#NULL!	#NULL!	-614.816	-756.216	-290.718	-781.012	#NULL!	#NULL!	752.322	-737.167	146.26	-777.987	#NULL!	#NULL!	-377.21	-364.507	-395.05	-610.92	#NULL!	#NULL!	366.617	-698.378
499.416	-556.995	172.292	-737.078	#NULL!	#NULL!	-430.156	-349.265	-151.292	-766.136	#NULL!	#NULL!	528.837	-475.478	555.554	-788.847	#NULL!	#NULL!	-309.398	-787.146	-132.722	-711.087	#NULL!	#NULL!	705.277	-182.826	783.447	-506.895	#NULL!	#NULL!	-611.067	-754.198	-307.3	-780.979	#NULL!	#NULL!	748.619	-738.705	141.337	-777.987	#NULL!	#NULL!	-354.033	-359.917	-399.974	-610.92	#NULL!	#NULL!	359.592	-698.715
504.347	-553.518	200.588	-734.857	#NULL!	#NULL!	-435.072	-349.245	-156.212	-766.116	#NULL!	#NULL!	571.972	-473.385	550.626	-788.821	#NULL!	#NULL!	-193.571	-785.877	-138.051	-709.492	#NULL!	#NULL!	743.758	-180.911	721.942	-504.741	#NULL!	#NULL!	-568.312	-752.296	-346.883	-780.901	#NULL!	#NULL!	720.256	-737.491	178.274	-773.346	#NULL!	#NULL!	-381.517	-359.863	-404.898	-610.92	#NULL!	#NULL!	347.818	-698.632
425.684	-553.203	194.454	-732.108	#NULL!	#NULL!	-439.374	-349.228	-161.131	-766.097	#NULL!	#NULL!	568.276	-473.363	520.44	-788.656	#NULL!	#NULL!	-203.434	-786.993	-110.522	-707.684	#NULL!	#NULL!	727.732	-179.848	782.396	-502.492	#NULL!	#NULL!	-577.395	-752.269	-358.116	-780.878	#NULL!	#NULL!	715.323	-737.482	173.965	-773.346	#NULL!	#NULL!	-365.18	-354.873	-408.593	-612.08	#NULL!	#NULL!	353.411	-695.967
421.997	-553.188	188.303	-732.472	#NULL!	#NULL!	-453.507	-348.783	-169.737	-765.673	#NULL!	#NULL!	552.253	-474.442	503.807	-788.566	#NULL!	#NULL!	-213.29	-786.934	-115.45	-707.657	#NULL!	#NULL!	723.457	-179.836	779.181	-503.839	#NULL!	#NULL!	-588.082	-752.237	-385.931	-780.823	#NULL!	#NULL!	710.39	-737.472	163.502	-773.346	#NULL!	#NULL!	-382.743	-356.384	-395.042	-606.279	#NULL!	#NULL!	369.533	-694.149
504.367	-548.855	183.384	-732.453	#NULL!	#NULL!	-468.256	-348.724	-175.887	-766.037	#NULL!	#NULL!	548.556	-474.421	498.878	-788.539	#NULL!	#NULL!	-250.247	-785.541	-134.533	-705.203	#NULL!	#NULL!	712.766	-180.819	724.992	-500.346	#NULL!	#NULL!	-608.379	-750.147	-430.862	-780.734	#NULL!	#NULL!	705.457	-737.462	158.578	-773.346	#NULL!	#NULL!	-349.433	-350.655	-399.966	-606.279	#NULL!	#NULL!	365.808	-695.282
423.246	-548.53	178.465	-732.433	#NULL!	#NULL!	-460.873	-346.81	-178.353	-767.195	#NULL!	#NULL!	528.861	-470.781	634.423	-786.927	#NULL!	#NULL!	-267.494	-785.047	-109.261	-702.991	#NULL!	#NULL!	756.591	-178.92	784.547	-499.788	#NULL!	#NULL!	-566.696	-749.257	-315.85	-778.931	#NULL!	#NULL!	700.524	-737.453	153.655	-773.346	#NULL!	#NULL!	-381.498	-350.592	-404.274	-606.279	#NULL!	#NULL!	360.858	-694.088
502.34	-543.795	173.546	-732.413	#NULL!	#NULL!	-475.623	-346.751	-140.2	-761.51	#NULL!	#NULL!	568.916	-468.67	629.494	-786.9	#NULL!	#NULL!	-297.065	-784.871	-114.189	-702.965	#NULL!	#NULL!	698.882	-178.748	780.268	-499.779	#NULL!	#NULL!	-576.301	-746.184	-398.764	-779.782	#NULL!	#NULL!	752.331	-732.918	148.731	-773.346	#NULL!	#NULL!	-345.107	-346.027	-392.571	-601.639	#NULL!	#NULL!	345.986	-693.984
420.807	-543.857	171.081	-733.571	#NULL!	#NULL!	-479.31	-346.736	-145.125	-762.658	#NULL!	#NULL!	525.189	-466.062	624.566	-786.874	#NULL!	#NULL!	-303.227	-785.226	-133.888	-700.508	#NULL!	#NULL!	770.496	-175.917	776.528	-498.756	#NULL!	#NULL!	-602.484	-746.106	-416.946	-778.73	#NULL!	#NULL!	748.631	-732.911	143.807	-773.346	#NULL!	#NULL!	-382.105	-345.955	-397.495	-601.639	#NULL!	#NULL!	356.329	-691.352
417.12	-543.842	196.936	-727.837	#NULL!	#NULL!	-419.074	-344.646	-150.038	-761.471	#NULL!	#NULL!	674.279	-465.773	619.638	-786.847	#NULL!	#NULL!	-315.957	-784.759	-109.239	-699.467	#NULL!	#NULL!	741.642	-175.831	731.062	-498.327	#NULL!	#NULL!	-605.16	-747.113	-290.166	-776.951	#NULL!	#NULL!	725.199	-732.479	138.883	-773.346	#NULL!	#NULL!	-344.974	-341.392	-402.419	-601.639	#NULL!	#NULL!	350.336	-691.696
506.864	-539.539	192.017	-727.817	#NULL!	#NULL!	-423.99	-344.626	-154.957	-761.451	#NULL!	#NULL!	565.861	-463.955	614.709	-786.82	#NULL!	#NULL!	-331.563	-784.666	-135.069	-692.278	#NULL!	#NULL!	748.058	-174.836	724.651	-496.622	#NULL!	#NULL!	-584.846	-745.144	-344.726	-776.842	#NULL!	#NULL!	719.032	-732.853	175.82	-768.705	#NULL!	#NULL!	-377.162	-341.329	-406.114	-602.799	#NULL!	#NULL!	342.281	-691.64
501.948	-539.519	187.098	-727.798	#NULL!	#NULL!	-428.907	-344.607	-159.876	-761.432	#NULL!	#NULL!	663.202	-463.359	609.781	-786.793	#NULL!	#NULL!	-335.267	-786.21	-107.941	-688.901	#NULL!	#NULL!	692.491	-173.656	772.8	-494.686	#NULL!	#NULL!	-579.495	-743.131	-356.494	-776.819	#NULL!	#NULL!	714.099	-732.844	165.974	-768.318	#NULL!	#NULL!	-345.087	-336.756	-390.1	-596.611	#NULL!	#NULL!	357.179	-687.109
419.598	-539.189	182.179	-727.778	#NULL!	#NULL!	-433.823	-344.587	-164.801	-762.579	#NULL!	#NULL!	659.506	-463.337	604.853	-786.766	#NULL!	#NULL!	-198.493	-784.674	-109.144	-684.196	#NULL!	#NULL!	767.303	-172.864	732.148	-494.605	#NULL!	#NULL!	-603.001	-742.046	-385.914	-776.761	#NULL!	#NULL!	709.166	-732.834	159.818	-768.705	#NULL!	#NULL!	-375.919	-336.696	-396.256	-596.998	#NULL!	#NULL!	352.221	-687.074
414.682	-539.169	177.26	-727.758	#NULL!	#NULL!	-437.511	-344.572	-169.714	-761.392	#NULL!	#NULL!	521.517	-461.344	599.924	-786.739	#NULL!	#NULL!	-245.304	-782.83	-136.235	-681.698	#NULL!	#NULL!	722.423	-171.716	727.869	-494.597	#NULL!	#NULL!	-601.916	-737.991	-430.845	-776.671	#NULL!	#NULL!	704.233	-732.824	154.894	-768.705	#NULL!	#NULL!	-340.761	-332.129	-401.179	-596.998	#NULL!	#NULL!	349.736	-688.215
286.864	-536.326	172.341	-727.738	#NULL!	#NULL!	-451.031	-344.518	-174.633	-761.372	#NULL!	#NULL!	565.476	-458.865	594.996	-786.712	#NULL!	#NULL!	-274.875	-782.654	-139.939	-682.853	#NULL!	#NULL!	720.281	-172.724	721.985	-494.585	#NULL!	#NULL!	-562.37	-737.094	-315.298	-774.87	#NULL!	#NULL!	699.3	-732.815	149.97	-768.705	#NULL!	#NULL!	-372.21	-332.068	-404.872	-596.998	#NULL!	#NULL!	342.3	-688.163
505.655	-534.871	168.652	-727.723	#NULL!	#NULL!	-455.947	-344.498	-178.328	-762.525	#NULL!	#NULL!	663.226	-458.663	590.068	-786.686	#NULL!	#NULL!	-281.037	-783.009	-109.114	-679.496	#NULL!	#NULL!	704.251	-172.676	767.461	-492.306	#NULL!	#NULL!	-568.77	-734.031	-415.325	-774.671	#NULL!	#NULL!	694.367	-732.805	145.047	-768.705	#NULL!	#NULL!	-339.519	-327.496	-388.861	-592.357	#NULL!	#NULL!	367.106	-684.861
500.739	-534.851	199.42	-723.177	#NULL!	#NULL!	-465.78	-344.459	-152.473	-756.791	#NULL!	#NULL!	659.53	-458.64	585.755	-786.662	#NULL!	#NULL!	-285.966	-782.98	-114.043	-679.47	#NULL!	#NULL!	717.083	-170.685	761.764	-490.263	#NULL!	#NULL!	-560.746	-732.026	-289.615	-772.889	#NULL!	#NULL!	732.604	-730.176	140.738	-768.705	#NULL!	#NULL!	-374.667	-327.428	-393.785	-592.357	#NULL!	#NULL!	364.621	-686.002
415.93	-534.511	194.501	-723.157	#NULL!	#NULL!	-470.696	-344.439	-157.392	-756.771	#NULL!	#NULL!	532.625	-457.887	546.536	-786.057	#NULL!	#NULL!	-290.894	-782.951	-118.355	-679.446	#NULL!	#NULL!	692.508	-169.597	727.886	-490.534	#NULL!	#NULL!	-565.547	-729.982	-346.314	-772.777	#NULL!	#NULL!	688.617	-730.09	137.659	-769.865	#NULL!	#NULL!	-340.125	-322.859	-398.709	-592.357	#NULL!	#NULL!	344.798	-684.704
411.014	-534.492	189.582	-723.137	#NULL!	#NULL!	-460.852	-341.759	-161.081	-756.757	#NULL!	#NULL!	517.839	-457.799	508.752	-785.851	#NULL!	#NULL!	-309.373	-782.45	-105.389	-674.818	#NULL!	#NULL!	758.77	-168.78	724.141	-490.527	#NULL!	#NULL!	-573.032	-730.975	-352.733	-772.764	#NULL!	#NULL!	752.341	-727.896	173.367	-764.064	#NULL!	#NULL!	-376.51	-323.947	-403.633	-592.357	#NULL!	#NULL!	360.925	-682.113
407.951	-532.148	184.663	-723.118	#NULL!	#NULL!	-474.374	-342.093	-172.149	-756.712	#NULL!	#NULL!	673.101	-455.199	495.813	-786.172	#NULL!	#NULL!	-191.08	-780.804	-111.549	-674.784	#NULL!	#NULL!	720.302	-167.651	721.463	-491.537	#NULL!	#NULL!	-560.729	-727.967	-355.947	-773.773	#NULL!	#NULL!	746.791	-728.272	168.443	-764.064	#NULL!	#NULL!	-346.33	-317.825	-406.097	-593.517	#NULL!	#NULL!	354.726	-682.456
288.113	-531.668	179.744	-723.098	#NULL!	#NULL!	-419.053	-339.594	-175.844	-757.865	#NULL!	#NULL!	668.167	-456.343	571.594	-785.41	#NULL!	#NULL!	-194.785	-782.347	-116.478	-674.757	#NULL!	#NULL!	713.89	-167.632	786.733	-488.62	#NULL!	#NULL!	-592.781	-725.843	-385.897	-772.698	#NULL!	#NULL!	725.209	-727.843	163.519	-764.064	#NULL!	#NULL!	-331.679	-313.604	-390.083	-587.33	#NULL!	#NULL!	349.769	-682.421
501.982	-531.359	174.825	-723.078	#NULL!	#NULL!	-425.2	-339.959	-130.94	-754.543	#NULL!	#NULL!	560.981	-454.533	558.05	-783.77	#NULL!	#NULL!	-250.223	-780.844	-120.79	-674.734	#NULL!	#NULL!	681.826	-168.551	766.407	-488.58	#NULL!	#NULL!	-576.195	-720.819	-430.293	-772.61	#NULL!	#NULL!	719.042	-728.218	158.596	-764.064	#NULL!	#NULL!	-363.539	-313.542	-396.238	-587.716	#NULL!	#NULL!	346.064	-680.077
497.071	-530.173	169.906	-723.058	#NULL!	#NULL!	-430.116	-339.939	-149.989	-752.131	#NULL!	#NULL!	537.571	-454.394	551.888	-784.128	#NULL!	#NULL!	-262.543	-780.771	-133.727	-674.663	#NULL!	#NULL!	674.349	-167.514	761.068	-486.199	#NULL!	#NULL!	-581.534	-719.789	-314.212	-770.809	#NULL!	#NULL!	714.109	-728.208	153.672	-764.064	#NULL!	#NULL!	-326.839	-308.978	-401.162	-587.716	#NULL!	#NULL!	363.428	-677.881
492.154	-530.154	201.904	-718.517	#NULL!	#NULL!	-435.033	-339.919	-154.908	-752.111	#NULL!	#NULL!	526.482	-454.328	519.237	-783.95	#NULL!	#NULL!	-267.472	-780.741	-101.663	-670.139	#NULL!	#NULL!	755.573	-166.741	726.833	-486.47	#NULL!	#NULL!	-586.343	-719.774	-407.819	-770.623	#NULL!	#NULL!	709.176	-728.198	147.517	-764.064	#NULL!	#NULL!	-363.529	-308.907	-403.626	-588.876	#NULL!	#NULL!	358.47	-677.846
412.263	-529.834	196.985	-718.497	#NULL!	#NULL!	-438.725	-341.07	-159.827	-752.092	#NULL!	#NULL!	514.161	-454.255	501.374	-783.462	#NULL!	#NULL!	-297.042	-780.566	-106.592	-670.112	#NULL!	#NULL!	749.173	-163.678	723.624	-486.463	#NULL!	#NULL!	-549.466	-717.855	-415.843	-770.607	#NULL!	#NULL!	704.243	-728.189	142.593	-764.064	#NULL!	#NULL!	-330.221	-304.336	-385.151	-583.076	#NULL!	#NULL!	353.513	-677.812
283.821	-529.319	192.066	-718.477	#NULL!	#NULL!	-443.636	-339.885	-164.746	-752.072	#NULL!	#NULL!	559.773	-449.829	633.22	-782.221	#NULL!	#NULL!	-301.971	-780.537	-115.832	-670.062	#NULL!	#NULL!	717.109	-164.597	785.68	-484.555	#NULL!	#NULL!	-553.74	-717.842	-290.668	-768.825	#NULL!	#NULL!	699.309	-728.179	137.669	-764.064	#NULL!	#NULL!	-365.164	-304.268	-390.075	-583.076	#NULL!	#NULL!	348.569	-675.459
487.248	-527.802	187.147	-718.457	#NULL!	#NULL!	-448.553	-339.865	-169.665	-752.052	#NULL!	#NULL!	526.507	-449.631	628.292	-782.195	#NULL!	#NULL!	-316.756	-780.449	-121.377	-670.031	#NULL!	#NULL!	704.289	-163.545	783.537	-485.567	#NULL!	#NULL!	-573.331	-717.446	-301.365	-768.804	#NULL!	#NULL!	694.376	-728.17	133.977	-764.064	#NULL!	#NULL!	-329.389	-299.702	-394.999	-583.076	#NULL!	#NULL!	363.456	-672.859
407.971	-527.485	182.228	-718.438	#NULL!	#NULL!	-453.469	-339.845	-173.354	-752.037	#NULL!	#NULL!	512.954	-449.551	623.363	-782.168	#NULL!	#NULL!	-329.077	-780.376	-131.233	-669.978	#NULL!	#NULL!	698.941	-164.543	755.726	-484.496	#NULL!	#NULL!	-590.08	-718.749	-345.231	-769.732	#NULL!	#NULL!	732.61	-727.085	173.376	-759.037	#NULL!	#NULL!	-364.127	-299.634	-399.923	-583.076	#NULL!	#NULL!	357.257	-673.202
381.545	-527.379	177.31	-718.418	#NULL!	#NULL!	-468.219	-339.786	-131.53	-749.87	#NULL!	#NULL!	536.37	-448.516	618.435	-782.141	#NULL!	#NULL!	-334.005	-780.346	-134.93	-669.958	#NULL!	#NULL!	687.186	-164.508	764.293	-482.482	#NULL!	#NULL!	-585.258	-715.719	-352.716	-768.702	#NULL!	#NULL!	688.215	-725.84	167.221	-759.424	#NULL!	#NULL!	-326.296	-295.072	-403.618	-584.236	#NULL!	#NULL!	353.533	-674.335
286.904	-527	172.391	-718.398	#NULL!	#NULL!	-458.374	-337.106	-146.287	-749.811	#NULL!	#NULL!	557.333	-445.117	613.507	-782.114	#NULL!	#NULL!	-242.818	-778.539	-109.657	-667.746	#NULL!	#NULL!	683.98	-164.499	757.874	-482.469	#NULL!	#NULL!	-549.983	-713.795	-385.88	-768.636	#NULL!	#NULL!	684.515	-725.833	162.297	-759.424	#NULL!	#NULL!	-367.817	-294.992	-385.143	-578.435	#NULL!	#NULL!	348.595	-670.823
490.945	-525.486	168.701	-718.384	#NULL!	#NULL!	-464.521	-337.469	-152.424	-747.451	#NULL!	#NULL!	531.46	-444.964	608.578	-782.087	#NULL!	#NULL!	-272.388	-778.364	-126.29	-667.655	#NULL!	#NULL!	670.091	-163.443	726.846	-483.423	#NULL!	#NULL!	-553.728	-714.798	-398.182	-768.611	#NULL!	#NULL!	751.733	-723.646	157.373	-759.424	#NULL!	#NULL!	-325.788	-290.438	-390.067	-578.435	#NULL!	#NULL!	344.257	-670.793
280.768	-524.644	201.929	-713.847	#NULL!	#NULL!	-470.667	-337.445	-157.343	-747.432	#NULL!	#NULL!	526.531	-444.935	603.65	-782.061	#NULL!	#NULL!	-277.317	-778.335	-122.579	-665.326	#NULL!	#NULL!	744.912	-160.622	723.636	-483.416	#NULL!	#NULL!	-568.689	-714.754	-412.625	-768.583	#NULL!	#NULL!	748.648	-724.799	152.45	-759.424	#NULL!	#NULL!	-365.957	-290.36	-394.99	-578.435	#NULL!	#NULL!	368.439	-668.259
277.081	-524.629	197.01	-713.827	#NULL!	#NULL!	-414.118	-335.34	-162.268	-748.579	#NULL!	#NULL!	509.282	-444.832	598.721	-782.034	#NULL!	#NULL!	-282.245	-778.305	-130.791	-664.889	#NULL!	#NULL!	707.508	-160.51	753.599	-481.445	#NULL!	#NULL!	-579.372	-713.707	-429.741	-768.549	#NULL!	#NULL!	727.684	-723.599	147.526	-759.424	#NULL!	#NULL!	-324.015	-285.419	-398.683	-578.435	#NULL!	#NULL!	362.24	-668.601
485.63	-522.744	192.091	-713.807	#NULL!	#NULL!	-419.035	-335.32	-167.181	-747.392	#NULL!	#NULL!	553.045	-440.395	593.793	-782.007	#NULL!	#NULL!	-287.173	-778.276	-109.019	-664.225	#NULL!	#NULL!	694.684	-160.472	767.877	-478.088	#NULL!	#NULL!	-581.513	-714.716	-305.635	-766.425	#NULL!	#NULL!	722.751	-723.589	142.602	-759.424	#NULL!	#NULL!	-362.864	-285.73	-385.134	-573.794	#NULL!	#NULL!	357.283	-668.567
407.376	-522.82	187.172	-713.788	#NULL!	#NULL!	-423.951	-335.3	-172.1	-747.372	#NULL!	#NULL!	530.246	-441.434	588.865	-781.98	#NULL!	#NULL!	-292.102	-778.247	-127.478	-660.6	#NULL!	#NULL!	706.499	-146.303	721.518	-478.334	#NULL!	#NULL!	-564.402	-711.723	-312.055	-766.751	#NULL!	#NULL!	717.818	-723.58	137.678	-759.424	#NULL!	#NULL!	-319.867	-281.564	-390.058	-573.794	#NULL!	#NULL!	352.326	-668.532
380.335	-522.711	182.253	-713.768	#NULL!	#NULL!	-428.868	-335.281	-175.789	-747.358	#NULL!	#NULL!	525.323	-440.231	586.393	-783.141	#NULL!	#NULL!	-306.887	-778.159	-132.407	-660.573	#NULL!	#NULL!	702.224	-146.29	771.816	-474.372	#NULL!	#NULL!	-584.707	-711.662	-340.94	-766.694	#NULL!	#NULL!	712.885	-723.57	135.214	-760.584	#NULL!	#NULL!	-361.622	-281.097	-394.982	-573.794	#NULL!	#NULL!	344.283	-666.158
284.465	-522.327	177.334	-713.748	#NULL!	#NULL!	-433.784	-335.261	-147.49	-744.747	#NULL!	#NULL!	505.622	-437.765	575.312	-781.906	#NULL!	#NULL!	-311.199	-778.133	-134.878	-661.734	#NULL!	#NULL!	697.949	-146.277	768.606	-474.365	#NULL!	#NULL!	-549.966	-709.736	-415.83	-767.561	#NULL!	#NULL!	707.952	-723.561	173.384	-754.783	#NULL!	#NULL!	-311.664	-276.558	-398.675	-573.794	#NULL!	#NULL!	368.463	-664.009
279.559	-519.976	172.415	-713.728	#NULL!	#NULL!	-437.476	-336.412	-137.027	-742.843	#NULL!	#NULL!	674.431	-436.419	546.155	-781.356	#NULL!	#NULL!	-186.127	-776.136	-128.681	-655.894	#NULL!	#NULL!	657.343	-145.142	770.759	-471.322	#NULL!	#NULL!	-579.355	-709.649	-290.116	-764.763	#NULL!	#NULL!	703.019	-723.551	168.46	-754.783	#NULL!	#NULL!	-361.612	-276.461	-392.511	-569.153	#NULL!	#NULL!	359.788	-663.948
487.287	-518.476	167.496	-713.709	#NULL!	#NULL!	-447.304	-335.207	-153.629	-742.776	#NULL!	#NULL!	550.606	-435.684	513.71	-781.179	#NULL!	#NULL!	-191.674	-776.495	-133.61	-655.867	#NULL!	#NULL!	654.133	-146.147	747.236	-468.229	#NULL!	#NULL!	-564.919	-707.663	-299.207	-764.407	#NULL!	#NULL!	698.086	-723.541	163.537	-754.783	#NULL!	#NULL!	-309.805	-271.926	-397.435	-569.153	#NULL!	#NULL!	354.83	-663.914
483.6	-518.462	198.264	-709.162	#NULL!	#NULL!	-452.221	-335.187	-168.386	-742.717	#NULL!	#NULL!	545.689	-433.306	507.547	-781.537	#NULL!	#NULL!	-200.915	-776.44	-115.73	-653.615	#NULL!	#NULL!	617.798	-146.039	746.179	-465.18	#NULL!	#NULL!	-548.345	-705.345	-352.699	-764.639	#NULL!	#NULL!	693.153	-723.532	158.613	-754.783	#NULL!	#NULL!	-361.602	-271.826	-392.502	-564.126	#NULL!	#NULL!	349.253	-663.875
407.39	-519.322	193.345	-709.142	#NULL!	#NULL!	-458.356	-332.831	-172.081	-743.87	#NULL!	#NULL!	541.371	-434.455	495.226	-781.47	#NULL!	#NULL!	-262.517	-775.683	-137.907	-653.494	#NULL!	#NULL!	692.618	-143.218	767.606	-457.775	#NULL!	#NULL!	-551.556	-706.688	-386.933	-764.571	#NULL!	#NULL!	688.224	-721.204	153.689	-754.783	#NULL!	#NULL!	-307.637	-267.295	-398.042	-564.513	#NULL!	#NULL!	364.139	-661.661
379.126	-518.043	188.427	-709.122	#NULL!	#NULL!	-463.273	-332.811	-142.549	-740.486	#NULL!	#NULL!	517.97	-432.75	563.008	-779.098	#NULL!	#NULL!	-268.68	-776.037	-119.411	-651.245	#NULL!	#NULL!	612.463	-143.994	769.757	-455.07	#NULL!	#NULL!	-576.132	-705.6	-397.096	-764.551	#NULL!	#NULL!	684.524	-721.197	148.765	-754.783	#NULL!	#NULL!	-360.976	-267.191	-385.113	-562.192	#NULL!	#NULL!	343.692	-661.131
283.256	-517.66	183.507	-709.103	#NULL!	#NULL!	-466.965	-333.962	-147.468	-740.466	#NULL!	#NULL!	500.718	-433.039	556.845	-779.456	#NULL!	#NULL!	-297.016	-775.478	-126.185	-650.817	#NULL!	#NULL!	608.193	-142.966	765.482	-454.046	#NULL!	#NULL!	-548.329	-701.624	-405.119	-764.535	#NULL!	#NULL!	654.926	-721.14	143.841	-754.783	#NULL!	#NULL!	-314.248	-262.26	-390.032	-559.872	#NULL!	#NULL!	339.965	-662.65
280.193	-515.316	178.589	-709.083	#NULL!	#NULL!	-411.639	-330.298	-137.617	-738.17	#NULL!	#NULL!	537.077	-430.907	553.142	-780.611	#NULL!	#NULL!	-303.178	-775.833	-131.732	-651.178	#NULL!	#NULL!	605	-139.913	744.086	-454.004	#NULL!	#NULL!	-551.539	-702.629	-427.585	-764.49	#NULL!	#NULL!	751.124	-720.168	138.918	-754.783	#NULL!	#NULL!	-357.878	-260.244	-394.956	-559.872	#NULL!	#NULL!	368.483	-660.533
487.307	-513.813	173.669	-709.063	#NULL!	#NULL!	-417.786	-330.662	-152.374	-738.111	#NULL!	#NULL!	519.224	-428.452	521.115	-779.261	#NULL!	#NULL!	-326.586	-775.302	-113.236	-648.929	#NULL!	#NULL!	675.541	-138.094	648.869	-454.83	#NULL!	#NULL!	-561.153	-701.586	-305.084	-762.702	#NULL!	#NULL!	727.695	-718.577	133.994	-754.783	#NULL!	#NULL!	-315.874	-258.008	-398.649	-559.872	#NULL!	#NULL!	356.098	-658.9
483.005	-513.796	169.974	-710.216	#NULL!	#NULL!	-422.702	-330.642	-167.131	-738.052	#NULL!	#NULL!	515.522	-429.604	501.401	-779.154	#NULL!	#NULL!	-332.132	-775.661	-122.462	-646.53	#NULL!	#NULL!	608.214	-137.893	739.815	-451.964	#NULL!	#NULL!	-571.482	-701.217	-308.833	-763.711	#NULL!	#NULL!	721.528	-718.951	130.305	-752.463	#NULL!	#NULL!	-356.019	-255.612	-385.103	-557.165	#NULL!	#NULL!	351.132	-660.411
365.021	-510.992	194.6	-704.477	#NULL!	#NULL!	-427.619	-330.623	-170.827	-739.205	#NULL!	#NULL!	495.814	-428.313	629.553	-777.502	#NULL!	#NULL!	-335.219	-776.817	-127.391	-646.503	#NULL!	#NULL!	600.733	-137.871	763.355	-450.995	#NULL!	#NULL!	-575.05	-702.559	-339.318	-762.634	#NULL!	#NULL!	719.059	-720.105	173.393	-750.142	#NULL!	#NULL!	-309.767	-253.77	-391.87	-555.231	#NULL!	#NULL!	363.547	-656.635
279.598	-510.65	189.681	-704.457	#NULL!	#NULL!	-431.311	-331.774	-142.524	-735.816	#NULL!	#NULL!	670.777	-428.178	624.625	-777.476	#NULL!	#NULL!	-242.793	-773.843	-132.319	-646.476	#NULL!	#NULL!	596.458	-137.858	744.103	-449.941	#NULL!	#NULL!	-561.14	-698.542	-288.494	-760.704	#NULL!	#NULL!	707.962	-718.925	168.469	-750.142	#NULL!	#NULL!	-346.914	-250.994	-377.709	-552.524	#NULL!	#NULL!	341.857	-656.869
277.135	-511.806	184.762	-704.438	#NULL!	#NULL!	-448.514	-330.539	-147.443	-735.796	#NULL!	#NULL!	665.855	-426.974	619.696	-777.449	#NULL!	#NULL!	-273.596	-773.66	-126.127	-641.419	#NULL!	#NULL!	587.909	-137.833	759.084	-448.955	#NULL!	#NULL!	-569.69	-698.517	-297.587	-760.686	#NULL!	#NULL!	703.029	-718.915	163.545	-750.142	#NULL!	#NULL!	-299.274	-248.769	-383.865	-552.911	#NULL!	#NULL!	335.034	-657.98
483.639	-509.136	179.843	-704.418	#NULL!	#NULL!	-453.43	-330.519	-138.822	-733.496	#NULL!	#NULL!	534.021	-426.192	614.768	-777.422	#NULL!	#NULL!	-279.756	-773.623	-132.29	-641.777	#NULL!	#NULL!	611.967	-134.861	739.828	-448.917	#NULL!	#NULL!	-573.96	-697.49	-301.336	-761.694	#NULL!	#NULL!	698.095	-718.906	158.621	-750.142	#NULL!	#NULL!	-346.134	-246.36	-388.173	-552.911	#NULL!	#NULL!	353.643	-654.634
479.952	-509.121	174.924	-704.398	#NULL!	#NULL!	-458.337	-328.168	-152.348	-733.052	#NULL!	#NULL!	492.136	-424.769	609.84	-777.395	#NULL!	#NULL!	-284.685	-773.594	-134.761	-642.938	#NULL!	#NULL!	667.008	-134.01	746.261	-445.545	#NULL!	#NULL!	-577.158	-695.451	-352.682	-760.577	#NULL!	#NULL!	693.162	-718.896	153.698	-750.142	#NULL!	#NULL!	-298.875	-243.748	-375.239	-548.27	#NULL!	#NULL!	349.306	-654.604
364.421	-507.493	171.235	-704.384	#NULL!	#NULL!	-462.638	-328.151	-167.105	-732.993	#NULL!	#NULL!	673.272	-422.322	604.911	-777.368	#NULL!	#NULL!	-289.613	-773.565	-95.3125	-639.629	#NULL!	#NULL!	659.536	-131.958	743.046	-446.892	#NULL!	#NULL!	-532.269	-694.57	-386.916	-760.509	#NULL!	#NULL!	657.397	-718.827	148.774	-750.142	#NULL!	#NULL!	-346.124	-241.724	-380.163	-548.27	#NULL!	#NULL!	331.329	-655.636
277.159	-505.978	192.165	-699.797	#NULL!	#NULL!	-406.703	-325.655	-170.802	-734.535	#NULL!	#NULL!	660.951	-422.248	599.983	-777.341	#NULL!	#NULL!	-309.333	-774.622	-121.169	-636.747	#NULL!	#NULL!	655.261	-131.946	724.872	-443.809	#NULL!	#NULL!	-536.895	-693.203	-396.544	-760.49	#NULL!	#NULL!	735.51	-716.274	143.85	-750.142	#NULL!	#NULL!	-299.563	-239.497	-385.087	-548.27	#NULL!	#NULL!	327.617	-654.451
274.696	-507.133	187.246	-699.778	#NULL!	#NULL!	-412.85	-326.019	-144.959	-731.136	#NULL!	#NULL!	531.575	-422.654	595.054	-777.314	#NULL!	#NULL!	-182.409	-771.853	-127.332	-637.105	#NULL!	#NULL!	650.987	-131.933	746.276	-441.821	#NULL!	#NULL!	-560.405	-693.133	-407.242	-760.468	#NULL!	#NULL!	688.234	-716.569	138.926	-750.142	#NULL!	#NULL!	-347.964	-237.085	-388.78	-548.27	#NULL!	#NULL!	362.332	-652.377
482.43	-504.468	182.327	-699.758	#NULL!	#NULL!	-417.766	-325.999	-159.101	-731.079	#NULL!	#NULL!	488.452	-422.398	590.126	-777.288	#NULL!	#NULL!	-187.337	-771.823	-131.036	-638.259	#NULL!	#NULL!	647.78	-131.923	743.067	-441.814	#NULL!	#NULL!	-573.948	-694.446	-422.754	-760.438	#NULL!	#NULL!	684.532	-717.721	134.002	-750.142	#NULL!	#NULL!	-283.212	-234.893	-281.678	-543.243	#NULL!	#NULL!	357.374	-652.342
478.738	-505.619	177.408	-699.738	#NULL!	#NULL!	-422.068	-325.982	-141.257	-728.816	#NULL!	#NULL!	670.826	-418.784	585.814	-777.264	#NULL!	#NULL!	-192.266	-771.794	-113.134	-632.483	#NULL!	#NULL!	610.377	-131.812	724.889	-439.747	#NULL!	#NULL!	-570.195	-691.413	-304.532	-758.641	#NULL!	#NULL!	726.47	-714.325	169.709	-745.501	#NULL!	#NULL!	-344.255	-232.457	-372.768	-543.243	#NULL!	#NULL!	343.122	-652.242
275.95	-501.31	173.104	-699.721	#NULL!	#NULL!	-448.494	-325.876	-149.863	-728.392	#NULL!	#NULL!	656.047	-417.522	577.808	-776.829	#NULL!	#NULL!	-194.736	-772.954	-118.678	-632.453	#NULL!	#NULL!	586.336	-130.726	741.479	-437.749	#NULL!	#NULL!	-534.385	-689.49	-338.766	-758.573	#NULL!	#NULL!	721.537	-714.316	164.785	-745.501	#NULL!	#NULL!	-279.503	-230.265	-378.924	-543.629	#NULL!	#NULL!	351.193	-649.595
482.45	-499.805	192.19	-695.127	#NULL!	#NULL!	-453.41	-325.856	-156.014	-728.757	#NULL!	#NULL!	531.606	-416.784	571.645	-777.187	#NULL!	#NULL!	-203.97	-771.725	-123.607	-632.426	#NULL!	#NULL!	585.818	-126.666	740.426	-433.684	#NULL!	#NULL!	-539.733	-690.489	-285.802	-756.647	#NULL!	#NULL!	716.604	-714.306	159.861	-745.501	#NULL!	#NULL!	-340.545	-227.828	-383.847	-543.629	#NULL!	#NULL!	340.037	-649.903
478.148	-499.788	187.271	-695.108	#NULL!	#NULL!	-457.088	-323.51	-164.62	-728.333	#NULL!	#NULL!	662.836	-415.214	547.003	-777.053	#NULL!	#NULL!	-257.566	-771.407	-128.535	-632.399	#NULL!	#NULL!	582.608	-127.671	628.632	-433.462	#NULL!	#NULL!	-555.759	-689.427	-351.06	-756.517	#NULL!	#NULL!	707.972	-713.903	154.937	-745.501	#NULL!	#NULL!	-278.877	-225.631	-388.156	-543.629	#NULL!	#NULL!	332.601	-649.851
478.782	-495.127	182.352	-695.088	#NULL!	#NULL!	-462.009	-324.656	-169.548	-729.87	#NULL!	#NULL!	496.503	-414.227	543.299	-778.207	#NULL!	#NULL!	-262.495	-771.377	-113.718	-627.389	#NULL!	#NULL!	579.402	-127.661	624.888	-433.455	#NULL!	#NULL!	-542.931	-688.45	-385.294	-756.449	#NULL!	#NULL!	701.805	-714.277	150.013	-745.501	#NULL!	#NULL!	-339.303	-223.195	-276.746	-538.989	#NULL!	#NULL!	345.64	-645.306
475.095	-495.112	177.433	-695.068	#NULL!	#NULL!	-404.226	-321.39	-142.46	-723.752	#NULL!	#NULL!	484.183	-414.154	516.203	-776.494	#NULL!	#NULL!	-267.423	-771.348	-119.881	-627.747	#NULL!	#NULL!	562.303	-127.61	739.909	-429.62	#NULL!	#NULL!	-568.575	-687.359	-397.596	-756.425	#NULL!	#NULL!	696.872	-714.268	145.089	-745.501	#NULL!	#NULL!	-279.484	-220.994	-281.67	-538.989	#NULL!	#NULL!	341.296	-646.435
477.573	-490.459	173.744	-695.053	#NULL!	#NULL!	-409.143	-321.371	-148.611	-724.116	#NULL!	#NULL!	651.143	-412.796	510.041	-776.852	#NULL!	#NULL!	-294.527	-770.796	-124.809	-627.72	#NULL!	#NULL!	570.865	-124.592	735.629	-429.612	#NULL!	#NULL!	-534.369	-685.432	-400.806	-756.418	#NULL!	#NULL!	691.939	-714.258	140.166	-745.501	#NULL!	#NULL!	-332.51	-218.573	-285.978	-538.989	#NULL!	#NULL!	336.965	-645.245
473.885	-490.445	195.891	-692.807	#NULL!	#NULL!	-414.059	-321.351	-153.53	-724.096	#NULL!	#NULL!	530.398	-412.079	505.112	-776.825	#NULL!	#NULL!	-300.69	-771.15	-129.122	-627.697	#NULL!	#NULL!	637.128	-123.775	732.416	-430.621	#NULL!	#NULL!	-554.673	-685.371	-408.295	-756.404	#NULL!	#NULL!	742.505	-713.198	135.857	-745.501	#NULL!	#NULL!	-276.699	-216.364	-370.298	-538.602	#NULL!	#NULL!	332.627	-645.215
482.499	-488.147	189.755	-690.448	#NULL!	#NULL!	-418.976	-321.331	-158.449	-724.077	#NULL!	#NULL!	492.203	-411.853	496.49	-776.386	#NULL!	#NULL!	-305.002	-771.125	-118.62	-623.055	#NULL!	#NULL!	585.835	-122.607	626.51	-429.395	#NULL!	#NULL!	-557.884	-686.376	-411.508	-757.413	#NULL!	#NULL!	737.575	-712.029	132.778	-746.662	#NULL!	#NULL!	-330.034	-213.942	-376.453	-538.989	#NULL!	#NULL!	353.709	-643.045
362.661	-487.668	184.836	-690.428	#NULL!	#NULL!	-423.277	-321.314	-160.915	-725.234	#NULL!	#NULL!	659.774	-411.673	490.943	-776.748	#NULL!	#NULL!	-324.099	-771.011	-123.548	-623.028	#NULL!	#NULL!	625.385	-120.696	623.3	-429.389	#NULL!	#NULL!	-563.757	-685.344	-420.597	-756.379	#NULL!	#NULL!	679.608	-713.075	168.486	-740.861	#NULL!	#NULL!	-265.894	-209.431	-381.377	-538.989	#NULL!	#NULL!	349.371	-643.015
477.592	-485.796	179.917	-690.408	#NULL!	#NULL!	-446.014	-320.834	-166.645	-723.655	#NULL!	#NULL!	497.144	-409.534	565.501	-774.412	#NULL!	#NULL!	-328.412	-770.986	-128.476	-623.001	#NULL!	#NULL!	573.015	-121.555	738.856	-425.556	#NULL!	#NULL!	-540.238	-683.385	-304.515	-754.578	#NULL!	#NULL!	732.647	-709.316	163.562	-740.861	#NULL!	#NULL!	-331.874	-209.303	-386.301	-538.989	#NULL!	#NULL!	346.286	-640.675
473.905	-485.782	174.998	-690.388	#NULL!	#NULL!	-451.547	-321.201	-170.753	-725.195	#NULL!	#NULL!	482.353	-410.62	559.339	-774.77	#NULL!	#NULL!	-242.769	-769.146	-122.287	-618.336	#NULL!	#NULL!	558.054	-121.51	735.642	-426.565	#NULL!	#NULL!	-568.562	-684.316	-339.284	-754.51	#NULL!	#NULL!	726.48	-709.69	158.639	-740.861	#NULL!	#NULL!	-262.801	-204.802	-388.765	-540.149	#NULL!	#NULL!	332.653	-640.58
358.984	-485.321	171.309	-690.374	#NULL!	#NULL!	-401.748	-316.737	-141.208	-719.476	#NULL!	#NULL!	655.48	-408.125	555.026	-774.747	#NULL!	#NULL!	-247.081	-769.12	-127.215	-618.309	#NULL!	#NULL!	586.917	-119.567	622.243	-426.34	#NULL!	#NULL!	-533.817	-681.375	-346.238	-754.496	#NULL!	#NULL!	721.547	-709.68	153.715	-740.861	#NULL!	#NULL!	-331.865	-204.667	-274.275	-533.961	#NULL!	#NULL!	351.256	-638.392
482.519	-483.485	194.68	-689.3	#NULL!	#NULL!	-406.665	-316.717	-146.127	-719.456	#NULL!	#NULL!	647.471	-408.078	629.582	-772.803	#NULL!	#NULL!	-282.196	-768.912	-129.686	-619.47	#NULL!	#NULL!	580.505	-119.548	674.693	-419.335	#NULL!	#NULL!	-554.661	-682.328	-415.775	-754.358	#NULL!	#NULL!	716.614	-709.671	148.791	-740.861	#NULL!	#NULL!	-260.325	-200.171	-280.43	-534.348	#NULL!	#NULL!	341.335	-639.481
478.841	-481.138	188.55	-685.773	#NULL!	#NULL!	-411.581	-316.698	-151.046	-719.436	#NULL!	#NULL!	530.423	-407.383	624.654	-772.777	#NULL!	#NULL!	-287.124	-768.883	-118.561	-613.657	#NULL!	#NULL!	576.23	-119.535	723.921	-415.37	#NULL!	#NULL!	-564.986	-680.944	-284.716	-752.587	#NULL!	#NULL!	711.681	-709.661	143.867	-740.861	#NULL!	#NULL!	-328.772	-200.038	-285.354	-534.348	#NULL!	#NULL!	345.692	-636.035
358.384	-481.822	183.631	-685.753	#NULL!	#NULL!	-416.498	-316.678	-155.965	-719.417	#NULL!	#NULL!	492.228	-407.156	619.726	-772.75	#NULL!	#NULL!	-189.777	-767.112	-123.49	-613.63	#NULL!	#NULL!	620.054	-117.636	660.82	-411.182	#NULL!	#NULL!	-529	-679.36	-349.438	-752.458	#NULL!	#NULL!	706.747	-709.651	138.943	-740.861	#NULL!	#NULL!	-256.615	-195.542	-290.278	-534.348	#NULL!	#NULL!	333.918	-635.953
268.674	-477.965	181.165	-686.911	#NULL!	#NULL!	-421.414	-316.658	-160.884	-719.397	#NULL!	#NULL!	497.168	-404.837	614.797	-772.723	#NULL!	#NULL!	-193.479	-768.264	-128.418	-613.603	#NULL!	#NULL!	554.865	-117.442	657.61	-411.176	#NULL!	#NULL!	-537.549	-679.335	-382.602	-752.392	#NULL!	#NULL!	701.814	-709.642	134.019	-740.861	#NULL!	#NULL!	-323.212	-195.413	-365.366	-534.348	#NULL!	#NULL!	330.194	-637.085
264.991	-476.785	172.563	-685.709	#NULL!	#NULL!	-426.33	-316.639	-164.579	-720.55	#NULL!	#NULL!	479.919	-404.735	609.869	-772.696	#NULL!	#NULL!	-205.794	-767.017	-111.147	-610.173	#NULL!	#NULL!	544.178	-117.41	659.763	-408.133	#NULL!	#NULL!	-540.759	-680.34	-394.37	-752.369	#NULL!	#NULL!	698.112	-710.793	129.096	-740.861	#NULL!	#NULL!	-251.056	-190.918	-370.29	-534.348	#NULL!	#NULL!	351.697	-633.373
268.079	-473.3	168.259	-685.691	#NULL!	#NULL!	-430.632	-316.622	-146.102	-714.786	#NULL!	#NULL!	646.264	-403.374	604.941	-772.669	#NULL!	#NULL!	-252.614	-766.739	-116.068	-608.971	#NULL!	#NULL!	609.376	-115.575	703.647	-402.804	#NULL!	#NULL!	-533.8	-677.317	-400.789	-752.356	#NULL!	#NULL!	693.182	-709.625	125.407	-738.54	#NULL!	#NULL!	-317.653	-190.788	-375.214	-534.348	#NULL!	#NULL!	341.383	-630.983
476.417	-472.968	163.149	-682.947	#NULL!	#NULL!	-438.62	-316.201	-151.021	-714.766	#NULL!	#NULL!	531.063	-402.69	600.012	-772.642	#NULL!	#NULL!	-257.542	-766.71	-120.996	-608.944	#NULL!	#NULL!	535.646	-113.326	700.432	-404.151	#NULL!	#NULL!	-549.83	-677.269	-303.964	-750.517	#NULL!	#NULL!	688.865	-709.617	168.495	-736.22	#NULL!	#NULL!	-311.477	-186.164	-380.137	-534.348	#NULL!	#NULL!	333.325	-631.313
362.73	-471.347	187.345	-681.098	#NULL!	#NULL!	-444.767	-316.565	-155.94	-714.747	#NULL!	#NULL!	492.252	-402.459	595.084	-772.615	#NULL!	#NULL!	-262.47	-766.681	-125.924	-608.917	#NULL!	#NULL!	532.44	-113.317	691.523	-402.779	#NULL!	#NULL!	-554.639	-677.255	-339.267	-750.447	#NULL!	#NULL!	666.054	-707.254	163.571	-736.22	#NULL!	#NULL!	-254.176	-183.958	-385.061	-534.348	#NULL!	#NULL!	352.548	-629.13
266.87	-468.632	182.426	-681.078	#NULL!	#NULL!	-449.069	-316.548	-160.859	-714.727	#NULL!	#NULL!	666.605	-401.146	590.155	-772.589	#NULL!	#NULL!	-292.041	-766.505	-130.237	-608.894	#NULL!	#NULL!	526.032	-112.283	657.289	-402.712	#NULL!	#NULL!	-561.05	-676.897	-347.29	-750.431	#NULL!	#NULL!	662.354	-707.247	158.647	-736.22	#NULL!	#NULL!	-287.834	-183.506	-388.756	-535.508	#NULL!	#NULL!	347.59	-629.095
362.13	-467.848	162.762	-678.664	#NULL!	#NULL!	-401.727	-311.686	-165.778	-714.707	#NULL!	#NULL!	654.284	-401.073	585.227	-772.562	#NULL!	#NULL!	-296.969	-766.476	-116.038	-604.272	#NULL!	#NULL!	598.706	-111.485	619.127	-403.99	#NULL!	#NULL!	-566.395	-677.22	-412.548	-750.301	#NULL!	#NULL!	735.122	-705.071	153.723	-736.22	#NULL!	#NULL!	-255.101	-178.934	-269.343	-529.707	#NULL!	#NULL!	329.416	-628.581
473.993	-464.798	187.369	-676.428	#NULL!	#NULL!	-407.874	-312.05	-147.307	-710.111	#NULL!	#NULL!	523.89	-399.907	580.299	-772.535	#NULL!	#NULL!	-301.897	-766.447	-120.967	-604.245	#NULL!	#NULL!	580.556	-107.372	697.231	-402.114	#NULL!	#NULL!	-530.051	-675.298	-415.762	-751.311	#NULL!	#NULL!	730.189	-705.061	148.799	-736.22	#NULL!	#NULL!	-291.114	-179.637	-274.267	-529.707	#NULL!	#NULL!	342.646	-626.742
266.275	-463.966	183.68	-676.413	#NULL!	#NULL!	-412.791	-312.03	-152.226	-710.091	#NULL!	#NULL!	495.954	-401.307	575.986	-772.511	#NULL!	#NULL!	-306.826	-766.417	-125.895	-604.218	#NULL!	#NULL!	577.35	-107.363	707.942	-399.088	#NULL!	#NULL!	-546.082	-675.251	-281.666	-748.192	#NULL!	#NULL!	725.256	-705.052	143.876	-736.22	#NULL!	#NULL!	-246.089	-174.703	-279.191	-529.707	#NULL!	#NULL!	335.21	-626.69
261.973	-463.949	162.787	-673.994	#NULL!	#NULL!	-417.707	-312.01	-157.145	-710.072	#NULL!	#NULL!	477.473	-401.197	546.416	-772.351	#NULL!	#NULL!	-311.138	-766.392	-130.823	-604.192	#NULL!	#NULL!	526.053	-107.21	704.198	-399.081	#NULL!	#NULL!	-534.322	-674.271	-351.561	-748.391	#NULL!	#NULL!	720.323	-705.042	138.952	-736.22	#NULL!	#NULL!	-288.946	-174.619	-284.115	-529.707	#NULL!	#NULL!	353.813	-624.503
472.784	-460.13	187.806	-671.37	#NULL!	#NULL!	-422.623	-311.99	-161.45	-710.055	#NULL!	#NULL!	674.62	-400.02	518.694	-772.199	#NULL!	#NULL!	-323.662	-765.926	-116.009	-599.573	#NULL!	#NULL!	513.229	-107.172	690.29	-399.053	#NULL!	#NULL!	-549.283	-674.227	-380.981	-748.333	#NULL!	#NULL!	715.39	-705.033	134.028	-736.22	#NULL!	#NULL!	-246.798	-169.679	-289.038	-529.707	#NULL!	#NULL!	348.856	-624.468
268.753	-459.313	162.196	-669.322	#NULL!	#NULL!	-427.54	-311.971	-147.283	-705.441	#NULL!	#NULL!	661.067	-399.939	513.766	-772.173	#NULL!	#NULL!	-208.862	-764.65	-120.938	-599.546	#NULL!	#NULL!	543.699	-104.219	655.522	-398.984	#NULL!	#NULL!	-554.627	-674.211	-392.214	-748.311	#NULL!	#NULL!	710.457	-705.023	129.104	-736.22	#NULL!	#NULL!	-287.395	-170.373	-293.962	-529.707	#NULL!	#NULL!	329.026	-624.329
263.836	-459.294	188.648	-667.093	#NULL!	#NULL!	-432.456	-311.951	-152.202	-705.422	#NULL!	#NULL!	641.353	-399.822	508.838	-772.146	#NULL!	#NULL!	-242.745	-764.449	-125.866	-599.519	#NULL!	#NULL!	538.89	-104.204	651.242	-398.976	#NULL!	#NULL!	-557.828	-673.187	-401.842	-748.292	#NULL!	#NULL!	705.524	-705.013	125.416	-733.9	#NULL!	#NULL!	-246.085	-165.431	-298.27	-529.707	#NULL!	#NULL!	344.327	-621.732
260.144	-460.445	184.959	-667.078	#NULL!	#NULL!	-437.373	-311.931	-157.121	-705.402	#NULL!	#NULL!	491.038	-398.93	503.909	-772.119	#NULL!	#NULL!	-247.673	-764.42	-130.178	-599.496	#NULL!	#NULL!	522.855	-105.171	594.543	-398.863	#NULL!	#NULL!	-563.706	-673.169	-302.342	-746.458	#NULL!	#NULL!	701.822	-706.165	168.503	-731.579	#NULL!	#NULL!	-289.235	-165.347	-364.742	-529.707	#NULL!	#NULL!	337.715	-622.072
271.231	-454.66	162.836	-664.654	#NULL!	#NULL!	-442.289	-311.912	-161.412	-703.05	#NULL!	#NULL!	473.789	-398.827	498.981	-772.092	#NULL!	#NULL!	-282.172	-764.215	-118.444	-594.861	#NULL!	#NULL!	518.581	-105.159	591.342	-396.825	#NULL!	#NULL!	-566.382	-674.176	-338.715	-746.386	#NULL!	#NULL!	693.192	-704.603	163.579	-731.579	#NULL!	#NULL!	-228.795	-160.829	-370.283	-530.867	#NULL!	#NULL!	332.757	-622.037
266.314	-454.64	159.147	-664.639	#NULL!	#NULL!	-446.591	-311.894	-147.258	-700.771	#NULL!	#NULL!	470.093	-398.805	494.053	-772.065	#NULL!	#NULL!	-287.1	-764.186	-123.372	-594.834	#NULL!	#NULL!	508.967	-104.115	684.958	-394.98	#NULL!	#NULL!	-528.431	-671.245	-413.601	-746.237	#NULL!	#NULL!	687.025	-704.977	158.656	-731.579	#NULL!	#NULL!	-257.777	-160.773	-376.436	-529.707	#NULL!	#NULL!	352.593	-621.018
262.627	-454.626	187.443	-662.418	#NULL!	#NULL!	-399.251	-307.421	-152.177	-700.752	#NULL!	#NULL!	654.309	-396.376	490.356	-772.045	#NULL!	#NULL!	-213.162	-762.277	-127.069	-594.814	#NULL!	#NULL!	567.748	-103.276	653.399	-394.917	#NULL!	#NULL!	-546.065	-671.192	-415.745	-747.248	#NULL!	#NULL!	740.06	-702.763	153.732	-731.579	#NULL!	#NULL!	-289.842	-160.711	-381.36	-529.707	#NULL!	#NULL!	327.402	-619.296
271.25	-449.997	182.524	-662.398	#NULL!	#NULL!	-404.167	-307.401	-157.096	-700.732	#NULL!	#NULL!	637.676	-396.278	565.528	-770.105	#NULL!	#NULL!	-252.589	-762.042	-83.9309	-592.699	#NULL!	#NULL!	564.542	-103.266	649.12	-394.909	#NULL!	#NULL!	-524.687	-670.241	-279.866	-744.133	#NULL!	#NULL!	680.864	-702.261	148.808	-731.579	#NULL!	#NULL!	-226.935	-156.197	-385.055	-530.867	#NULL!	#NULL!	348.895	-617.515
266.334	-449.978	178.232	-660.046	#NULL!	#NULL!	-409.084	-307.382	-161.591	-697.99	#NULL!	#NULL!	521.859	-395.59	561.832	-770.085	#NULL!	#NULL!	-257.518	-762.013	-115.951	-590.175	#NULL!	#NULL!	558.139	-101.218	594.025	-394.799	#NULL!	#NULL!	-556.743	-669.131	-284.147	-744.463	#NULL!	#NULL!	675.313	-702.637	143.884	-731.579	#NULL!	#NULL!	-274.108	-156.106	-269.334	-525.066	#NULL!	#NULL!	343.938	-617.48
262.032	-449.96	162.861	-659.984	#NULL!	#NULL!	-414	-307.362	-146.619	-696.104	#NULL!	#NULL!	497.217	-395.444	550.743	-770.024	#NULL!	#NULL!	-262.446	-761.984	-122.93	-589.745	#NULL!	#NULL!	541.04	-101.167	687.65	-390.923	#NULL!	#NULL!	-561.018	-669.119	-351.544	-744.329	#NULL!	#NULL!	664.831	-702.616	138.96	-731.579	#NULL!	#NULL!	-227.754	-142.289	-274.258	-525.066	#NULL!	#NULL!	338.974	-618.604
314.274	-449.004	159.165	-661.137	#NULL!	#NULL!	-418.916	-307.342	-155.842	-696.067	#NULL!	#NULL!	484.896	-395.37	629.611	-768.104	#NULL!	#NULL!	-266.142	-761.962	-127.047	-591.289	#NULL!	#NULL!	503.636	-101.056	682.301	-390.912	#NULL!	#NULL!	-564.228	-670.124	-378.289	-744.276	#NULL!	#NULL!	735.132	-700.435	134.037	-731.579	#NULL!	#NULL!	-269.454	-142.208	-279.182	-525.066	#NULL!	#NULL!	334.023	-617.41
257.74	-447.612	187.468	-657.748	#NULL!	#NULL!	-423.218	-307.325	-161.978	-693.707	#NULL!	#NULL!	466.409	-396.435	624.683	-768.077	#NULL!	#NULL!	-292.016	-761.808	-117.153	-585.469	#NULL!	#NULL!	499.361	-101.043	678.556	-390.905	#NULL!	#NULL!	-521.472	-668.222	-392.197	-744.248	#NULL!	#NULL!	730.199	-700.426	129.113	-731.579	#NULL!	#NULL!	-225.787	-137.657	-284.106	-525.066	#NULL!	#NULL!	329.081	-614.672
271.27	-445.334	182.549	-657.728	#NULL!	#NULL!	-429.978	-307.298	-144.749	-691.441	#NULL!	#NULL!	648.777	-393.995	619.755	-768.051	#NULL!	#NULL!	-296.945	-761.779	-122.082	-585.442	#NULL!	#NULL!	495.091	-100.016	651.277	-390.851	#NULL!	#NULL!	-546.048	-667.134	-403.964	-744.225	#NULL!	#NULL!	725.266	-700.416	168.512	-726.938	#NULL!	#NULL!	-263.278	-137.584	-289.03	-525.066	#NULL!	#NULL!	323.502	-615.019
266.353	-445.315	172.711	-657.689	#NULL!	#NULL!	-434.895	-307.278	-157.053	-692.559	#NULL!	#NULL!	673.431	-391.793	614.827	-768.024	#NULL!	#NULL!	-301.873	-761.75	-126.394	-585.419	#NULL!	#NULL!	479.062	-99.6297	646.997	-390.842	#NULL!	#NULL!	-550.314	-665.092	-419.476	-744.194	#NULL!	#NULL!	720.333	-700.407	163.588	-726.938	#NULL!	#NULL!	-223.187	-133.027	-293.954	-525.066	#NULL!	#NULL!	347.682	-612.871
261.437	-445.295	177.642	-655.374	#NULL!	#NULL!	-439.811	-307.259	-161.339	-689.04	#NULL!	#NULL!	645.708	-391.628	609.898	-767.997	#NULL!	#NULL!	-306.801	-761.721	-118.354	-580.372	#NULL!	#NULL!	549.606	-97.134	643.788	-390.836	#NULL!	#NULL!	-554.588	-665.079	-300.185	-742.4	#NULL!	#NULL!	715.4	-700.397	158.664	-726.938	#NULL!	#NULL!	-217.559	-128.016	-297.646	-525.066	#NULL!	#NULL!	342.724	-612.836
258.374	-442.951	167.804	-655.334	#NULL!	#NULL!	-444.113	-307.241	-144.725	-686.771	#NULL!	#NULL!	634.004	-391.559	604.97	-767.97	#NULL!	#NULL!	-311.73	-761.691	-123.901	-580.733	#NULL!	#NULL!	490.829	-96.9591	687.132	-386.859	#NULL!	#NULL!	-558.329	-665.068	-338.698	-742.323	#NULL!	#NULL!	710.464	-701.546	153.74	-726.938	#NULL!	#NULL!	-241.877	-125.651	-363.502	-525.066	#NULL!	#NULL!	337.16	-610.479
462.416	-441.437	162.885	-655.314	#NULL!	#NULL!	-447.191	-308.395	-139.793	-684.456	#NULL!	#NULL!	519.413	-392.053	600.041	-767.943	#NULL!	#NULL!	-315.426	-761.669	-113.398	-576.091	#NULL!	#NULL!	483.348	-96.9368	682.318	-386.85	#NULL!	#NULL!	-546.031	-663.076	-276.641	-740.415	#NULL!	#NULL!	706.764	-701.539	148.817	-726.938	#NULL!	#NULL!	-205.902	-123.789	-380.12	-525.066	#NULL!	#NULL!	332.203	-610.444
267.602	-440.656	187.493	-653.078	#NULL!	#NULL!	-394.325	-305.109	-148.401	-684.422	#NULL!	#NULL!	493.545	-390.725	595.113	-767.917	#NULL!	#NULL!	-321.592	-762.807	-118.327	-576.064	#NULL!	#NULL!	466.254	-95.8713	678.038	-386.841	#NULL!	#NULL!	-550.297	-661.034	-281.994	-741.42	#NULL!	#NULL!	698.135	-699.977	143.893	-726.938	#NULL!	#NULL!	-237.654	-121.41	-383.813	-525.066	#NULL!	#NULL!	324.767	-610.392
262.686	-440.637	182.574	-653.058	#NULL!	#NULL!	-399.229	-302.369	-160.699	-684.372	#NULL!	#NULL!	483.688	-390.666	590.185	-767.89	#NULL!	#NULL!	-209.454	-759.95	-122.639	-576.041	#NULL!	#NULL!	543.211	-93.0565	674.294	-386.834	#NULL!	#NULL!	-554.037	-661.022	-352.062	-740.265	#NULL!	#NULL!	691.967	-700.351	138.969	-726.938	#NULL!	#NULL!	-205.738	-119.154	-269.325	-520.039	#NULL!	#NULL!	349.567	-608.248
458.125	-438.699	173.959	-654.191	#NULL!	#NULL!	-405.377	-302.733	-144.085	-682.104	#NULL!	#NULL!	467.671	-390.571	585.256	-767.863	#NULL!	#NULL!	-217.666	-759.51	-110.905	-571.406	#NULL!	#NULL!	469.472	-92.837	643.805	-386.773	#NULL!	#NULL!	-518.232	-660.114	-377.202	-740.215	#NULL!	#NULL!	687.034	-700.342	134.045	-726.938	#NULL!	#NULL!	-232.588	-116.784	-275.481	-520.426	#NULL!	#NULL!	343.99	-608.209
257.779	-438.286	180.126	-650.713	#NULL!	#NULL!	-410.293	-302.714	-155.768	-682.057	#NULL!	#NULL!	515.729	-389.682	580.328	-767.836	#NULL!	#NULL!	-242.72	-759.753	-115.833	-571.379	#NULL!	#NULL!	465.202	-91.8097	640.061	-386.766	#NULL!	#NULL!	-547.082	-659.014	-391.645	-740.187	#NULL!	#NULL!	738.837	-698.125	129.737	-726.938	#NULL!	#NULL!	-195.4	-114.538	-280.404	-520.426	#NULL!	#NULL!	337.186	-605.843
451.373	-436.729	170.288	-650.674	#NULL!	#NULL!	-415.209	-302.694	-139.769	-679.786	#NULL!	#NULL!	672.223	-387.089	576.016	-767.812	#NULL!	#NULL!	-247.649	-759.723	-120.762	-571.352	#NULL!	#NULL!	459.854	-92.8084	685.544	-382.794	#NULL!	#NULL!	-557.235	-658.984	-419.994	-740.13	#NULL!	#NULL!	680.874	-697.626	168.52	-722.298	#NULL!	#NULL!	-231.16	-112.151	-285.328	-520.426	#NULL!	#NULL!	329.546	-605.404
309.407	-437.327	165.984	-650.657	#NULL!	#NULL!	-420.126	-302.674	-160.674	-679.702	#NULL!	#NULL!	626.629	-387.993	547.678	-767.658	#NULL!	#NULL!	-282.147	-759.519	-110.26	-566.71	#NULL!	#NULL!	472.687	-90.8173	681.265	-382.785	#NULL!	#NULL!	-498.975	-655.099	-292.678	-738.013	#NULL!	#NULL!	677.17	-699.164	163.597	-722.298	#NULL!	#NULL!	-196.089	-109.515	-290.252	-520.426	#NULL!	#NULL!	322.934	-605.743
266.393	-435.989	189.979	-648.029	#NULL!	#NULL!	-422.589	-303.83	-142.831	-677.439	#NULL!	#NULL!	621.701	-387.963	521.188	-767.514	#NULL!	#NULL!	-287.076	-759.489	-115.804	-566.68	#NULL!	#NULL!	534.679	-88.9726	676.986	-382.777	#NULL!	#NULL!	-503.25	-655.086	-298.029	-738.341	#NULL!	#NULL!	732.675	-695.795	158.673	-722.298	#NULL!	#NULL!	-223.956	-107.143	-295.176	-520.426	#NULL!	#NULL!	347.727	-604.758
261.476	-435.969	183.828	-648.393	#NULL!	#NULL!	-431.188	-302.63	-156.973	-677.382	#NULL!	#NULL!	611.844	-387.905	516.259	-767.487	#NULL!	#NULL!	-252.565	-757.346	-120.117	-566.656	#NULL!	#NULL!	496.206	-88.8581	673.241	-382.769	#NULL!	#NULL!	-541.721	-654.633	-300.172	-739.353	#NULL!	#NULL!	727.742	-695.785	153.749	-722.298	#NULL!	#NULL!	-179.348	-105.298	-299.484	-520.426	#NULL!	#NULL!	344.029	-601.256
247.342	-435.912	169.083	-645.999	#NULL!	#NULL!	-436.104	-302.61	-143.829	-672.375	#NULL!	#NULL!	606.306	-386.698	511.331	-767.46	#NULL!	#NULL!	-258.725	-757.309	-110.847	-562.008	#NULL!	#NULL!	455.597	-88.7372	641.682	-382.707	#NULL!	#NULL!	-547.07	-655.97	-338.146	-738.262	#NULL!	#NULL!	722.809	-695.776	148.825	-722.298	#NULL!	#NULL!	-215.315	-103.297	-360.416	-520.426	#NULL!	#NULL!	336.595	-600.817
454.456	-434.41	166.618	-647.157	#NULL!	#NULL!	-441.026	-303.756	-156.948	-672.712	#NULL!	#NULL!	512.051	-386.138	506.403	-767.433	#NULL!	#NULL!	-263.654	-757.28	-115.775	-561.981	#NULL!	#NULL!	429.948	-88.6609	637.938	-382.699	#NULL!	#NULL!	-556.149	-654.928	-276.624	-736.353	#NULL!	#NULL!	717.876	-695.766	143.901	-722.298	#NULL!	#NULL!	-171.939	-100.677	-365.34	-520.426	#NULL!	#NULL!	331.016	-601.164
257.799	-433.623	192.461	-643.758	#NULL!	#NULL!	-426.262	-300.318	-161.24	-670.36	#NULL!	#NULL!	489.873	-386.006	501.474	-767.407	#NULL!	#NULL!	-268.582	-757.251	-110.817	-557.309	#NULL!	#NULL!	472.704	-86.7589	684.487	-379.745	#NULL!	#NULL!	-510.188	-653.036	-349.37	-736.208	#NULL!	#NULL!	713.559	-695.758	138.978	-722.298	#NULL!	#NULL!	-204.616	-98.2958	-380.112	-520.426	#NULL!	#NULL!	322.136	-600.716
448.731	-431.667	187.542	-643.738	#NULL!	#NULL!	-396.753	-298.105	-139.705	-667.722	#NULL!	#NULL!	480.01	-387.122	496.546	-767.38	#NULL!	#NULL!	-291.992	-757.112	-115.746	-557.282	#NULL!	#NULL!	466.292	-86.7398	675.929	-379.728	#NULL!	#NULL!	-514.462	-653.023	-377.185	-736.153	#NULL!	#NULL!	703.077	-695.737	134.054	-722.298	#NULL!	#NULL!	-166.996	-96.0512	-383.805	-520.426	#NULL!	#NULL!	344.048	-597.779
266.413	-431.326	182.623	-643.718	#NULL!	#NULL!	-401.67	-298.085	-145.856	-668.087	#NULL!	#NULL!	460.303	-385.831	491.618	-767.353	#NULL!	#NULL!	-296.92	-757.082	-120.043	-554.909	#NULL!	#NULL!	513.322	-84.8506	672.189	-378.705	#NULL!	#NULL!	-552.4	-652.91	-389.488	-736.128	#NULL!	#NULL!	698.143	-695.728	130.361	-722.298	#NULL!	#NULL!	-201.699	-93.2796	-264.394	-515.785	#NULL!	#NULL!	337.858	-596.577
261.496	-431.306	167.878	-641.324	#NULL!	#NULL!	-406.586	-298.065	-152.004	-668.062	#NULL!	#NULL!	616.785	-385.586	572.334	-765.443	#NULL!	#NULL!	-301.849	-757.053	-110.172	-552.613	#NULL!	#NULL!	505.85	-82.7991	632.067	-379.64	#NULL!	#NULL!	-537.43	-650.926	-419.982	-737.083	#NULL!	#NULL!	693.21	-695.718	168.529	-717.657	#NULL!	#NULL!	-162.67	-91.424	-269.317	-515.785	#NULL!	#NULL!	331.662	-596.533
249.207	-430.868	164.189	-641.309	#NULL!	#NULL!	-411.502	-298.046	-156.923	-668.042	#NULL!	#NULL!	476.326	-384.752	561.854	-766.561	#NULL!	#NULL!	-306.777	-757.024	-115.716	-552.583	#NULL!	#NULL!	501.575	-82.7864	671.671	-374.641	#NULL!	#NULL!	-540.636	-650.916	-290.523	-734.294	#NULL!	#NULL!	688.277	-695.709	163.605	-717.657	#NULL!	#NULL!	-196.457	-89.0405	-274.241	-515.785	#NULL!	#NULL!	326.704	-596.498
243.674	-431.235	191.256	-639.083	#NULL!	#NULL!	-416.419	-298.026	-166.147	-668.005	#NULL!	#NULL!	471.404	-383.548	526.131	-765.191	#NULL!	#NULL!	-311.705	-756.995	-119.398	-550.213	#NULL!	#NULL!	498.378	-80.7476	668.461	-374.635	#NULL!	#NULL!	-495.743	-649.02	-294.802	-734.285	#NULL!	#NULL!	736.38	-693.484	158.681	-717.657	#NULL!	#NULL!	-162.661	-86.7884	-279.165	-515.785	#NULL!	#NULL!	322.986	-596.472
256.591	-428.566	186.337	-639.063	#NULL!	#NULL!	-420.721	-298.009	-161.828	-665.298	#NULL!	#NULL!	668.551	-382.37	487.32	-764.98	#NULL!	#NULL!	-315.402	-756.973	-110.143	-547.914	#NULL!	#NULL!	433.192	-79.539	629.957	-372.527	#NULL!	#NULL!	-513.911	-648.966	-299.081	-734.277	#NULL!	#NULL!	708.015	-693.043	153.758	-717.657	#NULL!	#NULL!	-195.778	-84.4062	-284.089	-515.785	#NULL!	#NULL!	329.209	-591.88
448.34	-427.391	181.418	-639.043	#NULL!	#NULL!	-431.168	-297.967	-140.912	-663.436	#NULL!	#NULL!	648.831	-383.428	627.177	-763.392	#NULL!	#NULL!	-213.742	-755.228	-115.687	-547.884	#NULL!	#NULL!	395.784	-80.4423	668.478	-370.572	#NULL!	#NULL!	-551.315	-648.855	-302.826	-734.269	#NULL!	#NULL!	683.35	-692.995	148.834	-717.657	#NULL!	#NULL!	-163.198	-81.7654	-289.012	-515.785	#NULL!	#NULL!	324.252	-591.846
295.932	-426.392	176.499	-639.024	#NULL!	#NULL!	-435.47	-297.95	-145.831	-663.417	#NULL!	#NULL!	641.439	-383.384	622.248	-763.365	#NULL!	#NULL!	-242.696	-755.056	-119.369	-545.514	#NULL!	#NULL!	494.111	-78.7057	591.453	-370.419	#NULL!	#NULL!	-533.673	-646.878	-335.455	-734.205	#NULL!	#NULL!	677.183	-693.369	143.91	-717.657	#NULL!	#NULL!	-195.328	-79.7714	-293.936	-515.785	#NULL!	#NULL!	319.914	-591.815
289.785	-426.756	171.58	-639.004	#NULL!	#NULL!	-426.242	-295.655	-150.135	-663.399	#NULL!	#NULL!	636.516	-382.18	617.32	-763.338	#NULL!	#NULL!	-247.624	-755.027	-110.729	-543.212	#NULL!	#NULL!	488.781	-75.6459	628.904	-368.462	#NULL!	#NULL!	-542.222	-646.853	-416.224	-734.044	#NULL!	#NULL!	672.249	-693.36	138.986	-717.657	#NULL!	#NULL!	-151.177	-77.9258	-298.86	-515.785	#NULL!	#NULL!	333.56	-589.593
268.892	-426.284	255.83	-637.007	#NULL!	#NULL!	-394.275	-293.452	-154.445	-664.549	#NULL!	#NULL!	603.244	-383.157	612.392	-763.311	#NULL!	#NULL!	-282.121	-754.43	-115.658	-543.185	#NULL!	#NULL!	426.793	-76.4761	671.705	-366.516	#NULL!	#NULL!	-544.898	-647.86	-276.607	-732.29	#NULL!	#NULL!	668.549	-693.352	134.062	-717.657	#NULL!	#NULL!	-180.982	-75.1637	-360.407	-515.398	#NULL!	#NULL!	326.756	-587.227
262.745	-426.648	165.446	-636.255	#NULL!	#NULL!	-399.192	-293.432	-167.352	-663.33	#NULL!	#NULL!	557.663	-381.712	607.463	-763.285	#NULL!	#NULL!	-288.283	-754.785	-119.339	-540.815	#NULL!	#NULL!	422.518	-76.4633	667.426	-366.508	#NULL!	#NULL!	-492.52	-644.972	-345.074	-732.154	#NULL!	#NULL!	658.683	-693.333	130.369	-717.657	#NULL!	#NULL!	-149.887	-72.5201	-364.103	-516.945	#NULL!	#NULL!	321.799	-587.192
249.225	-426.594	161.748	-637.797	#NULL!	#NULL!	-404.108	-293.412	-161.812	-662.185	#NULL!	#NULL!	510.843	-381.434	602.535	-763.258	#NULL!	#NULL!	-251.315	-753.831	-110.7	-538.513	#NULL!	#NULL!	413.973	-75.4233	664.216	-366.501	#NULL!	#NULL!	-510.688	-644.918	-375.029	-732.095	#NULL!	#NULL!	730.63	-690.769	168.538	-713.016	#NULL!	#NULL!	-176.193	-70.5374	-379.692	-515.398	#NULL!	#NULL!	318.081	-587.166
245.532	-427.745	187.591	-634.398	#NULL!	#NULL!	-409.025	-293.393	-141.502	-658.764	#NULL!	#NULL!	488.666	-381.302	597.606	-763.231	#NULL!	#NULL!	-259.931	-752.214	-115.629	-538.486	#NULL!	#NULL!	443.901	-74.4977	625.699	-367.44	#NULL!	#NULL!	-549.16	-644.803	-386.796	-732.071	#NULL!	#NULL!	724.052	-691.143	163.614	-713.016	#NULL!	#NULL!	-146.178	-67.8917	-383.798	-516.945	#NULL!	#NULL!	336.686	-584.593
443.435	-424.651	182.672	-634.378	#NULL!	#NULL!	-413.941	-293.373	-166.718	-659.83	#NULL!	#NULL!	456.625	-382.286	592.678	-763.204	#NULL!	#NULL!	-266.094	-752.568	-119.31	-536.116	#NULL!	#NULL!	482.381	-72.583	621.424	-366.416	#NULL!	#NULL!	-498.928	-643.938	-293.715	-730.225	#NULL!	#NULL!	719.119	-691.133	158.69	-713.016	#NULL!	#NULL!	-176.018	-65.5159	-301.933	-513.465	#NULL!	#NULL!	330.488	-584.936
303.93	-424.481	177.753	-634.359	#NULL!	#NULL!	-418.858	-293.353	-141.453	-649.424	#NULL!	#NULL!	652.546	-379.927	587.75	-763.177	#NULL!	#NULL!	-271.022	-752.539	-110.055	-533.817	#NULL!	#NULL!	478.107	-72.5703	616.61	-366.407	#NULL!	#NULL!	-530.989	-643.842	-296.929	-731.234	#NULL!	#NULL!	714.186	-691.123	153.766	-713.016	#NULL!	#NULL!	-135.481	-63.6632	-268.078	-511.144	#NULL!	#NULL!	324.306	-582.188
257.838	-424.297	172.834	-634.339	#NULL!	#NULL!	-431.147	-292.916	-148.216	-649.397	#NULL!	#NULL!	645.147	-381.057	582.822	-763.15	#NULL!	#NULL!	-275.95	-752.51	-115.599	-533.787	#NULL!	#NULL!	473.832	-72.5576	590.4	-366.355	#NULL!	#NULL!	-535.263	-643.83	-301.208	-731.226	#NULL!	#NULL!	700.62	-690.711	148.842	-713.016	#NULL!	#NULL!	-164.828	-61.2883	-273.002	-511.144	#NULL!	#NULL!	318.727	-582.535
298.409	-422.128	258.929	-632.349	#NULL!	#NULL!	-434.841	-294.455	-142.041	-644.362	#NULL!	#NULL!	622.976	-379.751	577.893	-763.124	#NULL!	#NULL!	-294.43	-752.009	-119.281	-531.417	#NULL!	#NULL!	469.557	-72.5449	670.652	-362.452	#NULL!	#NULL!	-543.274	-642.791	-334.368	-730.144	#NULL!	#NULL!	694.453	-691.085	143.919	-713.016	#NULL!	#NULL!	-136.88	-58.6386	-277.925	-511.144	#NULL!	#NULL!	335.471	-580.335
293.492	-422.108	254.01	-632.33	#NULL!	#NULL!	-423.764	-291.002	-148.192	-644.727	#NULL!	#NULL!	599.56	-380.786	521.22	-762.423	#NULL!	#NULL!	-300.592	-752.364	-110.025	-529.118	#NULL!	#NULL!	465.283	-72.5321	666.908	-362.444	#NULL!	#NULL!	-488.233	-641.94	-369.671	-730.074	#NULL!	#NULL!	689.52	-691.075	138.995	-713.016	#NULL!	#NULL!	-163.889	-56.2683	-282.849	-511.144	#NULL!	#NULL!	331.746	-581.468
288.576	-422.088	166.698	-631.979	#NULL!	#NULL!	-394.256	-288.789	-151.881	-644.712	#NULL!	#NULL!	594.631	-380.757	515.057	-762.781	#NULL!	#NULL!	-305.52	-752.334	-115.57	-529.088	#NULL!	#NULL!	422.548	-69.3611	616.088	-363.359	#NULL!	#NULL!	-510.675	-641.874	-408.184	-729.997	#NULL!	#NULL!	654.372	-691.007	134.071	-713.016	#NULL!	#NULL!	-127.565	-54.0211	-287.773	-511.144	#NULL!	#NULL!	324.33	-577.939
283.659	-422.069	162.394	-631.962	#NULL!	#NULL!	-399.172	-288.769	-139.559	-640.091	#NULL!	#NULL!	589.709	-379.554	510.128	-762.755	#NULL!	#NULL!	-310.449	-752.305	-119.252	-526.718	#NULL!	#NULL!	407.582	-70.3312	669.599	-358.387	#NULL!	#NULL!	-526.167	-640.813	-414.245	-729.647	#NULL!	#NULL!	638.953	-692.136	130.378	-713.016	#NULL!	#NULL!	-152.722	-51.6544	-292.697	-511.144	#NULL!	#NULL!	319.373	-577.904
278.743	-422.049	190.075	-629.738	#NULL!	#NULL!	-404.089	-288.749	-144.484	-641.239	#NULL!	#NULL!	552.74	-380.509	505.2	-762.728	#NULL!	#NULL!	-315.377	-752.276	-110.612	-524.416	#NULL!	#NULL!	403.308	-70.3184	655.696	-357.344	#NULL!	#NULL!	-539.525	-640.773	-274.985	-728.231	#NULL!	#NULL!	737.624	-688.465	168.546	-708.376	#NULL!	#NULL!	-109.827	-49.8063	-297.621	-511.144	#NULL!	#NULL!	334.258	-575.691
273.827	-422.029	185.156	-629.718	#NULL!	#NULL!	-409.005	-288.73	-148.173	-641.224	#NULL!	#NULL!	470.196	-378.844	500.272	-762.701	#NULL!	#NULL!	-215.565	-750.52	-105.669	-522.093	#NULL!	#NULL!	400.102	-70.3089	613.979	-355.907	#NULL!	#NULL!	-548.609	-640.746	-341.49	-727.76	#NULL!	#NULL!	708.025	-688.407	163.622	-708.376	#NULL!	#NULL!	-145.108	-47.4199	-355.476	-511.144	#NULL!	#NULL!	329.3	-575.656
268.91	-422.01	180.852	-629.701	#NULL!	#NULL!	-413.921	-288.71	-137.075	-635.431	#NULL!	#NULL!	452.947	-378.742	495.343	-762.674	#NULL!	#NULL!	-242.669	-749.968	-108.735	-519.727	#NULL!	#NULL!	456.75	-68.4483	610.764	-357.254	#NULL!	#NULL!	-475.395	-638.597	-385.175	-728.012	#NULL!	#NULL!	683.359	-688.359	158.699	-708.376	#NULL!	#NULL!	-111.598	-44.781	-360.399	-511.144	#NULL!	#NULL!	315.048	-575.556
263.994	-421.99	261.415	-627.3	#NULL!	#NULL!	-418.838	-288.69	-140.764	-635.417	#NULL!	#NULL!	667.343	-377.666	490.415	-762.647	#NULL!	#NULL!	-248.832	-750.323	-114.688	-519.303	#NULL!	#NULL!	371.26	-67.1792	669.616	-354.324	#NULL!	#NULL!	-478.606	-639.94	-294.768	-726.16	#NULL!	#NULL!	677.192	-688.734	153.775	-708.376	#NULL!	#NULL!	-104.875	-40.5447	-375.171	-511.144	#NULL!	#NULL!	324.356	-573.303
248.63	-421.928	255.264	-627.664	#NULL!	#NULL!	-428.056	-288.654	-137.665	-630.759	#NULL!	#NULL!	610.667	-377.33	572.982	-760.356	#NULL!	#NULL!	-282.096	-749.734	-110.554	-515.018	#NULL!	#NULL!	447.14	-66.3904	616.136	-351.848	#NULL!	#NULL!	-491.43	-639.902	-334.351	-726.082	#NULL!	#NULL!	672.259	-688.724	148.851	-708.376	#NULL!	#NULL!	-134.816	-40.4865	-380.094	-511.144	#NULL!	#NULL!	319.399	-573.269
445.911	-420.387	250.96	-627.647	#NULL!	#NULL!	-423.743	-285.951	-137.024	-625.702	#NULL!	#NULL!	570.624	-377.092	568.051	-760.72	#NULL!	#NULL!	-288.259	-750.088	-114.866	-514.994	#NULL!	#NULL!	407.599	-66.2727	611.321	-352.177	#NULL!	#NULL!	-535.246	-639.771	-370.189	-726.01	#NULL!	#NULL!	667.326	-688.714	143.927	-708.376	#NULL!	#NULL!	-83.9916	-35.5635	-383.787	-511.144	#NULL!	#NULL!	334.284	-571.055
441.609	-420.37	165.493	-627.304	#NULL!	#NULL!	-391.776	-283.747	-140.721	-627.244	#NULL!	#NULL!	562.609	-378.219	484.272	-759.872	#NULL!	#NULL!	-219.25	-748.15	-106.843	-512.688	#NULL!	#NULL!	391.569	-66.225	645.028	-350.213	#NULL!	#NULL!	-543.792	-638.731	-406.027	-725.939	#NULL!	#NULL!	662.393	-688.705	139.003	-708.376	#NULL!	#NULL!	-119.831	-35.88	-303.771	-508.824	#NULL!	#NULL!	329.326	-571.02
302.106	-419.811	161.804	-627.29	#NULL!	#NULL!	-397.923	-284.111	-134.541	-621.431	#NULL!	#NULL!	547.824	-378.131	480.565	-761.419	#NULL!	#NULL!	-266.069	-747.872	-112.996	-511.48	#NULL!	#NULL!	379.814	-66.19	641.814	-351.222	#NULL!	#NULL!	-517.07	-637.796	-409.237	-725.933	#NULL!	#NULL!	657.46	-688.695	134.079	-708.376	#NULL!	#NULL!	-47.1929	-31.3857	-269.3	-506.503	#NULL!	#NULL!	314.454	-570.916
259.087	-419.639	188.87	-625.063	#NULL!	#NULL!	-402.225	-284.094	-139.46	-621.412	#NULL!	#NULL!	542.896	-378.102	624.742	-758.679	#NULL!	#NULL!	-270.998	-747.843	-104.349	-508.003	#NULL!	#NULL!	376.608	-66.1805	666.432	-348.224	#NULL!	#NULL!	-528.822	-636.746	-414.586	-725.922	#NULL!	#NULL!	648.827	-688.292	130.387	-708.376	#NULL!	#NULL!	-80.6793	-31.3206	-274.224	-506.503	#NULL!	#NULL!	310.736	-570.89
254.171	-419.619	183.951	-625.043	#NULL!	#NULL!	-406.532	-285.242	-132.057	-616.771	#NULL!	#NULL!	537.967	-378.072	619.813	-758.653	#NULL!	#NULL!	-275.926	-747.813	-109.894	-507.972	#NULL!	#NULL!	410.814	-64.2531	620.789	-347.795	#NULL!	#NULL!	-540.577	-636.712	-272.829	-724.173	#NULL!	#NULL!	730.844	-686.52	167.324	-703.735	#NULL!	#NULL!	-110.657	-31.6486	-279.148	-506.503	#NULL!	#NULL!	324.382	-568.668
295.97	-417.455	181.486	-626.201	#NULL!	#NULL!	-412.673	-284.052	-136.976	-616.751	#NULL!	#NULL!	534.271	-378.05	614.885	-758.626	#NULL!	#NULL!	-300.568	-747.667	-106.784	-503.29	#NULL!	#NULL!	404.406	-63.2194	617.217	-349.142	#NULL!	#NULL!	-546.989	-636.692	-282.992	-724.152	#NULL!	#NULL!	720.359	-687.659	162.4	-703.735	#NULL!	#NULL!	-92.8557	-26.6613	-284.072	-506.503	#NULL!	#NULL!	320.658	-569.801
291.054	-417.435	263.891	-624.197	#NULL!	#NULL!	-417.589	-284.032	-140.038	-614.404	#NULL!	#NULL!	525.653	-376.825	609.957	-758.599	#NULL!	#NULL!	-304.88	-747.641	-111.097	-503.267	#NULL!	#NULL!	437.543	-61.2888	610.803	-348.114	#NULL!	#NULL!	-472.173	-634.886	-286.201	-724.146	#NULL!	#NULL!	714.195	-686.488	157.476	-703.735	#NULL!	#NULL!	-18.6479	-24.1016	-288.995	-506.503	#NULL!	#NULL!	334.31	-566.42
286.752	-417.418	257.749	-623.004	#NULL!	#NULL!	-423.313	-281.289	-149.261	-614.367	#NULL!	#NULL!	485.61	-376.587	605.028	-758.572	#NULL!	#NULL!	-307.966	-748.797	-109.219	-498.578	#NULL!	#NULL!	407.616	-62.2143	606.523	-348.105	#NULL!	#NULL!	-477.521	-635.885	-339.691	-724.04	#NULL!	#NULL!	700.63	-686.075	152.552	-703.735	#NULL!	#NULL!	-65.7448	-22.0784	-293.919	-506.503	#NULL!	#NULL!	329.353	-566.385
278.764	-416.997	252.83	-622.985	#NULL!	#NULL!	-428.646	-282.822	-129.573	-612.111	#NULL!	#NULL!	651.954	-375.226	600.1	-758.545	#NULL!	#NULL!	-215.541	-745.823	-112.915	-498.558	#NULL!	#NULL!	363.8	-62.0839	601.898	-345.726	#NULL!	#NULL!	-521.337	-635.754	-381.413	-723.957	#NULL!	#NULL!	694.463	-686.449	147.629	-703.735	#NULL!	#NULL!	-92.4761	-22.0264	-298.843	-506.503	#NULL!	#NULL!	316.961	-565.912
272.617	-417.361	248.525	-622.967	#NULL!	#NULL!	-389.298	-279.094	-134.492	-612.091	#NULL!	#NULL!	631.625	-375.106	595.172	-758.519	#NULL!	#NULL!	-235.255	-745.706	-77.1556	-494.053	#NULL!	#NULL!	380.908	-60.1056	665.375	-345.175	#NULL!	#NULL!	-525.064	-632.699	-293.147	-722.101	#NULL!	#NULL!	689.53	-686.44	142.705	-703.735	#NULL!	#NULL!	6.96613	-19.9021	-355.056	-506.117	#NULL!	#NULL!	311.995	-567.422
267.701	-417.342	163.058	-622.625	#NULL!	#NULL!	-395.445	-279.458	-144.33	-612.052	#NULL!	#NULL!	624.232	-375.062	590.243	-758.492	#NULL!	#NULL!	-240.183	-745.677	-107.958	-493.885	#NULL!	#NULL!	343.508	-58.9796	625.797	-344.081	#NULL!	#NULL!	-527.74	-633.706	-334.869	-722.018	#NULL!	#NULL!	740.099	-684.22	137.781	-703.735	#NULL!	#NULL!	-33.2329	-19.8239	-359.162	-507.664	#NULL!	#NULL!	324.408	-564.032
262.784	-417.322	187.665	-620.388	#NULL!	#NULL!	-400.362	-279.438	-152.938	-612.017	#NULL!	#NULL!	586.031	-376.009	585.315	-758.465	#NULL!	#NULL!	-245.111	-745.648	-112.886	-493.859	#NULL!	#NULL!	426.87	-58.2131	631.154	-342.06	#NULL!	#NULL!	-537.354	-632.663	-371.777	-721.945	#NULL!	#NULL!	735.166	-684.211	132.857	-703.735	#NULL!	#NULL!	-75.3651	-17.4241	-375.162	-506.503	#NULL!	#NULL!	334.336	-561.784
249.675	-416.881	182.746	-620.369	#NULL!	#NULL!	-402.825	-280.594	-139.399	-609.737	#NULL!	#NULL!	576.181	-374.777	580.387	-758.438	#NULL!	#NULL!	-250.04	-745.619	-105.464	-489.2	#NULL!	#NULL!	418.32	-58.1877	599.06	-341.997	#NULL!	#NULL!	-472.16	-631.842	-406.015	-722.893	#NULL!	#NULL!	708.034	-683.772	130.393	-704.895	#NULL!	#NULL!	10.5581	-15.2735	-380.086	-506.503	#NULL!	#NULL!	329.379	-561.749
442.243	-415.709	256.543	-618.329	#NULL!	#NULL!	-416.34	-279.374	-149.237	-609.697	#NULL!	#NULL!	566.318	-375.892	520.63	-758.112	#NULL!	#NULL!	-284.536	-745.022	-109.168	-490.354	#NULL!	#NULL!	411.921	-55.1248	594.781	-341.988	#NULL!	#NULL!	-486.053	-631.801	-414.034	-721.861	#NULL!	#NULL!	683.369	-683.724	166.101	-699.094	#NULL!	#NULL!	-29.729	-15.1951	-383.781	-507.664	#NULL!	#NULL!	319.464	-561.68
300.896	-415.143	251.625	-618.31	#NULL!	#NULL!	-420.632	-277.026	-129.548	-607.441	#NULL!	#NULL!	530.587	-375.68	516.311	-759.264	#NULL!	#NULL!	-289.467	-745.385	-102.971	-484.514	#NULL!	#NULL!	332.834	-55.904	627.418	-340.022	#NULL!	#NULL!	-535.2	-628.611	-273.347	-720.109	#NULL!	#NULL!	677.202	-684.098	161.178	-699.094	#NULL!	#NULL!	71.8133	-14.2337	-303.762	-504.183	#NULL!	#NULL!	314.507	-561.645
255.419	-414.961	247.935	-618.295	#NULL!	#NULL!	-384.362	-274.451	-134.467	-607.421	#NULL!	#NULL!	521.962	-375.629	510.158	-758.056	#NULL!	#NULL!	-267.277	-743.168	-107.283	-484.491	#NULL!	#NULL!	328.56	-55.8913	592.115	-339.952	#NULL!	#NULL!	-472.139	-626.769	-284.045	-720.088	#NULL!	#NULL!	672.885	-684.09	156.254	-699.094	#NULL!	#NULL!	-67.5455	-13.19	-307.455	-504.183	#NULL!	#NULL!	310.789	-561.619
437.337	-413.358	163.083	-617.955	#NULL!	#NULL!	-390.509	-274.815	-144.305	-607.382	#NULL!	#NULL!	507.183	-374.367	505.229	-758.029	#NULL!	#NULL!	-272.205	-743.139	-95.5564	-481.03	#NULL!	#NULL!	325.353	-55.8817	630.101	-337.996	#NULL!	#NULL!	-478.551	-626.75	-288.328	-721.095	#NULL!	#NULL!	659.936	-684.064	151.33	-699.094	#NULL!	#NULL!	32.3556	-10.6803	-269.291	-501.863	#NULL!	#NULL!	323.195	-559.388
295.991	-412.403	187.69	-615.718	#NULL!	#NULL!	-395.426	-274.795	-152.92	-608.515	#NULL!	#NULL!	466.518	-375.3	500.301	-758.002	#NULL!	#NULL!	-277.14	-744.284	-101.71	-479.822	#NULL!	#NULL!	320.023	-52.822	595.868	-337.928	#NULL!	#NULL!	-520.23	-626.626	-339.674	-719.977	#NULL!	#NULL!	655.619	-684.056	146.406	-699.094	#NULL!	#NULL!	-25.6085	-10.5675	-274.215	-501.863	#NULL!	#NULL!	334.356	-558.307
289.844	-412.767	182.771	-615.699	#NULL!	#NULL!	-400.342	-274.775	-139.372	-604.678	#NULL!	#NULL!	462.212	-374.1	495.373	-757.975	#NULL!	#NULL!	-301.775	-742.963	-106.638	-479.795	#NULL!	#NULL!	294.909	-52.7473	591.597	-335.888	#NULL!	#NULL!	-523.436	-626.616	-378.187	-719.901	#NULL!	#NULL!	652.534	-685.209	141.482	-699.094	#NULL!	#NULL!	-53.3524	-8.19571	-279.139	-501.863	#NULL!	#NULL!	328.165	-557.105
284.928	-412.748	178.467	-615.681	#NULL!	#NULL!	-404.029	-274.76	-147.367	-605.035	#NULL!	#NULL!	450.507	-374.03	490.444	-757.948	#NULL!	#NULL!	-325.185	-742.824	-109.109	-480.957	#NULL!	#NULL!	400.178	-52.0459	629.049	-333.931	#NULL!	#NULL!	-496.709	-624.328	-401.723	-719.854	#NULL!	#NULL!	730.237	-681.883	136.559	-699.094	#NULL!	#NULL!	50.8644	-6.08067	-284.063	-501.863	#NULL!	#NULL!	317.011	-557.027
280.011	-412.728	256.57	-613.27	#NULL!	#NULL!	-416.319	-274.323	-127.064	-602.781	#NULL!	#NULL!	666.751	-372.966	476.894	-757.483	#NULL!	#NULL!	-214.285	-741.134	-100.448	-475.13	#NULL!	#NULL!	390.568	-49.9881	594.815	-333.863	#NULL!	#NULL!	-527.706	-625.589	-276.552	-719.087	#NULL!	#NULL!	725.921	-681.875	131.635	-699.094	#NULL!	#NULL!	-33.8199	-5.52961	-288.987	-501.863	#NULL!	#NULL!	312.054	-556.992
275.095	-412.708	250.419	-613.635	#NULL!	#NULL!	-379.426	-269.807	-131.983	-602.761	#NULL!	#NULL!	582.347	-373.639	575.473	-756.062	#NULL!	#NULL!	-235.23	-741.01	-105.377	-475.103	#NULL!	#NULL!	387.362	-49.9786	649.383	-331.94	#NULL!	#NULL!	-533.58	-624.557	-335.387	-717.955	#NULL!	#NULL!	700.639	-681.439	168.572	-694.453	#NULL!	#NULL!	66.9066	-1.47627	-293.911	-501.863	#NULL!	#NULL!	308.336	-556.966
270.179	-412.688	245.5	-613.615	#NULL!	#NULL!	-385.573	-270.171	-136.89	-600.407	#NULL!	#NULL!	555.241	-373.478	570.544	-756.035	#NULL!	#NULL!	-240.159	-740.98	-109.073	-475.083	#NULL!	#NULL!	331.791	-49.8132	646.174	-331.934	#NULL!	#NULL!	-473.19	-622.369	-370.69	-717.885	#NULL!	#NULL!	694.472	-681.814	163.648	-694.453	#NULL!	#NULL!	-39.1553	-1.26992	-298.834	-501.863	#NULL!	#NULL!	321.984	-554.357
265.262	-412.669	172.945	-613.324	#NULL!	#NULL!	-390.49	-270.152	-141.809	-600.387	#NULL!	#NULL!	550.313	-373.449	565.616	-756.008	#NULL!	#NULL!	-245.087	-740.951	-95.5052	-472.807	#NULL!	#NULL!	304.005	-49.7305	626.918	-331.896	#NULL!	#NULL!	-479.607	-623.703	-411.342	-717.804	#NULL!	#NULL!	689.539	-681.804	158.724	-694.453	#NULL!	#NULL!	6.4103	0.959233	-350.534	-501.863	#NULL!	#NULL!	314.559	-552.374
260.96	-412.652	168.026	-613.304	#NULL!	#NULL!	-395.406	-270.132	-146.728	-600.367	#NULL!	#NULL!	518.278	-373.259	561.304	-755.984	#NULL!	#NULL!	-248.789	-742.103	-100.419	-470.431	#NULL!	#NULL!	379.89	-47.9271	591.079	-331.825	#NULL!	#NULL!	-484.951	-623.687	-268.516	-716.056	#NULL!	#NULL!	733.942	-679.573	153.8	-694.453	#NULL!	#NULL!	73.6992	3.14613	-355.458	-501.863	#NULL!	#NULL!	310.221	-552.343
249.284	-412.605	163.107	-613.285	#NULL!	#NULL!	-400.322	-270.112	-127.04	-598.111	#NULL!	#NULL!	514.582	-373.237	484.298	-755.565	#NULL!	#NULL!	-283.282	-740.724	-105.347	-470.404	#NULL!	#NULL!	375.615	-47.9144	594.833	-329.462	#NULL!	#NULL!	-511.668	-623.607	-273.334	-717.062	#NULL!	#NULL!	712.976	-679.532	148.877	-694.453	#NULL!	#NULL!	-30.9231	3.73597	-359.153	-503.023	#NULL!	#NULL!	305.884	-552.313
441.034	-411.041	224.607	-611.196	#NULL!	#NULL!	-405.239	-270.093	-131.959	-598.091	#NULL!	#NULL!	478.851	-373.024	464.585	-755.458	#NULL!	#NULL!	-288.21	-740.695	-109.051	-471.558	#NULL!	#NULL!	367.066	-47.8889	647.256	-328.889	#NULL!	#NULL!	-519.144	-622.571	-281.888	-716.03	#NULL!	#NULL!	708.043	-679.522	143.953	-694.453	#NULL!	#NULL!	78.0253	7.77332	-375.154	-501.863	#NULL!	#NULL!	324.486	-550.126
254.212	-409.904	187.717	-610.659	#NULL!	#NULL!	-410.155	-270.073	-136.865	-595.737	#NULL!	#NULL!	475.161	-371.828	460.273	-755.434	#NULL!	#NULL!	-293.139	-740.666	-95.4759	-468.108	#NULL!	#NULL!	317.907	-47.7426	588.422	-327.757	#NULL!	#NULL!	-523.423	-623.572	-338.587	-715.917	#NULL!	#NULL!	683.378	-679.475	139.029	-694.453	#NULL!	#NULL!	-28.2987	7.98017	-380.077	-501.863	#NULL!	#NULL!	320.149	-550.095
436.127	-408.69	181.566	-611.024	#NULL!	#NULL!	-417.535	-271.209	-141.784	-595.717	#NULL!	#NULL!	646.434	-370.497	624.764	-755.155	#NULL!	#NULL!	-298.067	-740.637	-100.39	-465.732	#NULL!	#NULL!	313.632	-47.7299	584.678	-327.749	#NULL!	#NULL!	-494.022	-620.616	-364.263	-715.866	#NULL!	#NULL!	678.444	-679.465	134.105	-694.453	#NULL!	#NULL!	53.3645	10.1391	-303.753	-499.156	#NULL!	#NULL!	314.587	-547.352
296.011	-407.74	176.647	-611.004	#NULL!	#NULL!	-374.492	-265.553	-146.703	-595.697	#NULL!	#NULL!	628.569	-370.391	618.611	-753.947	#NULL!	#NULL!	-193.943	-738.906	-104.086	-465.712	#NULL!	#NULL!	298.671	-47.6854	638.711	-325.825	#NULL!	#NULL!	-500.972	-621.61	-377.1	-715.841	#NULL!	#NULL!	673.511	-679.455	130.412	-694.453	#NULL!	#NULL!	84.2013	12.3969	-309.293	-499.542	#NULL!	#NULL!	309.621	-548.862
289.864	-408.104	259.052	-608.999	#NULL!	#NULL!	-379.408	-265.533	-128.245	-593.436	#NULL!	#NULL!	619.328	-370.336	613.682	-753.92	#NULL!	#NULL!	-256.78	-738.533	-95.4467	-463.409	#NULL!	#NULL!	291.19	-47.6631	596.984	-326.758	#NULL!	#NULL!	-507.914	-620.575	-398.496	-715.798	#NULL!	#NULL!	655.629	-679.42	168.581	-689.813	#NULL!	#NULL!	-11.0187	12.9685	-345.606	-499.542	#NULL!	#NULL!	325.752	-545.499
284.947	-408.085	254.133	-608.98	#NULL!	#NULL!	-384.324	-265.513	-133.164	-593.416	#NULL!	#NULL!	603.927	-370.245	608.754	-753.893	#NULL!	#NULL!	-268.491	-739.638	-100.36	-461.033	#NULL!	#NULL!	363.868	-45.8502	592.71	-325.734	#NULL!	#NULL!	-533.563	-620.499	-292.22	-713.639	#NULL!	#NULL!	727.781	-676.857	163.657	-689.813	#NULL!	#NULL!	102.606	16.6104	-276.669	-497.222	#NULL!	#NULL!	323.267	-546.64
280.031	-408.065	249.214	-608.96	#NULL!	#NULL!	-389.241	-265.494	-139.3	-591.057	#NULL!	#NULL!	560.188	-369.985	603.826	-753.866	#NULL!	#NULL!	-302.367	-738.263	-104.057	-461.012	#NULL!	#NULL!	323.263	-44.7147	580.942	-325.711	#NULL!	#NULL!	-468.365	-618.663	-333.23	-713.896	#NULL!	#NULL!	721.614	-677.231	158.733	-689.813	#NULL!	#NULL!	23.7803	17.1501	-281.592	-497.222	#NULL!	#NULL!	317.092	-542.734
275.115	-408.045	244.295	-608.94	#NULL!	#NULL!	-394.157	-265.474	-144.219	-591.037	#NULL!	#NULL!	546.629	-371.079	598.897	-753.84	#NULL!	#NULL!	-188.384	-736.2	-96.6495	-458.703	#NULL!	#NULL!	308.301	-44.6702	618.928	-323.755	#NULL!	#NULL!	-474.243	-618.646	-411.325	-713.741	#NULL!	#NULL!	716.681	-677.221	151.348	-689.426	#NULL!	#NULL!	-16.3013	17.228	-286.519	-498.382	#NULL!	#NULL!	311.513	-543.081
270.198	-408.026	229.538	-608.881	#NULL!	#NULL!	-399.074	-265.454	-147.915	-592.19	#NULL!	#NULL!	541.09	-369.871	593.969	-753.813	#NULL!	#NULL!	-214.26	-736.437	-102.795	-456.32	#NULL!	#NULL!	286.923	-45.6212	589.504	-324.712	#NULL!	#NULL!	-477.449	-618.636	-268.499	-711.994	#NULL!	#NULL!	703.116	-676.809	145.192	-689.813	#NULL!	#NULL!	105.803	21.6261	-291.44	-497.222	#NULL!	#NULL!	305.936	-543.042
265.282	-408.006	220.93	-608.846	#NULL!	#NULL!	-403.99	-265.435	-130.679	-588.756	#NULL!	#NULL!	510.898	-370.866	589.04	-753.786	#NULL!	#NULL!	-227.811	-735.966	-97.8498	-453.606	#NULL!	#NULL!	358.533	-43.805	638.193	-321.762	#NULL!	#NULL!	-497.758	-619.59	-282.941	-711.965	#NULL!	#NULL!	696.948	-677.183	140.269	-689.813	#NULL!	#NULL!	38.1781	21.7577	-296.364	-497.222	#NULL!	#NULL!	325.158	-540.859
260.365	-407.986	170.512	-608.255	#NULL!	#NULL!	-408.906	-265.415	-135.599	-588.737	#NULL!	#NULL!	507.202	-370.844	584.112	-753.759	#NULL!	#NULL!	-233.974	-736.32	-103.998	-451.615	#NULL!	#NULL!	355.327	-43.7955	633.387	-319.721	#NULL!	#NULL!	-520.196	-618.509	-338.57	-711.855	#NULL!	#NULL!	692.015	-677.173	135.345	-689.813	#NULL!	#NULL!	-9.51105	20.6915	-350.526	-497.222	#NULL!	#NULL!	319.594	-538.502
248.689	-407.939	164.362	-608.62	#NULL!	#NULL!	-412.594	-265.4	-140.505	-586.382	#NULL!	#NULL!	460.382	-370.566	579.184	-753.732	#NULL!	#NULL!	-237.676	-737.472	-95.3588	-449.312	#NULL!	#NULL!	296.55	-43.6206	632.33	-316.672	#NULL!	#NULL!	-507.005	-616.181	-340.714	-712.866	#NULL!	#NULL!	687.082	-677.164	131.036	-689.813	#NULL!	#NULL!	111.979	26.2497	-354.219	-497.222	#NULL!	#NULL!	314.637	-538.467
431.836	-406.341	161.896	-609.777	#NULL!	#NULL!	-374.47	-260.501	-126.351	-584.104	#NULL!	#NULL!	448.067	-369.319	529.893	-754.639	#NULL!	#NULL!	-252.455	-736.211	-99.6711	-449.288	#NULL!	#NULL!	282.657	-43.5792	595.25	-315.244	#NULL!	#NULL!	-533.546	-616.44	-362.106	-711.808	#NULL!	#NULL!	669.406	-676.743	168.59	-684.785	#NULL!	#NULL!	23.7995	26.4213	-375.145	-497.222	#NULL!	#NULL!	309.68	-538.432
254.23	-405.63	239.389	-606.586	#NULL!	#NULL!	-380.617	-260.865	-131.885	-584.081	#NULL!	#NULL!	663.696	-368.251	508.957	-752.958	#NULL!	#NULL!	-261.08	-736.159	-103.969	-446.916	#NULL!	#NULL!	277.314	-43.5633	576.17	-315.545	#NULL!	#NULL!	-466.745	-614.61	-377.083	-711.778	#NULL!	#NULL!	634.049	-678.22	162.434	-685.172	#NULL!	#NULL!	65.7357	28.6575	-380.069	-497.222	#NULL!	#NULL!	304.103	-538.393
426.316	-403.599	234.47	-606.566	#NULL!	#NULL!	-385.534	-260.845	-136.804	-584.062	#NULL!	#NULL!	599.621	-369.045	502.794	-753.316	#NULL!	#NULL!	-286.954	-736.006	-76.8555	-445.888	#NULL!	#NULL!	274.108	-43.5538	603.993	-313.569	#NULL!	#NULL!	-473.156	-614.252	-394.2	-711.744	#NULL!	#NULL!	710.519	-674.892	157.511	-685.172	#NULL!	#NULL!	120.005	30.8697	-301.284	-494.902	#NULL!	#NULL!	299.778	-536.045
298.487	-403.476	224.632	-606.526	#NULL!	#NULL!	-390.45	-260.826	-129.4	-579.421	#NULL!	#NULL!	594.082	-367.838	497.866	-753.289	#NULL!	#NULL!	-291.882	-735.976	-95.3295	-444.613	#NULL!	#NULL!	351.061	-41.7536	621.119	-311.572	#NULL!	#NULL!	-477.966	-614.576	-287.923	-709.585	#NULL!	#NULL!	680.921	-674.834	152.587	-685.172	#NULL!	#NULL!	29.9754	31.0448	-306.207	-494.902	#NULL!	#NULL!	318.381	-533.858
293.571	-403.456	192.66	-606.009	#NULL!	#NULL!	-395.367	-260.806	-134.32	-579.402	#NULL!	#NULL!	589.764	-368.986	492.938	-753.263	#NULL!	#NULL!	-296.81	-735.947	-99.6419	-444.589	#NULL!	#NULL!	320.07	-41.6613	599.188	-311.528	#NULL!	#NULL!	-499.874	-614.511	-291.495	-710.932	#NULL!	#NULL!	675.988	-674.824	147.663	-685.172	#NULL!	#NULL!	87.3277	33.2511	-309.9	-494.902	#NULL!	#NULL!	313.424	-533.823
288.654	-403.436	186.51	-606.373	#NULL!	#NULL!	-400.283	-260.786	-138.624	-579.384	#NULL!	#NULL!	585.458	-367.786	488.009	-753.236	#NULL!	#NULL!	-193.919	-734.21	-96.5323	-439.907	#NULL!	#NULL!	315.795	-41.6486	594.909	-311.52	#NULL!	#NULL!	-519.11	-614.454	-330.004	-709.84	#NULL!	#NULL!	659.134	-674.405	142.739	-685.172	#NULL!	#NULL!	128.647	35.4885	-345.598	-494.902	#NULL!	#NULL!	310.939	-534.965
283.738	-403.417	181.59	-606.354	#NULL!	#NULL!	-405.2	-260.767	-129.376	-574.751	#NULL!	#NULL!	577.443	-368.913	479.387	-752.797	#NULL!	#NULL!	-256.959	-733.444	-99.0038	-441.068	#NULL!	#NULL!	311.52	-41.6359	575.652	-311.481	#NULL!	#NULL!	-413.837	-612.738	-411.308	-709.679	#NULL!	#NULL!	655.019	-675.943	137.815	-685.172	#NULL!	#NULL!	48.4842	35.6444	-279.122	-492.581	#NULL!	#NULL!	304.751	-533.376
278.822	-403.397	176.672	-606.334	#NULL!	#NULL!	-410.116	-260.747	-134.295	-574.732	#NULL!	#NULL!	572.515	-368.884	473.224	-753.155	#NULL!	#NULL!	-300.501	-734.751	-98.9673	-435.195	#NULL!	#NULL!	300.837	-40.5895	571.908	-311.474	#NULL!	#NULL!	-505.213	-613.481	-269.017	-707.93	#NULL!	#NULL!	730.257	-672.612	132.892	-685.172	#NULL!	#NULL!	90.4181	36.7218	-291.432	-492.581	#NULL!	#NULL!	298.154	-531.012
273.905	-403.377	259.077	-604.329	#NULL!	#NULL!	-415.032	-260.727	-139.214	-574.712	#NULL!	#NULL!	535.552	-368.664	468.296	-753.128	#NULL!	#NULL!	-229.021	-731.653	-94.6403	-432.869	#NULL!	#NULL!	293.353	-41.5818	619.527	-308.522	#NULL!	#NULL!	-509.483	-612.453	-339.623	-707.79	#NULL!	#NULL!	725.323	-672.603	129.199	-685.172	#NULL!	#NULL!	134.221	40.4995	-296.355	-492.581	#NULL!	#NULL!	314.689	-529.196
268.989	-403.358	254.158	-604.31	#NULL!	#NULL!	-369.534	-255.858	-143.506	-572.36	#NULL!	#NULL!	530.624	-368.635	573.04	-750.958	#NULL!	#NULL!	-231.491	-732.812	-98.3219	-430.499	#NULL!	#NULL!	266.636	-41.5023	614.178	-308.511	#NULL!	#NULL!	-534.063	-612.38	-362.089	-707.745	#NULL!	#NULL!	720.39	-672.593	173.522	-680.531	#NULL!	#NULL!	133.846	44.7496	-350.517	-492.581	#NULL!	#NULL!	309.732	-529.161
264.072	-403.338	249.239	-604.29	#NULL!	#NULL!	-375.681	-256.222	-129.351	-570.081	#NULL!	#NULL!	475.186	-367.132	566.878	-751.316	#NULL!	#NULL!	-286.927	-730.918	-92.7629	-428.18	#NULL!	#NULL!	262.365	-40.475	594.926	-307.457	#NULL!	#NULL!	-463.522	-610.561	-375.462	-707.719	#NULL!	#NULL!	715.457	-672.583	168.598	-680.531	#NULL!	#NULL!	137.926	49.3772	-354.212	-493.741	#NULL!	#NULL!	305.394	-529.131
259.156	-403.318	244.32	-604.27	#NULL!	#NULL!	-380.598	-256.202	-134.27	-570.062	#NULL!	#NULL!	454.24	-367.007	561.949	-751.289	#NULL!	#NULL!	-292.474	-731.276	-97.2635	-425.414	#NULL!	#NULL!	235.65	-40.0573	590.646	-307.449	#NULL!	#NULL!	-476.346	-610.523	-390.439	-707.689	#NULL!	#NULL!	705.591	-672.564	161.212	-680.531	#NULL!	#NULL!	152.199	53.5988	-372.674	-492.195	#NULL!	#NULL!	297.767	-526.373
249.323	-403.279	229.563	-604.211	#NULL!	#NULL!	-385.514	-256.182	-139.189	-570.042	#NULL!	#NULL!	441.303	-366.93	559.478	-752.45	#NULL!	#NULL!	-241.946	-729.228	-93.9511	-421.125	#NULL!	#NULL!	346.795	-39.7116	575.669	-307.419	#NULL!	#NULL!	-478.488	-611.531	-264.371	-705.569	#NULL!	#NULL!	700.658	-672.555	156.288	-680.531	#NULL!	#NULL!	157.801	58.6098	-378.214	-492.581	#NULL!	#NULL!	314.715	-524.561
244.407	-403.259	219.725	-604.172	#NULL!	#NULL!	-390.431	-256.163	-144.096	-567.687	#NULL!	#NULL!	641.53	-365.771	463.382	-750.752	#NULL!	#NULL!	-316.493	-729.959	-98.2634	-421.101	#NULL!	#NULL!	250.084	-38.4092	571.39	-307.41	#NULL!	#NULL!	-497.72	-610.459	-283.627	-705.531	#NULL!	#NULL!	695.725	-672.545	151.364	-680.531	#NULL!	#NULL!	159.229	63.6289	-301.274	-489.874	#NULL!	#NULL!	309.758	-524.526
254.251	-400.579	216.036	-604.157	#NULL!	#NULL!	-395.347	-256.143	-129.324	-565.022	#NULL!	#NULL!	622.433	-365.658	614.946	-748.836	#NULL!	#NULL!	-321.422	-729.93	-93.9218	-416.426	#NULL!	#NULL!	181.155	-37.8658	568.181	-307.404	#NULL!	#NULL!	-513.748	-610.073	-288.269	-706.876	#NULL!	#NULL!	690.792	-672.535	146.44	-680.531	#NULL!	#NULL!	173.729	67.85	-307.43	-490.261	#NULL!	#NULL!	304.814	-522.173
241.958	-400.918	170.535	-603.974	#NULL!	#NULL!	-400.263	-256.123	-135.475	-565.387	#NULL!	#NULL!	615.248	-365.224	608.783	-749.194	#NULL!	#NULL!	-237.619	-726.514	-98.8501	-416.399	#NULL!	#NULL!	330.773	-37.6347	586.91	-305.41	#NULL!	#NULL!	-519.093	-610.395	-326.242	-705.785	#NULL!	#NULL!	685.859	-672.526	141.517	-680.531	#NULL!	#NULL!	175.898	72.8677	-311.123	-490.261	#NULL!	#NULL!	299.856	-522.139
426.334	-399.325	165.616	-603.955	#NULL!	#NULL!	-405.18	-256.104	-140.394	-565.367	#NULL!	#NULL!	581.152	-366.587	603.855	-749.167	#NULL!	#NULL!	-286.905	-726.612	-92.2473	-411.344	#NULL!	#NULL!	327.567	-37.6252	593.873	-303.392	#NULL!	#NULL!	-521.235	-611.404	-411.291	-705.616	#NULL!	#NULL!	671.059	-672.497	136.593	-680.531	#NULL!	#NULL!	184.808	77.486	-345.178	-489.874	#NULL!	#NULL!	296.138	-522.112
422.032	-399.307	161.927	-603.94	#NULL!	#NULL!	-410.096	-256.084	-124.383	-560.761	#NULL!	#NULL!	568.831	-366.514	598.927	-749.141	#NULL!	#NULL!	-291.833	-726.583	-98.8209	-411.7	#NULL!	#NULL!	316.88	-37.5934	589.593	-303.384	#NULL!	#NULL!	-530.849	-610.36	-336.932	-703.733	#NULL!	#NULL!	666.126	-672.487	131.669	-680.531	#NULL!	#NULL!	180.926	81.7429	-281.575	-487.94	#NULL!	#NULL!	314.741	-519.925
296.044	-399.969	239.415	-601.526	#NULL!	#NULL!	-414.398	-256.067	-129.302	-560.741	#NULL!	#NULL!	526.94	-366.265	593.998	-749.114	#NULL!	#NULL!	-296.762	-726.554	-92.6312	-407.034	#NULL!	#NULL!	299.782	-37.5425	575.686	-303.356	#NULL!	#NULL!	-413.286	-608.681	-362.072	-703.683	#NULL!	#NULL!	740.128	-670.314	127.976	-680.531	#NULL!	#NULL!	190.417	86.36	-295.116	-487.94	#NULL!	#NULL!	309.784	-519.89
291.127	-399.949	233.265	-601.891	#NULL!	#NULL!	-417.476	-257.22	-134.221	-560.722	#NULL!	#NULL!	658.792	-363.525	589.07	-749.087	#NULL!	#NULL!	-245.008	-725.687	-98.7916	-407.001	#NULL!	#NULL!	293.37	-37.5234	571.403	-304.363	#NULL!	#NULL!	-526.031	-608.346	-372.235	-703.663	#NULL!	#NULL!	735.194	-670.304	173.53	-675.89	#NULL!	#NULL!	190.736	91.3813	-367.741	-487.554	#NULL!	#NULL!	304.84	-517.538
286.216	-398.764	224.658	-601.467	#NULL!	#NULL!	-364.598	-251.214	-139.14	-560.702	#NULL!	#NULL!	565.147	-364.143	584.141	-749.06	#NULL!	#NULL!	-300.452	-725.358	-92.6019	-402.335	#NULL!	#NULL!	269.859	-37.4534	585.323	-301.344	#NULL!	#NULL!	-460.299	-606.512	-388.817	-703.63	#NULL!	#NULL!	710.529	-670.256	168.606	-675.89	#NULL!	#NULL!	195.325	95.6217	-373.897	-487.94	#NULL!	#NULL!	299.882	-517.503
281.3	-398.744	179.156	-601.674	#NULL!	#NULL!	-370.745	-251.578	-142.829	-560.687	#NULL!	#NULL!	522.029	-362.713	579.213	-749.033	#NULL!	#NULL!	-309.686	-724.129	-98.7623	-402.302	#NULL!	#NULL!	260.245	-36.4102	604.053	-299.35	#NULL!	#NULL!	-497.703	-606.4	-261.502	-701.851	#NULL!	#NULL!	680.93	-670.198	163.683	-675.89	#NULL!	#NULL!	201.544	99.8589	-378.205	-487.94	#NULL!	#NULL!	295.545	-517.472
276.383	-398.724	174.237	-601.654	#NULL!	#NULL!	-375.662	-251.559	-124.358	-556.091	#NULL!	#NULL!	472.13	-362.417	525.001	-748.738	#NULL!	#NULL!	-237.597	-722.208	-90.1084	-397.65	#NULL!	#NULL!	252.764	-36.3879	591.75	-299.326	#NULL!	#NULL!	-510.531	-607.377	-280.224	-701.814	#NULL!	#NULL!	675.997	-670.189	158.759	-675.89	#NULL!	#NULL!	208.338	104.868	-286.084	-485.233	#NULL!	#NULL!	314.767	-515.29
272.696	-398.709	256.642	-599.65	#NULL!	#NULL!	-380.578	-251.539	-129.277	-556.072	#NULL!	#NULL!	451.184	-362.292	513.912	-748.678	#NULL!	#NULL!	-291.809	-721.886	-95.0368	-397.623	#NULL!	#NULL!	245.279	-37.3802	587.471	-299.317	#NULL!	#NULL!	-522.282	-606.327	-323.551	-701.728	#NULL!	#NULL!	661.814	-670.161	153.835	-675.89	#NULL!	#NULL!	209.581	109.501	-301.266	-485.233	#NULL!	#NULL!	309.81	-515.255
266.545	-399.851	251.723	-599.63	#NULL!	#NULL!	-385.494	-251.519	-134.196	-556.052	#NULL!	#NULL!	437.631	-362.212	508.984	-748.651	#NULL!	#NULL!	-296.737	-721.857	-98.7257	-396.428	#NULL!	#NULL!	241.004	-37.3675	561.269	-297.234	#NULL!	#NULL!	-529.767	-607.32	-408.6	-701.559	#NULL!	#NULL!	730.266	-667.977	148.911	-675.89	#NULL!	#NULL!	213.7	113.742	-307.421	-485.62	#NULL!	#NULL!	304.866	-512.902
261.634	-398.665	246.804	-599.61	#NULL!	#NULL!	-390.411	-251.5	-139.115	-556.032	#NULL!	#NULL!	635.388	-362.212	504.056	-748.624	#NULL!	#NULL!	-308.43	-719.439	-90.0791	-392.951	#NULL!	#NULL!	222.307	-36.2973	560.216	-293.169	#NULL!	#NULL!	-414.341	-605.634	-273.262	-699.797	#NULL!	#NULL!	725.333	-667.967	143.987	-675.89	#NULL!	#NULL!	214.533	118.762	-312.345	-485.62	#NULL!	#NULL!	300.528	-512.872
246.885	-398.606	217.29	-599.492	#NULL!	#NULL!	-395.327	-251.48	-142.811	-557.185	#NULL!	#NULL!	611.984	-360.899	499.127	-748.597	#NULL!	#NULL!	-193.223	-718.949	-93.7754	-392.93	#NULL!	#NULL!	249.566	-34.3492	550.062	-291.118	#NULL!	#NULL!	-526.014	-604.287	-334.24	-699.676	#NULL!	#NULL!	720.4	-667.957	139.063	-675.89	#NULL!	#NULL!	221.444	123.771	-317.269	-485.62	#NULL!	#NULL!	294.951	-512.833
256.722	-397.48	168.102	-598.905	#NULL!	#NULL!	-400.244	-251.46	-124.334	-551.421	#NULL!	#NULL!	514.033	-360.317	494.199	-748.57	#NULL!	#NULL!	-198.152	-718.92	-89.4338	-388.255	#NULL!	#NULL!	231.399	-34.2951	593.932	-289.174	#NULL!	#NULL!	-468.836	-603.443	-361.52	-699.621	#NULL!	#NULL!	715.467	-667.948	134.755	-675.89	#NULL!	#NULL!	226.4	128.011	-322.192	-485.62	#NULL!	#NULL!	314.794	-510.654
251.806	-397.46	162.566	-599.272	#NULL!	#NULL!	-404.546	-251.443	-129.252	-551.402	#NULL!	#NULL!	653.888	-358.799	489.271	-748.543	#NULL!	#NULL!	-201.842	-717.724	-93.7461	-388.231	#NULL!	#NULL!	213.231	-34.241	546.506	-288.741	#NULL!	#NULL!	-473.106	-602.415	-370.613	-699.603	#NULL!	#NULL!	705.601	-667.929	171.077	-671.25	#NULL!	#NULL!	228.47	132.256	-324.657	-486.78	#NULL!	#NULL!	309.836	-510.619
243.207	-396.26	241.899	-596.866	#NULL!	#NULL!	-408.852	-252.592	-134.172	-551.382	#NULL!	#NULL!	608.3	-358.528	484.342	-748.517	#NULL!	#NULL!	-237.572	-717.511	-87.5564	-383.566	#NULL!	#NULL!	206.819	-34.2219	591.81	-285.107	#NULL!	#NULL!	-483.793	-602.384	-390.94	-699.563	#NULL!	#NULL!	700.668	-667.919	166.153	-671.25	#NULL!	#NULL!	230.486	137.274	-340.657	-485.62	#NULL!	#NULL!	306.751	-508.28
425.125	-394.657	235.749	-597.231	#NULL!	#NULL!	-361.71	-246.563	-138.476	-551.365	#NULL!	#NULL!	518.351	-359.168	479.414	-748.49	#NULL!	#NULL!	-242.501	-717.482	-88.7665	-380.035	#NULL!	#NULL!	197.203	-33.8551	588.6	-285.101	#NULL!	#NULL!	-497.686	-602.342	-261.485	-697.789	#NULL!	#NULL!	695.734	-667.909	161.229	-671.25	#NULL!	#NULL!	234.928	140.742	-344.35	-485.62	#NULL!	#NULL!	301.794	-508.245
420.208	-394.637	230.83	-597.211	#NULL!	#NULL!	-369.496	-246.921	-124.309	-546.751	#NULL!	#NULL!	507.885	-357.932	474.486	-748.463	#NULL!	#NULL!	-247.429	-717.453	-94.8465	-367.079	#NULL!	#NULL!	183.843	-34.1535	548.306	-284.682	#NULL!	#NULL!	-509.976	-602.306	-277.537	-698.773	#NULL!	#NULL!	690.801	-667.9	156.305	-671.25	#NULL!	#NULL!	240.694	153.092	-328.342	-482.913	#NULL!	#NULL!	294.977	-508.197
417.745	-395.793	225.911	-597.191	#NULL!	#NULL!	-374.413	-246.901	-129.228	-546.731	#NULL!	#NULL!	466.61	-357.687	469.557	-748.436	#NULL!	#NULL!	-251.132	-718.605	-101.014	-368.22	#NULL!	#NULL!	177.961	-35.1507	588.617	-281.038	#NULL!	#NULL!	-517.99	-602.282	-280.742	-697.751	#NULL!	#NULL!	685.868	-667.89	151.381	-671.25	#NULL!	#NULL!	248.777	158.485	-335.729	-483.3	#NULL!	#NULL!	312.341	-506.001
282.548	-394.086	220.992	-597.172	#NULL!	#NULL!	-379.329	-246.881	-133.532	-546.714	#NULL!	#NULL!	449.361	-357.585	573.07	-746.259	#NULL!	#NULL!	-289.318	-716.813	-94.2011	-362.384	#NULL!	#NULL!	309.417	-33.5127	585.408	-281.032	#NULL!	#NULL!	-413.786	-600.563	-326.743	-697.659	#NULL!	#NULL!	671.069	-667.861	146.458	-671.25	#NULL!	#NULL!	231.261	156.974	-367.733	-483.3	#NULL!	#NULL!	307.397	-503.649
277.632	-394.066	214.228	-597.144	#NULL!	#NULL!	-384.246	-246.861	-139.066	-546.692	#NULL!	#NULL!	439.504	-357.526	566.907	-746.617	#NULL!	#NULL!	-295.481	-717.168	-89.2435	-357.711	#NULL!	#NULL!	305.142	-33.4999	567.223	-280.657	#NULL!	#NULL!	-457.602	-600.432	-405.908	-697.502	#NULL!	#NULL!	666.136	-667.852	141.534	-671.25	#NULL!	#NULL!	261.489	162.709	-372.042	-483.3	#NULL!	#NULL!	302.439	-503.614
272.716	-394.046	180.412	-596.62	#NULL!	#NULL!	-389.162	-246.842	-124.284	-542.081	#NULL!	#NULL!	613.241	-356.209	561.979	-746.59	#NULL!	#NULL!	-300.409	-717.138	-94.1719	-357.685	#NULL!	#NULL!	300.867	-33.4872	551.17	-281.979	#NULL!	#NULL!	-465.621	-601.423	-274.319	-696.748	#NULL!	#NULL!	642.701	-668.965	136.61	-671.25	#NULL!	#NULL!	233.737	161.604	-377.583	-484.46	#NULL!	#NULL!	298.102	-503.583
270.252	-395.202	174.261	-596.984	#NULL!	#NULL!	-393.464	-246.825	-129.203	-542.062	#NULL!	#NULL!	491.258	-356.659	557.666	-746.566	#NULL!	#NULL!	-304.721	-717.113	-89.2142	-353.012	#NULL!	#NULL!	296.592	-33.4745	537.802	-280.937	#NULL!	#NULL!	-505.158	-600.291	-330.656	-695.282	#NULL!	#NULL!	740.137	-665.678	131.686	-671.25	#NULL!	#NULL!	253.483	167.747	-284.024	-480.979	#NULL!	#NULL!	293.764	-503.553
230.926	-393.879	254.207	-594.97	#NULL!	#NULL!	-400.224	-246.797	-140.886	-542.015	#NULL!	#NULL!	477.711	-355.404	464.644	-746.06	#NULL!	#NULL!	-162.397	-714.435	-94.766	-354.157	#NULL!	#NULL!	292.318	-33.4618	522.648	-280.569	#NULL!	#NULL!	-525.463	-600.23	-359.364	-695.563	#NULL!	#NULL!	735.204	-665.668	127.382	-668.929	#NULL!	#NULL!	250.408	172.002	-288.948	-480.979	#NULL!	#NULL!	312.367	-501.366
242.612	-391.594	249.288	-594.95	#NULL!	#NULL!	-402.687	-247.953	-124.26	-537.411	#NULL!	#NULL!	648.978	-355.247	460.947	-746.04	#NULL!	#NULL!	-204.282	-713.012	-87.9529	-348.32	#NULL!	#NULL!	269.345	-32.3788	533.354	-278.559	#NULL!	#NULL!	-475.226	-598.351	-368.992	-695.544	#NULL!	#NULL!	710.539	-665.234	171.086	-666.222	#NULL!	#NULL!	251.651	176.635	-301.26	-482.14	#NULL!	#NULL!	307.423	-499.013
421.457	-389.979	209.936	-594.792	#NULL!	#NULL!	-359.644	-242.297	-129.179	-537.392	#NULL!	#NULL!	632.967	-353.978	614.975	-744.137	#NULL!	#NULL!	-237.554	-713.989	-86.0828	-344.806	#NULL!	#NULL!	261.326	-33.3695	586.49	-277.987	#NULL!	#NULL!	-500.875	-598.274	-391.993	-695.498	#NULL!	#NULL!	680.941	-665.177	164.931	-666.609	#NULL!	#NULL!	256.903	181.647	-317.26	-480.979	#NULL!	#NULL!	302.466	-498.978
417.77	-389.964	206.247	-594.777	#NULL!	#NULL!	-364.56	-242.277	-133.47	-535.039	#NULL!	#NULL!	503.591	-354.384	608.812	-744.495	#NULL!	#NULL!	-242.476	-712.786	-87.8943	-338.922	#NULL!	#NULL!	238.884	-33.3027	579.002	-277.972	#NULL!	#NULL!	-512.63	-598.239	-261.468	-693.726	#NULL!	#NULL!	674.774	-665.551	160.007	-666.609	#NULL!	#NULL!	259.317	185.892	-322.184	-480.979	#NULL!	#NULL!	298.128	-498.948
281.339	-389.418	197.639	-594.743	#NULL!	#NULL!	-369.477	-242.257	-124.233	-532.352	#NULL!	#NULL!	498.668	-353.181	603.884	-744.468	#NULL!	#NULL!	-247.405	-712.756	-92.2139	-340.073	#NULL!	#NULL!	234.609	-33.29	572.587	-276.944	#NULL!	#NULL!	-517.974	-598.223	-279.12	-693.691	#NULL!	#NULL!	663.057	-665.528	155.083	-666.609	#NULL!	#NULL!	262.471	190.521	-340.237	-480.593	#NULL!	#NULL!	292.551	-498.909
276.423	-389.398	192.72	-594.723	#NULL!	#NULL!	-374.393	-242.238	-130.384	-532.717	#NULL!	#NULL!	461.706	-352.961	598.956	-744.442	#NULL!	#NULL!	-286.832	-712.522	-87.249	-334.226	#NULL!	#NULL!	223.927	-32.2436	569.374	-277.953	#NULL!	#NULL!	-522.248	-598.211	-404.822	-693.442	#NULL!	#NULL!	731.507	-664.502	150.159	-666.609	#NULL!	#NULL!	279.438	195.124	-328.334	-478.272	#NULL!	#NULL!	312.393	-496.73
272.735	-389.384	187.801	-594.703	#NULL!	#NULL!	-379.31	-242.218	-137.147	-532.69	#NULL!	#NULL!	448.147	-354.055	594.027	-744.415	#NULL!	#NULL!	-291.76	-712.493	-85.3716	-329.537	#NULL!	#NULL!	220.186	-32.2325	565.094	-277.945	#NULL!	#NULL!	-406.823	-596.525	-322.438	-691.574	#NULL!	#NULL!	716.71	-663.315	145.235	-666.609	#NULL!	#NULL!	252.923	195.175	-334.489	-478.659	#NULL!	#NULL!	307.449	-494.377
240.788	-386.924	168.125	-594.625	#NULL!	#NULL!	-384.226	-242.198	-118.061	-528.096	#NULL!	#NULL!	440.76	-352.837	589.099	-744.388	#NULL!	#NULL!	-296.688	-712.464	-83.4942	-324.849	#NULL!	#NULL!	174.767	-32.0973	561.885	-277.938	#NULL!	#NULL!	-411.097	-596.512	-326.718	-691.566	#NULL!	#NULL!	703.144	-662.902	140.311	-666.609	#NULL!	#NULL!	268.657	199.78	-370.187	-478.659	#NULL!	#NULL!	302.492	-494.343
238.325	-388.08	163.206	-594.605	#NULL!	#NULL!	-389.142	-242.179	-124.21	-528.071	#NULL!	#NULL!	643.452	-351.692	584.171	-744.361	#NULL!	#NULL!	-301.617	-712.434	-85.9144	-317.786	#NULL!	#NULL!	170.493	-32.0846	556.54	-276.912	#NULL!	#NULL!	-414.303	-596.503	-329.927	-691.559	#NULL!	#NULL!	696.977	-663.276	135.388	-666.609	#NULL!	#NULL!	284.523	203.999	-281.553	-475.952	#NULL!	#NULL!	297.534	-494.308
223.581	-386.855	244.382	-592.595	#NULL!	#NULL!	-394.059	-242.159	-129.129	-528.052	#NULL!	#NULL!	610.185	-351.494	579.242	-744.334	#NULL!	#NULL!	-305.313	-712.413	-80.9641	-314.289	#NULL!	#NULL!	153.394	-32.0337	524.446	-276.848	#NULL!	#NULL!	-454.917	-597.396	-357.742	-691.504	#NULL!	#NULL!	692.044	-663.267	130.464	-666.609	#NULL!	#NULL!	275.352	207.107	-287.709	-476.339	#NULL!	#NULL!	292.577	-494.273
421.477	-385.316	239.463	-592.576	#NULL!	#NULL!	-398.975	-242.139	-132.825	-529.204	#NULL!	#NULL!	605.873	-351.469	525.03	-744.039	#NULL!	#NULL!	-279.413	-707.478	-86.5012	-313.084	#NULL!	#NULL!	286.983	-31.4166	521.237	-276.842	#NULL!	#NULL!	-464.527	-595.338	-367.37	-691.485	#NULL!	#NULL!	687.111	-663.257	126.16	-664.288	#NULL!	#NULL!	294.477	211.319	-290.173	-477.499	#NULL!	#NULL!	288.859	-494.247
416.56	-385.296	233.314	-592.551	#NULL!	#NULL!	-354.718	-239.985	-116.807	-523.431	#NULL!	#NULL!	443.237	-350.503	513.942	-743.979	#NULL!	#NULL!	-285.575	-707.833	-82.1669	-309.583	#NULL!	#NULL!	265.614	-30.3384	535.149	-275.854	#NULL!	#NULL!	-467.733	-595.329	-393.045	-691.434	#NULL!	#NULL!	668.613	-662.835	176.018	-661.581	#NULL!	#NULL!	267.139	211.372	-316.021	-476.339	#NULL!	#NULL!	304.996	-489.724
281.36	-384.366	228.395	-592.531	#NULL!	#NULL!	-359.623	-237.245	-121.726	-523.411	#NULL!	#NULL!	630.527	-349.267	509.013	-743.952	#NULL!	#NULL!	-290.504	-707.803	-87.0953	-309.557	#NULL!	#NULL!	242.103	-30.2685	531.943	-274.832	#NULL!	#NULL!	-500.862	-595.23	-260.916	-689.665	#NULL!	#NULL!	659.158	-662.816	169.863	-661.968	#NULL!	#NULL!	297.529	215.949	-320.944	-476.339	#NULL!	#NULL!	300.039	-489.69
275.828	-384.733	223.476	-592.511	#NULL!	#NULL!	-365.77	-237.609	-126.645	-523.392	#NULL!	#NULL!	497.461	-348.476	504.085	-743.925	#NULL!	#NULL!	-295.432	-707.774	-90.7916	-309.536	#NULL!	#NULL!	229.274	-31.2449	556.557	-272.85	#NULL!	#NULL!	-506.205	-595.214	-276.964	-689.633	#NULL!	#NULL!	655.043	-664.354	164.939	-661.968	#NULL!	#NULL!	271.465	215.999	-339.409	-476.339	#NULL!	#NULL!	295.082	-489.655
272.75	-385.886	218.557	-592.492	#NULL!	#NULL!	-370.686	-237.59	-130.334	-523.377	#NULL!	#NULL!	456.802	-348.235	499.157	-743.898	#NULL!	#NULL!	-300.36	-707.745	-82.1303	-303.71	#NULL!	#NULL!	217.523	-30.1953	552.278	-272.841	#NULL!	#NULL!	-512.079	-594.182	-381.981	-689.086	#NULL!	#NULL!	740.147	-661.043	160.015	-661.968	#NULL!	#NULL!	280.639	220.617	-325.863	-473.632	#NULL!	#NULL!	289.505	-489.616
238.35	-382.251	213.638	-592.472	#NULL!	#NULL!	-375.603	-237.57	-118.012	-518.756	#NULL!	#NULL!	435.856	-348.111	494.228	-743.871	#NULL!	#NULL!	-304.673	-707.719	-82.1011	-299.011	#NULL!	#NULL!	206.836	-30.1635	524.463	-272.786	#NULL!	#NULL!	-521.163	-594.155	-385.553	-690.433	#NULL!	#NULL!	735.83	-661.034	155.091	-661.968	#NULL!	#NULL!	286.746	225.241	-332.019	-474.018	#NULL!	#NULL!	305.022	-485.089
222.371	-382.187	182.894	-592.349	#NULL!	#NULL!	-380.519	-237.55	-122.931	-518.736	#NULL!	#NULL!	641.628	-346.984	489.3	-743.844	#NULL!	#NULL!	-274.462	-703.202	-86.9782	-290.76	#NULL!	#NULL!	199.356	-30.1412	521.254	-272.779	#NULL!	#NULL!	-408.943	-592.46	-406.409	-689.376	#NULL!	#NULL!	710.548	-660.985	150.168	-661.968	#NULL!	#NULL!	303.662	229.844	-336.942	-474.018	#NULL!	#NULL!	300.065	-485.054
421.496	-380.653	177.975	-592.329	#NULL!	#NULL!	-385.435	-237.53	-127.85	-518.717	#NULL!	#NULL!	608.361	-346.787	484.372	-743.818	#NULL!	#NULL!	-279.39	-703.173	-78.3243	-286.108	#NULL!	#NULL!	191.875	-30.119	550.147	-270.806	#NULL!	#NULL!	-412.683	-592.449	-322.421	-687.511	#NULL!	#NULL!	680.949	-660.927	145.244	-661.968	#NULL!	#NULL!	279.51	229.891	-367.716	-474.018	#NULL!	#NULL!	295.108	-485.019
417.195	-380.636	173.056	-592.309	#NULL!	#NULL!	-389.737	-237.513	-131.539	-518.702	#NULL!	#NULL!	602.195	-347.924	479.443	-743.791	#NULL!	#NULL!	-284.319	-703.143	-79.5051	-277.878	#NULL!	#NULL!	187.6	-30.1062	558.715	-268.453	#NULL!	#NULL!	-449.018	-592.341	-329.91	-687.497	#NULL!	#NULL!	676.016	-660.918	140.32	-661.968	#NULL!	#NULL!	292.21	234.115	-371.409	-474.018	#NULL!	#NULL!	290.151	-484.985
283.837	-380.102	254.232	-590.3	#NULL!	#NULL!	-392.815	-238.667	-116.758	-514.091	#NULL!	#NULL!	596.04	-346.713	474.515	-743.764	#NULL!	#NULL!	-289.247	-703.114	-83.2087	-279.033	#NULL!	#NULL!	183.325	-30.0935	553.365	-268.781	#NULL!	#NULL!	-515.276	-592.144	-357.725	-687.441	#NULL!	#NULL!	649.501	-660.866	136.625	-663.128	#NULL!	#NULL!	295.507	238.744	-281.545	-471.698	#NULL!	#NULL!	305.668	-480.458
278.92	-380.082	249.313	-590.28	#NULL!	#NULL!	-352.24	-235.332	-121.677	-514.071	#NULL!	#NULL!	491.725	-345.703	469.587	-743.737	#NULL!	#NULL!	-292.943	-703.092	-78.2511	-274.361	#NULL!	#NULL!	167.295	-30.0458	526.615	-269.743	#NULL!	#NULL!	-511.17	-589.788	-366.818	-687.423	#NULL!	#NULL!	715.486	-658.677	131.703	-661.968	#NULL!	#NULL!	296.121	244.151	-285.854	-471.698	#NULL!	#NULL!	300.091	-480.419
275.228	-381.233	207.913	-589.725	#NULL!	#NULL!	-357.146	-232.981	-126.596	-514.052	#NULL!	#NULL!	469.135	-345.96	573.099	-741.56	#NULL!	#NULL!	-236.255	-701.08	-76.3664	-268.497	#NULL!	#NULL!	159.814	-30.0236	521.271	-268.717	#NULL!	#NULL!	-407.857	-588.405	-389.819	-687.378	#NULL!	#NULL!	705.62	-658.658	128.013	-660.808	#NULL!	#NULL!	303.752	248.386	-313.549	-471.311	#NULL!	#NULL!	295.134	-480.384
288.763	-377.79	197.663	-590.073	#NULL!	#NULL!	-362.063	-232.961	-130.285	-514.037	#NULL!	#NULL!	465.439	-345.938	566.936	-741.918	#NULL!	#NULL!	-247.344	-701.014	-75.7284	-264.976	#NULL!	#NULL!	124.549	-29.5804	517.535	-266.678	#NULL!	#NULL!	-449.536	-588.281	-393.563	-687.37	#NULL!	#NULL!	700.687	-658.648	176.026	-657.327	#NULL!	#NULL!	285.72	250.739	-318.476	-472.858	#NULL!	#NULL!	290.177	-480.349
237.14	-377.583	192.744	-590.053	#NULL!	#NULL!	-366.979	-232.941	-119.193	-509.411	#NULL!	#NULL!	443.261	-345.806	562.008	-741.891	#NULL!	#NULL!	-271.974	-698.52	-80.0333	-263.778	#NULL!	#NULL!	283.785	-29.3779	556.591	-264.725	#NULL!	#NULL!	-453.276	-588.27	-257.69	-685.609	#NULL!	#NULL!	695.754	-658.638	171.102	-657.327	#NULL!	#NULL!	301.621	253.412	-306.16	-469.377	#NULL!	#NULL!	285.232	-477.997
232.839	-377.566	187.826	-590.034	#NULL!	#NULL!	-371.896	-232.922	-124.112	-509.392	#NULL!	#NULL!	630.551	-344.57	557.695	-741.867	#NULL!	#NULL!	-276.902	-698.491	-78.9749	-258.693	#NULL!	#NULL!	279.511	-29.3652	552.312	-264.716	#NULL!	#NULL!	-396.093	-586.41	-275.877	-685.573	#NULL!	#NULL!	690.821	-658.629	166.179	-657.327	#NULL!	#NULL!	307.604	257.649	-325.855	-469.377	#NULL!	#NULL!	305.075	-475.818
222.391	-377.524	168.149	-589.955	#NULL!	#NULL!	-376.812	-232.902	-129.031	-509.372	#NULL!	#NULL!	454.362	-343.524	464.673	-741.361	#NULL!	#NULL!	-281.83	-698.461	-83.0916	-260.237	#NULL!	#NULL!	270.961	-29.3397	549.103	-264.71	#NULL!	#NULL!	-458.075	-585.888	-378.577	-685.369	#NULL!	#NULL!	685.887	-658.619	161.255	-657.327	#NULL!	#NULL!	299.968	262.3	-330.779	-469.377	#NULL!	#NULL!	300.117	-475.783
420.287	-375.985	163.231	-589.935	#NULL!	#NULL!	-381.728	-232.882	-132.093	-507.024	#NULL!	#NULL!	430.952	-343.385	460.361	-741.337	#NULL!	#NULL!	-286.759	-698.432	-74.428	-254.019	#NULL!	#NULL!	220.738	-28.1756	514.878	-262.611	#NULL!	#NULL!	-462.356	-587.228	-406.927	-685.312	#NULL!	#NULL!	671.088	-658.59	156.331	-657.327	#NULL!	#NULL!	328.918	266.879	-335.703	-469.377	#NULL!	#NULL!	295.16	-475.748
417.824	-377.141	244.406	-587.925	#NULL!	#NULL!	-386.645	-232.863	-122.857	-504.726	#NULL!	#NULL!	639.182	-343.447	613.77	-739.823	#NULL!	#NULL!	-291.687	-698.403	-78.134	-255.565	#NULL!	#NULL!	175.319	-28.0404	556.608	-260.662	#NULL!	#NULL!	-466.626	-586.201	-323.474	-683.447	#NULL!	#NULL!	666.155	-658.581	151.407	-657.327	#NULL!	#NULL!	298.086	266.939	-339.396	-469.377	#NULL!	#NULL!	290.822	-475.718
283.858	-375.05	239.487	-587.906	#NULL!	#NULL!	-352.218	-230.28	-127.161	-504.709	#NULL!	#NULL!	605.915	-343.249	608.842	-739.796	#NULL!	#NULL!	-157.993	-696.848	-67.0086	-249.751	#NULL!	#NULL!	169.975	-28.0246	552.329	-260.654	#NULL!	#NULL!	-509.373	-586.073	-331.498	-683.431	#NULL!	#NULL!	661.222	-658.571	146.483	-657.327	#NULL!	#NULL!	330.778	271.511	-365.245	-468.991	#NULL!	#NULL!	285.878	-473.365
277.711	-375.414	234.568	-587.886	#NULL!	#NULL!	-359.585	-228.308	-121.603	-500.062	#NULL!	#NULL!	597.291	-343.198	603.913	-739.769	#NULL!	#NULL!	-247.326	-697.492	-71.9369	-249.725	#NULL!	#NULL!	152.876	-27.9737	548.05	-260.645	#NULL!	#NULL!	-512.579	-586.064	-357.708	-683.379	#NULL!	#NULL!	656.905	-658.563	141.56	-657.327	#NULL!	#NULL!	299.329	271.572	-370.785	-469.377	#NULL!	#NULL!	300.143	-471.148
275.248	-376.57	229.649	-587.866	#NULL!	#NULL!	-364.501	-228.288	-125.292	-500.047	#NULL!	#NULL!	592.369	-341.995	598.985	-739.742	#NULL!	#NULL!	-251.022	-697.47	-76.8653	-249.698	#NULL!	#NULL!	262.425	-26.2705	510.072	-260.57	#NULL!	#NULL!	-406.237	-584.351	-365.731	-683.363	#NULL!	#NULL!	644.779	-658.153	136.636	-657.327	#NULL!	#NULL!	333.254	276.142	-283.588	-466.67	#NULL!	#NULL!	295.186	-471.113
227.317	-375.212	224.73	-587.846	#NULL!	#NULL!	-369.418	-228.269	-122.808	-495.387	#NULL!	#NULL!	442.669	-341.106	594.057	-739.716	#NULL!	#NULL!	-304.612	-695.978	-72.5237	-245.022	#NULL!	#NULL!	241.047	-27.2215	483.862	-260.518	#NULL!	#NULL!	-449.523	-585.237	-241.09	-681.241	#NULL!	#NULL!	740.156	-656.407	131.712	-657.327	#NULL!	#NULL!	303.038	276.201	-311.079	-466.67	#NULL!	#NULL!	290.848	-471.082
271.577	-372.67	219.811	-587.827	#NULL!	#NULL!	-374.334	-228.249	-124.013	-490.712	#NULL!	#NULL!	635.498	-341.077	589.128	-739.689	#NULL!	#NULL!	-267.021	-693.852	-64.0874	-242.327	#NULL!	#NULL!	234.635	-27.2024	544.137	-258.268	#NULL!	#NULL!	-392.87	-582.362	-246.44	-681.569	#NULL!	#NULL!	710.558	-656.349	128.023	-655.007	#NULL!	#NULL!	330.057	280.784	-316.003	-467.057	#NULL!	#NULL!	285.904	-468.73
237.155	-374.086	214.892	-587.807	#NULL!	#NULL!	-379.25	-228.229	-128.317	-490.694	#NULL!	#NULL!	630.569	-341.047	584.2	-739.662	#NULL!	#NULL!	-271.949	-693.823	-64.4785	-239.192	#NULL!	#NULL!	231.429	-27.1928	513.825	-258.546	#NULL!	#NULL!	-445.236	-582.206	-257.138	-681.547	#NULL!	#NULL!	680.959	-656.292	174.804	-652.687	#NULL!	#NULL!	304.898	280.833	-303.69	-464.737	#NULL!	#NULL!	300.17	-466.512
232.244	-372.901	182.919	-587.679	#NULL!	#NULL!	-384.167	-228.209	-123.988	-486.042	#NULL!	#NULL!	486.421	-339.017	579.272	-739.635	#NULL!	#NULL!	-276.877	-693.794	-69.3996	-237.99	#NULL!	#NULL!	216.473	-25.7955	553.416	-256.593	#NULL!	#NULL!	-453.785	-582.18	-274.967	-681.173	#NULL!	#NULL!	676.026	-656.282	169.88	-652.687	#NULL!	#NULL!	312.065	285.454	-328.309	-464.737	#NULL!	#NULL!	295.212	-466.477
222.411	-372.861	178	-587.659	#NULL!	#NULL!	-387.859	-229.361	-128.907	-486.022	#NULL!	#NULL!	450.69	-338.805	524.444	-739.337	#NULL!	#NULL!	-281.806	-693.765	-60.753	-234.513	#NULL!	#NULL!	210.059	-26.1146	549.137	-256.585	#NULL!	#NULL!	-459.128	-582.164	-379.095	-681.305	#NULL!	#NULL!	730.293	-655.229	164.956	-652.687	#NULL!	#NULL!	322.388	289.684	-333.235	-465.897	#NULL!	#NULL!	291.494	-466.451
416.619	-371.307	173.081	-587.639	#NULL!	#NULL!	-344.824	-225.647	-123.349	-481.374	#NULL!	#NULL!	437.137	-338.725	513.973	-738.888	#NULL!	#NULL!	-287.966	-693.728	-70.6024	-233.285	#NULL!	#NULL!	185.48	-26.0415	509.912	-256.168	#NULL!	#NULL!	-461.27	-583.173	-268.897	-679.493	#NULL!	#NULL!	726.593	-655.222	160.032	-652.687	#NULL!	#NULL!	335.519	294.68	-336.928	-465.897	#NULL!	#NULL!	285.311	-464.09
282.647	-370.771	158.939	-587.583	#NULL!	#NULL!	-350.971	-226.011	-128.883	-481.352	#NULL!	#NULL!	429.738	-339.855	507.81	-739.246	#NULL!	#NULL!	-292.895	-693.699	-66.8988	-232.13	#NULL!	#NULL!	128.84	-25.8729	481.735	-257.466	#NULL!	#NULL!	-467.678	-582.139	-323.457	-679.384	#NULL!	#NULL!	714.262	-654.039	155.109	-652.687	#NULL!	#NULL!	326.368	299.334	-360.313	-464.35	#NULL!	#NULL!	297.717	-461.859
277.73	-370.751	253.027	-585.625	#NULL!	#NULL!	-355.888	-225.991	-132.572	-481.337	#NULL!	#NULL!	626.885	-338.677	502.882	-739.219	#NULL!	#NULL!	-295.365	-694.858	-61.9485	-228.633	#NULL!	#NULL!	178.003	-25.0046	544.862	-255.561	#NULL!	#NULL!	-469.819	-583.147	-331.481	-679.369	#NULL!	#NULL!	705.63	-653.636	150.185	-652.687	#NULL!	#NULL!	330.803	303.574	-366.468	-464.737	#NULL!	#NULL!	290.901	-461.811
227.339	-370.161	248.108	-585.605	#NULL!	#NULL!	-337.441	-223.734	-121.478	-476.322	#NULL!	#NULL!	621.963	-337.474	497.954	-739.192	#NULL!	#NULL!	-157.358	-693.329	-66.8598	-225.865	#NULL!	#NULL!	157.698	-24.9441	551.293	-252.526	#NULL!	#NULL!	-494.929	-582.058	-357.691	-679.316	#NULL!	#NULL!	699.463	-654.01	145.261	-652.687	#NULL!	#NULL!	338.871	308.58	-370.777	-464.737	#NULL!	#NULL!	280.366	-461.737
413.556	-368.964	209.988	-585.063	#NULL!	#NULL!	-362.023	-223.635	-127.628	-476.687	#NULL!	#NULL!	591.777	-337.294	493.025	-739.165	#NULL!	#NULL!	-220.195	-692.956	-70.5658	-227.411	#NULL!	#NULL!	120.299	-23.8182	547.014	-252.518	#NULL!	#NULL!	-511.498	-583.023	-362.505	-679.307	#NULL!	#NULL!	694.53	-654	140.337	-652.687	#NULL!	#NULL!	342.395	313.209	-281.527	-462.03	#NULL!	#NULL!	285.337	-459.454
271.595	-368.395	203.837	-585.428	#NULL!	#NULL!	-366.325	-223.618	-131.932	-476.67	#NULL!	#NULL!	587.465	-337.269	488.097	-739.139	#NULL!	#NULL!	-225.118	-691.753	-61.9119	-222.759	#NULL!	#NULL!	85.0281	-24.7279	510.641	-252.446	#NULL!	#NULL!	-498.303	-579.68	-397.274	-679.238	#NULL!	#NULL!	689.597	-653.991	135.413	-652.687	#NULL!	#NULL!	348.757	318.219	-285.223	-463.577	#NULL!	#NULL!	295.258	-458.365
221.201	-368.193	197.688	-585.403	#NULL!	#NULL!	-381.689	-223.556	-116.536	-472.061	#NULL!	#NULL!	424.828	-336.303	483.169	-739.112	#NULL!	#NULL!	-230.046	-691.724	-66.8329	-221.557	#NULL!	#NULL!	253.888	-23.2012	507.431	-252.439	#NULL!	#NULL!	-504.004	-580.002	-237.865	-677.523	#NULL!	#NULL!	684.664	-653.981	130.49	-652.687	#NULL!	#NULL!	340.38	322.484	-307.994	-462.416	#NULL!	#NULL!	290.927	-457.176
409.264	-366.615	193.993	-586.556	#NULL!	#NULL!	-385.376	-223.542	-121.455	-472.042	#NULL!	#NULL!	635.528	-335.206	478.24	-739.085	#NULL!	#NULL!	-233.742	-691.702	-70.5365	-222.712	#NULL!	#NULL!	249.613	-23.1885	550.236	-249.478	#NULL!	#NULL!	-507.211	-579.992	-245.352	-677.17	#NULL!	#NULL!	671.098	-653.568	155.117	-648.046	#NULL!	#NULL!	348.922	327.103	-314.148	-462.416	#NULL!	#NULL!	280.392	-457.102
281.437	-366.103	186.62	-585.359	#NULL!	#NULL!	-342.348	-221.382	-126.374	-472.022	#NULL!	#NULL!	482.743	-335.473	474.537	-740.24	#NULL!	#NULL!	-257.15	-691.171	-61.8753	-216.885	#NULL!	#NULL!	241.064	-23.163	544.891	-248.451	#NULL!	#NULL!	-514.691	-579.97	-249.637	-678.515	#NULL!	#NULL!	664.931	-653.943	150.194	-648.046	#NULL!	#NULL!	363.584	331.71	-303.27	-459.709	#NULL!	#NULL!	285.363	-454.819
276.521	-366.083	168.176	-584.895	#NULL!	#NULL!	-347.264	-221.363	-130.678	-472.005	#NULL!	#NULL!	450.714	-334.108	468.384	-739.031	#NULL!	#NULL!	-263.312	-691.526	-66.8037	-216.858	#NULL!	#NULL!	215.415	-23.0867	506.379	-248.375	#NULL!	#NULL!	-392.853	-578.303	-256.586	-677.486	#NULL!	#NULL!	659.998	-653.933	145.27	-648.046	#NULL!	#NULL!	369.76	336.334	-355.381	-460.096	#NULL!	#NULL!	295.29	-452.571
223.669	-365.872	162.025	-585.26	#NULL!	#NULL!	-352.181	-221.343	-117.126	-467.389	#NULL!	#NULL!	434.697	-334.013	573.128	-736.861	#NULL!	#NULL!	-305.203	-691.277	-64.9262	-212.169	#NULL!	#NULL!	209.003	-23.0676	504.235	-249.386	#NULL!	#NULL!	-444.15	-578.15	-272.633	-677.454	#NULL!	#NULL!	655.065	-653.923	140.346	-648.046	#NULL!	#NULL!	360.931	340.987	-360.305	-460.096	#NULL!	#NULL!	290.953	-452.54
414.186	-365.469	241.974	-582.856	#NULL!	#NULL!	-357.097	-221.323	-122.66	-467.367	#NULL!	#NULL!	620.755	-332.77	566.965	-737.219	#NULL!	#NULL!	-269.459	-688.75	-65.4984	-205.118	#NULL!	#NULL!	199.385	-23.039	494.612	-248.013	#NULL!	#NULL!	-462.317	-578.096	-379.078	-677.243	#NULL!	#NULL!	652.596	-655.078	135.422	-648.046	#NULL!	#NULL!	356.379	346.017	-365.229	-460.096	#NULL!	#NULL!	280.418	-452.466
404.358	-364.264	235.823	-583.221	#NULL!	#NULL!	-337.421	-219.071	-126.355	-468.519	#NULL!	#NULL!	589.953	-332.587	562.037	-737.192	#NULL!	#NULL!	-275.621	-689.105	-63.0122	-201.607	#NULL!	#NULL!	195.111	-23.0263	491.397	-249.361	#NULL!	#NULL!	-470.867	-578.071	-268.88	-675.43	#NULL!	#NULL!	643.966	-653.902	131.114	-648.046	#NULL!	#NULL!	356.476	350.267	-369.537	-460.096	#NULL!	#NULL!	276.694	-453.599
272.435	-363.347	230.904	-583.201	#NULL!	#NULL!	-362.002	-218.584	-131.274	-468.5	#NULL!	#NULL!	582.561	-332.543	557.109	-737.165	#NULL!	#NULL!	-280.549	-689.075	-67.9406	-201.58	#NULL!	#NULL!	185.854	-21.6459	541.156	-246.413	#NULL!	#NULL!	-498.11	-575.961	-323.44	-675.322	#NULL!	#NULL!	640.266	-653.895	156.357	-643.019	#NULL!	#NULL!	365.77	354.884	-276.595	-457.389	#NULL!	#NULL!	285.391	-449.797
408.055	-361.947	225.985	-583.181	#NULL!	#NULL!	-365.696	-220.123	-118.946	-462.712	#NULL!	#NULL!	475.985	-331.91	553.412	-737.145	#NULL!	#NULL!	-285.478	-689.046	-59.294	-198.103	#NULL!	#NULL!	182.286	-22.9881	533.667	-246.398	#NULL!	#NULL!	-507.193	-575.934	-330.929	-675.307	#NULL!	#NULL!	629.164	-655.032	150.202	-643.405	#NULL!	#NULL!	362.723	359.912	-282.135	-457.776	#NULL!	#NULL!	292.831	-449.077
401.295	-361.92	221.066	-583.162	#NULL!	#NULL!	-381.669	-218.893	-123.865	-462.692	#NULL!	#NULL!	421.772	-331.588	463.47	-736.655	#NULL!	#NULL!	-290.406	-689.017	-62.961	-193.383	#NULL!	#NULL!	129.921	-22.8322	474.293	-246.28	#NULL!	#NULL!	-511.468	-575.921	-353.93	-675.261	#NULL!	#NULL!	625.464	-655.025	145.278	-643.405	#NULL!	#NULL!	369.817	363.761	-285.215	-458.936	#NULL!	#NULL!	277.966	-447.813
277.77	-361.425	216.147	-583.142	#NULL!	#NULL!	-385.362	-220.044	-118.919	-457.652	#NULL!	#NULL!	633.088	-330.495	610.103	-735.104	#NULL!	#NULL!	-294.108	-690.169	-67.2733	-193.36	#NULL!	#NULL!	74.3498	-22.6668	537.421	-244.035	#NULL!	#NULL!	-514.678	-576.926	-361.418	-675.246	#NULL!	#NULL!	740.166	-651.771	140.354	-643.405	#NULL!	#NULL!	377.227	368.769	-293.824	-455.069	#NULL!	#NULL!	287.894	-445.565
222.46	-361.204	180.484	-582.999	#NULL!	#NULL!	-344.785	-216.321	-125.07	-458.017	#NULL!	#NULL!	450.33	-329.018	605.175	-735.077	#NULL!	#NULL!	-228.789	-687.034	-61.707	-189.866	#NULL!	#NULL!	121.38	-20.7776	520.303	-244.34	#NULL!	#NULL!	-442.53	-574.097	-386.024	-675.198	#NULL!	#NULL!	736.466	-651.764	135.431	-643.405	#NULL!	#NULL!	369.657	373.419	-299.98	-455.455	#NULL!	#NULL!	282.936	-445.53
271.636	-358.681	175.565	-582.979	#NULL!	#NULL!	-350.932	-216.685	-129.977	-455.662	#NULL!	#NULL!	433.483	-330.483	600.246	-735.05	#NULL!	#NULL!	-233.102	-687.009	-66.0119	-188.668	#NULL!	#NULL!	77.5643	-20.6472	494.628	-244.289	#NULL!	#NULL!	-464.438	-574.032	-391.908	-675.186	#NULL!	#NULL!	678.503	-651.265	130.507	-643.405	#NULL!	#NULL!	371.387	377.665	-303.675	-456.615	#NULL!	#NULL!	278.407	-442.795
267.942	-360.22	157.119	-582.905	#NULL!	#NULL!	-355.848	-216.665	-116.437	-453.382	#NULL!	#NULL!	620.78	-328.073	595.318	-735.023	#NULL!	#NULL!	-236.188	-688.164	-57.358	-184.016	#NULL!	#NULL!	56.7294	-19.5705	490.349	-244.28	#NULL!	#NULL!	-468.178	-574.02	-395.652	-675.178	#NULL!	#NULL!	649.315	-651.208	128.043	-644.565	#NULL!	#NULL!	371.768	382.686	-355.372	-455.069	#NULL!	#NULL!	285.441	-440.912
406.847	-356.89	249.362	-580.94	#NULL!	#NULL!	-337.4	-214.019	-121.356	-453.362	#NULL!	#NULL!	591.21	-327.897	590.39	-734.997	#NULL!	#NULL!	-252.199	-686.895	-60.4456	-185.174	#NULL!	#NULL!	54.0534	-20.5772	533.149	-242.334	#NULL!	#NULL!	-502.376	-573.919	-398.331	-676.189	#NULL!	#NULL!	710.572	-649.396	158.827	-638.764	#NULL!	#NULL!	379.038	387.308	-361.527	-455.455	#NULL!	#NULL!	280.499	-438.173
403.153	-358.43	210.01	-580.782	#NULL!	#NULL!	-361.573	-213.922	-126.275	-453.342	#NULL!	#NULL!	581.353	-327.839	585.461	-734.97	#NULL!	#NULL!	-257.127	-686.866	-65.9827	-183.969	#NULL!	#NULL!	43.3666	-20.5454	472.705	-242.214	#NULL!	#NULL!	-394.965	-572.209	-236.777	-673.124	#NULL!	#NULL!	705.639	-649.386	153.904	-638.764	#NULL!	#NULL!	387.758	391.926	-365.836	-455.455	#NULL!	#NULL!	274.92	-438.521
225.349	-356.164	205.091	-580.763	#NULL!	#NULL!	-377.967	-215.411	-116.41	-448.322	#NULL!	#NULL!	472.929	-327.195	580.533	-734.943	#NULL!	#NULL!	-262.062	-688.011	-60.9811	-172.248	#NULL!	#NULL!	35.3558	-19.5069	537.437	-240.311	#NULL!	#NULL!	-438.78	-571.741	-239.992	-674.472	#NULL!	#NULL!	700.706	-649.377	148.98	-638.764	#NULL!	#NULL!	385.918	396.565	-274.125	-453.135	#NULL!	#NULL!	287.946	-436.294
274.112	-354.416	200.172	-580.743	#NULL!	#NULL!	-344.767	-212.047	-121.947	-448.689	#NULL!	#NULL!	429.799	-328.113	523.857	-734.634	#NULL!	#NULL!	-270.668	-684.437	-66.5255	-172.218	#NULL!	#NULL!	235.737	-19.0887	516.576	-240.27	#NULL!	#NULL!	-446.796	-572.055	-247.476	-673.442	#NULL!	#NULL!	695.773	-649.367	144.056	-638.764	#NULL!	#NULL!	385.311	401.202	-279.049	-453.135	#NULL!	#NULL!	291.677	-434.002
269.195	-354.397	196.483	-580.728	#NULL!	#NULL!	-349.683	-212.027	-126.257	-449.84	#NULL!	#NULL!	426.109	-326.917	518.929	-734.607	#NULL!	#NULL!	-274.371	-685.589	-56.6615	-171.097	#NULL!	#NULL!	223.982	-19.0537	497.854	-240.233	#NULL!	#NULL!	-499.696	-571.898	-251.755	-673.433	#NULL!	#NULL!	690.84	-649.357	139.132	-638.764	#NULL!	#NULL!	387.17	405.834	-317.824	-453.135	#NULL!	#NULL!	281.762	-433.933
264.279	-354.377	185.415	-580.684	#NULL!	#NULL!	-354.599	-212.007	-130.555	-448.655	#NULL!	#NULL!	418.711	-328.047	514	-734.581	#NULL!	#NULL!	-279.293	-684.386	-61.5679	-167.546	#NULL!	#NULL!	220.776	-19.0441	493.575	-240.224	#NULL!	#NULL!	-506.642	-571.877	-256.039	-674.44	#NULL!	#NULL!	685.907	-649.348	134.208	-638.764	#NULL!	#NULL!	392.833	410.845	-283.353	-450.815	#NULL!	#NULL!	276.805	-433.898
232.322	-354.249	171.273	-580.627	#NULL!	#NULL!	-334.513	-209.368	-116.394	-445.209	#NULL!	#NULL!	633.113	-325.798	509.072	-734.554	#NULL!	#NULL!	-284.221	-684.357	-56.6103	-162.873	#NULL!	#NULL!	213.295	-19.0219	489.831	-240.217	#NULL!	#NULL!	-510.387	-572.88	-374.782	-673.189	#NULL!	#NULL!	671.107	-649.319	129.284	-638.764	#NULL!	#NULL!	396.501	415.087	-290.943	-450.428	#NULL!	#NULL!	274.32	-435.04
217.573	-354.19	244.456	-578.585	#NULL!	#NULL!	-359.504	-209.268	-132.375	-443.978	#NULL!	#NULL!	451.989	-325.897	504.144	-734.527	#NULL!	#NULL!	-288.534	-684.331	-49.0421	-134.72	#NULL!	#NULL!	209.02	-19.0092	471.118	-238.149	#NULL!	#NULL!	-451.597	-570.011	-266.189	-671.373	#NULL!	#NULL!	666.174	-649.309	125.589	-639.925	#NULL!	#NULL!	397.99	419.72	-296.28	-451.975	#NULL!	#NULL!	286.746	-429.332
409.323	-352.626	239.537	-578.566	#NULL!	#NULL!	-365.652	-209.631	-136.679	-443.96	#NULL!	#NULL!	447.061	-325.867	499.215	-734.5	#NULL!	#NULL!	-209.46	-682.061	-37.924	-130.081	#NULL!	#NULL!	205.814	-18.9996	467.373	-238.141	#NULL!	#NULL!	-455.872	-569.999	-324.493	-671.257	#NULL!	#NULL!	661.241	-649.3	158.836	-634.124	#NULL!	#NULL!	398.307	423.969	-299.973	-451.975	#NULL!	#NULL!	281.788	-429.297
405.636	-352.611	234.618	-578.546	#NULL!	#NULL!	-374.87	-209.595	-112.059	-439.389	#NULL!	#NULL!	619.566	-324.543	494.287	-734.473	#NULL!	#NULL!	-220.138	-681.997	-46.5486	-130.034	#NULL!	#NULL!	184.441	-18.936	537.454	-236.249	#NULL!	#NULL!	-460.146	-569.986	-328.237	-671.25	#NULL!	#NULL!	656.308	-649.29	153.912	-634.124	#NULL!	#NULL!	395.748	428.609	-350.439	-450.428	#NULL!	#NULL!	276.831	-429.262
227.416	-351.898	229.699	-578.526	#NULL!	#NULL!	-377.948	-210.748	-133.58	-439.303	#NULL!	#NULL!	591.228	-324.375	489.358	-734.446	#NULL!	#NULL!	-232.467	-683.49	-50.2376	-128.839	#NULL!	#NULL!	101.084	-18.6879	514.984	-237.22	#NULL!	#NULL!	-464.421	-569.973	-352.843	-671.201	#NULL!	#NULL!	640.273	-650.418	148.988	-634.124	#NULL!	#NULL!	398.944	433.625	-356.595	-450.815	#NULL!	#NULL!	274.346	-430.404
222.499	-351.878	224.78	-578.506	#NULL!	#NULL!	-347.204	-206.985	-138.499	-439.283	#NULL!	#NULL!	580.145	-323.135	485.046	-734.423	#NULL!	#NULL!	-253.407	-682.191	-54.5425	-127.641	#NULL!	#NULL!	40.1691	-18.5066	494.662	-236.164	#NULL!	#NULL!	-435.024	-568.032	-358.192	-671.19	#NULL!	#NULL!	740.176	-647.136	144.064	-634.124	#NULL!	#NULL!	397.515	438.65	-361.519	-450.815	#NULL!	#NULL!	285.534	-424.302
281.506	-349.783	219.861	-578.487	#NULL!	#NULL!	-353.351	-207.349	-111.42	-434.721	#NULL!	#NULL!	471.721	-322.491	479.502	-734.393	#NULL!	#NULL!	-255.877	-683.351	-46.5193	-125.335	#NULL!	#NULL!	200.483	-15.9399	490.383	-236.155	#NULL!	#NULL!	-447.314	-567.995	-383.332	-671.14	#NULL!	#NULL!	735.242	-647.126	139.141	-634.124	#NULL!	#NULL!	400.812	442.506	-365.214	-451.975	#NULL!	#NULL!	279.336	-424.644
276.59	-349.763	214.942	-578.467	#NULL!	#NULL!	-370.563	-208.446	-115.115	-435.874	#NULL!	#NULL!	442.145	-323.49	475.189	-734.369	#NULL!	#NULL!	-279.269	-679.689	-51.0199	-122.569	#NULL!	#NULL!	181.243	-16.8972	479.685	-236.134	#NULL!	#NULL!	-500.39	-567.499	-234.263	-669.067	#NULL!	#NULL!	680.978	-647.02	134.217	-634.124	#NULL!	#NULL!	410.416	447.896	-274.117	-448.494	#NULL!	#NULL!	274.378	-424.61
271.673	-349.743	180.509	-578.329	#NULL!	#NULL!	-329.986	-204.723	-133.555	-434.633	#NULL!	#NULL!	437.223	-322.286	468.413	-734.332	#NULL!	#NULL!	-283.581	-679.664	-48.9396	-118.273	#NULL!	#NULL!	176.968	-16.8845	475.94	-236.127	#NULL!	#NULL!	-505.026	-568.838	-237.835	-670.414	#NULL!	#NULL!	676.045	-647.011	129.908	-634.124	#NULL!	#NULL!	413.062	452.14	-279.041	-448.494	#NULL!	#NULL!	285.561	-419.666
266.757	-349.724	175.59	-578.309	#NULL!	#NULL!	-336.133	-205.087	-137.859	-434.615	#NULL!	#NULL!	423.053	-322.202	575.619	-732.567	#NULL!	#NULL!	-305.149	-680.71	-52.6432	-119.428	#NULL!	#NULL!	172.694	-16.8718	487.717	-234.119	#NULL!	#NULL!	-438.76	-567.006	-246.924	-669.38	#NULL!	#NULL!	651.38	-646.963	158.844	-629.483	#NULL!	#NULL!	411.941	456.778	-316.585	-448.494	#NULL!	#NULL!	279.362	-420.009
263.07	-349.709	249.387	-576.27	#NULL!	#NULL!	-341.05	-205.067	-111.395	-430.051	#NULL!	#NULL!	416.277	-322.162	570.691	-732.54	#NULL!	#NULL!	-207.793	-677.374	-43.9942	-115.559	#NULL!	#NULL!	168.419	-16.8591	471.135	-234.086	#NULL!	#NULL!	-451.58	-565.953	-370.486	-669.135	#NULL!	#NULL!	647.063	-646.955	153.921	-629.483	#NULL!	#NULL!	414.417	461.022	-319.664	-449.654	#NULL!	#NULL!	274.404	-419.974
232.337	-350.752	210.035	-576.112	#NULL!	#NULL!	-359.485	-204.605	-115.699	-430.034	#NULL!	#NULL!	629.441	-321.079	565.763	-732.513	#NULL!	#NULL!	-213.956	-677.729	-50.5507	-113.174	#NULL!	#NULL!	162.02	-13.7962	466.855	-234.077	#NULL!	#NULL!	-455.854	-565.94	-263.498	-667.316	#NULL!	#NULL!	730.315	-644.412	148.997	-629.483	#NULL!	#NULL!	403.324	464.134	-283.96	-446.174	#NULL!	#NULL!	270.067	-419.944
218.004	-349.14	205.116	-576.093	#NULL!	#NULL!	-363.179	-206.144	-120.606	-427.68	#NULL!	#NULL!	611.576	-320.973	559.602	-732.479	#NULL!	#NULL!	-218.884	-677.699	-41.5031	-111.265	#NULL!	#NULL!	-100.875	-13.0137	463.111	-234.07	#NULL!	#NULL!	-459.595	-565.929	-318.056	-666.869	#NULL!	#NULL!	726.612	-645.95	144.073	-629.483	#NULL!	#NULL!	415.048	468.361	-288.884	-446.174	#NULL!	#NULL!	266.962	-421.081
406.885	-347.953	200.197	-576.073	#NULL!	#NULL!	-346.774	-202.324	-126.14	-427.657	#NULL!	#NULL!	577.077	-320.768	555.29	-732.456	#NULL!	#NULL!	-223.196	-677.674	-46.4169	-108.888	#NULL!	#NULL!	-131.867	-12.9215	492.535	-233.113	#NULL!	#NULL!	-464.408	-566.929	-323.406	-667.197	#NULL!	#NULL!	715.516	-644.384	139.149	-629.483	#NULL!	#NULL!	415.058	472.996	-347.969	-445.787	#NULL!	#NULL!	284.345	-415.408
401.978	-345.602	196.508	-576.058	#NULL!	#NULL!	-352.107	-203.857	-129.829	-427.642	#NULL!	#NULL!	464.335	-321.273	552.202	-733.614	#NULL!	#NULL!	-254.614	-677.487	-50.1204	-110.043	#NULL!	#NULL!	149.208	-10.7142	483.981	-232.08	#NULL!	#NULL!	-419.51	-563.681	-326.62	-668.206	#NULL!	#NULL!	709.348	-644.758	134.225	-629.483	#NULL!	#NULL!	426.701	477.223	-354.124	-446.174	#NULL!	#NULL!	279.388	-415.373
397.676	-345.585	185.44	-576.014	#NULL!	#NULL!	-325.05	-200.079	-116.289	-425.362	#NULL!	#NULL!	460.638	-321.251	464.115	-731.959	#NULL!	#NULL!	-291.577	-677.268	-41.4739	-106.566	#NULL!	#NULL!	144.934	-10.7015	479.697	-233.087	#NULL!	#NULL!	-431.978	-563.644	-350.151	-667.144	#NULL!	#NULL!	704.415	-644.748	129.302	-629.483	#NULL!	#NULL!	405.206	479.969	-359.048	-446.174	#NULL!	#NULL!	275.05	-415.343
280.297	-345.115	171.913	-575.96	#NULL!	#NULL!	-331.197	-200.443	-121.202	-424.175	#NULL!	#NULL!	434.783	-317.575	610.132	-730.405	#NULL!	#NULL!	-201.622	-675.453	-45.9744	-103.8	#NULL!	#NULL!	134.247	-10.6697	475.422	-232.063	#NULL!	#NULL!	-435.545	-564.986	-353.365	-668.153	#NULL!	#NULL!	699.482	-644.739	158.853	-624.842	#NULL!	#NULL!	426.798	484.562	-362.743	-447.334	#NULL!	#NULL!	269.473	-415.304
275.38	-345.095	149.369	-575.48	#NULL!	#NULL!	-336.114	-200.424	-126.115	-422.987	#NULL!	#NULL!	418.765	-317.48	605.204	-730.378	#NULL!	#NULL!	-296.493	-674.89	-38.9804	-101.88	#NULL!	#NULL!	131.041	-10.6601	488.264	-231.073	#NULL!	#NULL!	-441.957	-564.967	-357.64	-667.129	#NULL!	#NULL!	694.549	-644.729	153.929	-624.842	#NULL!	#NULL!	409.127	487.301	-274.107	-443.467	#NULL!	#NULL!	265.755	-415.278
270.464	-345.075	244.48	-573.915	#NULL!	#NULL!	-341.03	-200.404	-129.804	-422.973	#NULL!	#NULL!	412.605	-317.443	600.276	-730.351	#NULL!	#NULL!	-213.931	-673.032	-43.8941	-99.5038	#NULL!	#NULL!	101.118	-10.5711	471.153	-229.685	#NULL!	#NULL!	-446.228	-563.94	-365.128	-667.114	#NULL!	#NULL!	689.616	-644.72	149.005	-624.842	#NULL!	#NULL!	420.074	491.529	-280.263	-443.853	#NULL!	#NULL!	289.309	-414.284
266.162	-345.058	239.561	-573.896	#NULL!	#NULL!	-358.238	-200.335	-114.42	-420.699	#NULL!	#NULL!	612.216	-316.28	595.347	-730.324	#NULL!	#NULL!	-216.401	-674.191	-47.5904	-99.4837	#NULL!	#NULL!	-98.1866	-8.96327	465.803	-230.013	#NULL!	#NULL!	-468.67	-563.873	-377.966	-667.089	#NULL!	#NULL!	684.683	-644.71	144.082	-624.842	#NULL!	#NULL!	419.833	495.779	-340.58	-443.853	#NULL!	#NULL!	280.653	-410.747
263.084	-346.212	234.642	-573.876	#NULL!	#NULL!	-360.701	-201.491	-110.104	-418.382	#NULL!	#NULL!	576.485	-316.068	590.419	-730.298	#NULL!	#NULL!	-252.126	-672.805	-38.9511	-97.1812	#NULL!	#NULL!	-113.682	-8.91715	463.659	-231.024	#NULL!	#NULL!	-472.945	-563.86	-381.18	-668.098	#NULL!	#NULL!	671.118	-644.297	139.158	-624.842	#NULL!	#NULL!	421.59	500.797	-286.413	-441.146	#NULL!	#NULL!	275.696	-410.712
218.842	-344.869	229.723	-573.856	#NULL!	#NULL!	-345.942	-199.219	-126.09	-418.317	#NULL!	#NULL!	574.015	-317.227	585.491	-730.271	#NULL!	#NULL!	-256.438	-672.779	-42.6401	-95.9863	#NULL!	#NULL!	-131.854	-9.87769	519.301	-228.088	#NULL!	#NULL!	-476.151	-563.851	-232.465	-665.346	#NULL!	#NULL!	664.951	-644.672	134.234	-624.842	#NULL!	#NULL!	429.396	505.418	-290.108	-442.693	#NULL!	#NULL!	268.262	-410.273
216.378	-346.025	224.804	-573.837	#NULL!	#NULL!	-320.116	-195.825	-129.78	-418.303	#NULL!	#NULL!	466.829	-315.417	580.562	-730.244	#NULL!	#NULL!	-291.553	-672.571	-38.9219	-92.4822	#NULL!	#NULL!	126.774	-8.61818	516.092	-228.082	#NULL!	#NULL!	-496.456	-563.79	-235.674	-665.34	#NULL!	#NULL!	660.017	-644.662	129.31	-624.842	#NULL!	#NULL!	429.146	510.054	-307.34	-441.533	#NULL!	#NULL!	264.535	-411.792
202.863	-344.805	219.885	-573.817	#NULL!	#NULL!	-325.032	-195.805	-114.395	-416.029	#NULL!	#NULL!	455.734	-316.525	523.886	-729.935	#NULL!	#NULL!	-300.178	-672.52	-41.9875	-90.1159	#NULL!	#NULL!	104.332	-8.55138	500.045	-228.05	#NULL!	#NULL!	-426.983	-561.968	-245.837	-665.32	#NULL!	#NULL!	655.084	-644.652	125.002	-624.842	#NULL!	#NULL!	430.56	514.687	-345.498	-441.146	#NULL!	#NULL!	275.722	-406.076
207.791	-342.104	214.966	-573.797	#NULL!	#NULL!	-329.949	-195.785	-108.855	-414.884	#NULL!	#NULL!	570.75	-313.294	518.958	-729.908	#NULL!	#NULL!	-202.83	-670.749	-35.5899	-85.06	#NULL!	#NULL!	92.5767	-8.5164	495.419	-225.671	#NULL!	#NULL!	-455.842	-562.896	-368.334	-666.092	#NULL!	#NULL!	626.719	-644.597	158.862	-620.202	#NULL!	#NULL!	431.803	519.32	-351.654	-441.533	#NULL!	#NULL!	271.384	-406.046
401.998	-340.939	180.533	-573.659	#NULL!	#NULL!	-334.865	-195.766	-118.685	-413.288	#NULL!	#NULL!	565.403	-314.828	514.029	-729.882	#NULL!	#NULL!	-248.417	-670.479	-40.1174	-86.6017	#NULL!	#NULL!	123.581	-5.56481	469.029	-225.957	#NULL!	#NULL!	-459.048	-562.887	-260.27	-662.921	#NULL!	#NULL!	736.485	-642.493	153.938	-620.202	#NULL!	#NULL!	432.43	523.954	-356.578	-441.533	#NULL!	#NULL!	265.807	-406.007
397.082	-340.919	175.614	-573.639	#NULL!	#NULL!	-339.781	-195.746	-126.066	-413.647	#NULL!	#NULL!	460.065	-313.028	509.101	-729.855	#NULL!	#NULL!	-296.056	-669.804	-36.3918	-81.9228	#NULL!	#NULL!	119.306	-5.55209	464.75	-225.948	#NULL!	#NULL!	-379.957	-561.093	-263.485	-664.269	#NULL!	#NULL!	678.522	-641.994	149.014	-620.202	#NULL!	#NULL!	435.522	528.584	-360.886	-441.533	#NULL!	#NULL!	275.748	-401.441
392.165	-340.9	249.414	-571.211	#NULL!	#NULL!	-315.189	-193.513	-130.985	-413.628	#NULL!	#NULL!	449.592	-312.966	504.173	-729.828	#NULL!	#NULL!	-197.477	-668.041	-33.2165	-66.6678	#NULL!	#NULL!	115.566	-5.54095	516.105	-225.035	#NULL!	#NULL!	-420.028	-559.959	-314.831	-663.152	#NULL!	#NULL!	648.923	-641.936	144.09	-620.202	#NULL!	#NULL!	440.053	532.824	-274.099	-438.826	#NULL!	#NULL!	270.791	-401.406
272.942	-340.422	210.062	-571.053	#NULL!	#NULL!	-310.262	-190.812	-135.289	-413.61	#NULL!	#NULL!	426.798	-312.831	499.244	-729.801	#NULL!	#NULL!	-254.566	-668.094	-32.5784	-63.1469	#NULL!	#NULL!	109.684	-6.53807	460.481	-223.57	#NULL!	#NULL!	-431.254	-560.94	-323.389	-663.135	#NULL!	#NULL!	642.756	-642.311	139.166	-620.202	#NULL!	#NULL!	445.408	537.836	-280.254	-439.213	#NULL!	#NULL!	265.834	-401.371
268.64	-340.405	203.911	-571.418	#NULL!	#NULL!	-320.094	-190.773	-139.581	-411.258	#NULL!	#NULL!	418.79	-312.783	494.316	-729.774	#NULL!	#NULL!	-289.062	-667.497	-30.063	-54.937	#NULL!	#NULL!	89.9178	-5.46462	493.651	-221.943	#NULL!	#NULL!	-444.078	-560.902	-348.53	-663.085	#NULL!	#NULL!	730.324	-640.163	134.243	-620.202	#NULL!	#NULL!	438.018	542.486	-338.108	-438.826	#NULL!	#NULL!	277.014	-396.814
201.039	-340.134	198.992	-571.398	#NULL!	#NULL!	-326.241	-191.137	-106.371	-410.224	#NULL!	#NULL!	407.701	-312.717	489.388	-729.747	#NULL!	#NULL!	-229.499	-665.503	-26.3497	-52.2161	#NULL!	#NULL!	-144.661	-5.78109	465.837	-221.888	#NULL!	#NULL!	-450.486	-559.869	-357.623	-663.067	#NULL!	#NULL!	720.458	-640.144	129.319	-620.202	#NULL!	#NULL!	441.419	547.115	-286.405	-436.892	#NULL!	#NULL!	270.817	-396.77
218.871	-337.874	196.526	-572.556	#NULL!	#NULL!	-331.158	-191.117	-116.203	-409.017	#NULL!	#NULL!	630.722	-311.693	485.692	-729.727	#NULL!	#NULL!	-249.625	-665.775	-23.8562	-47.5305	#NULL!	#NULL!	-182.065	-5.66977	460.496	-219.846	#NULL!	#NULL!	-470.791	-559.808	-364.577	-663.053	#NULL!	#NULL!	715.524	-640.134	125.01	-620.202	#NULL!	#NULL!	442.662	551.748	-290.1	-438.053	#NULL!	#NULL!	265.86	-396.736
204.122	-337.815	185.467	-570.955	#NULL!	#NULL!	-336.074	-191.098	-121.122	-408.997	#NULL!	#NULL!	614.705	-311.598	479.531	-729.694	#NULL!	#NULL!	-296.032	-665.108	-27.5623	-49.0767	#NULL!	#NULL!	-185.267	-4.64562	456.217	-219.838	#NULL!	#NULL!	-479.344	-560.797	-379.019	-663.024	#NULL!	#NULL!	710.591	-640.125	158.87	-615.561	#NULL!	#NULL!	445.446	556.378	-303.023	-436.892	#NULL!	#NULL!	260.902	-396.701
399.559	-336.266	147.957	-571.193	#NULL!	#NULL!	-339.767	-192.249	-126.041	-408.977	#NULL!	#NULL!	561.725	-311.283	474.603	-729.667	#NULL!	#NULL!	-195.407	-664.922	-18.9011	-43.2499	#NULL!	#NULL!	-192.752	-5.63796	487.25	-217.868	#NULL!	#NULL!	-492.164	-559.745	-234.592	-662.295	#NULL!	#NULL!	705.658	-640.115	153.946	-615.561	#NULL!	#NULL!	445.456	561.014	-345.491	-436.892	#NULL!	#NULL!	256.578	-394.353
394.643	-336.247	242.045	-569.236	#NULL!	#NULL!	-358.193	-189.843	-130.966	-410.125	#NULL!	#NULL!	464.389	-310.705	469.674	-729.64	#NULL!	#NULL!	-252.693	-663.408	-22.6046	-44.4045	#NULL!	#NULL!	138.547	-4.59473	483.505	-217.861	#NULL!	#NULL!	-383.685	-558.038	-243.146	-661.263	#NULL!	#NULL!	700.725	-640.106	149.023	-615.561	#NULL!	#NULL!	447.315	565.646	-350.414	-436.892	#NULL!	#NULL!	270.843	-392.135
389.727	-336.227	237.126	-569.216	#NULL!	#NULL!	-307.785	-186.548	-135.879	-408.938	#NULL!	#NULL!	570.355	-310.16	575.649	-727.867	#NULL!	#NULL!	-284.112	-663.221	-26.9096	-43.2063	#NULL!	#NULL!	134.272	-4.58201	464.78	-218.839	#NULL!	#NULL!	-416.279	-557.941	-259.184	-659.199	#NULL!	#NULL!	695.792	-640.096	144.099	-615.561	#NULL!	#NULL!	457.314	570.262	-355.338	-436.892	#NULL!	#NULL!	265.886	-392.1
270.503	-335.75	232.207	-569.196	#NULL!	#NULL!	-312.702	-186.528	-116.178	-404.347	#NULL!	#NULL!	565.427	-310.131	570.72	-727.841	#NULL!	#NULL!	-289.046	-664.366	-20.1039	-38.5442	#NULL!	#NULL!	131.066	-4.57247	507.584	-215.877	#NULL!	#NULL!	-386.882	-555.999	-262.929	-659.192	#NULL!	#NULL!	690.859	-640.086	139.175	-615.561	#NULL!	#NULL!	459.05	574.508	-359.647	-436.892	#NULL!	#NULL!	260.928	-392.065
265.587	-335.73	227.288	-569.177	#NULL!	#NULL!	-317.618	-186.508	-121.097	-404.327	#NULL!	#NULL!	461.321	-308.339	565.792	-727.814	#NULL!	#NULL!	-157.194	-661.627	-25.6483	-38.514	#NULL!	#NULL!	82.9756	-4.42934	457.304	-215.777	#NULL!	#NULL!	-449.399	-555.475	-314.814	-659.089	#NULL!	#NULL!	685.926	-640.077	134.251	-615.561	#NULL!	#NULL!	446.312	577.623	-271.629	-434.572	#NULL!	#NULL!	257.223	-389.721
197.986	-335.459	222.369	-569.157	#NULL!	#NULL!	-322.534	-186.489	-111.247	-402.032	#NULL!	#NULL!	444.688	-308.24	560.864	-727.787	#NULL!	#NULL!	-208.948	-662.494	-29.9679	-39.6652	#NULL!	#NULL!	78.7009	-4.41662	453.559	-215.77	#NULL!	#NULL!	-475.583	-555.735	-321.768	-659.075	#NULL!	#NULL!	671.126	-640.048	129.327	-615.561	#NULL!	#NULL!	458.448	581.849	-276.553	-434.572	#NULL!	#NULL!	274.581	-388.684
193.684	-335.442	217.45	-569.137	#NULL!	#NULL!	-327.451	-186.469	-124.78	-403.145	#NULL!	#NULL!	424.975	-308.123	555.935	-727.76	#NULL!	#NULL!	-229.271	-661.199	-15.1462	-33.872	#NULL!	#NULL!	74.4262	-4.40389	503.857	-211.807	#NULL!	#NULL!	-490.544	-555.691	-346.373	-659.026	#NULL!	#NULL!	666.193	-640.038	125.634	-615.561	#NULL!	#NULL!	464.316	586.473	-281.477	-434.572	#NULL!	#NULL!	265.905	-388.623
217.662	-333.206	178.099	-568.979	#NULL!	#NULL!	-332.367	-186.45	-121.688	-399.655	#NULL!	#NULL!	416.35	-308.072	467.225	-727.277	#NULL!	#NULL!	-247.137	-661.093	-16.349	-29.1663	#NULL!	#NULL!	69.087	-3.37338	450.902	-211.702	#NULL!	#NULL!	-383.134	-553.981	-357.606	-659.004	#NULL!	#NULL!	661.26	-640.029	158.88	-610.533	#NULL!	#NULL!	465.436	591.106	-335.639	-434.572	#NULL!	#NULL!	260.954	-387.43
399.579	-331.603	174.409	-568.964	#NULL!	#NULL!	-337.284	-186.43	-109.993	-397.367	#NULL!	#NULL!	402.797	-307.991	610.154	-726.881	#NULL!	#NULL!	-279.171	-660.902	-15.9066	-24.0779	#NULL!	#NULL!	65.881	-3.36384	796.452	-211.373	#NULL!	#NULL!	-413.591	-553.891	-367.238	-660	#NULL!	#NULL!	656.327	-640.019	152.724	-610.92	#NULL!	#NULL!	478.432	595.717	-340.562	-434.572	#NULL!	#NULL!	257.869	-385.09
394.663	-331.584	245.747	-566.915	#NULL!	#NULL!	-341.586	-186.413	-122.278	-394.982	#NULL!	#NULL!	611.033	-306.879	605.233	-725.679	#NULL!	#NULL!	-297.659	-661.967	-7.68051	-22.1647	#NULL!	#NULL!	105.426	-2.46691	792.173	-211.364	#NULL!	#NULL!	-440.842	-553.809	-383.281	-658.953	#NULL!	#NULL!	637.211	-639.982	147.8	-610.92	#NULL!	#NULL!	454.777	595.763	-285.781	-432.252	#NULL!	#NULL!	258.515	-380.459
389.746	-331.564	212.546	-566.393	#NULL!	#NULL!	-347.105	-183.67	-137.035	-394.923	#NULL!	#NULL!	558.669	-306.568	600.305	-725.652	#NULL!	#NULL!	-251.437	-658.719	-13.8263	-19.7816	#NULL!	#NULL!	90.4648	-2.42239	788.963	-211.358	#NULL!	#NULL!	-481.452	-553.689	-228.152	-657.23	#NULL!	#NULL!	735.259	-639.014	142.876	-610.92	#NULL!	#NULL!	464.036	600.38	-299.937	-432.252	#NULL!	#NULL!	254.177	-380.428
386.059	-331.549	206.395	-566.758	#NULL!	#NULL!	-350.799	-185.21	-109.968	-392.697	#NULL!	#NULL!	629.52	-305.815	595.377	-725.625	#NULL!	#NULL!	-274.23	-658.583	-17.5299	-20.9363	#NULL!	#NULL!	-184.185	-1.60497	497.982	-209.764	#NULL!	#NULL!	-385.262	-551.946	-232.431	-657.221	#NULL!	#NULL!	725.395	-637.836	138.568	-610.92	#NULL!	#NULL!	481.997	604.981	-345.481	-431.865	#NULL!	#NULL!	272.78	-378.241
268.065	-331.077	201.476	-566.738	#NULL!	#NULL!	-305.307	-181.895	-135.78	-390.258	#NULL!	#NULL!	625.824	-305.793	590.448	-725.598	#NULL!	#NULL!	-158.408	-658.097	-8.89064	-18.6337	#NULL!	#NULL!	-192.735	-1.57953	494.772	-209.758	#NULL!	#NULL!	-418.396	-552.862	-235.64	-657.215	#NULL!	#NULL!	680.997	-637.749	133.029	-610.92	#NULL!	#NULL!	456.03	605.031	-351.637	-432.252	#NULL!	#NULL!	269.075	-375.897
263.148	-331.057	196.557	-566.718	#NULL!	#NULL!	-310.224	-181.875	-139.476	-391.411	#NULL!	#NULL!	458.882	-303.627	585.52	-725.572	#NULL!	#NULL!	-162.714	-656.897	-13.181	-15.086	#NULL!	#NULL!	101.16	-0.424975	477.655	-209.724	#NULL!	#NULL!	-436.559	-551.793	-242.594	-657.201	#NULL!	#NULL!	676.064	-637.74	128.105	-610.92	#NULL!	#NULL!	478.251	610.01	-355.945	-432.252	#NULL!	#NULL!	263.498	-375.858
259.461	-331.042	194.091	-567.876	#NULL!	#NULL!	-315.14	-181.855	-108.302	-387.644	#NULL!	#NULL!	454.563	-304.776	580.591	-725.545	#NULL!	#NULL!	-228.637	-657.68	-10.0349	-4.52998	#NULL!	#NULL!	81.9239	-0.367725	474.099	-207.347	#NULL!	#NULL!	-453.658	-551.742	-371.505	-656.945	#NULL!	#NULL!	651.399	-637.692	124.412	-610.92	#NULL!	#NULL!	459.12	608.502	-271.62	-429.931	#NULL!	#NULL!	258.541	-375.823
196.777	-330.791	187.951	-566.294	#NULL!	#NULL!	-320.057	-181.836	-107.459	-383.367	#NULL!	#NULL!	439.784	-303.514	551.638	-725.387	#NULL!	#NULL!	-247.112	-656.396	-6.32399	-2.2006	#NULL!	#NULL!	64.8293	0.697773	449.849	-207.637	#NULL!	#NULL!	-456.868	-552.747	-375.249	-656.938	#NULL!	#NULL!	647.082	-637.683	163.811	-606.279	#NULL!	#NULL!	487.635	614.241	-276.544	-429.931	#NULL!	#NULL!	254.203	-375.793
191.86	-330.772	181.8	-566.659	#NULL!	#NULL!	-324.973	-181.816	-112.378	-383.347	#NULL!	#NULL!	421.297	-304.579	526.372	-726.424	#NULL!	#NULL!	-277.298	-656.217	-0.126954	3.63962	#NULL!	#NULL!	61.6232	0.707315	445.57	-207.629	#NULL!	#NULL!	-477.169	-551.672	-260.237	-655.135	#NULL!	#NULL!	641.533	-637.673	158.887	-606.279	#NULL!	#NULL!	462.832	614.289	-281.47	-431.091	#NULL!	#NULL!	272.187	-373.601
217.681	-328.543	239.611	-564.556	#NULL!	#NULL!	-329.889	-181.796	-108.67	-379.859	#NULL!	#NULL!	416.99	-303.379	520.219	-725.216	#NULL!	#NULL!	-271.742	-653.901	5.46136	10.6579	#NULL!	#NULL!	53.6081	0.731169	438.081	-207.614	#NULL!	#NULL!	-485.718	-551.647	-312.657	-655.031	#NULL!	#NULL!	729.1	-635.525	151.502	-605.893	#NULL!	#NULL!	489.974	618.872	-287.619	-427.611	#NULL!	#NULL!	266.003	-371.24
397.141	-326.93	234.692	-564.536	#NULL!	#NULL!	-334.806	-181.777	-113.589	-379.839	#NULL!	#NULL!	609.825	-302.175	515.291	-725.189	#NULL!	#NULL!	-184.251	-652.072	22.1092	12.9169	#NULL!	#NULL!	49.3334	0.743892	494.789	-205.695	#NULL!	#NULL!	-489.459	-551.635	-320.146	-655.016	#NULL!	#NULL!	720.468	-635.122	145.347	-606.279	#NULL!	#NULL!	462.411	618.926	-292.542	-427.611	#NULL!	#NULL!	262.285	-371.214
392.224	-326.911	229.773	-564.516	#NULL!	#NULL!	-339.722	-181.757	-127.725	-378.615	#NULL!	#NULL!	554.381	-301.846	510.363	-725.162	#NULL!	#NULL!	-247.088	-651.699	20.9064	17.6226	#NULL!	#NULL!	77.6576	1.67421	491.045	-205.688	#NULL!	#NULL!	-415.181	-550.842	-344.216	-654.968	#NULL!	#NULL!	714.301	-635.496	140.423	-606.279	#NULL!	#NULL!	488.75	623.51	-296.237	-428.771	#NULL!	#NULL!	256.708	-371.175
388.537	-326.896	224.854	-564.497	#NULL!	#NULL!	-344.627	-179.017	-128.316	-373.943	#NULL!	#NULL!	451.501	-301.235	505.434	-725.136	#NULL!	#NULL!	-275.432	-652.705	15.978	17.6494	#NULL!	#NULL!	69.1082	1.69966	441.299	-205.589	#NULL!	#NULL!	-440.825	-549.751	-355.449	-654.946	#NULL!	#NULL!	709.368	-635.487	137.959	-607.439	#NULL!	#NULL!	462.235	623.562	-299.93	-428.771	#NULL!	#NULL!	266.029	-366.605
266.855	-326.409	219.935	-564.477	#NULL!	#NULL!	-348.321	-180.557	-128.291	-369.273	#NULL!	#NULL!	549.465	-299.468	500.506	-725.109	#NULL!	#NULL!	-296.988	-651.403	20.9381	22.7132	#NULL!	#NULL!	-96.5327	3.20726	475.541	-203.626	#NULL!	#NULL!	-481.435	-549.63	-385.404	-654.886	#NULL!	#NULL!	704.434	-635.477	131.806	-606.279	#NULL!	#NULL!	484.403	628.54	-344.243	-427.611	#NULL!	#NULL!	261.072	-366.57
261.939	-326.389	175.664	-564.299	#NULL!	#NULL!	-297.913	-177.261	-106.143	-367.027	#NULL!	#NULL!	455.826	-298.912	495.577	-725.082	#NULL!	#NULL!	-170.692	-650.979	15.3913	22.3518	#NULL!	#NULL!	-101.876	3.22316	471.262	-203.617	#NULL!	#NULL!	-403.413	-547.833	-228.135	-653.167	#NULL!	#NULL!	699.501	-635.467	126.882	-606.279	#NULL!	#NULL!	456.694	628.208	-349.166	-427.611	#NULL!	#NULL!	256.115	-366.535
258.247	-327.54	171.974	-564.285	#NULL!	#NULL!	-302.829	-177.242	-128.266	-364.603	#NULL!	#NULL!	435.496	-298.792	491.265	-725.058	#NULL!	#NULL!	-207.649	-649.585	20.9649	27.0206	#NULL!	#NULL!	-116.838	3.26769	448.796	-203.573	#NULL!	#NULL!	-436.542	-547.735	-233.484	-653.157	#NULL!	#NULL!	694.568	-635.458	121.959	-606.279	#NULL!	#NULL!	487.537	633.17	-354.09	-427.611	#NULL!	#NULL!	251.17	-364.182
193.109	-326.113	144.102	-563.784	#NULL!	#NULL!	-307.746	-177.222	-106.118	-362.357	#NULL!	#NULL!	427.9	-298.355	486.945	-726.21	#NULL!	#NULL!	-250.772	-649.329	16.0366	27.0475	#NULL!	#NULL!	-134.471	3.32017	444.517	-203.564	#NULL!	#NULL!	-448.832	-547.698	-242.042	-653.14	#NULL!	#NULL!	689.635	-635.448	162.589	-601.639	#NULL!	#NULL!	457.76	632.455	-356.554	-428.771	#NULL!	#NULL!	247.452	-364.156
188.807	-326.096	244.542	-562.241	#NULL!	#NULL!	-312.662	-177.202	-109.795	-360.007	#NULL!	#NULL!	415.783	-298.675	482.024	-725.008	#NULL!	#NULL!	-271.717	-649.205	21.6103	31.7163	#NULL!	#NULL!	62.7046	3.74796	437.743	-203.212	#NULL!	#NULL!	-452.576	-548.702	-371.13	-652.545	#NULL!	#NULL!	684.702	-635.439	157.665	-601.639	#NULL!	#NULL!	497.412	637.4	-272.843	-425.291	#NULL!	#NULL!	268.534	-361.986
217.701	-323.88	215.028	-562.122	#NULL!	#NULL!	-317.579	-177.183	-115.95	-361.15	#NULL!	#NULL!	409.006	-298.634	477.096	-724.981	#NULL!	#NULL!	-247.063	-647.003	17.2906	30.565	#NULL!	#NULL!	-52.7126	4.09146	494.806	-201.633	#NULL!	#NULL!	-473.946	-547.623	-374.702	-653.892	#NULL!	#NULL!	671.137	-635.026	152.741	-601.639	#NULL!	#NULL!	463.086	637.467	-275.307	-426.451	#NULL!	#NULL!	263.577	-361.952
392.244	-322.248	199.041	-562.058	#NULL!	#NULL!	-322.495	-177.163	-119.639	-361.135	#NULL!	#NULL!	623.403	-297.559	472.168	-724.954	#NULL!	#NULL!	-297.579	-646.702	21.0235	36.4186	#NULL!	#NULL!	-86.9061	5.20785	490.527	-201.624	#NULL!	#NULL!	-487.304	-547.583	-253.801	-651.085	#NULL!	#NULL!	664.97	-635.4	147.817	-601.639	#NULL!	#NULL!	485.969	642.058	-288.84	-422.583	#NULL!	#NULL!	258.619	-361.917
388.557	-322.233	194.122	-562.038	#NULL!	#NULL!	-327.411	-177.143	-125.78	-359.554	#NULL!	#NULL!	606.147	-298.631	456.143	-726.042	#NULL!	#NULL!	-204.544	-644.907	25.9665	38.7413	#NULL!	#NULL!	-110.421	4.26321	467.526	-201.579	#NULL!	#NULL!	-441.877	-545.689	-258.08	-651.077	#NULL!	#NULL!	660.037	-635.391	142.893	-601.639	#NULL!	#NULL!	455.49	642.117	-292.536	-424.13	#NULL!	#NULL!	249.546	-359.149
269.333	-321.756	189.203	-562.019	#NULL!	#NULL!	-332.328	-177.124	-129.477	-361.096	#NULL!	#NULL!	598.755	-298.587	575.678	-723.168	#NULL!	#NULL!	-269.227	-644.131	22.2848	41.111	#NULL!	#NULL!	-125.383	4.30774	428.479	-201.501	#NULL!	#NULL!	-444.019	-546.698	-261.294	-652.086	#NULL!	#NULL!	655.103	-635.381	137.97	-601.639	#NULL!	#NULL!	485.803	646.694	-347.927	-422.97	#NULL!	#NULL!	244.993	-360.662
264.417	-321.736	184.284	-561.999	#NULL!	#NULL!	-337.244	-177.104	-106.094	-357.687	#NULL!	#NULL!	593.832	-297.383	570.75	-723.142	#NULL!	#NULL!	-272.931	-645.675	25.9958	43.4403	#NULL!	#NULL!	-138.737	5.36211	487.322	-200.602	#NULL!	#NULL!	-383.625	-543.834	-311.036	-650.971	#NULL!	#NULL!	638.454	-635.349	133.046	-601.639	#NULL!	#NULL!	497.441	651.307	-352.851	-422.97	#NULL!	#NULL!	269.18	-357.355
260.725	-322.887	179.365	-561.979	#NULL!	#NULL!	-342.151	-174.753	-115.926	-356.48	#NULL!	#NULL!	544.549	-297.091	565.821	-723.115	#NULL!	#NULL!	-242.111	-642.335	22.3068	44.6352	#NULL!	#NULL!	-235.452	5.64995	479.839	-199.233	#NULL!	#NULL!	-404.465	-543.771	-321.734	-650.95	#NULL!	#NULL!	740.204	-633.229	129.353	-601.639	#NULL!	#NULL!	471.079	651.358	-356.543	-422.97	#NULL!	#NULL!	258.645	-357.281
213.409	-321.532	239.635	-559.886	#NULL!	#NULL!	-347.067	-174.733	-120.845	-356.46	#NULL!	#NULL!	449.678	-296.527	560.893	-723.088	#NULL!	#NULL!	-245.807	-642.313	26.0397	50.4888	#NULL!	#NULL!	-43.086	6.09205	474.488	-199.561	#NULL!	#NULL!	-436.529	-544.691	-343.13	-650.908	#NULL!	#NULL!	678.541	-632.723	161.366	-596.998	#NULL!	#NULL!	498.683	655.94	-271.192	-420.263	#NULL!	#NULL!	264.855	-355.007
190.671	-321.441	234.716	-559.866	#NULL!	#NULL!	-295.435	-172.608	-125.143	-355.275	#NULL!	#NULL!	602.463	-296.26	555.964	-723.061	#NULL!	#NULL!	-297.555	-642.006	43.3109	53.9192	#NULL!	#NULL!	-47.3565	7.11938	470.209	-199.553	#NULL!	#NULL!	-448.285	-544.656	-353.828	-650.886	#NULL!	#NULL!	648.943	-632.665	156.443	-596.998	#NULL!	#NULL!	472.579	655.991	-275.298	-421.81	#NULL!	#NULL!	253.703	-354.543
186.978	-322.592	229.797	-559.846	#NULL!	#NULL!	-300.351	-172.589	-129.453	-356.425	#NULL!	#NULL!	548.873	-294.768	469.102	-722.588	#NULL!	#NULL!	-266.74	-639.84	28.5331	55.1745	#NULL!	#NULL!	-58.0475	6.13658	464.325	-199.541	#NULL!	#NULL!	-469.654	-543.577	-385.387	-650.824	#NULL!	#NULL!	737.743	-630.906	151.519	-596.998	#NULL!	#NULL!	497.46	660.578	-281.447	-418.329	#NULL!	#NULL!	247.504	-354.885
207.888	-319.178	224.878	-559.827	#NULL!	#NULL!	-305.268	-172.569	-105.454	-353.019	#NULL!	#NULL!	434.907	-293.7	451.237	-722.491	#NULL!	#NULL!	-271.669	-639.811	29.8018	61.0415	#NULL!	#NULL!	-62.8524	7.1655	445.6	-200.52	#NULL!	#NULL!	-480.875	-543.544	-228.118	-649.105	#NULL!	#NULL!	727.876	-630.887	146.595	-596.998	#NULL!	#NULL!	471.15	660.629	-286.37	-418.329	#NULL!	#NULL!	245.019	-356.027
387.962	-317.568	219.959	-559.807	#NULL!	#NULL!	-310.184	-172.549	-110.976	-350.662	#NULL!	#NULL!	429.97	-295.236	605.263	-720.98	#NULL!	#NULL!	-275.981	-639.785	31.6865	66.9052	#NULL!	#NULL!	-71.9361	7.19254	441.32	-200.511	#NULL!	#NULL!	-485.684	-543.53	-231.862	-649.097	#NULL!	#NULL!	722.943	-630.878	141.671	-596.998	#NULL!	#NULL!	490.07	665.614	-291.294	-418.329	#NULL!	#NULL!	268.593	-351.557
263.207	-317.068	173.844	-559.622	#NULL!	#NULL!	-315.101	-172.529	-114.665	-350.647	#NULL!	#NULL!	412.721	-295.134	600.334	-720.953	#NULL!	#NULL!	-218.683	-638.952	29.8604	70.4395	#NULL!	#NULL!	-80.4898	6.20337	435.976	-199.485	#NULL!	#NULL!	-488.89	-543.52	-242.025	-649.077	#NULL!	#NULL!	719.241	-632.029	136.747	-596.998	#NULL!	#NULL!	464.171	665.278	-347.918	-417.943	#NULL!	#NULL!	264.881	-350.372
259.52	-317.053	146.174	-559.511	#NULL!	#NULL!	-320.017	-172.51	-107.274	-348.342	#NULL!	#NULL!	407.799	-293.93	595.406	-720.926	#NULL!	#NULL!	-242.086	-637.638	38.5508	80.9653	#NULL!	#NULL!	-95.9814	7.2641	431.697	-199.476	#NULL!	#NULL!	-432.242	-541.66	-368.262	-648.827	#NULL!	#NULL!	710.611	-630.854	131.823	-596.998	#NULL!	#NULL!	499.945	669.845	-352.844	-419.49	#NULL!	#NULL!	251.251	-349.889
190.69	-316.778	142.479	-560.664	#NULL!	#NULL!	-324.319	-172.493	-113.409	-345.593	#NULL!	#NULL!	403.486	-293.905	590.477	-720.899	#NULL!	#NULL!	-247.015	-637.609	34.8546	80.9855	#NULL!	#NULL!	-99.726	6.26063	424.209	-199.123	#NULL!	#NULL!	-444.532	-541.623	-238.807	-647.052	#NULL!	#NULL!	705.677	-630.844	126.9	-596.998	#NULL!	#NULL!	467.88	669.52	-356.535	-418.329	#NULL!	#NULL!	246.291	-350.241
183.311	-317.914	244.567	-557.571	#NULL!	#NULL!	-338.454	-172.436	-104.796	-344.849	#NULL!	#NULL!	393.014	-293.843	585.549	-720.873	#NULL!	#NULL!	-297.536	-638.483	39.1962	85.661	#NULL!	#NULL!	-116.825	6.31151	419.929	-199.453	#NULL!	#NULL!	-382.01	-540.794	-253.784	-647.023	#NULL!	#NULL!	700.744	-630.834	171.218	-594.678	#NULL!	#NULL!	499.955	674.48	-269.133	-416.009	#NULL!	#NULL!	253.753	-345.658
179.623	-317.899	215.053	-557.452	#NULL!	#NULL!	-295.415	-167.945	-120.783	-344.785	#NULL!	#NULL!	616.028	-293.993	580.621	-720.846	#NULL!	#NULL!	-250.699	-635.239	34.8766	84.5097	#NULL!	#NULL!	-134.992	6.36558	461.659	-197.505	#NULL!	#NULL!	-440.425	-539.268	-257.529	-647.015	#NULL!	#NULL!	695.811	-630.825	166.91	-594.678	#NULL!	#NULL!	470.905	674.537	-272.826	-416.009	#NULL!	#NULL!	248.796	-345.623
206.679	-314.51	197.836	-557.383	#NULL!	#NULL!	-300.332	-167.925	-117.075	-341.298	#NULL!	#NULL!	595.089	-292.694	551.464	-720.295	#NULL!	#NULL!	-266.716	-635.144	49.6982	90.303	#NULL!	#NULL!	-143.542	6.39103	457.38	-197.496	#NULL!	#NULL!	-468.034	-539.524	-309.414	-646.912	#NULL!	#NULL!	690.878	-630.815	122.596	-594.678	#NULL!	#NULL!	499.965	679.116	-281.438	-413.689	#NULL!	#NULL!	244.471	-343.275
187.627	-314.434	192.917	-557.364	#NULL!	#NULL!	-305.248	-167.906	-118.895	-336.62	#NULL!	#NULL!	544.164	-292	519.016	-720.51	#NULL!	#NULL!	-271.028	-635.118	43.5524	92.686	#NULL!	#NULL!	-240.253	7.69348	478.785	-195.507	#NULL!	#NULL!	-485.667	-539.471	-322.252	-646.887	#NULL!	#NULL!	685.945	-630.806	161.375	-592.357	#NULL!	#NULL!	472.956	679.168	-286.362	-413.689	#NULL!	#NULL!	248.822	-340.987
387.367	-312.902	187.998	-557.344	#NULL!	#NULL!	-310.165	-167.886	-123.199	-336.603	#NULL!	#NULL!	452.166	-291.845	514.088	-720.484	#NULL!	#NULL!	-275.957	-635.089	47.8793	95.0121	#NULL!	#NULL!	-243.998	6.69001	474.505	-195.499	#NULL!	#NULL!	-392.684	-537.719	-341.508	-646.848	#NULL!	#NULL!	671.146	-630.777	157.067	-592.357	#NULL!	#NULL!	486.655	683.777	-290.67	-413.689	#NULL!	#NULL!	240.147	-340.926
261.998	-312.4	183.079	-557.324	#NULL!	#NULL!	-315.081	-167.867	-118.256	-331.953	#NULL!	#NULL!	447.238	-291.816	509.16	-720.457	#NULL!	#NULL!	-161.976	-633.417	42.3423	96.217	#NULL!	#NULL!	-27.0474	8.07356	470.226	-195.49	#NULL!	#NULL!	-422.607	-537.63	-352.741	-646.826	#NULL!	#NULL!	666.212	-630.767	152.143	-592.357	#NULL!	#NULL!	491.248	688.404	-342.986	-413.689	#NULL!	#NULL!	243.878	-338.635
257.696	-312.383	178.16	-557.304	#NULL!	#NULL!	-319.998	-167.847	-121.945	-331.938	#NULL!	#NULL!	612.344	-291.622	504.231	-720.43	#NULL!	#NULL!	-242.062	-632.942	50.9815	98.5195	#NULL!	#NULL!	-38.8028	8.10855	465.947	-195.482	#NULL!	#NULL!	-427.95	-537.614	-385.37	-646.761	#NULL!	#NULL!	661.279	-630.758	146.603	-592.357	#NULL!	#NULL!	468.849	691.152	-347.91	-413.689	#NULL!	#NULL!	248.85	-335.966
382.462	-310.162	239.66	-555.216	#NULL!	#NULL!	-323.685	-167.832	-119.461	-327.278	#NULL!	#NULL!	607.422	-290.419	499.303	-720.403	#NULL!	#NULL!	-246.996	-634.087	46.0605	99.7211	#NULL!	#NULL!	-83.1488	9.25515	429.574	-195.41	#NULL!	#NULL!	-472.833	-537.142	-225.961	-645.047	#NULL!	#NULL!	656.346	-630.748	141.68	-592.357	#NULL!	#NULL!	499.993	693.022	-352.833	-413.689	#NULL!	#NULL!	239.762	-335.902
207.927	-309.852	234.741	-555.196	#NULL!	#NULL!	-339.049	-167.77	-124.38	-327.258	#NULL!	#NULL!	432.459	-290.554	494.375	-720.376	#NULL!	#NULL!	-158.268	-631.091	49.786	104.4	#NULL!	#NULL!	-110.404	8.32165	425.295	-195.401	#NULL!	#NULL!	-476.045	-538.485	-230.24	-645.038	#NULL!	#NULL!	642.78	-630.722	136.756	-592.357	#NULL!	#NULL!	472.62	695.78	-356.526	-413.689	#NULL!	#NULL!	253.832	-331.751
187.032	-309.769	229.822	-555.176	#NULL!	#NULL!	-295.396	-163.282	-96.0709	-322.701	#NULL!	#NULL!	406.591	-289.226	490.678	-720.356	#NULL!	#NULL!	-202.21	-630.438	46.0825	103.245	#NULL!	#NULL!	-139.254	9.42213	421.015	-195.393	#NULL!	#NULL!	-431.859	-535.235	-234.519	-645.03	#NULL!	#NULL!	681.017	-628.478	131.832	-592.357	#NULL!	#NULL!	497.949	698.048	-266.662	-411.368	#NULL!	#NULL!	246.389	-332.858
259.555	-308.893	224.903	-555.157	#NULL!	#NULL!	-300.312	-163.263	-115.753	-323.79	#NULL!	#NULL!	399.814	-289.186	478.358	-720.289	#NULL!	#NULL!	-213.712	-630.761	54.1423	111.425	#NULL!	#NULL!	-146.735	9.4444	417.271	-195.385	#NULL!	#NULL!	-435.427	-536.577	-368.779	-644.763	#NULL!	#NULL!	676.083	-628.469	126.908	-592.357	#NULL!	#NULL!	472.466	700.416	-270.357	-412.529	#NULL!	#NULL!	241.432	-332.823
254.643	-307.708	219.984	-555.137	#NULL!	#NULL!	-305.229	-163.243	-126.821	-323.746	#NULL!	#NULL!	390.568	-290.305	473.429	-720.262	#NULL!	#NULL!	-266.69	-630.056	48.5979	111.455	#NULL!	#NULL!	-162.769	8.4775	456.327	-193.431	#NULL!	#NULL!	-479.237	-535.094	-237.725	-644.008	#NULL!	#NULL!	651.418	-628.421	118.292	-592.357	#NULL!	#NULL!	511.993	702.27	-280.814	-409.048	#NULL!	#NULL!	237.101	-331.634
383.709	-305.893	174.483	-554.955	#NULL!	#NULL!	-310.145	-163.223	-99.1206	-318.019	#NULL!	#NULL!	385.639	-290.276	575.707	-718.47	#NULL!	#NULL!	-272.852	-630.41	53.5555	116.127	#NULL!	#NULL!	-167.044	8.49022	474.522	-191.436	#NULL!	#NULL!	-482.449	-536.437	-251.628	-642.964	#NULL!	#NULL!	646.485	-628.411	169.996	-590.037	#NULL!	#NULL!	475.969	704.658	-289.431	-409.048	#NULL!	#NULL!	253.851	-328.274
378.793	-305.873	147.429	-554.846	#NULL!	#NULL!	-315.061	-163.203	-114.493	-317.957	#NULL!	#NULL!	590.179	-289.142	572.011	-718.449	#NULL!	#NULL!	-277.164	-630.385	49.8592	116.148	#NULL!	#NULL!	-171.319	8.50294	470.243	-191.428	#NULL!	#NULL!	-373.965	-533.716	-254.841	-643.974	#NULL!	#NULL!	636.002	-628.391	165.072	-590.037	#NULL!	#NULL!	512.355	706.905	-342.976	-408.661	#NULL!	#NULL!	235.887	-326.989
206.718	-305.184	244.591	-552.901	#NULL!	#NULL!	-319.978	-163.184	-120.629	-315.598	#NULL!	#NULL!	586.489	-287.946	563.386	-718.402	#NULL!	#NULL!	-161.958	-629.895	51.1133	119.665	#NULL!	#NULL!	-175.594	8.51566	465.964	-191.419	#NULL!	#NULL!	-420.452	-533.578	-307.792	-642.853	#NULL!	#NULL!	727.886	-626.251	121.989	-590.037	#NULL!	#NULL!	476.595	709.293	-349.132	-409.048	#NULL!	#NULL!	239.038	-317.74
188.281	-305.11	215.077	-552.782	#NULL!	#NULL!	-331.858	-162.748	-99.717	-314.514	#NULL!	#NULL!	544.597	-287.697	558.458	-718.376	#NULL!	#NULL!	-181.671	-629.778	47.417	119.685	#NULL!	#NULL!	-237.038	9.71316	461.685	-191.411	#NULL!	#NULL!	-466.932	-531.41	-317.954	-642.494	#NULL!	#NULL!	722.953	-626.242	160.15	-588.876	#NULL!	#NULL!	512.365	711.541	-352.827	-410.208	#NULL!	#NULL!	234.7	-317.71
252.819	-303.037	211.388	-552.768	#NULL!	#NULL!	-337.19	-164.281	-115.698	-313.283	#NULL!	#NULL!	539.669	-287.668	467.283	-717.879	#NULL!	#NULL!	-240.805	-628.252	62.2387	125.478	#NULL!	#NULL!	-23.8329	10.0932	425.312	-191.339	#NULL!	#NULL!	-477.082	-531.042	-322.239	-643.84	#NULL!	#NULL!	710.62	-626.218	141.688	-587.716	#NULL!	#NULL!	481.291	714.151	-264.807	-406.728	#NULL!	#NULL!	229.123	-317.671
185.218	-302.767	197.861	-552.713	#NULL!	#NULL!	-295.376	-158.619	-115.673	-308.613	#NULL!	#NULL!	438.021	-287.065	605.292	-716.281	#NULL!	#NULL!	-147.154	-626.46	50.5338	125.542	#NULL!	#NULL!	-48.4125	10.1664	421.033	-191.33	#NULL!	#NULL!	-480.294	-532.385	-341.491	-642.786	#NULL!	#NULL!	705.687	-626.208	136.764	-587.716	#NULL!	#NULL!	506.213	718.506	-277.117	-406.728	#NULL!	#NULL!	244.008	-315.457
380.041	-301.215	192.942	-552.693	#NULL!	#NULL!	-300.293	-158.6	-114.425	-305.115	#NULL!	#NULL!	602.518	-285.693	600.364	-716.254	#NULL!	#NULL!	-213.687	-626.065	53.6433	130.225	#NULL!	#NULL!	-63.374	10.2109	416.753	-191.322	#NULL!	#NULL!	-377.688	-529.646	-350.049	-642.769	#NULL!	#NULL!	700.754	-626.199	131.841	-587.716	#NULL!	#NULL!	474.476	718.182	-318.35	-404.407	#NULL!	#NULL!	237.825	-313.096
375.125	-301.195	188.023	-552.674	#NULL!	#NULL!	-305.209	-158.58	-114.394	-299.278	#NULL!	#NULL!	404.145	-285.689	595.435	-716.227	#NULL!	#NULL!	-266.667	-625.75	56.5499	135.299	#NULL!	#NULL!	-95.4343	10.3063	456.346	-189.03	#NULL!	#NULL!	-419.365	-529.184	-384.283	-642.701	#NULL!	#NULL!	695.821	-626.189	126.917	-587.716	#NULL!	#NULL!	504.27	723.532	-340.507	-404.407	#NULL!	#NULL!	234.1	-314.229
206.733	-301.687	183.104	-552.654	#NULL!	#NULL!	-310.125	-158.56	-114.369	-294.608	#NULL!	#NULL!	396.752	-285.645	590.507	-716.201	#NULL!	#NULL!	-271.596	-625.721	51.2011	133.762	#NULL!	#NULL!	-143.525	10.4495	452.065	-189.361	#NULL!	#NULL!	-422.577	-530.528	-223.269	-640.99	#NULL!	#NULL!	690.888	-626.18	168.774	-585.396	#NULL!	#NULL!	471.485	723.209	-345.43	-404.407	#NULL!	#NULL!	229.769	-313.039
372.677	-298.854	178.185	-552.634	#NULL!	#NULL!	-319.958	-158.521	-112.703	-289.555	#NULL!	#NULL!	534.765	-282.942	585.578	-716.174	#NULL!	#NULL!	-275.908	-625.695	57.486	153.699	#NULL!	#NULL!	-156.345	11.5022	411.413	-189.28	#NULL!	#NULL!	-471.732	-529.367	-233.968	-640.968	#NULL!	#NULL!	685.955	-626.17	163.85	-585.396	#NULL!	#NULL!	505.554	727.779	-350.354	-404.407	#NULL!	#NULL!	236.611	-308.452
252.224	-298.372	239.685	-550.546	#NULL!	#NULL!	-324.875	-158.501	-110.637	-286.45	#NULL!	#NULL!	529.837	-282.913	580.65	-716.147	#NULL!	#NULL!	-290.077	-625.611	55.0145	152.538	#NULL!	#NULL!	-250.388	11.7821	470.26	-187.365	#NULL!	#NULL!	-408.67	-527.187	-247.34	-640.942	#NULL!	#NULL!	671.155	-626.141	121.997	-585.396	#NULL!	#NULL!	468.617	727.851	-266.03	-402.087	#NULL!	#NULL!	229.178	-308.013
248.537	-298.357	234.766	-550.526	#NULL!	#NULL!	-329.796	-159.647	-114.326	-286.435	#NULL!	#NULL!	434.349	-282.346	553.547	-715.608	#NULL!	#NULL!	-240.781	-623.556	60.038	167.783	#NULL!	#NULL!	-261.075	11.8139	465.981	-187.357	#NULL!	#NULL!	-414.015	-527.509	-370.902	-640.696	#NULL!	#NULL!	666.222	-626.132	144.159	-583.076	#NULL!	#NULL!	505.502	732.414	-275.877	-402.087	#NULL!	#NULL!	225.451	-309.532
184.624	-298.101	229.847	-550.506	#NULL!	#NULL!	-285.533	-156.327	-89.7187	-284.199	#NULL!	#NULL!	427.573	-282.306	549.841	-717.154	#NULL!	#NULL!	-147.13	-621.763	60.6833	172.479	#NULL!	#NULL!	-136.566	13.4726	461.702	-187.348	#NULL!	#NULL!	-462.106	-527.366	-230.213	-638.606	#NULL!	#NULL!	661.289	-626.122	139.235	-583.076	#NULL!	#NULL!	471.71	732.48	-291.264	-402.087	#NULL!	#NULL!	237.877	-303.825
182.16	-299.257	224.928	-550.487	#NULL!	#NULL!	-290.45	-156.308	-90.3028	-278.359	#NULL!	#NULL!	381.979	-283.209	519.046	-715.811	#NULL!	#NULL!	-214.895	-621.361	61.9447	177.171	#NULL!	#NULL!	-140.31	12.4691	419.975	-188.281	#NULL!	#NULL!	-465.846	-527.355	-250.006	-638.905	#NULL!	#NULL!	656.356	-626.112	134.311	-583.076	#NULL!	#NULL!	517.967	737.026	-315.879	-399.767	#NULL!	#NULL!	234.152	-304.958
376.374	-296.538	220.009	-550.467	#NULL!	#NULL!	-314.417	-156.212	-116.736	-277.086	#NULL!	#NULL!	597.614	-280.967	514.117	-715.784	#NULL!	#NULL!	-266.641	-620.662	63.206	181.863	#NULL!	#NULL!	-169.165	12.555	415.7	-187.257	#NULL!	#NULL!	-477.071	-528.336	-307.245	-639.807	#NULL!	#NULL!	641.557	-626.084	129.387	-583.076	#NULL!	#NULL!	482.819	737.094	-319.574	-400.927	#NULL!	#NULL!	229.202	-303.764
248.557	-293.694	173.278	-550.28	#NULL!	#NULL!	-275.696	-155.201	-89.6694	-274.859	#NULL!	#NULL!	586.519	-282.075	509.189	-715.758	#NULL!	#NULL!	-272.187	-621.021	67.5476	186.539	#NULL!	#NULL!	-175.572	13.5887	452.082	-185.298	#NULL!	#NULL!	-480.277	-528.327	-311.519	-638.783	#NULL!	#NULL!	681.027	-623.456	167.551	-580.755	#NULL!	#NULL!	520.532	741.656	-340.497	-399.38	#NULL!	#NULL!	224.244	-303.729
244.869	-293.679	168.359	-550.26	#NULL!	#NULL!	-280.612	-155.181	-89.6447	-270.189	#NULL!	#NULL!	423.07	-279.539	504.261	-715.731	#NULL!	#NULL!	-275.274	-622.177	62.6193	186.566	#NULL!	#NULL!	-184.126	12.5995	448.873	-185.292	#NULL!	#NULL!	-384.088	-526.584	-315.799	-638.774	#NULL!	#NULL!	674.86	-623.831	163.858	-580.755	#NULL!	#NULL!	482.212	741.731	-346.653	-399.767	#NULL!	#NULL!	234.185	-299.163
182.799	-293.431	164.055	-550.243	#NULL!	#NULL!	-294.132	-155.127	-115.461	-268.529	#NULL!	#NULL!	388.158	-279.723	499.332	-715.704	#NULL!	#NULL!	-291.901	-620.904	63.2646	191.261	#NULL!	#NULL!	-188.401	12.6123	411.965	-185.218	#NULL!	#NULL!	-420.418	-525.461	-341.116	-638.386	#NULL!	#NULL!	651.428	-623.399	149.087	-580.755	#NULL!	#NULL!	514.903	746.303	-350.961	-399.767	#NULL!	#NULL!	229.227	-299.128
372.706	-291.86	147.453	-550.176	#NULL!	#NULL!	-300.278	-155.102	-119.159	-270.071	#NULL!	#NULL!	528.623	-279.383	494.404	-715.677	#NULL!	#NULL!	-200.098	-619.1	66.9755	193.591	#NULL!	#NULL!	-192.676	12.625	395.383	-185.185	#NULL!	#NULL!	-422.56	-526.469	-346.823	-638.713	#NULL!	#NULL!	645.261	-623.773	122.417	-580.369	#NULL!	#NULL!	479.481	746.372	-264.174	-397.059	#NULL!	#NULL!	224.89	-299.098
367.79	-291.84	244.616	-548.231	#NULL!	#NULL!	-305.194	-155.083	-108.073	-266.613	#NULL!	#NULL!	523.701	-278.18	490.092	-715.654	#NULL!	#NULL!	-239.112	-618.477	62.6778	195.964	#NULL!	#NULL!	-195.882	12.6345	464.924	-184.308	#NULL!	#NULL!	-472.784	-525.305	-381.591	-638.644	#NULL!	#NULL!	636.629	-623.37	144.167	-578.435	#NULL!	#NULL!	517.379	750.934	-267.87	-398.606	#NULL!	#NULL!	219.326	-296.741
246.118	-289.021	215.102	-548.112	#NULL!	#NULL!	-310.111	-155.063	-111.135	-264.265	#NULL!	#NULL!	519.388	-278.154	477.157	-715.192	#NULL!	#NULL!	-203.782	-616.73	67.0048	198.29	#NULL!	#NULL!	-281.376	12.889	460.649	-183.284	#NULL!	#NULL!	-405.449	-523.476	-223.787	-636.926	#NULL!	#NULL!	713.097	-621.201	139.244	-578.435	#NULL!	#NULL!	480.998	751.005	-276.484	-397.446	#NULL!	#NULL!	234.204	-295.687
243.655	-290.177	211.413	-548.097	#NULL!	#NULL!	-319.943	-155.024	-109.265	-259.603	#NULL!	#NULL!	433.758	-277.646	472.219	-716.731	#NULL!	#NULL!	-216.109	-617.831	62.7071	200.663	#NULL!	#NULL!	-93.28	14.3584	415.717	-183.195	#NULL!	#NULL!	-408.659	-524.481	-235.91	-636.563	#NULL!	#NULL!	706.93	-621.575	134.32	-578.435	#NULL!	#NULL!	519.856	755.564	-281.408	-397.446	#NULL!	#NULL!	229.254	-294.493
371.497	-287.192	197.885	-548.043	#NULL!	#NULL!	-278.098	-141.979	-110.464	-253.76	#NULL!	#NULL!	381.394	-277.335	463.594	-716.684	#NULL!	#NULL!	-261.277	-615.997	66.418	202.992	#NULL!	#NULL!	-106.104	14.3966	402.881	-182.831	#NULL!	#NULL!	-468.501	-523.288	-319.355	-636.398	#NULL!	#NULL!	701.997	-621.566	129.396	-578.435	#NULL!	#NULL!	483.011	755.636	-285.716	-397.446	#NULL!	#NULL!	224.296	-294.458
366.58	-287.172	192.966	-548.024	#NULL!	#NULL!	-283.021	-143.514	-109.819	-247.925	#NULL!	#NULL!	592.71	-276.241	575.736	-713.77	#NULL!	#NULL!	-265.392	-617.538	63.3524	205.358	#NULL!	#NULL!	-159.538	14.5556	397.531	-183.158	#NULL!	#NULL!	-420.936	-521.401	-371.955	-636.632	#NULL!	#NULL!	697.064	-621.556	163.867	-576.115	#NULL!	#NULL!	519.865	760.2	-291.258	-398.606	#NULL!	#NULL!	219.352	-292.106
364.117	-288.328	188.047	-548.004	#NULL!	#NULL!	-287.933	-142.328	-107.91	-235.869	#NULL!	#NULL!	584.085	-276.19	570.808	-713.744	#NULL!	#NULL!	-291.26	-616.211	67.7086	212.383	#NULL!	#NULL!	-165.95	14.5747	456.38	-180.905	#NULL!	#NULL!	-403.829	-519.423	-228.058	-634.886	#NULL!	#NULL!	692.131	-621.546	159.559	-576.115	#NULL!	#NULL!	483.483	760.271	-315.87	-395.126	#NULL!	#NULL!	229.28	-289.857
243.68	-284.349	183.128	-547.984	#NULL!	#NULL!	-295.305	-141.91	-106.658	-231.593	#NULL!	#NULL!	418.985	-275.209	565.88	-713.717	#NULL!	#NULL!	-167.215	-614.207	68.97	217.076	#NULL!	#NULL!	-211.903	14.7114	451.564	-181.234	#NULL!	#NULL!	-462.07	-518.911	-249.096	-634.506	#NULL!	#NULL!	687.197	-621.537	147.864	-576.115	#NULL!	#NULL!	512.887	765.236	-335.566	-395.126	#NULL!	#NULL!	224.322	-289.822
241.216	-285.504	178.209	-547.964	#NULL!	#NULL!	-300.838	-142.277	-110.353	-232.745	#NULL!	#NULL!	400.504	-275.1	560.951	-713.69	#NULL!	#NULL!	-237.036	-614.184	70.2314	221.768	#NULL!	#NULL!	-220.453	14.7369	440.331	-181.212	#NULL!	#NULL!	-466.881	-519.235	-313.284	-634.378	#NULL!	#NULL!	668.699	-621.115	124.477	-575.728	#NULL!	#NULL!	481.231	764.524	-340.49	-395.126	#NULL!	#NULL!	215.641	-290.921
369.058	-282.519	239.711	-545.487	#NULL!	#NULL!	-310.055	-141.851	-105.403	-226.928	#NULL!	#NULL!	386.95	-275.019	484.562	-713.274	#NULL!	#NULL!	-240.732	-614.162	69.4417	226.863	#NULL!	#NULL!	-230.067	15.7801	411.447	-181.155	#NULL!	#NULL!	-399.537	-515.377	-339.317	-634.665	#NULL!	#NULL!	662.532	-621.489	120.781	-577.275	#NULL!	#NULL!	510.326	769.49	-345.413	-395.126	#NULL!	#NULL!	234.25	-287.574
364.142	-282.499	233.56	-545.851	#NULL!	#NULL!	-314.978	-143.386	-109.093	-226.913	#NULL!	#NULL!	377.096	-274.569	604.089	-711.575	#NULL!	#NULL!	-203.141	-612.037	71.522	231.159	#NULL!	#NULL!	-250.371	15.8406	415.73	-180.148	#NULL!	#NULL!	-457.245	-515.205	-346.806	-634.65	#NULL!	#NULL!	657.599	-621.479	141.715	-573.407	#NULL!	#NULL!	509.719	774.127	-349.106	-395.126	#NULL!	#NULL!	219.998	-287.474
361.679	-283.655	228.642	-545.832	#NULL!	#NULL!	-260.882	-140.105	-105.379	-222.258	#NULL!	#NULL!	522.487	-274.65	599.161	-711.548	#NULL!	#NULL!	-258.789	-611.315	68.4564	233.526	#NULL!	#NULL!	-257.852	15.8628	407.178	-178.776	#NULL!	#NULL!	-465.795	-515.18	-379.97	-634.585	#NULL!	#NULL!	681.036	-619.207	135.559	-573.794	#NULL!	#NULL!	511.887	778.758	-261.704	-392.805	#NULL!	#NULL!	228.066	-285.213
237.544	-281.992	223.722	-545.812	#NULL!	#NULL!	-265.799	-140.085	-109.068	-222.243	#NULL!	#NULL!	516.334	-273.048	594.232	-711.522	#NULL!	#NULL!	-262.904	-612.856	74.6315	235.842	#NULL!	#NULL!	-262.127	15.8756	401.827	-179.104	#NULL!	#NULL!	-373.88	-513.424	-223.77	-632.864	#NULL!	#NULL!	676.103	-619.197	130.635	-573.794	#NULL!	#NULL!	489.488	781.506	-265.397	-392.805	#NULL!	#NULL!	223.729	-285.183
200.056	-281.842	218.804	-545.792	#NULL!	#NULL!	-270.715	-140.066	-79.5478	-221.194	#NULL!	#NULL!	430.086	-272.927	589.304	-711.495	#NULL!	#NULL!	-291.852	-611.51	68.4857	238.225	#NULL!	#NULL!	-269.608	15.8978	397.548	-179.096	#NULL!	#NULL!	-377.078	-511.385	-234.467	-632.504	#NULL!	#NULL!	651.437	-619.149	163.875	-571.474	#NULL!	#NULL!	527.313	783.364	-276.476	-392.805	#NULL!	#NULL!	236.755	-282.956
233.866	-279.646	173.303	-545.61	#NULL!	#NULL!	-275.007	-137.717	-104.739	-217.59	#NULL!	#NULL!	590.886	-271.533	584.376	-711.468	#NULL!	#NULL!	-142.147	-611.225	75.8929	240.534	#NULL!	#NULL!	-190.521	16.6771	393.804	-179.089	#NULL!	#NULL!	-455.624	-510.813	-239.282	-632.833	#NULL!	#NULL!	646.504	-619.14	158.952	-571.474	#NULL!	#NULL!	492.169	785.75	-281.399	-392.805	#NULL!	#NULL!	232.417	-282.926
179.378	-279.039	168.384	-545.59	#NULL!	#NULL!	-290.369	-137.267	-109.049	-218.74	#NULL!	#NULL!	581.645	-271.478	579.447	-711.441	#NULL!	#NULL!	-166.782	-609.904	68.515	242.924	#NULL!	#NULL!	-208.689	16.7311	453.182	-178.191	#NULL!	#NULL!	-458.836	-512.157	-320.052	-632.672	#NULL!	#NULL!	641.571	-619.13	155.259	-571.474	#NULL!	#NULL!	527.322	787.999	-315.451	-390.098	#NULL!	#NULL!	226.853	-280.569
366.62	-277.846	163.465	-545.57	#NULL!	#NULL!	-296.517	-137.631	-80.1196	-213.019	#NULL!	#NULL!	422.706	-270.535	556.04	-710.922	#NULL!	#NULL!	-169.253	-611.064	75.3208	247.586	#NULL!	#NULL!	-227.386	17.8014	438.209	-177.145	#NULL!	#NULL!	-462.033	-510.118	-371.938	-632.569	#NULL!	#NULL!	636.638	-619.121	124.485	-571.474	#NULL!	#NULL!	492.179	790.385	-335.557	-390.098	#NULL!	#NULL!	222.516	-280.538
361.703	-277.827	147.478	-545.506	#NULL!	#NULL!	-300.818	-137.614	-105.329	-212.918	#NULL!	#NULL!	418.393	-270.509	550.493	-711.283	#NULL!	#NULL!	-237.012	-609.487	72.9151	256.997	#NULL!	#NULL!	-285.629	17.9747	436.065	-178.157	#NULL!	#NULL!	-363.702	-507.366	-228.041	-630.824	#NULL!	#NULL!	631.705	-619.111	120.79	-572.634	#NULL!	#NULL!	527.33	791.476	-341.712	-390.485	#NULL!	#NULL!	231.817	-279.445
359.24	-278.982	212.669	-543.043	#NULL!	#NULL!	-305.125	-138.762	-80.7098	-208.346	#NULL!	#NULL!	396.832	-270.381	519.075	-711.112	#NULL!	#NULL!	-240.708	-609.465	80.4028	272.229	#NULL!	#NULL!	-181.963	18.6808	432.868	-175.104	#NULL!	#NULL!	-374.389	-507.335	-245.158	-630.79	#NULL!	#NULL!	710.639	-616.947	144.185	-569.153	#NULL!	#NULL!	#NULL!	#NULL!	-346.636	-390.485	#NULL!	#NULL!	217.571	-278.186
202.534	-277.189	197.91	-543.373	#NULL!	#NULL!	-308.812	-138.748	-105.311	-209.415	#NULL!	#NULL!	384.511	-270.308	514.147	-711.086	#NULL!	#NULL!	-256.711	-606.631	74.257	274.612	#NULL!	#NULL!	-234.329	18.8367	407.193	-175.053	#NULL!	#NULL!	-453.471	-507.099	-248.372	-631.799	#NULL!	#NULL!	705.706	-616.937	139.261	-569.153	#NULL!	#NULL!	#NULL!	#NULL!	-349.1	-391.645	#NULL!	#NULL!	220.683	-275.89
233.478	-274.593	192.991	-543.354	#NULL!	#NULL!	-259.634	-135.447	-100.988	-205.93	#NULL!	#NULL!	370.958	-270.227	509.218	-711.059	#NULL!	#NULL!	-261.647	-608.167	82.9475	285.138	#NULL!	#NULL!	-250.359	18.8844	403.449	-175.045	#NULL!	#NULL!	-457.746	-507.087	-310.416	-630.66	#NULL!	#NULL!	700.773	-616.928	134.337	-569.153	#NULL!	#NULL!	#NULL!	#NULL!	-259.233	-387.778	#NULL!	#NULL!	216.978	-273.546
177.347	-274.757	188.687	-543.336	#NULL!	#NULL!	-262.097	-136.603	-80.6913	-204.844	#NULL!	#NULL!	517.583	-269.924	504.29	-711.032	#NULL!	#NULL!	-169.222	-605.193	82.9768	289.837	#NULL!	#NULL!	-257.839	18.9066	392.217	-174.684	#NULL!	#NULL!	-366.904	-506.342	-339.3	-630.603	#NULL!	#NULL!	695.84	-616.918	129.413	-569.153	#NULL!	#NULL!	#NULL!	#NULL!	-262.929	-389.325	#NULL!	#NULL!	215.778	-266.584
364.181	-273.173	183.153	-543.314	#NULL!	#NULL!	-270.695	-135.403	-99.7339	-201.265	#NULL!	#NULL!	511.428	-268.713	499.361	-711.005	#NULL!	#NULL!	-172.918	-605.171	82.9987	293.361	#NULL!	#NULL!	-262.11	19.934	437.157	-172.742	#NULL!	#NULL!	-412.853	-505.191	-346.789	-630.588	#NULL!	#NULL!	690.907	-616.908	163.884	-566.833	#NULL!	#NULL!	#NULL!	#NULL!	-276.467	-388.165	#NULL!	#NULL!	213.325	-261.931
359.265	-273.154	178.234	-543.294	#NULL!	#NULL!	-275.6	-132.663	-100.324	-196.593	#NULL!	#NULL!	506.5	-268.684	494.433	-710.978	#NULL!	#NULL!	-236.987	-604.791	82.6564	304.327	#NULL!	#NULL!	-269.056	19.9547	428.599	-172.725	#NULL!	#NULL!	-364.22	-503.307	-378.348	-630.525	#NULL!	#NULL!	685.974	-616.899	158.96	-566.833	#NULL!	#NULL!	#NULL!	#NULL!	-328.166	-387.778	#NULL!	#NULL!	210.84	-263.072
356.802	-274.31	239.734	-541.206	#NULL!	#NULL!	-281.748	-133.027	-99.8875	-191.535	#NULL!	#NULL!	428.262	-268.219	489.505	-710.951	#NULL!	#NULL!	-241.3	-604.765	79.3976	308.653	#NULL!	#NULL!	-272.801	18.9512	422.902	-170.683	#NULL!	#NULL!	-370.097	-503.289	-223.219	-628.802	#NULL!	#NULL!	671.174	-616.87	154.652	-566.833	#NULL!	#NULL!	#NULL!	#NULL!	-284.464	-385.844	#NULL!	#NULL!	206.509	-261.883
201.939	-272.524	234.815	-541.186	#NULL!	#NULL!	-286.664	-133.007	-97.4034	-186.875	#NULL!	#NULL!	590.91	-266.837	479.648	-710.898	#NULL!	#NULL!	-251.76	-602.355	74.4693	308.68	#NULL!	#NULL!	-276.537	19.9769	406.14	-170.988	#NULL!	#NULL!	-373.308	-504.294	-232.316	-629.8	#NULL!	#NULL!	666.241	-616.86	126.34	-566.833	#NULL!	#NULL!	#NULL!	#NULL!	-310.519	-385.457	#NULL!	#NULL!	202.184	-259.535
235.135	-270.325	229.896	-541.167	#NULL!	#NULL!	-290.966	-132.99	-101.511	-188.415	#NULL!	#NULL!	580.438	-266.774	474.712	-712.046	#NULL!	#NULL!	-256.688	-602.325	79.4269	313.352	#NULL!	#NULL!	-285.612	22.0332	403.996	-171.999	#NULL!	#NULL!	-453.454	-503.041	-236.595	-629.791	#NULL!	#NULL!	661.308	-616.851	146.655	-564.513	#NULL!	#NULL!	#NULL!	#NULL!	-314.625	-387.004	#NULL!	#NULL!	212.112	-257.287
230.219	-270.305	224.977	-541.147	#NULL!	#NULL!	-258.385	-130.789	-95.3312	-182.602	#NULL!	#NULL!	422.73	-265.838	462.812	-710.414	#NULL!	#NULL!	-260.391	-603.477	75.7306	313.372	#NULL!	#NULL!	-262.097	22.9778	391.163	-170.958	#NULL!	#NULL!	-457.195	-503.03	-239.8	-628.769	#NULL!	#NULL!	656.375	-616.841	141.729	-565.673	#NULL!	#NULL!	#NULL!	#NULL!	-335.549	-385.844	#NULL!	#NULL!	207.154	-257.252
176.138	-270.089	220.058	-541.127	#NULL!	#NULL!	-263.301	-130.769	-99.0204	-182.588	#NULL!	#NULL!	417.802	-265.809	573.302	-709.058	#NULL!	#NULL!	-170.43	-600.489	81.9203	318.037	#NULL!	#NULL!	-268.509	22.9969	386.884	-170.95	#NULL!	#NULL!	-367.943	-499.237	-317.896	-628.614	#NULL!	#NULL!	628.01	-616.786	136.807	-564.513	#NULL!	#NULL!	#NULL!	#NULL!	-339.857	-385.844	#NULL!	#NULL!	202.21	-254.899
362.972	-268.505	173.327	-540.94	#NULL!	#NULL!	-268.218	-130.75	-95.3065	-177.933	#NULL!	#NULL!	413.489	-265.783	568.373	-709.031	#NULL!	#NULL!	-174.126	-600.467	78.2241	318.058	#NULL!	#NULL!	-274.921	23.016	437.173	-169.018	#NULL!	#NULL!	-371.149	-499.227	-321.105	-628.608	#NULL!	#NULL!	734.074	-615.833	131.884	-564.513	#NULL!	#NULL!	#NULL!	#NULL!	-344.167	-387.004	#NULL!	#NULL!	212.131	-253.81
358.055	-268.486	168.408	-540.92	#NULL!	#NULL!	-273.123	-128.01	-95.2819	-173.263	#NULL!	#NULL!	394.386	-266.844	563.445	-709.004	#NULL!	#NULL!	-236.963	-600.094	82.5657	322.733	#NULL!	#NULL!	-279.196	23.0287	432.894	-169.01	#NULL!	#NULL!	-451.298	-498.651	-343.57	-628.225	#NULL!	#NULL!	729.141	-615.824	118.343	-564.513	#NULL!	#NULL!	#NULL!	#NULL!	-256.763	-383.524	#NULL!	#NULL!	205.941	-252.608
354.368	-268.471	164.713	-542.073	#NULL!	#NULL!	-279.27	-128.374	-92.7977	-168.602	#NULL!	#NULL!	380.833	-266.763	484.591	-708.575	#NULL!	#NULL!	-241.891	-600.065	87.5087	325.056	#NULL!	#NULL!	-283.992	26.0868	428.615	-169.001	#NULL!	#NULL!	-456.109	-498.974	-370.316	-628.51	#NULL!	#NULL!	681.045	-614.571	165.124	-562.192	#NULL!	#NULL!	#NULL!	#NULL!	-261.072	-383.524	#NULL!	#NULL!	198.094	-252.166
227.156	-267.962	147.496	-542.004	#NULL!	#NULL!	-284.186	-128.354	-96.4931	-169.755	#NULL!	#NULL!	377.137	-266.741	602.886	-706.87	#NULL!	#NULL!	-246.82	-600.035	83.827	327.425	#NULL!	#NULL!	-295.214	26.1202	424.345	-166.623	#NULL!	#NULL!	-459.854	-499.978	-228.028	-627.777	#NULL!	#NULL!	676.112	-614.562	155.276	-562.192	#NULL!	#NULL!	#NULL!	#NULL!	-273.996	-383.137	#NULL!	#NULL!	217.102	-251.527
199.501	-267.851	215.153	-538.383	#NULL!	#NULL!	-287.878	-129.505	-90.3136	-163.942	#NULL!	#NULL!	367.28	-266.683	597.958	-706.843	#NULL!	#NULL!	-286.863	-599.798	84.4724	332.121	#NULL!	#NULL!	-312.317	25.1565	420.065	-166.953	#NULL!	#NULL!	-365.787	-494.847	-244.606	-626.728	#NULL!	#NULL!	651.447	-614.514	150.352	-562.192	#NULL!	#NULL!	#NULL!	#NULL!	-280.151	-383.524	#NULL!	#NULL!	204.728	-247.964
232.696	-265.652	209.002	-538.748	#NULL!	#NULL!	-260.822	-125.728	-90.2889	-159.272	#NULL!	#NULL!	585.378	-264.455	593.646	-706.819	#NULL!	#NULL!	-251.736	-597.658	85.7337	336.813	#NULL!	#NULL!	-322.465	26.2013	395.104	-166.565	#NULL!	#NULL!	-370.068	-496.187	-309.329	-626.6	#NULL!	#NULL!	646.514	-614.504	126.965	-561.806	#NULL!	#NULL!	#NULL!	#NULL!	-325.697	-383.524	#NULL!	#NULL!	199.771	-247.929
175.543	-265.423	206.537	-539.905	#NULL!	#NULL!	-266.969	-126.092	-87.8109	-155.78	#NULL!	#NULL!	507.757	-263.994	588.101	-706.789	#NULL!	#NULL!	-256.048	-597.632	80.8127	338.015	#NULL!	#NULL!	-301.621	27.1539	433.981	-164.95	#NULL!	#NULL!	-447.008	-494.943	-313.608	-626.591	#NULL!	#NULL!	641.581	-614.495	120.809	-562.192	#NULL!	#NULL!	#NULL!	#NULL!	-330.62	-383.524	#NULL!	#NULL!	196.053	-247.903
359.304	-263.828	197.935	-538.703	#NULL!	#NULL!	-273.104	-123.736	-91.5002	-155.765	#NULL!	#NULL!	502.828	-263.965	583.173	-706.762	#NULL!	#NULL!	-167.939	-595.415	84.5309	341.519	#NULL!	#NULL!	-309.098	28.1908	429.701	-164.941	#NULL!	#NULL!	-451.283	-494.93	-337.142	-626.206	#NULL!	#NULL!	636.647	-614.485	145.433	-559.872	#NULL!	#NULL!	#NULL!	#NULL!	-285.073	-382.364	#NULL!	#NULL!	204.748	-244.487
354.388	-263.808	193.016	-538.684	#NULL!	#NULL!	-278.021	-123.716	-80.3523	-140.632	#NULL!	#NULL!	407.957	-263.402	578.245	-706.735	#NULL!	#NULL!	-172.876	-596.952	86.4669	355.606	#NULL!	#NULL!	-326.201	27.2271	424.361	-162.899	#NULL!	#NULL!	-454.489	-494.921	-378.331	-626.463	#NULL!	#NULL!	631.712	-615.634	134.354	-559.872	#NULL!	#NULL!	#NULL!	#NULL!	-308.461	-382.364	#NULL!	#NULL!	199.797	-243.293
229.633	-263.308	188.712	-538.666	#NULL!	#NULL!	-282.937	-123.696	-84.6564	-140.615	#NULL!	#NULL!	373.452	-264.371	558.531	-706.628	#NULL!	#NULL!	-238.171	-595.39	82.7853	357.976	#NULL!	#NULL!	-298.407	29.1736	420.082	-162.891	#NULL!	#NULL!	-442.724	-492.588	-221.062	-624.744	#NULL!	#NULL!	710.649	-612.311	154.054	-557.165	#NULL!	#NULL!	#NULL!	#NULL!	-335.129	-380.817	#NULL!	#NULL!	195.459	-243.263
195.833	-263.173	183.178	-538.644	#NULL!	#NULL!	-258.344	-121.075	-80.3276	-135.962	#NULL!	#NULL!	576.76	-263.23	553.603	-706.601	#NULL!	#NULL!	-243.099	-595.361	87.1122	360.302	#NULL!	#NULL!	-313.368	29.2181	416.337	-162.883	#NULL!	#NULL!	-365.776	-492.141	-316.813	-625.569	#NULL!	#NULL!	705.716	-612.302	147.899	-557.552	#NULL!	#NULL!	#NULL!	#NULL!	-339.235	-382.364	#NULL!	#NULL!	191.121	-243.232
236.403	-261.004	178.259	-538.624	#NULL!	#NULL!	-264.491	-121.439	-84.0169	-135.947	#NULL!	#NULL!	417.21	-261.108	548.674	-706.574	#NULL!	#NULL!	-248.027	-595.331	83.4232	361.497	#NULL!	#NULL!	-322.982	30.2614	396.546	-162.844	#NULL!	#NULL!	-449.127	-490.54	-343.558	-625.516	#NULL!	#NULL!	700.783	-612.292	129.435	-557.552	#NULL!	#NULL!	#NULL!	#NULL!	-257.986	-378.883	#NULL!	#NULL!	199.823	-238.658
191.748	-260.437	237.299	-536.526	#NULL!	#NULL!	-269.407	-121.419	-80.303	-131.292	#NULL!	#NULL!	390.72	-260.951	519.104	-706.413	#NULL!	#NULL!	-283.345	-594.73	89.6056	364.987	#NULL!	#NULL!	-332.066	30.2884	392.802	-162.837	#NULL!	#NULL!	-452.339	-491.883	-346.768	-625.51	#NULL!	#NULL!	695.85	-612.282	124.511	-557.552	#NULL!	#NULL!	#NULL!	#NULL!	-260.45	-380.043	#NULL!	#NULL!	194.865	-238.623
172.49	-260.748	232.38	-536.506	#NULL!	#NULL!	-275.541	-118.674	-75.3716	-128.977	#NULL!	#NULL!	369.774	-260.827	514.176	-706.386	#NULL!	#NULL!	-287.46	-596.271	90.867	369.68	#NULL!	#NULL!	-340.085	29.2976	431.858	-160.883	#NULL!	#NULL!	-402.103	-490.004	-366.02	-624.456	#NULL!	#NULL!	690.917	-612.273	119.587	-557.552	#NULL!	#NULL!	#NULL!	#NULL!	-272.142	-378.883	#NULL!	#NULL!	199.849	-234.022
354.407	-259.145	227.461	-536.487	#NULL!	#NULL!	-281.074	-119.041	-80.2783	-126.622	#NULL!	#NULL!	362.382	-260.783	509.248	-706.36	#NULL!	#NULL!	-208.588	-593.217	88.3955	368.518	#NULL!	#NULL!	-352.905	30.3504	427.579	-160.874	#NULL!	#NULL!	-405.309	-489.994	-370.834	-624.446	#NULL!	#NULL!	685.983	-612.263	134.363	-555.231	#NULL!	#NULL!	#NULL!	#NULL!	-277.681	-378.883	#NULL!	#NULL!	196.124	-235.155
351.944	-260.301	222.542	-536.467	#NULL!	#NULL!	-284.152	-120.194	-76.5767	-124.302	#NULL!	#NULL!	581.706	-259.737	504.319	-706.333	#NULL!	#NULL!	-253.763	-592.558	89.0482	374.389	#NULL!	#NULL!	-343.279	32.351	422.238	-158.832	#NULL!	#NULL!	-440.569	-488.536	-228.006	-622.36	#NULL!	#NULL!	671.184	-612.234	156.522	-554.071	#NULL!	#NULL!	#NULL!	#NULL!	-281.989	-378.883	#NULL!	#NULL!	198.636	-229.378
238.267	-256.349	173.352	-536.27	#NULL!	#NULL!	-253.408	-116.431	-81.4834	-121.947	#NULL!	#NULL!	571.85	-259.678	499.391	-706.306	#NULL!	#NULL!	-164.837	-591.129	88.4614	379.091	#NULL!	#NULL!	-328.313	33.3211	417.959	-158.824	#NULL!	#NULL!	-355.068	-487.1	-241.915	-622.671	#NULL!	#NULL!	666.251	-612.225	151.598	-554.071	#NULL!	#NULL!	#NULL!	#NULL!	-323.226	-378.883	#NULL!	#NULL!	196.15	-230.519
190.946	-256.159	168.433	-536.25	#NULL!	#NULL!	-259.555	-116.795	-61.1802	-119.694	#NULL!	#NULL!	505.317	-259.283	494.462	-706.279	#NULL!	#NULL!	-213.504	-590.84	97.1153	383.743	#NULL!	#NULL!	-349.682	34.3993	413.68	-158.815	#NULL!	#NULL!	-358.274	-487.09	-307.707	-622.54	#NULL!	#NULL!	661.318	-612.215	146.676	-552.911	#NULL!	#NULL!	#NULL!	#NULL!	-328.15	-378.883	#NULL!	#NULL!	202.406	-220.133
187.259	-256.144	217.637	-533.723	#NULL!	#NULL!	-264.471	-116.776	-67.329	-119.669	#NULL!	#NULL!	502.846	-260.443	489.534	-706.252	#NULL!	#NULL!	-241.842	-590.671	88.4907	383.79	#NULL!	#NULL!	-357.163	34.4216	409.401	-158.807	#NULL!	#NULL!	-448.043	-486.823	-313.591	-622.529	#NULL!	#NULL!	656.385	-612.206	129.443	-552.911	#NULL!	#NULL!	#NULL!	#NULL!	-331.839	-376.563	#NULL!	#NULL!	198.688	-220.107
171.276	-257.246	211.487	-534.088	#NULL!	#NULL!	-269.388	-116.756	-72.8628	-119.647	#NULL!	#NULL!	404.285	-258.683	479.677	-706.199	#NULL!	#NULL!	-246.771	-590.642	97.1446	388.442	#NULL!	#NULL!	-365.712	34.447	396.559	-159.797	#NULL!	#NULL!	-451.783	-486.812	-332.846	-622.152	#NULL!	#NULL!	681.055	-609.936	124.519	-552.911	#NULL!	#NULL!	#NULL!	#NULL!	-257.979	-375.403	#NULL!	#NULL!	199.953	-215.48
166.979	-256.063	207.183	-534.07	#NULL!	#NULL!	-246.025	-114.518	-77.7818	-119.627	#NULL!	#NULL!	566.317	-257.297	465.508	-706.121	#NULL!	#NULL!	-281.269	-590.437	89.752	388.482	#NULL!	#NULL!	-373.197	33.4547	391.214	-158.771	#NULL!	#NULL!	-363.613	-486.06	-337.662	-622.481	#NULL!	#NULL!	676.122	-609.926	120.826	-552.911	#NULL!	#NULL!	#NULL!	#NULL!	-271.518	-374.242	#NULL!	#NULL!	196.235	-215.454
347.062	-252.121	196.73	-534.028	#NULL!	#NULL!	-274.909	-114.402	-72.4262	-114.589	#NULL!	#NULL!	413.538	-256.39	459.964	-706.091	#NULL!	#NULL!	-251.687	-588.264	97.1739	393.141	#NULL!	#NULL!	-378.541	33.4706	389.07	-159.782	#NULL!	#NULL!	-434.146	-485.85	-375.644	-623.421	#NULL!	#NULL!	651.456	-609.878	134.371	-550.591	#NULL!	#NULL!	#NULL!	#NULL!	-276.441	-374.242	#NULL!	#NULL!	196.261	-210.818
237.672	-251.683	191.811	-534.009	#NULL!	#NULL!	-242.328	-112.201	-76.5336	-116.129	#NULL!	#NULL!	388.274	-257.414	573.331	-704.359	#NULL!	#NULL!	-261.544	-588.206	92.2382	391.993	#NULL!	#NULL!	-337.923	35.3789	431.875	-156.82	#NULL!	#NULL!	-439.485	-484.819	-378.853	-623.415	#NULL!	#NULL!	646.523	-609.869	146.685	-548.27	#NULL!	#NULL!	#NULL!	#NULL!	-280.75	-374.242	#NULL!	#NULL!	193.776	-211.96
233.984	-251.668	186.892	-533.989	#NULL!	#NULL!	-250.93	-111.778	-70.354	-110.317	#NULL!	#NULL!	367.335	-256.115	568.402	-704.332	#NULL!	#NULL!	-265.246	-589.358	87.9332	393.191	#NULL!	#NULL!	-342.197	35.3916	426.522	-157.825	#NULL!	#NULL!	-355.051	-483.041	-219.439	-620.346	#NULL!	#NULL!	641.59	-609.859	129.452	-548.27	#NULL!	#NULL!	#NULL!	#NULL!	-303.522	-374.242	#NULL!	#NULL!	195.048	-206.174
190.966	-251.496	181.973	-533.969	#NULL!	#NULL!	-257.077	-112.142	-70.3294	-105.647	#NULL!	#NULL!	362.406	-256.086	563.474	-704.305	#NULL!	#NULL!	-161.732	-586.45	87.3464	397.894	#NULL!	#NULL!	-347.532	37.4368	406.735	-156.77	#NULL!	#NULL!	-433.59	-480.778	-362.259	-620.401	#NULL!	#NULL!	637.89	-609.852	124.528	-548.27	#NULL!	#NULL!	#NULL!	#NULL!	-325.68	-374.242	#NULL!	#NULL!	190.091	-206.139
187.279	-251.481	177.054	-533.949	#NULL!	#NULL!	-261.993	-112.122	-56.1749	-103.368	#NULL!	#NULL!	578.028	-256.192	544.993	-704.205	#NULL!	#NULL!	-256.603	-585.887	87.9917	402.589	#NULL!	#NULL!	-355.009	38.4736	385.874	-156.729	#NULL!	#NULL!	-438.399	-480.764	-370.282	-620.385	#NULL!	#NULL!	710.659	-607.676	120.835	-548.27	#NULL!	#NULL!	#NULL!	#NULL!	-330.599	-371.922	#NULL!	#NULL!	191.356	-201.512
165.155	-251.393	239.783	-531.866	#NULL!	#NULL!	-266.91	-112.103	-67.4332	-100.599	#NULL!	#NULL!	574.332	-256.17	484.62	-703.876	#NULL!	#NULL!	-132.766	-584.274	93.5654	407.258	#NULL!	#NULL!	-369.97	38.5182	374.641	-156.707	#NULL!	#NULL!	-352.897	-478.989	-225.849	-618.302	#NULL!	#NULL!	705.725	-607.666	134.38	-545.95	#NULL!	#NULL!	#NULL!	#NULL!	-259.815	-369.602	#NULL!	#NULL!	186.399	-201.478
160.238	-251.373	234.864	-531.846	#NULL!	#NULL!	-271.212	-112.085	-71.5406	-102.139	#NULL!	#NULL!	504.103	-255.753	602.915	-702.171	#NULL!	#NULL!	-235.651	-584.837	93.1864	412.351	#NULL!	#NULL!	-376.386	37.5226	420.111	-155.781	#NULL!	#NULL!	-356.107	-479.994	-230.134	-619.648	#NULL!	#NULL!	700.792	-607.656	163.927	-543.629	#NULL!	#NULL!	#NULL!	#NULL!	-272.74	-369.602	#NULL!	#NULL!	183.914	-202.619
344.624	-247.448	229.945	-531.827	#NULL!	#NULL!	-227.559	-107.597	-55.5333	-98.3118	#NULL!	#NULL!	409.238	-254.016	597.987	-702.144	#NULL!	#NULL!	-251.663	-583.568	92.3846	415.488	#NULL!	#NULL!	-398.829	37.5894	415.832	-155.773	#NULL!	#NULL!	-377.831	-478.577	-238.688	-618.615	#NULL!	#NULL!	695.859	-607.647	149.156	-543.243	#NULL!	#NULL!	#NULL!	#NULL!	-277.048	-369.602	#NULL!	#NULL!	192.622	-196.886
237.687	-248.186	225.026	-531.807	#NULL!	#NULL!	-243.535	-107.145	-61.6841	-98.6763	#NULL!	#NULL!	404.303	-255.161	588.13	-702.09	#NULL!	#NULL!	-260.293	-584.691	92.4212	421.362	#NULL!	#NULL!	-379.584	39.5614	390.157	-155.722	#NULL!	#NULL!	-392.438	-478.872	-307.154	-618.14	#NULL!	#NULL!	690.926	-607.637	145.46	-544.789	#NULL!	#NULL!	#NULL!	#NULL!	-299.821	-369.602	#NULL!	#NULL!	188.897	-198.018
232.775	-247	171.329	-531.202	#NULL!	#NULL!	-249.683	-107.509	-67.8205	-96.3166	#NULL!	#NULL!	383.358	-255.036	583.202	-702.063	#NULL!	#NULL!	-159.25	-582.942	101.104	430.713	#NULL!	#NULL!	-390.267	40.6078	381.599	-155.705	#NULL!	#NULL!	-441.597	-478.725	-311.439	-619.486	#NULL!	#NULL!	685.993	-607.628	126.999	-543.243	#NULL!	#NULL!	#NULL!	#NULL!	-325.67	-369.215	#NULL!	#NULL!	182.113	-192.176
189.756	-246.828	152.465	-532.683	#NULL!	#NULL!	-254.599	-107.489	-53.6661	-94.0384	#NULL!	#NULL!	378.43	-255.007	578.274	-702.036	#NULL!	#NULL!	-256.579	-581.19	107.294	435.378	#NULL!	#NULL!	-363.541	42.5575	370.901	-155.684	#NULL!	#NULL!	-434.108	-476.718	-332.831	-618.428	#NULL!	#NULL!	671.194	-607.599	121.459	-543.629	#NULL!	#NULL!	#NULL!	#NULL!	-318.28	-366.895	#NULL!	#NULL!	188.936	-191.065
185.455	-246.811	220.119	-529.452	#NULL!	#NULL!	-259.515	-107.469	-57.9764	-95.1886	#NULL!	#NULL!	373.501	-254.978	558.56	-701.929	#NULL!	#NULL!	-133.357	-579.573	97.4373	435.432	#NULL!	#NULL!	-371.026	41.5652	366.621	-155.675	#NULL!	#NULL!	-438.382	-476.706	-337.11	-618.42	#NULL!	#NULL!	666.26	-607.589	134.388	-541.309	#NULL!	#NULL!	#NULL!	#NULL!	-331.206	-367.281	#NULL!	#NULL!	177.169	-189.824
161.482	-247.881	215.201	-529.433	#NULL!	#NULL!	-263.208	-108.62	-64.119	-93.9965	#NULL!	#NULL!	569.416	-253.793	553.632	-701.902	#NULL!	#NULL!	-251.638	-578.871	92.509	435.459	#NULL!	#NULL!	-405.224	41.6669	363.412	-155.669	#NULL!	#NULL!	-350.385	-474.6	-215.143	-616.292	#NULL!	#NULL!	661.327	-607.58	152.857	-538.989	#NULL!	#NULL!	#NULL!	#NULL!	-261.655	-366.121	#NULL!	#NULL!	185.238	-187.562
157.8	-246.7	210.281	-529.413	#NULL!	#NULL!	-233.08	-105.244	-69.0318	-92.8093	#NULL!	#NULL!	550.935	-253.683	548.704	-701.875	#NULL!	#NULL!	-256.554	-576.493	105.475	440.088	#NULL!	#NULL!	-374.224	43.6039	360.242	-146.183	#NULL!	#NULL!	-374.788	-474.866	-219.427	-617.638	#NULL!	#NULL!	656.394	-607.57	147.933	-538.989	#NULL!	#NULL!	#NULL!	#NULL!	-273.964	-366.121	#NULL!	#NULL!	180.9	-187.532
228.483	-244.652	205.977	-529.395	#NULL!	#NULL!	-228.767	-102.541	-54.2625	-90.5334	#NULL!	#NULL!	546.012	-252.479	519.134	-701.714	#NULL!	#NULL!	-131.485	-574.888	100.547	440.114	#NULL!	#NULL!	-390.254	43.6516	357.027	-147.531	#NULL!	#NULL!	-387.612	-474.827	-354.218	-616.354	#NULL!	#NULL!	681.065	-605.3	145.469	-540.149	#NULL!	#NULL!	#NULL!	#NULL!	-297.353	-366.121	#NULL!	#NULL!	177.195	-185.188
342.185	-242.775	193.067	-528.955	#NULL!	#NULL!	-238.599	-102.501	-65.3302	-90.4891	#NULL!	#NULL!	497.961	-252.194	514.205	-701.688	#NULL!	#NULL!	-251.612	-573.783	95.0024	440.145	#NULL!	#NULL!	-369.94	45.6204	342.054	-146.486	#NULL!	#NULL!	-431.954	-472.666	-358.497	-616.346	#NULL!	#NULL!	676.131	-605.291	129.469	-538.989	#NULL!	#NULL!	#NULL!	#NULL!	-325.662	-364.574	#NULL!	#NULL!	182.785	-182.91
338.498	-242.761	186.916	-529.319	#NULL!	#NULL!	-244.746	-102.865	-53.0019	-84.7009	#NULL!	#NULL!	362.425	-252.564	509.277	-701.661	#NULL!	#NULL!	-257.762	-571.789	91.3062	440.165	#NULL!	#NULL!	-419.63	46.7829	314.235	-147.446	#NULL!	#NULL!	-436.228	-472.654	-361.707	-616.34	#NULL!	#NULL!	651.466	-605.243	124.545	-538.989	#NULL!	#NULL!	#NULL!	#NULL!	-278.882	-362.64	#NULL!	#NULL!	177.841	-180.557
184.86	-242.145	181.997	-529.299	#NULL!	#NULL!	-249.663	-102.846	-61.6102	-84.6664	#NULL!	#NULL!	563.268	-251.408	504.348	-701.634	#NULL!	#NULL!	-130.851	-571.369	91.3501	447.213	#NULL!	#NULL!	-438.332	46.8386	405.177	-145.595	#NULL!	#NULL!	-346.451	-470.892	-369.195	-616.325	#NULL!	#NULL!	646.533	-605.233	120.852	-538.989	#NULL!	#NULL!	#NULL!	#NULL!	-313.348	-362.254	#NULL!	#NULL!	172.897	-178.204
156.59	-242.032	177.078	-529.28	#NULL!	#NULL!	-254.579	-102.826	-57.9065	-81.957	#NULL!	#NULL!	492.225	-249.42	499.42	-701.607	#NULL!	#NULL!	-155.486	-570.048	98.7865	454.221	#NULL!	#NULL!	-415.881	48.801	399.832	-144.569	#NULL!	#NULL!	-350.191	-470.88	-225.476	-614.24	#NULL!	#NULL!	641.6	-605.223	134.397	-536.668	#NULL!	#NULL!	#NULL!	#NULL!	-319.503	-362.64	#NULL!	#NULL!	165.876	-177.769
227.888	-239.986	239.808	-527.196	#NULL!	#NULL!	-258.881	-102.809	-50.5178	-80.0408	#NULL!	#NULL!	486.884	-249.78	494.492	-701.58	#NULL!	#NULL!	-249.123	-569.101	96.315	453.06	#NULL!	#NULL!	-454.353	48.9155	395.553	-144.561	#NULL!	#NULL!	-372.103	-471.83	-236.531	-614.557	#NULL!	#NULL!	636.667	-605.214	160.251	-534.348	#NULL!	#NULL!	#NULL!	#NULL!	-333.046	-363.801	#NULL!	#NULL!	174.162	-173.578
224.201	-239.971	234.889	-527.176	#NULL!	#NULL!	-218.914	-97.9172	-55.4244	-77.6861	#NULL!	#NULL!	405.566	-249.297	489.563	-701.553	#NULL!	#NULL!	-254.67	-569.459	103.722	455.37	#NULL!	#NULL!	-458.628	48.9282	391.274	-144.552	#NULL!	#NULL!	-384.389	-470.779	-303.929	-614.423	#NULL!	#NULL!	631.731	-606.363	151.635	-534.348	#NULL!	#NULL!	#NULL!	#NULL!	-281.955	-360.32	#NULL!	#NULL!	163.008	-173.499
337.288	-238.093	229.97	-527.157	#NULL!	#NULL!	-225.061	-98.2811	-60.3434	-77.6664	#NULL!	#NULL!	371.683	-249.096	479.707	-701.5	#NULL!	#NULL!	-124.678	-569.057	92.6407	456.605	#NULL!	#NULL!	-461.838	47.9232	386.994	-144.544	#NULL!	#NULL!	-366.747	-468.802	-308.208	-614.414	#NULL!	#NULL!	710.668	-603.04	146.711	-534.348	#NULL!	#NULL!	#NULL!	#NULL!	-325.656	-361.48	#NULL!	#NULL!	171.709	-168.925
333.601	-238.078	225.051	-527.137	#NULL!	#NULL!	-229.977	-98.2615	-50.4931	-75.3709	#NULL!	#NULL!	366.139	-249.063	476.01	-701.48	#NULL!	#NULL!	-156.078	-565.348	97.5837	458.927	#NULL!	#NULL!	-465.04	48.9473	382.715	-144.535	#NULL!	#NULL!	-430.868	-468.611	-334.953	-614.361	#NULL!	#NULL!	705.735	-603.03	129.477	-534.348	#NULL!	#NULL!	#NULL!	#NULL!	-276.411	-357.613	#NULL!	#NULL!	166.752	-168.89
182.421	-237.473	170.942	-526.92	#NULL!	#NULL!	-234.894	-98.2418	-55.3998	-73.0161	#NULL!	#NULL!	558.351	-249.03	458.761	-701.386	#NULL!	#NULL!	-202.897	-565.07	93.2861	461.3	#NULL!	#NULL!	-405.19	49.7838	378.436	-144.527	#NULL!	#NULL!	-435.677	-468.597	-338.163	-614.355	#NULL!	#NULL!	700.802	-603.021	124.554	-534.348	#NULL!	#NULL!	#NULL!	#NULL!	-308.416	-358	#NULL!	#NULL!	161.795	-168.855
155.381	-237.364	158.03	-526.868	#NULL!	#NULL!	-239.196	-98.2245	-59.089	-73.0014	#NULL!	#NULL!	543.572	-247.768	573.36	-699.66	#NULL!	#NULL!	-246.637	-564.81	100.08	464.004	#NULL!	#NULL!	-420.147	50.843	374.157	-144.518	#NULL!	#NULL!	-346.438	-467.848	-212.986	-612.234	#NULL!	#NULL!	695.869	-603.011	120.861	-534.348	#NULL!	#NULL!	#NULL!	#NULL!	-313.34	-358	#NULL!	#NULL!	168.018	-164.263
225.45	-235.314	220.146	-524.393	#NULL!	#NULL!	-243.503	-99.3731	-50.4684	-70.7009	#NULL!	#NULL!	357.527	-246.663	568.432	-699.633	#NULL!	#NULL!	-251.565	-564.781	102.571	468.298	#NULL!	#NULL!	-476.253	51.0099	369.877	-144.51	#NULL!	#NULL!	-363.524	-464.753	-218.336	-612.562	#NULL!	#NULL!	690.936	-603.002	134.405	-532.028	#NULL!	#NULL!	#NULL!	#NULL!	-318.264	-358	#NULL!	#NULL!	163.06	-164.228
334.85	-233.42	213.995	-524.758	#NULL!	#NULL!	-248.414	-98.1876	-54.7602	-68.3486	#NULL!	#NULL!	553.442	-245.478	563.503	-699.606	#NULL!	#NULL!	-255.267	-565.933	98.8744	468.319	#NULL!	#NULL!	-415.868	51.8448	365.598	-144.501	#NULL!	#NULL!	-366.734	-465.758	-354.201	-612.292	#NULL!	#NULL!	686.003	-602.992	159.029	-529.707	#NULL!	#NULL!	#NULL!	#NULL!	-321.957	-358	#NULL!	#NULL!	159.342	-164.202
332.387	-234.576	209.076	-524.738	#NULL!	#NULL!	-252.716	-98.1704	-50.0318	-65.6434	#NULL!	#NULL!	538.656	-245.391	545.022	-699.506	#NULL!	#NULL!	-228.149	-563.746	106.296	472.977	#NULL!	#NULL!	-435.1	52.9167	353.832	-144.139	#NULL!	#NULL!	-381.692	-464.699	-370.248	-612.26	#NULL!	#NULL!	671.203	-602.963	154.105	-529.707	#NULL!	#NULL!	#NULL!	#NULL!	-253.019	-355.679	#NULL!	#NULL!	168.044	-159.627
179.983	-232.8	204.157	-524.718	#NULL!	#NULL!	-257.023	-99.3189	-45.5001	-61.3807	#NULL!	#NULL!	490.599	-246.279	484.65	-699.177	#NULL!	#NULL!	-156.67	-560.648	101.368	473.004	#NULL!	#NULL!	-499.225	52.0929	348.481	-144.467	#NULL!	#NULL!	-418.027	-464.591	-206.559	-610.215	#NULL!	#NULL!	666.27	-602.954	149.181	-529.707	#NULL!	#NULL!	#NULL!	#NULL!	-281.331	-355.679	#NULL!	#NULL!	163.08	-160.752
328.714	-231.064	199.238	-524.698	#NULL!	#NULL!	-203.735	-93.3149	-50.4191	-61.361	#NULL!	#NULL!	486.293	-245.08	601.713	-697.465	#NULL!	#NULL!	-202.263	-561.551	105.709	477.68	#NULL!	#NULL!	-399.825	54.841	344.202	-144.459	#NULL!	#NULL!	-427.645	-464.562	-223.677	-610.52	#NULL!	#NULL!	661.337	-602.944	145.488	-529.707	#NULL!	#NULL!	#NULL!	#NULL!	-292.412	-356.84	#NULL!	#NULL!	158.123	-160.717
222.397	-230.638	194.319	-524.679	#NULL!	#NULL!	-209.068	-94.8479	-43.0139	-56.3314	#NULL!	#NULL!	404.352	-245.767	596.784	-697.438	#NULL!	#NULL!	-246.612	-560.114	100.781	477.707	#NULL!	#NULL!	-419.596	54.8998	360.258	-142.459	#NULL!	#NULL!	-431.92	-464.549	-227.421	-610.512	#NULL!	#NULL!	656.404	-602.934	129.487	-529.32	#NULL!	#NULL!	#NULL!	#NULL!	-304.719	-355.679	#NULL!	#NULL!	165.585	-156.133
333.64	-228.752	189.4	-524.659	#NULL!	#NULL!	-215.209	-93.6575	-48.5498	-56.6984	#NULL!	#NULL!	371.708	-244.399	591.856	-697.411	#NULL!	#NULL!	-250.309	-560.091	96.4614	476.555	#NULL!	#NULL!	-479.976	55.0795	395.57	-140.498	#NULL!	#NULL!	-435.13	-465.555	-235.445	-610.496	#NULL!	#NULL!	715.606	-600.732	123.331	-529.707	#NULL!	#NULL!	#NULL!	#NULL!	-272.712	-354.519	#NULL!	#NULL!	153.263	-143.299
328.734	-226.401	184.481	-524.639	#NULL!	#NULL!	-220.125	-93.6379	-51.6304	-57.8535	#NULL!	#NULL!	362.467	-244.344	586.928	-697.384	#NULL!	#NULL!	-124.629	-559.663	106.347	481.201	#NULL!	#NULL!	-436.156	55.9637	391.825	-140.491	#NULL!	#NULL!	-344.805	-460.75	-300.702	-610.367	#NULL!	#NULL!	681.074	-600.665	120.867	-530.867	#NULL!	#NULL!	#NULL!	#NULL!	-314.562	-353.359	#NULL!	#NULL!	150.178	-140.959
325.047	-226.386	180.177	-524.622	#NULL!	#NULL!	-223.817	-94.7888	-40.5298	-51.6713	#NULL!	#NULL!	543.591	-244.246	581.999	-697.357	#NULL!	#NULL!	-244.124	-555.431	100.81	482.406	#NULL!	#NULL!	-498.135	57.1628	383.802	-140.475	#NULL!	#NULL!	-360.836	-460.702	-308.191	-610.352	#NULL!	#NULL!	676.141	-600.655	159.037	-525.066	#NULL!	#NULL!	#NULL!	#NULL!	-319.486	-353.359	#NULL!	#NULL!	145.853	-138.611
221.187	-225.97	174.643	-524.6	#NULL!	#NULL!	-228.734	-94.7691	-46.0657	-52.0383	#NULL!	#NULL!	399.442	-242.215	577.071	-697.331	#NULL!	#NULL!	-247.82	-555.409	96.498	482.429	#NULL!	#NULL!	-420.117	57.9452	379.523	-140.466	#NULL!	#NULL!	-428.697	-460.5	-334.936	-610.299	#NULL!	#NULL!	651.476	-600.607	155.345	-525.066	#NULL!	#NULL!	#NULL!	#NULL!	-321.95	-354.519	#NULL!	#NULL!	141.516	-138.581
332.431	-224.084	241.062	-522.531	#NULL!	#NULL!	-233.65	-94.7495	-35.5882	-47.4102	#NULL!	#NULL!	366.17	-243.192	558.592	-696.838	#NULL!	#NULL!	-245.331	-550.727	105.768	487.078	#NULL!	#NULL!	-499.191	60.2098	375.243	-140.458	#NULL!	#NULL!	-432.437	-460.489	-357.757	-609.915	#NULL!	#NULL!	646.543	-600.597	129.495	-525.066	#NULL!	#NULL!	#NULL!	#NULL!	-249.317	-351.039	#NULL!	#NULL!	150.823	-136.328
326.295	-221.728	236.143	-522.511	#NULL!	#NULL!	-247.165	-93.5296	-40.5072	-47.3905	#NULL!	#NULL!	357.545	-243.141	552.429	-697.197	#NULL!	#NULL!	-250.26	-550.698	101.448	485.926	#NULL!	#NULL!	-525.908	60.2893	372.034	-140.451	#NULL!	#NULL!	-344.788	-456.692	-211.901	-608.512	#NULL!	#NULL!	641.609	-600.588	124.571	-525.066	#NULL!	#NULL!	#NULL!	#NULL!	-289.941	-352.199	#NULL!	#NULL!	145.879	-133.976
322.608	-221.713	231.224	-522.492	#NULL!	#NULL!	-252.087	-94.6757	-45.4262	-47.3708	#NULL!	#NULL!	552.234	-240.774	547.501	-697.17	#NULL!	#NULL!	-277.366	-550.537	103.949	491.787	#NULL!	#NULL!	-424.375	62.0164	363.476	-140.434	#NULL!	#NULL!	-360.284	-456.646	-219.389	-608.497	#NULL!	#NULL!	637.909	-600.581	120.878	-525.066	#NULL!	#NULL!	#NULL!	#NULL!	-298.551	-348.718	#NULL!	#NULL!	140.922	-133.941
220.592	-221.305	226.305	-522.472	#NULL!	#NULL!	-199.21	-89.0585	-49.1154	-47.356	#NULL!	#NULL!	534.985	-240.672	534.772	-696.709	#NULL!	#NULL!	-249.003	-546.009	106.443	496.472	#NULL!	#NULL!	-517.346	63.3077	356.345	-140.082	#NULL!	#NULL!	-429.748	-456.439	-370.231	-608.197	#NULL!	#NULL!	557.747	-600.038	159.046	-520.426	#NULL!	#NULL!	#NULL!	#NULL!	-303.475	-348.718	#NULL!	#NULL!	149.61	-131.684
216.905	-221.29	168.509	-521.851	#NULL!	#NULL!	-204.127	-89.0389	-30.6568	-45.095	#NULL!	#NULL!	483.853	-240.368	519.163	-697.015	#NULL!	#NULL!	-253.932	-545.98	107.088	501.168	#NULL!	#NULL!	-529.636	63.3443	352.774	-141.429	#NULL!	#NULL!	-432.959	-457.444	-204.404	-606.496	#NULL!	#NULL!	519.512	-601.509	155.353	-520.426	#NULL!	#NULL!	#NULL!	#NULL!	-318.246	-348.332	#NULL!	#NULL!	136.393	-131.205
329.993	-219.411	162.358	-522.216	#NULL!	#NULL!	-218.876	-88.9798	-67.5473	-44.5579	#NULL!	#NULL!	479.534	-241.517	514.234	-696.989	#NULL!	#NULL!	-258.232	-543.606	102.159	501.195	#NULL!	#NULL!	-534.449	62.344	343.145	-141.41	#NULL!	#NULL!	-419.587	-454.44	-223.302	-606.12	#NULL!	#NULL!	710.678	-598.018	129.503	-520.426	#NULL!	#NULL!	#NULL!	#NULL!	-248.08	-347.558	#NULL!	#NULL!	143.429	-128.936
171.849	-218.39	158.054	-522.198	#NULL!	#NULL!	-223.793	-88.9601	-71.2447	-46.0997	#NULL!	#NULL!	353.251	-239.593	509.306	-696.962	#NULL!	#NULL!	-248.979	-541.312	110.19	504.675	#NULL!	#NULL!	-538.724	62.3567	392.377	-136.429	#NULL!	#NULL!	-425.107	-454.085	-227.943	-607.465	#NULL!	#NULL!	704.511	-598.392	124.579	-520.426	#NULL!	#NULL!	#NULL!	#NULL!	-273.312	-346.398	#NULL!	#NULL!	134.764	-126.944
323.858	-216.667	220.169	-520.112	#NULL!	#NULL!	-245.922	-90.0373	-10.9685	-42.8389	#NULL!	#NULL!	474.624	-237.965	504.378	-696.935	#NULL!	#NULL!	-253.907	-541.283	104.037	505.884	#NULL!	#NULL!	-543.529	63.3856	388.098	-136.421	#NULL!	#NULL!	-419.04	-451.398	-232.218	-606.44	#NULL!	#NULL!	699.578	-598.383	119.656	-520.426	#NULL!	#NULL!	#NULL!	#NULL!	-286.233	-344.078	#NULL!	#NULL!	142.213	-124.678
318.94	-217.036	215.25	-520.092	#NULL!	#NULL!	-199.191	-84.3956	-25.7235	-42.3906	#NULL!	#NULL!	394.538	-237.489	499.449	-696.908	#NULL!	#NULL!	-260.056	-538.898	101.565	504.723	#NULL!	#NULL!	-537.638	66.4119	383.819	-136.412	#NULL!	#NULL!	-423.311	-450.37	-235.428	-606.434	#NULL!	#NULL!	694.645	-598.373	159.055	-515.785	#NULL!	#NULL!	#NULL!	#NULL!	-290.542	-344.078	#NULL!	#NULL!	137.256	-124.644
216.925	-216.627	210.331	-520.073	#NULL!	#NULL!	-204.107	-84.3759	-35.5615	-42.3511	#NULL!	#NULL!	548.556	-237.23	493.289	-696.874	#NULL!	#NULL!	-262.526	-540.057	115.14	508.173	#NULL!	#NULL!	-432.895	69.1441	379.536	-137.419	#NULL!	#NULL!	-426.517	-450.361	-301.755	-606.302	#NULL!	#NULL!	689.712	-598.364	155.362	-515.785	#NULL!	#NULL!	#NULL!	#NULL!	-301.005	-344.078	#NULL!	#NULL!	131.692	-122.287
173.916	-214.123	205.412	-520.053	#NULL!	#NULL!	-209.024	-84.3562	-41.7123	-42.7156	#NULL!	#NULL!	543.627	-237.201	488.361	-696.848	#NULL!	#NULL!	-159.012	-537.149	103.45	510.586	#NULL!	#NULL!	-440.38	68.1517	375.26	-136.395	#NULL!	#NULL!	-415.822	-448.363	-308.174	-606.289	#NULL!	#NULL!	684.779	-598.354	129.512	-515.785	#NULL!	#NULL!	#NULL!	#NULL!	-304.698	-344.078	#NULL!	#NULL!	141	-120.034
168.999	-214.104	200.487	-521.201	#NULL!	#NULL!	-213.94	-84.3365	-46.6313	-42.6959	#NULL!	#NULL!	538.705	-235.997	479.738	-696.409	#NULL!	#NULL!	-175.645	-537.051	116.394	511.69	#NULL!	#NULL!	-443.586	68.1613	370.981	-136.387	#NULL!	#NULL!	-423.294	-446.312	-332.78	-606.241	#NULL!	#NULL!	671.214	-597.941	124.588	-515.785	#NULL!	#NULL!	#NULL!	#NULL!	-317.623	-344.078	#NULL!	#NULL!	136.662	-120.004
322.647	-212.387	194.344	-520.009	#NULL!	#NULL!	-218.857	-84.3168	-51.5502	-42.6762	#NULL!	#NULL!	530.081	-235.946	474.8	-697.948	#NULL!	#NULL!	-218.158	-537.972	102.951	529.386	#NULL!	#NULL!	-560.068	69.5226	359.214	-136.363	#NULL!	#NULL!	-426.5	-446.302	-359.525	-606.188	#NULL!	#NULL!	665.046	-598.316	119.664	-515.785	#NULL!	#NULL!	#NULL!	#NULL!	-271.457	-341.37	#NULL!	#NULL!	132.338	-117.656
317.731	-212.368	189.425	-519.989	#NULL!	#NULL!	-223.773	-84.2972	-54.0159	-43.8338	#NULL!	#NULL!	483.255	-236.842	458.174	-696.683	#NULL!	#NULL!	-272.37	-537.65	122.679	531.628	#NULL!	#NULL!	-567.014	69.5432	354.934	-136.355	#NULL!	#NULL!	-415.809	-445.32	-361.668	-607.199	#NULL!	#NULL!	660.113	-598.306	115.975	-513.465	#NULL!	#NULL!	#NULL!	#NULL!	-277.612	-341.757	#NULL!	#NULL!	138.541	-116.54
312.815	-212.348	184.506	-519.969	#NULL!	#NULL!	-228.689	-84.2775	-7.26696	-40.5187	#NULL!	#NULL!	389.006	-235.108	570.925	-694.948	#NULL!	#NULL!	-124.507	-536.18	103.597	534.081	#NULL!	#NULL!	-437.165	70.1714	368.315	-134.35	#NULL!	#NULL!	-412.056	-442.287	-212.952	-604.109	#NULL!	#NULL!	655.18	-598.296	159.063	-511.144	#NULL!	#NULL!	#NULL!	#NULL!	-294.23	-341.757	#NULL!	#NULL!	124.908	-116.444
212.028	-211.945	182.04	-521.127	#NULL!	#NULL!	-236.069	-85.4137	-11.5587	-38.1665	#NULL!	#NULL!	353.893	-234.508	565.997	-694.921	#NULL!	#NULL!	-261.263	-534.194	121.469	535.159	#NULL!	#NULL!	-555.784	71.5391	333.543	-135.297	#NULL!	#NULL!	-422.208	-442.257	-218.302	-604.437	#NULL!	#NULL!	570.084	-598.131	155.37	-511.144	#NULL!	#NULL!	#NULL!	#NULL!	-284.994	-339.437	#NULL!	#NULL!	134.836	-114.196
165.936	-211.76	233.708	-517.832	#NULL!	#NULL!	-193.843	-79.3654	-23.2393	-37.7305	#NULL!	#NULL!	348.957	-236.045	462.501	-694.357	#NULL!	#NULL!	-240.305	-531.97	106.706	538.764	#NULL!	#NULL!	-433.951	72.1911	393.46	-133.385	#NULL!	#NULL!	-426.483	-442.244	-369.679	-604.136	#NULL!	#NULL!	565.768	-598.122	129.52	-511.144	#NULL!	#NULL!	#NULL!	#NULL!	-289.918	-339.437	#NULL!	#NULL!	124.934	-111.809
317.751	-207.705	228.789	-517.812	#NULL!	#NULL!	-200.4	-79.7277	-29.3901	-38.095	#NULL!	#NULL!	345.267	-234.849	600.51	-692.759	#NULL!	#NULL!	-265.356	-531.43	123.368	543.372	#NULL!	#NULL!	-565.394	73.5969	385.971	-133.37	#NULL!	#NULL!	-428.624	-443.252	-203.317	-602.435	#NULL!	#NULL!	538.02	-597.682	124.597	-511.144	#NULL!	#NULL!	#NULL!	#NULL!	-297.303	-339.437	#NULL!	#NULL!	131.151	-108.376
312.834	-207.685	223.87	-517.792	#NULL!	#NULL!	-205.317	-79.708	-34.3091	-38.0752	#NULL!	#NULL!	479.571	-234.472	595.582	-692.732	#NULL!	#NULL!	-258.775	-529.512	107.96	542.281	#NULL!	#NULL!	-571.806	73.616	381.696	-132.346	#NULL!	#NULL!	-353.27	-440.433	-223.642	-602.056	#NULL!	#NULL!	534.317	-599.22	119.673	-511.144	#NULL!	#NULL!	#NULL!	#NULL!	-303.46	-340.597	#NULL!	#NULL!	126.219	-103.705
309.147	-207.67	170.993	-517.191	#NULL!	#NULL!	-210.233	-79.6883	-39.2281	-38.0555	#NULL!	#NULL!	474.649	-233.268	590.653	-692.705	#NULL!	#NULL!	-151.571	-527.8	122.782	548.074	#NULL!	#NULL!	-578.222	72.6205	377.417	-132.337	#NULL!	#NULL!	-407.772	-440.27	-302.45	-601.9	#NULL!	#NULL!	678.617	-596.024	114.753	-508.824	#NULL!	#NULL!	#NULL!	#NULL!	-250.932	-336.73	#NULL!	#NULL!	122.495	-104.838
207.746	-207.264	164.842	-517.555	#NULL!	#NULL!	-215.149	-79.6686	-41.6938	-39.2131	#NULL!	#NULL!	470.336	-233.243	585.725	-692.679	#NULL!	#NULL!	-213.175	-527.434	107.999	548.546	#NULL!	#NULL!	-587.841	72.6491	373.138	-132.329	#NULL!	#NULL!	-414.71	-438.221	-309.762	-602.224	#NULL!	#NULL!	649.019	-595.967	161.534	-506.503	#NULL!	#NULL!	#NULL!	#NULL!	-268.372	-337.116	#NULL!	#NULL!	125.006	-99.0611
164.727	-207.092	160.538	-517.538	#NULL!	#NULL!	-220.066	-79.6489	-30.5952	-33.4201	#NULL!	#NULL!	533.801	-231.271	580.797	-692.652	#NULL!	#NULL!	-240.69	-526.879	117.868	550.451	#NULL!	#NULL!	-562.184	74.602	352.812	-132.288	#NULL!	#NULL!	-424.329	-438.192	-332.761	-601.84	#NULL!	#NULL!	644.086	-595.957	156.61	-506.503	#NULL!	#NULL!	#NULL!	#NULL!	-273.913	-338.277	#NULL!	#NULL!	122.521	-100.203
314.083	-203.027	217.736	-515.043	#NULL!	#NULL!	-224.982	-79.6292	-35.5142	-33.4003	#NULL!	#NULL!	525.177	-231.22	575.868	-692.625	#NULL!	#NULL!	-264.923	-527.127	122.811	552.773	#NULL!	#NULL!	-591.038	74.6878	350.668	-133.3	#NULL!	#NULL!	-351.116	-436.38	-337.042	-602.17	#NULL!	#NULL!	639.152	-595.947	129.529	-506.503	#NULL!	#NULL!	#NULL!	#NULL!	-277.606	-338.277	#NULL!	#NULL!	118.19	-99.0133
309.167	-203.007	211.585	-515.408	#NULL!	#NULL!	-228.675	-80.7802	-39.2034	-33.3856	#NULL!	#NULL!	384.718	-230.386	561.083	-692.544	#NULL!	#NULL!	-267.393	-528.286	112.954	552.827	#NULL!	#NULL!	-573.931	76.6662	368.869	-129.95	#NULL!	#NULL!	-412.56	-435.183	-357.368	-602.129	#NULL!	#NULL!	634.836	-595.939	124.605	-506.503	#NULL!	#NULL!	#NULL!	#NULL!	-291.14	-334.796	#NULL!	#NULL!	123.787	-95.5758
207.151	-202.599	207.281	-515.39	#NULL!	#NULL!	-186.86	-75.1188	-30.5685	-28.3609	#NULL!	#NULL!	379.79	-230.357	556.155	-692.518	#NULL!	#NULL!	-257.524	-525.996	108.026	552.854	#NULL!	#NULL!	-461.173	79.3744	364.588	-130.28	#NULL!	#NULL!	-416.296	-434.157	-209.727	-600.391	#NULL!	#NULL!	575.022	-595.823	119.681	-506.503	#NULL!	#NULL!	#NULL!	#NULL!	-295.448	-334.796	#NULL!	#NULL!	113.872	-95.5062
165.986	-200.102	190.673	-516.491	#NULL!	#NULL!	-191.777	-75.0992	-36.7193	-28.7254	#NULL!	#NULL!	370.549	-230.302	551.226	-692.491	#NULL!	#NULL!	-151.546	-523.103	104.322	551.699	#NULL!	#NULL!	-579.266	78.7113	347.467	-131.262	#NULL!	#NULL!	-420.041	-435.161	-214.006	-600.383	#NULL!	#NULL!	560.223	-595.794	114.762	-504.183	#NULL!	#NULL!	#NULL!	#NULL!	-246.821	-332.089	#NULL!	#NULL!	112.659	-90.862
312.874	-198.359	184.531	-515.299	#NULL!	#NULL!	-196.693	-75.0795	-40.4085	-28.7107	#NULL!	#NULL!	353.3	-230.199	546.298	-692.464	#NULL!	#NULL!	-213.151	-522.737	116.665	555.156	#NULL!	#NULL!	-586.746	78.7335	343.188	-131.253	#NULL!	#NULL!	-404.524	-430.134	-218.285	-600.374	#NULL!	#NULL!	555.289	-595.784	156.616	-503.023	#NULL!	#NULL!	#NULL!	#NULL!	-250.516	-333.636	#NULL!	#NULL!	118.268	-85.1067
307.957	-198.339	179.612	-515.279	#NULL!	#NULL!	-201.61	-75.0598	-13.3356	-25.3167	#NULL!	#NULL!	348.981	-231.348	541.37	-692.437	#NULL!	#NULL!	-239.031	-523.758	110.933	557.929	#NULL!	#NULL!	-593.159	78.7526	378.504	-128.277	#NULL!	#NULL!	-414.676	-430.104	-369.132	-601.09	#NULL!	#NULL!	517.056	-596.869	145.538	-503.023	#NULL!	#NULL!	#NULL!	#NULL!	-268.974	-330.155	#NULL!	#NULL!	112.704	-82.7498
305.494	-199.495	228.814	-513.142	#NULL!	#NULL!	-206.526	-75.0401	-17.6335	-24.1319	#NULL!	#NULL!	342.829	-229.746	536.441	-692.41	#NULL!	#NULL!	-267.363	-522.415	106.816	556.385	#NULL!	#NULL!	-602.238	79.7943	374.225	-128.268	#NULL!	#NULL!	-401.84	-427.098	-197.951	-598.383	#NULL!	#NULL!	713.152	-594.933	129.537	-501.863	#NULL!	#NULL!	#NULL!	#NULL!	-272.667	-330.155	#NULL!	#NULL!	108.38	-80.4016
208.395	-199.107	223.895	-513.122	#NULL!	#NULL!	-211.442	-75.0204	-28.0864	-24.09	#NULL!	#NULL!	466.048	-228.52	532.129	-692.387	#NULL!	#NULL!	-151.522	-518.407	113.013	562.225	#NULL!	#NULL!	-612.386	80.8391	368.886	-125.888	#NULL!	#NULL!	-406.11	-426.071	-201.164	-599.393	#NULL!	#NULL!	708.221	-593.764	124.614	-501.863	#NULL!	#NULL!	#NULL!	#NULL!	-281.283	-329.769	#NULL!	#NULL!	104.055	-78.0534
164.776	-195.435	173.477	-512.531	#NULL!	#NULL!	-216.364	-76.1665	-31.7818	-25.2427	#NULL!	#NULL!	530.123	-227.727	519.185	-693.491	#NULL!	#NULL!	-213.126	-518.041	108.701	562.249	#NULL!	#NULL!	-462.763	82.423	364.07	-126.217	#NULL!	#NULL!	-410.385	-426.058	-223.625	-597.994	#NULL!	#NULL!	703.288	-593.754	119.69	-501.863	#NULL!	#NULL!	#NULL!	#NULL!	-287.438	-330.155	#NULL!	#NULL!	107.799	-73.4439
309.201	-194.847	168.55	-514.068	#NULL!	#NULL!	-221.89	-74.9786	-44.0731	-24.0259	#NULL!	#NULL!	521.505	-226.501	514.264	-692.289	#NULL!	#NULL!	-256.25	-517.785	114.274	566.917	#NULL!	#NULL!	-473.98	83.471	375.307	-125.224	#NULL!	#NULL!	-414.125	-426.047	-228.975	-598.322	#NULL!	#NULL!	698.355	-593.745	114.77	-499.542	#NULL!	#NULL!	#NULL!	#NULL!	-291.134	-331.316	#NULL!	#NULL!	102.842	-73.4091
304.29	-193.662	162.408	-512.875	#NULL!	#NULL!	-226.197	-76.1271	-48.9921	-24.0062	#NULL!	#NULL!	459.902	-225.744	509.335	-692.263	#NULL!	#NULL!	-267.338	-517.719	109.346	566.944	#NULL!	#NULL!	-477.177	85.5098	327.171	-124.112	#NULL!	#NULL!	-397.556	-425.082	-233.254	-598.313	#NULL!	#NULL!	693.421	-593.735	129.546	-497.222	#NULL!	#NULL!	#NULL!	#NULL!	-244.353	-328.995	#NULL!	#NULL!	102.861	-69.9325
299.988	-193.644	158.718	-512.861	#NULL!	#NULL!	-183.163	-72.8021	-6.54113	-19.5063	#NULL!	#NULL!	382.278	-225.675	504.407	-692.236	#NULL!	#NULL!	-238.372	-515.542	106.874	565.783	#NULL!	#NULL!	-620.914	85.9376	325.027	-125.124	#NULL!	#NULL!	-405.559	-422.014	-236.998	-598.306	#NULL!	#NULL!	688.488	-593.726	124.622	-497.222	#NULL!	#NULL!	#NULL!	#NULL!	-249.275	-327.835	#NULL!	#NULL!	97.9236	-66.4211
188.755	-192.81	217.761	-510.373	#NULL!	#NULL!	-177.008	-70.4952	-21.2981	-19.4472	#NULL!	#NULL!	369.951	-226.776	500.703	-693.39	#NULL!	#NULL!	-151.497	-513.71	113.071	571.623	#NULL!	#NULL!	-607.017	86.9108	363.552	-122.153	#NULL!	#NULL!	-411.971	-421.995	-289.954	-598.201	#NULL!	#NULL!	683.555	-593.716	119.698	-497.222	#NULL!	#NULL!	#NULL!	#NULL!	-268.966	-325.515	#NULL!	#NULL!	95.4645	-62.927
182.608	-193.174	211.61	-510.738	#NULL!	#NULL!	-189.297	-70.0575	-29.2915	-19.4151	#NULL!	#NULL!	359.485	-225.539	488.39	-692.149	#NULL!	#NULL!	-253.761	-513.102	108.136	570.475	#NULL!	#NULL!	-625.181	87.9795	361.408	-123.165	#NULL!	#NULL!	-415.711	-421.984	-294.233	-598.192	#NULL!	#NULL!	673.689	-593.697	172.634	-494.902	#NULL!	#NULL!	#NULL!	#NULL!	-273.889	-325.515	#NULL!	#NULL!	71.9498	-56.9674
177.692	-193.155	207.306	-510.721	#NULL!	#NULL!	-195.445	-70.4214	-43.4336	-19.3584	#NULL!	#NULL!	352.708	-225.499	483.462	-692.122	#NULL!	#NULL!	-257.463	-514.255	113.101	576.322	#NULL!	#NULL!	-477.699	88.5552	358.212	-120.111	#NULL!	#NULL!	-353.185	-420.14	-297.977	-598.185	#NULL!	#NULL!	668.756	-593.687	115.394	-494.902	#NULL!	#NULL!	#NULL!	#NULL!	-278.813	-325.515	#NULL!	#NULL!	90.5463	-55.9389
296.31	-191.298	180.866	-510.615	#NULL!	#NULL!	-200.361	-70.4017	8.24052	-14.8956	#NULL!	#NULL!	345.309	-226.629	479.758	-693.276	#NULL!	#NULL!	-267.314	-513.022	118.044	578.645	#NULL!	#NULL!	-621.97	88.9846	326.118	-120.048	#NULL!	#NULL!	-406.076	-417.954	-302.256	-598.176	#NULL!	#NULL!	663.823	-593.678	149.865	-492.581	#NULL!	#NULL!	#NULL!	#NULL!	-283.737	-325.515	#NULL!	#NULL!	80.6839	-46.5983
200.44	-190.914	225.149	-508.457	#NULL!	#NULL!	-205.277	-70.3821	-3.44004	-14.4595	#NULL!	#NULL!	340.387	-225.426	457.588	-691.981	#NULL!	#NULL!	-208.161	-511.025	122.987	580.967	#NULL!	#NULL!	-646.011	90.0708	321.839	-120.039	#NULL!	#NULL!	-412.487	-417.596	-328.466	-598.124	#NULL!	#NULL!	658.89	-593.668	140.633	-492.581	#NULL!	#NULL!	#NULL!	#NULL!	-288.661	-325.515	#NULL!	#NULL!	72.0433	-40.3567
162.952	-190.764	175.959	-508.26	#NULL!	#NULL!	-208.97	-71.533	-8.36726	-15.9965	#NULL!	#NULL!	525.213	-224.175	452.659	-691.954	#NULL!	#NULL!	-237.732	-510.849	113.13	581.021	#NULL!	#NULL!	-490.506	92.6518	362.499	-118.089	#NULL!	#NULL!	-415.699	-418.94	-332.746	-598.116	#NULL!	#NULL!	653.957	-593.659	129.555	-492.581	#NULL!	#NULL!	#NULL!	#NULL!	-246.804	-323.194	#NULL!	#NULL!	66.4772	-38.3861
160.489	-191.92	171.655	-508.243	#NULL!	#NULL!	-172.082	-68.1834	-32.954	-14.3412	#NULL!	#NULL!	517.412	-223.737	448.963	-691.934	#NULL!	#NULL!	-150.857	-509.017	118.689	583.34	#NULL!	#NULL!	-497.983	93.6887	318.633	-119.017	#NULL!	#NULL!	-336.608	-417.146	-336.49	-598.108	#NULL!	#NULL!	570.094	-593.109	124.631	-492.581	#NULL!	#NULL!	#NULL!	#NULL!	-268.957	-320.874	#NULL!	#NULL!	72.0607	-37.2663
135.912	-190.656	220.243	-506.102	#NULL!	#NULL!	-181.915	-68.1441	-38.49	-14.7082	#NULL!	#NULL!	461.772	-221.45	570.957	-689.857	#NULL!	#NULL!	-251.272	-508.421	123.016	585.666	#NULL!	#NULL!	-632.64	93.0748	358.587	-115.711	#NULL!	#NULL!	-351.569	-417.101	-210.78	-596.327	#NULL!	#NULL!	563.927	-593.483	120.323	-492.581	#NULL!	#NULL!	#NULL!	#NULL!	-273.881	-320.874	#NULL!	#NULL!	67.1165	-34.9138
300.622	-188.984	215.324	-506.083	#NULL!	#NULL!	-176.988	-65.8323	-41.5705	-15.8633	#NULL!	#NULL!	453.764	-221.402	564.794	-690.215	#NULL!	#NULL!	-208.137	-506.328	112.543	585.723	#NULL!	#NULL!	-635.846	93.0844	347.532	-115.689	#NULL!	#NULL!	-393.778	-415.961	-218.268	-596.312	#NULL!	#NULL!	551.184	-593.072	176.746	-489.874	#NULL!	#NULL!	#NULL!	#NULL!	-278.805	-320.874	#NULL!	#NULL!	63.3985	-34.8877
196.148	-188.566	210.405	-506.063	#NULL!	#NULL!	-186.821	-65.7929	13.7888	-12.1936	#NULL!	#NULL!	378.606	-220.956	462.533	-689.267	#NULL!	#NULL!	-235.243	-506.167	118.102	588.043	#NULL!	#NULL!	-646.529	94.1308	342.182	-116.017	#NULL!	#NULL!	-330.187	-415.136	-368.041	-596.014	#NULL!	#NULL!	541.728	-593.44	144.33	-490.261	#NULL!	#NULL!	#NULL!	#NULL!	-283.728	-320.874	#NULL!	#NULL!	-18.1235	14.3594
191.232	-188.546	206.709	-507.216	#NULL!	#NULL!	-191.738	-65.7732	3.95078	-12.1541	#NULL!	#NULL!	349.03	-221.954	593.147	-688.02	#NULL!	#NULL!	-147.758	-505.512	123.661	590.362	#NULL!	#NULL!	-664.696	94.1849	326.13	-117.001	#NULL!	#NULL!	-386.823	-413.953	-197.938	-595.337	#NULL!	#NULL!	537.412	-593.432	149.874	-487.94	#NULL!	#NULL!	#NULL!	#NULL!	-288.652	-320.874	#NULL!	#NULL!	-65.1985	18.1666
186.315	-188.526	180.893	-505.555	#NULL!	#NULL!	-196.654	-65.7535	-15.1124	-12.4669	#NULL!	#NULL!	345.334	-221.933	588.218	-687.993	#NULL!	#NULL!	-252.48	-503.716	113.189	590.419	#NULL!	#NULL!	-501.176	96.7421	321.851	-116.992	#NULL!	#NULL!	-413.54	-413.873	-201.678	-594.313	#NULL!	#NULL!	678.625	-592.548	140.642	-487.94	#NULL!	#NULL!	#NULL!	#NULL!	-244.334	-318.553	#NULL!	#NULL!	-76.3329	21.7215
181.399	-188.507	152.607	-505.831	#NULL!	#NULL!	-201.57	-65.7338	-21.2611	-12.4422	#NULL!	#NULL!	336.709	-221.881	583.29	-687.966	#NULL!	#NULL!	-206.881	-501.639	118.132	592.742	#NULL!	#NULL!	-645.447	97.1714	358.241	-113.002	#NULL!	#NULL!	-386.272	-409.896	-227.892	-595.277	#NULL!	#NULL!	649.028	-591.331	128.332	-487.94	#NULL!	#NULL!	#NULL!	#NULL!	-268.948	-316.233	#NULL!	#NULL!	-82.497	27.5594
176.482	-188.487	223.944	-503.782	#NULL!	#NULL!	-206.487	-65.7142	-3.41744	-10.1787	#NULL!	#NULL!	515.381	-219.42	578.362	-687.939	#NULL!	#NULL!	-233.37	-501.481	123.075	595.064	#NULL!	#NULL!	-664.145	98.2417	353.966	-111.978	#NULL!	#NULL!	-401.233	-409.851	-232.167	-594.253	#NULL!	#NULL!	644.095	-591.322	123.408	-487.94	#NULL!	#NULL!	#NULL!	#NULL!	-273.872	-316.233	#NULL!	#NULL!	-78.1462	29.8467
172.795	-188.472	173.937	-503.192	#NULL!	#NULL!	-172.062	-63.5205	-25.5529	-10.09	#NULL!	#NULL!	511.678	-220.572	558.648	-687.832	#NULL!	#NULL!	-252.456	-499.02	113.218	595.118	#NULL!	#NULL!	-670.027	97.2446	349.687	-111.969	#NULL!	#NULL!	-411.386	-409.821	-235.381	-595.262	#NULL!	#NULL!	639.162	-591.312	119.713	-489.101	#NULL!	#NULL!	#NULL!	#NULL!	-278.796	-316.233	#NULL!	#NULL!	-82.4774	31.0361
294.488	-186.239	217.81	-501.033	#NULL!	#NULL!	-181.895	-63.4811	-30.4719	-10.0702	#NULL!	#NULL!	331.799	-218.33	553.72	-687.805	#NULL!	#NULL!	-254.926	-500.179	118.163	597.832	#NULL!	#NULL!	-494.755	98.7522	345.408	-111.961	#NULL!	#NULL!	-313.059	-408.084	-289.937	-594.138	#NULL!	#NULL!	635.46	-592.464	177.575	-485.62	#NULL!	#NULL!	#NULL!	#NULL!	-283.72	-316.233	#NULL!	#NULL!	-86.1693	35.6977
201.074	-186.254	211.659	-501.398	#NULL!	#NULL!	-176.969	-61.1693	-35.3909	-10.0505	#NULL!	#NULL!	508	-217.027	548.792	-687.778	#NULL!	#NULL!	-226.57	-496.825	112.631	599.821	#NULL!	#NULL!	-539.64	98.8858	341.129	-111.952	#NULL!	#NULL!	-309.844	-406.065	-294.216	-594.13	#NULL!	#NULL!	630.529	-591.295	175.111	-486.78	#NULL!	#NULL!	#NULL!	#NULL!	-287.413	-316.233	#NULL!	#NULL!	-99.1757	36.9479
161.743	-186.096	209.194	-502.555	#NULL!	#NULL!	-186.801	-61.1299	-39.0802	-10.0357	#NULL!	#NULL!	456.252	-216.72	543.863	-687.751	#NULL!	#NULL!	-230.882	-496.799	123.118	602.113	#NULL!	#NULL!	-655.057	99.2293	336.85	-111.944	#NULL!	#NULL!	-333.889	-405.993	-297.96	-594.122	#NULL!	#NULL!	557.766	-591.154	107.41	-485.62	#NULL!	#NULL!	#NULL!	#NULL!	-244.325	-313.913	#NULL!	#NULL!	-97.9103	41.5747
287.736	-184.269	185.834	-501.294	#NULL!	#NULL!	-191.718	-61.1102	16.2647	-9.09014	#NULL!	#NULL!	448.86	-216.676	538.935	-687.725	#NULL!	#NULL!	-151.4	-494.923	118.806	602.136	#NULL!	#NULL!	-551.378	102.979	333.105	-111.936	#NULL!	#NULL!	-386.793	-406.85	-329.519	-594.06	#NULL!	#NULL!	705.761	-590.283	124.648	-483.3	#NULL!	#NULL!	#NULL!	#NULL!	-268.94	-311.592	#NULL!	#NULL!	-92.3268	42.6945
196.168	-183.903	180.916	-501.275	#NULL!	#NULL!	-196.02	-61.093	11.3519	-7.90293	#NULL!	#NULL!	376.783	-216.248	534.006	-687.698	#NULL!	#NULL!	-253.67	-495.49	112.66	604.519	#NULL!	#NULL!	-677.482	103.355	311.175	-111.893	#NULL!	#NULL!	-390.529	-405.825	-333.264	-594.052	#NULL!	#NULL!	700.831	-589.114	120.955	-483.3	#NULL!	#NULL!	#NULL!	#NULL!	-273.864	-311.592	#NULL!	#NULL!	-96.0318	45.0383
191.251	-183.883	152.625	-502.329	#NULL!	#NULL!	-201.556	-62.2366	6.43288	-7.8832	#NULL!	#NULL!	370.006	-216.208	530.31	-687.678	#NULL!	#NULL!	-257.36	-494.294	121.3	606.822	#NULL!	#NULL!	-515.022	107.944	306.895	-111.884	#NULL!	#NULL!	-398.549	-406.815	-335.942	-595.062	#NULL!	#NULL!	695.898	-589.104	103.72	-484.46	#NULL!	#NULL!	#NULL!	#NULL!	-278.788	-311.592	#NULL!	#NULL!	-100.983	46.232
186.335	-183.863	176.009	-498.92	#NULL!	#NULL!	-205.243	-62.2219	1.51388	-7.86348	#NULL!	#NULL!	364.462	-216.175	513.061	-687.584	#NULL!	#NULL!	-267.216	-494.235	113.719	609.605	#NULL!	#NULL!	-513.941	110.985	315.464	-109.532	#NULL!	#NULL!	-313.046	-405.041	-356.264	-594.006	#NULL!	#NULL!	690.965	-589.095	140.653	-482.14	#NULL!	#NULL!	#NULL!	#NULL!	-283.711	-311.592	#NULL!	#NULL!	-105.512	48.968
181.418	-183.844	172.32	-498.905	#NULL!	#NULL!	-157.291	-58.528	-7.70923	-7.82649	#NULL!	#NULL!	510.477	-214.694	508.749	-687.56	#NULL!	#NULL!	-167.405	-492.479	120.713	611.524	#NULL!	#NULL!	-529.971	111.032	348.635	-107.905	#NULL!	#NULL!	-383.575	-403.816	-363.753	-593.992	#NULL!	#NULL!	686.031	-589.085	124.657	-478.272	#NULL!	#NULL!	#NULL!	#NULL!	-288.635	-311.592	#NULL!	#NULL!	-105.281	53.2157
176.502	-183.824	220.292	-496.762	#NULL!	#NULL!	-163.439	-58.892	-15.7026	-7.79444	#NULL!	#NULL!	359.546	-213.798	505.661	-688.718	#NULL!	#NULL!	-229.009	-492.114	126.272	613.844	#NULL!	#NULL!	-695.612	112.54	344.355	-107.896	#NULL!	#NULL!	-315.882	-401.65	-206.482	-591.934	#NULL!	#NULL!	682.332	-589.078	120.962	-479.819	#NULL!	#NULL!	#NULL!	#NULL!	-244.316	-309.272	#NULL!	#NULL!	-117.866	56.0082
296.959	-183.141	215.373	-496.743	#NULL!	#NULL!	-168.355	-58.8723	-20.6216	-7.77471	#NULL!	#NULL!	354.617	-213.768	489.651	-687.456	#NULL!	#NULL!	-151.375	-490.226	116.212	614.29	#NULL!	#NULL!	-534.237	113.074	340.076	-107.888	#NULL!	#NULL!	-395.326	-402.766	-211.833	-592.262	#NULL!	#NULL!	673.699	-588.675	169.591	-476.339	#NULL!	#NULL!	#NULL!	#NULL!	-293.144	-308.885	#NULL!	#NULL!	-115.776	60.243
292.048	-181.955	210.454	-496.723	#NULL!	#NULL!	-173.271	-58.8526	-47.6822	-8.83372	#NULL!	#NULL!	342.906	-214.873	484.723	-687.429	#NULL!	#NULL!	-266.576	-489.542	112.096	612.746	#NULL!	#NULL!	-573.765	116.236	335.797	-107.879	#NULL!	#NULL!	-402.807	-402.744	-216.112	-592.254	#NULL!	#NULL!	666.299	-589.047	127.127	-474.018	#NULL!	#NULL!	#NULL!	#NULL!	-266.469	-306.565	#NULL!	#NULL!	-120.734	60.2778
283.444	-181.921	206.15	-496.706	#NULL!	#NULL!	-181.874	-58.4295	-3.39278	-5.50877	#NULL!	#NULL!	329.975	-213.622	481.019	-688.584	#NULL!	#NULL!	-168.619	-488.95	130.599	616.17	#NULL!	#NULL!	-708.415	117.651	331.518	-107.871	#NULL!	#NULL!	-380.352	-399.767	-218.256	-593.265	#NULL!	#NULL!	661.366	-589.037	122.203	-474.018	#NULL!	#NULL!	#NULL!	#NULL!	-272.624	-306.952	#NULL!	#NULL!	-118.235	63.737
201.094	-181.591	185.859	-496.624	#NULL!	#NULL!	-149.907	-56.226	-25.5262	-5.03084	#NULL!	#NULL!	453.807	-213.183	455.153	-687.268	#NULL!	#NULL!	-180.94	-488.877	125.685	618.546	#NULL!	#NULL!	-716.964	117.677	329.374	-108.882	#NULL!	#NULL!	-287.902	-398.013	-302.231	-592.082	#NULL!	#NULL!	657.666	-589.03	107.432	-474.018	#NULL!	#NULL!	#NULL!	#NULL!	-277.548	-306.952	#NULL!	#NULL!	-121.953	63.7631
162.174	-181.046	180.94	-496.605	#NULL!	#NULL!	-188.625	-56.4596	-31.0621	-5.39782	#NULL!	#NULL!	443.956	-211.95	450.224	-687.242	#NULL!	#NULL!	-229.601	-487.413	115.828	618.6	#NULL!	#NULL!	-746.887	117.766	309.052	-107.826	#NULL!	#NULL!	-314.089	-398.95	-307.58	-592.072	#NULL!	#NULL!	572.57	-588.865	103.739	-474.018	#NULL!	#NULL!	#NULL!	#NULL!	-281.856	-306.952	#NULL!	#NULL!	-129.344	71.9275
287.141	-179.604	145.277	-496.462	#NULL!	#NULL!	-192.932	-57.6081	-35.3724	-6.54805	#NULL!	#NULL!	372.495	-211.526	573.448	-685.563	#NULL!	#NULL!	-151.357	-486.704	112.132	618.62	#NULL!	#NULL!	-750.623	118.791	304.773	-107.818	#NULL!	#NULL!	-377.133	-396.733	-289.92	-590.076	#NULL!	#NULL!	567.637	-588.855	165.291	-471.698	#NULL!	#NULL!	#NULL!	#NULL!	-286.167	-308.112	#NULL!	#NULL!	-134.288	74.28
196.187	-179.24	142.812	-497.619	#NULL!	#NULL!	-157.272	-53.865	-39.0617	-6.53325	#NULL!	#NULL!	367.566	-211.497	568.519	-685.536	#NULL!	#NULL!	-203.099	-485.222	130.628	620.869	#NULL!	#NULL!	-721.23	119.719	300.493	-107.809	#NULL!	#NULL!	-388.884	-395.683	-294.199	-590.067	#NULL!	#NULL!	562.703	-588.845	119.13	-471.698	#NULL!	#NULL!	#NULL!	#NULL!	-243.692	-304.631	#NULL!	#NULL!	-130.557	76.5717
191.271	-179.22	176.034	-494.25	#NULL!	#NULL!	-163.419	-54.229	-51.353	-5.31645	#NULL!	#NULL!	362.638	-211.467	563.591	-685.509	#NULL!	#NULL!	-263.471	-484.864	120.771	620.922	#NULL!	#NULL!	-581.221	122.346	296.214	-107.801	#NULL!	#NULL!	-393.159	-395.671	-298.482	-591.074	#NULL!	#NULL!	552.837	-588.826	123.443	-469.377	#NULL!	#NULL!	#NULL!	#NULL!	-291.084	-304.631	#NULL!	#NULL!	-134.673	79.3048
186.355	-179.2	171.729	-494.233	#NULL!	#NULL!	-167.721	-54.2118	11.3765	-3.23296	#NULL!	#NULL!	505.573	-209.968	468.72	-684.993	#NULL!	#NULL!	-267.168	-484.842	126.33	623.242	#NULL!	#NULL!	-552.867	130.378	326.177	-105.829	#NULL!	#NULL!	-385.135	-393.665	-330.572	-589.995	#NULL!	#NULL!	547.904	-588.817	107.44	-469.377	#NULL!	#NULL!	#NULL!	#NULL!	-294.777	-304.631	#NULL!	#NULL!	-134.242	82.3922
181.438	-179.181	220.317	-492.092	#NULL!	#NULL!	-175.71	-54.1798	6.45754	-3.21324	#NULL!	#NULL!	500.644	-209.938	463.792	-684.966	#NULL!	#NULL!	-228.961	-482.72	116.474	623.295	#NULL!	#NULL!	-558.749	129.381	321.898	-105.82	#NULL!	#NULL!	-377.112	-391.66	-333.786	-591.004	#NULL!	#NULL!	540.916	-588.417	103.745	-470.538	#NULL!	#NULL!	#NULL!	#NULL!	-263.999	-302.311	#NULL!	#NULL!	-141.678	82.4444
176.522	-179.161	215.398	-492.073	#NULL!	#NULL!	-180.626	-54.1601	1.53854	-3.19351	#NULL!	#NULL!	496.942	-211.091	460.088	-686.12	#NULL!	#NULL!	-202.458	-480.529	130.657	625.568	#NULL!	#NULL!	-563.015	131.423	317.619	-105.812	#NULL!	#NULL!	-390.47	-391.62	-356.247	-589.944	#NULL!	#NULL!	649.039	-586.309	160.376	-467.057	#NULL!	#NULL!	#NULL!	#NULL!	-268.923	-302.311	#NULL!	#NULL!	-141.643	88.6251
172.22	-179.144	210.479	-492.053	#NULL!	#NULL!	-184.928	-54.1429	-8.29945	-3.15406	#NULL!	#NULL!	491.404	-209.884	447.159	-684.875	#NULL!	#NULL!	-263.447	-480.167	120.801	625.621	#NULL!	#NULL!	-747.358	132.987	314.409	-105.806	#NULL!	#NULL!	-385.657	-390.62	-361.061	-589.934	#NULL!	#NULL!	642.871	-586.683	157.912	-468.217	#NULL!	#NULL!	#NULL!	#NULL!	-273.846	-302.311	#NULL!	#NULL!	-146.583	91.7503
290.838	-177.287	205.56	-492.033	#NULL!	#NULL!	-140.054	-51.6024	-12.6036	-3.1368	#NULL!	#NULL!	448.897	-209.631	593.178	-682.929	#NULL!	#NULL!	-267.143	-480.145	125.744	627.944	#NULL!	#NULL!	-751.632	132.999	293.013	-105.763	#NULL!	#NULL!	-378.163	-387.598	-363.74	-590.945	#NULL!	#NULL!	637.938	-586.674	147.246	-466.67	#NULL!	#NULL!	#NULL!	#NULL!	-278.77	-302.311	#NULL!	#NULL!	-153.948	104.55
283.056	-176.867	185.884	-491.954	#NULL!	#NULL!	-146.202	-51.9664	-18.1436	-4.2821	#NULL!	#NULL!	358.338	-209.094	587.015	-683.287	#NULL!	#NULL!	-230.168	-478.016	115.887	627.998	#NULL!	#NULL!	-756.446	131.999	339.019	-104.839	#NULL!	#NULL!	-308.156	-385.777	-203.792	-588.216	#NULL!	#NULL!	633.005	-586.664	135.754	-468.217	#NULL!	#NULL!	#NULL!	#NULL!	-282.465	-303.471	#NULL!	#NULL!	-153.922	109.186
199.885	-176.923	180.965	-491.935	#NULL!	#NULL!	-151.118	-51.9467	-3.36607	-0.449642	#NULL!	#NULL!	326.303	-208.903	582.087	-683.26	#NULL!	#NULL!	-200.592	-477.018	130.687	630.267	#NULL!	#NULL!	-759.652	132.008	334.74	-104.83	#NULL!	#NULL!	-388.842	-385.537	-208.611	-589.222	#NULL!	#NULL!	629.305	-586.657	118.523	-467.057	#NULL!	#NULL!	#NULL!	#NULL!	-239.375	-299.991	#NULL!	#NULL!	-159.264	114.245
166.7	-176.401	144.066	-492.954	#NULL!	#NULL!	-157.252	-49.202	-26.7395	-1.9126	#NULL!	#NULL!	442.75	-206.855	577.159	-683.234	#NULL!	#NULL!	-263.423	-475.47	120.83	630.321	#NULL!	#NULL!	-764.995	132.024	329.395	-103.804	#NULL!	#NULL!	-391.505	-383.5	-212.885	-588.197	#NULL!	#NULL!	557.776	-586.132	154.225	-464.737	#NULL!	#NULL!	#NULL!	#NULL!	-263.99	-297.67	#NULL!	#NULL!	-157.587	118.483
161.168	-176.768	202.498	-489.686	#NULL!	#NULL!	-163.399	-49.566	-51.3283	-0.646484	#NULL!	#NULL!	367.591	-206.8	558.68	-682.741	#NULL!	#NULL!	-267.119	-475.448	125.773	632.643	#NULL!	#NULL!	-781.555	133.088	309.069	-103.764	#NULL!	#NULL!	-307.604	-381.382	-216.099	-589.207	#NULL!	#NULL!	698.374	-584.474	149.306	-462.03	#NULL!	#NULL!	#NULL!	#NULL!	-268.914	-297.67	#NULL!	#NULL!	-161.312	117.35
193.749	-174.567	174.828	-489.575	#NULL!	#NULL!	-167.701	-49.5488	12.6309	1.43207	#NULL!	#NULL!	363.278	-206.774	554.974	-684.288	#NULL!	#NULL!	-231.382	-474.486	115.916	632.697	#NULL!	#NULL!	-785.3	132.085	304.79	-103.755	#NULL!	#NULL!	-310.815	-382.726	-302.753	-589.035	#NULL!	#NULL!	693.441	-584.464	145.611	-463.577	#NULL!	#NULL!	#NULL!	#NULL!	-273.838	-297.67	#NULL!	#NULL!	-161.279	123.144
188.833	-174.547	169.909	-489.555	#NULL!	#NULL!	-135.118	-46.9591	7.71194	1.45179	#NULL!	#NULL!	499.431	-206.409	546.973	-683.069	#NULL!	#NULL!	-262.782	-470.777	129.484	634.972	#NULL!	#NULL!	-768.193	134.063	300.51	-103.747	#NULL!	#NULL!	-374.932	-381.52	-305.962	-589.028	#NULL!	#NULL!	688.508	-584.455	135.763	-463.577	#NULL!	#NULL!	#NULL!	#NULL!	-278.146	-297.67	#NULL!	#NULL!	-166.817	130.137
183.916	-174.528	222.801	-487.432	#NULL!	#NULL!	-141.265	-47.3231	2.79295	1.47152	#NULL!	#NULL!	493.892	-205.202	535.268	-683.005	#NULL!	#NULL!	-225.179	-466.304	120.862	635.411	#NULL!	#NULL!	-603.608	135.602	296.231	-103.738	#NULL!	#NULL!	-386.692	-382.5	-351.601	-587.583	#NULL!	#NULL!	683.574	-584.445	120.994	-462.416	#NULL!	#NULL!	#NULL!	#NULL!	-235.059	-295.35	#NULL!	#NULL!	-166.178	133.609
179.614	-174.51	217.882	-487.413	#NULL!	#NULL!	-146.182	-47.3034	-8.88967	1.51837	#NULL!	#NULL!	487.116	-205.161	530.339	-682.979	#NULL!	#NULL!	-262.142	-466.084	125.809	638.517	#NULL!	#NULL!	-608.951	135.618	324.413	-101.424	#NULL!	#NULL!	-381.87	-379.47	-289.901	-585.675	#NULL!	#NULL!	678.641	-584.435	106.227	-460.096	#NULL!	#NULL!	#NULL!	#NULL!	-266.443	-292.643	#NULL!	#NULL!	-173.575	140.615
172.854	-174.483	212.963	-487.393	#NULL!	#NULL!	-151.098	-47.2837	18.792	3.7424	#NULL!	#NULL!	435.984	-204.858	526.643	-682.958	#NULL!	#NULL!	-261.501	-461.391	118.852	642.471	#NULL!	#NULL!	-763.905	137.094	316.566	-101.747	#NULL!	#NULL!	-305.451	-377.668	-294.717	-586.004	#NULL!	#NULL!	673.708	-584.426	124.695	-457.776	#NULL!	#NULL!	#NULL!	#NULL!	-271.983	-293.029	#NULL!	#NULL!	-179.7	153.406
285.942	-172.605	208.044	-487.373	#NULL!	#NULL!	-127.734	-44.6572	-3.34142	4.22032	#NULL!	#NULL!	346.041	-204.324	510.619	-684.046	#NULL!	#NULL!	-188.18	-459.478	129.542	644.37	#NULL!	#NULL!	-789.558	136.156	312.287	-101.739	#NULL!	#NULL!	-308.661	-378.673	-330.559	-586.948	#NULL!	#NULL!	668.775	-584.416	121.002	-457.776	#NULL!	#NULL!	#NULL!	#NULL!	-275.062	-294.19	#NULL!	#NULL!	-183.418	153.432
281.025	-172.585	183.449	-487.275	#NULL!	#NULL!	-156.005	-44.9326	36.0147	4.84085	#NULL!	#NULL!	322.015	-204.181	488.448	-682.75	#NULL!	#NULL!	-260.448	-456.309	124.614	644.397	#NULL!	#NULL!	-629.205	147.854	291.962	-101.36	#NULL!	#NULL!	-373.846	-377.465	-359.44	-585.875	#NULL!	#NULL!	663.842	-584.407	102.542	-455.455	#NULL!	#NULL!	#NULL!	#NULL!	-259.054	-290.709	#NULL!	#NULL!	-179.674	158.042
276.723	-172.568	179.145	-487.257	#NULL!	#NULL!	-160.926	-46.0786	23.7233	6.05765	#NULL!	#NULL!	440.308	-202.535	484.745	-683.905	#NULL!	#NULL!	-126.551	-455.147	118.881	647.17	#NULL!	#NULL!	-771.339	148.277	286.612	-101.688	#NULL!	#NULL!	-381.853	-375.412	-203.24	-584.154	#NULL!	#NULL!	658.909	-584.397	124.704	-452.748	#NULL!	#NULL!	#NULL!	#NULL!	-263.973	-288.389	#NULL!	#NULL!	-184.011	158.072
197.446	-172.25	147.171	-487.129	#NULL!	#NULL!	-165.843	-46.0589	13.8854	6.0971	#NULL!	#NULL!	362.687	-202.074	451.486	-682.549	#NULL!	#NULL!	-261.453	-451.998	117.882	651.483	#NULL!	#NULL!	-621.668	161.36	282.332	-101.679	#NULL!	#NULL!	-277.114	-373.694	-211.799	-584.137	#NULL!	#NULL!	570.114	-583.838	119.78	-453.135	#NULL!	#NULL!	#NULL!	#NULL!	-268.897	-288.389	#NULL!	#NULL!	-179.648	162.677
166.72	-171.738	203.549	-484.631	#NULL!	#NULL!	-135.1	-42.6847	8.96635	6.11683	#NULL!	#NULL!	332.5	-201.895	572.245	-680.857	#NULL!	#NULL!	-252.2	-449.704	117.911	656.182	#NULL!	#NULL!	-649.459	160.09	280.188	-102.691	#NULL!	#NULL!	-369.555	-373.419	-283.474	-583.656	#NULL!	#NULL!	563.946	-584.212	98.8537	-453.135	#NULL!	#NULL!	#NULL!	#NULL!	-259.045	-286.068	#NULL!	#NULL!	-184.611	161.553
160.573	-172.102	173.625	-484.511	#NULL!	#NULL!	-140.017	-42.6651	4.04735	6.13655	#NULL!	#NULL!	490.83	-201.661	564.852	-680.817	#NULL!	#NULL!	-262.05	-448.472	135.805	660.784	#NULL!	#NULL!	-592.794	166.009	306.942	-100.713	#NULL!	#NULL!	-380.231	-371.02	-324.126	-583.576	#NULL!	#NULL!	550.381	-583.799	151.793	-448.494	#NULL!	#NULL!	#NULL!	#NULL!	-272.586	-286.068	#NULL!	#NULL!	-189.569	161.588
191.31	-169.894	168.089	-484.878	#NULL!	#NULL!	-144.319	-42.6478	28.6485	7.20542	#NULL!	#NULL!	483.438	-201.617	467.52	-679.895	#NULL!	#NULL!	-178.256	-446.621	130.877	660.81	#NULL!	#NULL!	-645.1	180.369	302.667	-99.6885	#NULL!	#NULL!	-383.443	-372.363	-328.407	-583.905	#NULL!	#NULL!	544.214	-584.174	147.485	-448.494	#NULL!	#NULL!	#NULL!	#NULL!	-233.191	-283.748	#NULL!	#NULL!	-188.695	170.08
186.394	-169.874	224.055	-482.767	#NULL!	#NULL!	-149.854	-43.7914	18.8167	8.41236	#NULL!	#NULL!	432.922	-201.317	461.973	-680.257	#NULL!	#NULL!	-252.175	-445.008	126.565	660.834	#NULL!	#NULL!	-648.306	180.379	298.388	-99.68	#NULL!	#NULL!	-278.7	-369.631	-348.733	-583.865	#NULL!	#NULL!	539.898	-584.165	125.943	-448.494	#NULL!	#NULL!	#NULL!	#NULL!	-263.965	-283.748	#NULL!	#NULL!	-187.025	173.159
181.477	-169.855	219.136	-482.748	#NULL!	#NULL!	-115.423	-40.0434	-0.859315	8.49126	#NULL!	#NULL!	427.994	-201.288	598.136	-678.257	#NULL!	#NULL!	-153.596	-443.245	121.02	660.864	#NULL!	#NULL!	-655.231	185.473	276.992	-99.6375	#NULL!	#NULL!	-366.336	-370.385	-290.955	-581.949	#NULL!	#NULL!	710.711	-582.18	121.019	-448.494	#NULL!	#NULL!	#NULL!	#NULL!	-268.888	-283.748	#NULL!	#NULL!	-191.356	174.349
282.269	-169.093	214.217	-482.728	#NULL!	#NULL!	-121.57	-40.4074	-5.78448	7.34349	#NULL!	#NULL!	356.532	-200.863	592.589	-678.619	#NULL!	#NULL!	-217.665	-442.864	116.708	660.888	#NULL!	#NULL!	-660.04	185.487	328.351	-97.7082	#NULL!	#NULL!	-276.554	-367.608	-294.169	-582.958	#NULL!	#NULL!	653.981	-581.683	118.555	-449.654	#NULL!	#NULL!	#NULL!	#NULL!	-259.036	-281.428	#NULL!	#NULL!	-196.92	176.705
278.582	-169.078	209.298	-482.708	#NULL!	#NULL!	-126.487	-40.3877	23.748	10.7276	#NULL!	#NULL!	351.61	-199.66	588.269	-679.77	#NULL!	#NULL!	-262.02	-442.601	141.988	664.274	#NULL!	#NULL!	-697.97	187.629	324.072	-97.6997	#NULL!	#NULL!	-362.048	-367.354	-357.818	-581.816	#NULL!	#NULL!	647.814	-582.058	98.8644	-447.334	#NULL!	#NULL!	#NULL!	#NULL!	-273.807	-281.041	#NULL!	#NULL!	-201.884	175.581
195.007	-167.577	185.933	-482.615	#NULL!	#NULL!	-131.403	-40.368	13.91	10.7671	#NULL!	#NULL!	345.443	-200.797	583.348	-678.568	#NULL!	#NULL!	-252.151	-440.311	130.899	664.335	#NULL!	#NULL!	-656.821	188.521	295.187	-97.6424	#NULL!	#NULL!	-300.591	-365.507	-201.084	-580.096	#NULL!	#NULL!	643.498	-582.049	151.186	-443.853	#NULL!	#NULL!	#NULL!	#NULL!	-263.341	-279.107	#NULL!	#NULL!	-205.602	175.607
176.573	-167.115	181.014	-482.595	#NULL!	#NULL!	-137.127	-37.625	8.99101	10.7868	#NULL!	#NULL!	317.105	-200.629	558.707	-678.434	#NULL!	#NULL!	-217.646	-439.342	126.594	665.533	#NULL!	#NULL!	-661.092	189.548	288.768	-97.6296	#NULL!	#NULL!	-379.85	-364.933	-209.642	-580.079	#NULL!	#NULL!	636.715	-582.036	148.107	-445.014	#NULL!	#NULL!	#NULL!	#NULL!	-279.343	-279.107	#NULL!	#NULL!	-191.95	178.988
166.74	-167.076	146.581	-482.457	#NULL!	#NULL!	-141.231	-39.1629	4.07201	10.8065	#NULL!	#NULL!	479.754	-199.246	553.778	-678.407	#NULL!	#NULL!	-261.995	-437.904	121.049	665.563	#NULL!	#NULL!	-699.56	190.678	284.489	-97.6211	#NULL!	#NULL!	-362.566	-363.294	-280.249	-579.939	#NULL!	#NULL!	631.782	-582.026	124.721	-443.853	#NULL!	#NULL!	#NULL!	#NULL!	-228.256	-277.947	#NULL!	#NULL!	-196.881	183.659
160.593	-167.44	203.164	-479.959	#NULL!	#NULL!	-110.487	-35.4001	18.8434	13.4715	#NULL!	#NULL!	439.101	-197.831	547.002	-678.37	#NULL!	#NULL!	-249.662	-435.629	128.464	669.047	#NULL!	#NULL!	-663.216	192.599	280.21	-97.6126	#NULL!	#NULL!	-371.115	-363.268	-321.971	-579.856	#NULL!	#NULL!	620.065	-582.004	119.797	-443.853	#NULL!	#NULL!	#NULL!	#NULL!	-259.028	-276.787	#NULL!	#NULL!	-203.077	183.702
156.905	-167.425	199.466	-481.501	#NULL!	#NULL!	-116.634	-35.7641	1.00997	13.1538	#NULL!	#NULL!	436.63	-198.99	534.065	-678.3	#NULL!	#NULL!	-261.971	-433.207	122.927	670.252	#NULL!	#NULL!	-701.68	194.742	299.475	-95.6196	#NULL!	#NULL!	-299.505	-361.452	-328.032	-579.505	#NULL!	#NULL!	557.785	-581.882	135.806	-440.373	#NULL!	#NULL!	#NULL!	#NULL!	-268.875	-276.787	#NULL!	#NULL!	-205.563	182.561
189.486	-165.224	176.107	-480.24	#NULL!	#NULL!	-121.55	-35.7444	11.4752	15.4469	#NULL!	#NULL!	421.851	-197.728	529.137	-678.273	#NULL!	#NULL!	-245.529	-430.565	144.51	673.659	#NULL!	#NULL!	-662.131	196.654	277.009	-95.575	#NULL!	#NULL!	-367.366	-361.25	-350.856	-579.798	#NULL!	#NULL!	705.781	-581.011	119.803	-440.373	#NULL!	#NULL!	#NULL!	#NULL!	-273.799	-276.787	#NULL!	#NULL!	-196.235	188.29
182.726	-165.197	171.188	-480.22	#NULL!	#NULL!	-126.467	-35.7247	6.55617	15.4666	#NULL!	#NULL!	312.195	-197.077	524.208	-678.246	#NULL!	#NULL!	-249.644	-432.106	122.956	674.951	#NULL!	#NULL!	-665.337	196.663	294.136	-93.2392	#NULL!	#NULL!	-378.052	-360.88	-290.938	-577.886	#NULL!	#NULL!	700.847	-581.002	149.353	-436.892	#NULL!	#NULL!	#NULL!	#NULL!	-263.947	-274.466	#NULL!	#NULL!	-202.432	188.333
270.414	-162.828	167.499	-480.205	#NULL!	#NULL!	-130.159	-36.8757	31.1655	18.0921	#NULL!	#NULL!	487.159	-196.942	449.044	-679.012	#NULL!	#NULL!	-168.296	-426.718	121.137	679.66	#NULL!	#NULL!	-668.53	199.717	288.785	-93.5671	#NULL!	#NULL!	-381.263	-362.224	-336.405	-577.796	#NULL!	#NULL!	694.683	-579.831	98.8816	-438.053	#NULL!	#NULL!	#NULL!	#NULL!	-259.019	-272.146	#NULL!	#NULL!	-199.927	192.952
193.793	-164.075	143.519	-480.109	#NULL!	#NULL!	-100.636	-31.1651	25.0147	17.7276	#NULL!	#NULL!	473.611	-195.687	573.506	-676.165	#NULL!	#NULL!	-245.917	-426.257	149.505	684.205	#NULL!	#NULL!	-713.406	201.88	284.506	-93.5587	#NULL!	#NULL!	-363.082	-358.896	-356.196	-577.756	#NULL!	#NULL!	689.75	-579.821	145.664	-434.572	#NULL!	#NULL!	#NULL!	#NULL!	-268.252	-272.146	#NULL!	#NULL!	-205.51	191.832
177.205	-162.843	220.391	-478.083	#NULL!	#NULL!	-105.552	-31.1454	20.0957	17.7474	#NULL!	#NULL!	432.946	-196.62	563.642	-677.286	#NULL!	#NULL!	-119.819	-424.266	123.015	684.349	#NULL!	#NULL!	-719.818	201.899	280.227	-93.5502	#NULL!	#NULL!	-371.637	-360.223	-198.927	-576.038	#NULL!	#NULL!	684.817	-579.812	116.737	-434.572	#NULL!	#NULL!	#NULL!	#NULL!	-254.091	-269.826	#NULL!	#NULL!	-209.215	194.176
171.674	-162.821	215.472	-478.063	#NULL!	#NULL!	-110.469	-31.1257	15.1767	17.7671	#NULL!	#NULL!	347.932	-196.115	520.527	-675.876	#NULL!	#NULL!	-250.832	-423.488	149.527	687.729	#NULL!	#NULL!	-716.599	204.933	262.763	-91.1457	#NULL!	#NULL!	-297.889	-358.413	-208.02	-576.02	#NULL!	#NULL!	679.884	-579.802	149.361	-432.252	#NULL!	#NULL!	#NULL!	#NULL!	-263.939	-269.826	#NULL!	#NULL!	-214.166	195.369
166.758	-162.801	210.553	-478.043	#NULL!	#NULL!	-115.385	-31.106	33.6497	22.7522	#NULL!	#NULL!	325.754	-195.984	477.404	-675.642	#NULL!	#NULL!	-254.536	-425.032	123.044	689.048	#NULL!	#NULL!	-724.08	204.955	295.221	-89.5174	#NULL!	#NULL!	-374.83	-357.17	-224.602	-575.987	#NULL!	#NULL!	674.951	-579.793	119.823	-429.931	#NULL!	#NULL!	#NULL!	#NULL!	-259.011	-267.505	#NULL!	#NULL!	-217.871	197.713
161.841	-162.781	185.958	-477.945	#NULL!	#NULL!	-120.307	-32.2521	27.4989	22.3877	#NULL!	#NULL!	483.474	-194.572	472.475	-675.615	#NULL!	#NULL!	-215.091	-421.744	131.067	691.354	#NULL!	#NULL!	-728.885	205.984	290.942	-89.5089	#NULL!	#NULL!	-380.173	-357.154	-281.302	-575.874	#NULL!	#NULL!	670.018	-579.783	114.899	-429.931	#NULL!	#NULL!	#NULL!	#NULL!	-268.243	-267.505	#NULL!	#NULL!	-201.127	199.913
156.925	-162.762	181.039	-477.925	#NULL!	#NULL!	-125.223	-32.2324	22.5799	22.4075	#NULL!	#NULL!	428.036	-193.068	467.539	-676.763	#NULL!	#NULL!	-117.127	-419.977	126.755	691.377	#NULL!	#NULL!	-731.561	204.977	286.663	-89.5004	#NULL!	#NULL!	-362.532	-355.177	-321.954	-575.793	#NULL!	#NULL!	665.085	-579.773	150.599	-428.771	#NULL!	#NULL!	#NULL!	#NULL!	-254.083	-265.185	#NULL!	#NULL!	-215.379	200.013
181.928	-160.142	205.648	-475.299	#NULL!	#NULL!	-85.8671	-26.5612	17.6609	22.4272	#NULL!	#NULL!	419.412	-193.017	462.618	-675.561	#NULL!	#NULL!	-250.809	-419.183	121.225	693.757	#NULL!	#NULL!	-678.114	207.862	283.449	-90.5097	#NULL!	#NULL!	-366.272	-355.166	-327.303	-575.783	#NULL!	#NULL!	660.152	-579.764	103.823	-428.771	#NULL!	#NULL!	#NULL!	#NULL!	-263.93	-265.185	#NULL!	#NULL!	-215.973	204.653
271.251	-158.556	199.497	-475.664	#NULL!	#NULL!	-90.7835	-26.5415	13.9655	21.2745	#NULL!	#NULL!	344.254	-192.571	457.69	-675.534	#NULL!	#NULL!	-254.512	-420.335	131.713	696.05	#NULL!	#NULL!	-720.865	206.975	280.24	-90.5033	#NULL!	#NULL!	-272.22	-353.416	-329.447	-576.794	#NULL!	#NULL!	572.589	-579.593	119.831	-425.291	#NULL!	#NULL!	#NULL!	#NULL!	-259.002	-262.865	#NULL!	#NULL!	-202.314	209.193
267.564	-158.542	197.032	-476.821	#NULL!	#NULL!	-95.6999	-26.5218	36.1318	27.0232	#NULL!	#NULL!	322.07	-193.613	603.094	-673.585	#NULL!	#NULL!	-213.834	-417.054	124.936	696.087	#NULL!	#NULL!	-685.561	216.001	254.213	-89.0974	#NULL!	#NULL!	-293.059	-353.354	-352.978	-575.732	#NULL!	#NULL!	567.656	-579.584	114.907	-425.291	#NULL!	#NULL!	#NULL!	#NULL!	-267.621	-264.025	#NULL!	#NULL!	-220.904	209.324
165.548	-158.133	176.134	-475.181	#NULL!	#NULL!	-100.616	-26.5021	31.2128	27.0429	#NULL!	#NULL!	309.755	-192.366	596.931	-673.943	#NULL!	#NULL!	-217.536	-418.207	126.197	700.779	#NULL!	#NULL!	-680.205	219.029	264.205	-87.4246	#NULL!	#NULL!	-378.019	-353.101	-286.642	-573.832	#NULL!	#NULL!	562.723	-579.574	103.831	-424.13	#NULL!	#NULL!	#NULL!	#NULL!	-254.074	-260.544	#NULL!	#NULL!	-207.258	211.546
160.632	-158.114	170.598	-475.548	#NULL!	#NULL!	-105.533	-26.4824	26.2938	27.0626	#NULL!	#NULL!	479.79	-192.201	592.002	-673.916	#NULL!	#NULL!	-150.991	-416.253	122.501	700.799	#NULL!	#NULL!	-742.188	219.214	259.926	-87.4161	#NULL!	#NULL!	-381.229	-354.107	-336.923	-573.732	#NULL!	#NULL!	553.473	-579.556	119.84	-420.65	#NULL!	#NULL!	#NULL!	#NULL!	-262.691	-260.544	#NULL!	#NULL!	-201.668	213.824
155.715	-158.094	167.518	-476.703	#NULL!	#NULL!	-110.454	-27.6285	21.3748	27.0824	#NULL!	#NULL!	474.862	-192.172	583.378	-673.869	#NULL!	#NULL!	-251.401	-414.483	145.31	703.024	#NULL!	#NULL!	-683.402	221.068	292.029	-85.4486	#NULL!	#NULL!	-360.377	-351.125	-340.132	-573.726	#NULL!	#NULL!	549.154	-580.707	114.916	-420.65	#NULL!	#NULL!	#NULL!	#NULL!	-258.994	-258.224	#NULL!	#NULL!	-219.026	212.787
150.799	-158.074	142.929	-475.437	#NULL!	#NULL!	-80.9392	-23.8608	16.4558	27.1021	#NULL!	#NULL!	468.708	-190.961	558.736	-673.735	#NULL!	#NULL!	-205.801	-412.405	141.425	705.787	#NULL!	#NULL!	-686.609	221.078	287.749	-85.4401	#NULL!	#NULL!	-365.187	-351.111	-356.714	-573.693	#NULL!	#NULL!	540.524	-579.145	132.154	-418.329	#NULL!	#NULL!	#NULL!	#NULL!	-224.112	-255.517	#NULL!	#NULL!	-222.744	212.813
147.112	-158.06	217.956	-473.403	#NULL!	#NULL!	-48.3597	-22.0483	36.1564	31.6931	#NULL!	#NULL!	422.516	-188.339	555.04	-673.715	#NULL!	#NULL!	-211.352	-413.546	127.459	705.471	#NULL!	#NULL!	-694.085	222.115	284.536	-86.4493	#NULL!	#NULL!	-271.134	-349.361	-198.91	-571.975	#NULL!	#NULL!	653.991	-577.048	103.842	-418.329	#NULL!	#NULL!	#NULL!	#NULL!	-254.065	-255.904	#NULL!	#NULL!	-204.754	216.164
118.837	-159.112	213.037	-473.383	#NULL!	#NULL!	-61.2636	-21.608	31.2374	31.7129	#NULL!	#NULL!	416.356	-188.302	545.183	-673.661	#NULL!	#NULL!	-250.758	-409.398	123.147	705.495	#NULL!	#NULL!	-699.428	222.131	255.657	-85.0378	#NULL!	#NULL!	-368.918	-349.07	-206.399	-571.96	#NULL!	#NULL!	647.824	-577.422	127.85	-416.009	#NULL!	#NULL!	#NULL!	#NULL!	-258.984	-253.196	#NULL!	#NULL!	-209.085	217.353
183.99	-157.041	193.361	-473.304	#NULL!	#NULL!	-67.4108	-21.972	26.3184	31.7326	#NULL!	#NULL!	343.046	-187.867	541.487	-673.641	#NULL!	#NULL!	-254.463	-410.942	140.425	710.1	#NULL!	#NULL!	-694.068	226.173	252.442	-86.3856	#NULL!	#NULL!	-375.151	-348.713	-280.75	-571.813	#NULL!	#NULL!	642.891	-577.412	119.849	-415.622	#NULL!	#NULL!	#NULL!	#NULL!	-263.909	-253.583	#NULL!	#NULL!	-216.514	218.564
270.037	-155.054	188.436	-474.452	#NULL!	#NULL!	-73.5563	-21.9474	22.0143	31.7498	#NULL!	#NULL!	304.851	-187.64	531.63	-673.587	#NULL!	#NULL!	-205.161	-407.712	126.256	710.177	#NULL!	#NULL!	-700.48	226.192	292.046	-81.3861	#NULL!	#NULL!	-379.075	-350.055	-320.332	-571.734	#NULL!	#NULL!	637.957	-577.403	113.694	-416.009	#NULL!	#NULL!	#NULL!	#NULL!	-220.821	-251.263	#NULL!	#NULL!	-205.354	219.645
265.121	-155.035	183.523	-473.265	#NULL!	#NULL!	-88.3056	-21.8884	16.4743	30.6045	#NULL!	#NULL!	467.494	-187.432	526.702	-673.561	#NULL!	#NULL!	-249.504	-405.1	139.222	714.805	#NULL!	#NULL!	-746.433	226.329	287.766	-81.3776	#NULL!	#NULL!	-357.154	-347.076	-327.821	-571.719	#NULL!	#NULL!	633.024	-577.393	130.931	-413.689	#NULL!	#NULL!	#NULL!	#NULL!	-223.285	-252.423	#NULL!	#NULL!	-211.531	223.165
163.105	-154.626	208.13	-471.028	#NULL!	#NULL!	-92.6075	-21.8711	38.6427	36.7424	#NULL!	#NULL!	463.188	-186.232	574.768	-671.473	#NULL!	#NULL!	-253.206	-406.253	126.698	715.265	#NULL!	#NULL!	-697.261	229.226	284.022	-81.3701	#NULL!	#NULL!	-271.116	-344.964	-351.892	-571.671	#NULL!	#NULL!	628.708	-577.385	107.544	-413.302	#NULL!	#NULL!	#NULL!	#NULL!	-251.594	-250.876	#NULL!	#NULL!	-216.488	223.2
145.897	-154.557	203.211	-471.009	#NULL!	#NULL!	-98.1385	-21.849	32.4918	36.3779	#NULL!	#NULL!	410.824	-185.921	569.839	-671.446	#NULL!	#NULL!	-203.904	-403.023	146.028	719.467	#NULL!	#NULL!	-702.601	230.257	255.672	-81.3138	#NULL!	#NULL!	-274.328	-346.308	-276.639	-569.451	#NULL!	#NULL!	619.458	-577.367	102.619	-413.689	#NULL!	#NULL!	#NULL!	#NULL!	-258.976	-248.942	#NULL!	#NULL!	-221.446	223.235
121.315	-154.459	198.292	-470.989	#NULL!	#NULL!	-103.06	-22.995	27.5728	36.3976	#NULL!	#NULL!	330.732	-186.619	567.368	-672.607	#NULL!	#NULL!	-208.217	-402.997	142.332	719.488	#NULL!	#NULL!	-747.485	230.39	251.393	-81.3053	#NULL!	#NULL!	-365.165	-346.037	-284.486	-569.774	#NULL!	#NULL!	558.206	-576.861	123.55	-411.368	#NULL!	#NULL!	#NULL!	#NULL!	-264.516	-248.942	#NULL!	#NULL!	-223.911	225.57
247.353	-142.14	178.618	-470.521	#NULL!	#NULL!	-53.8808	-19.6947	25.1072	35.24	#NULL!	#NULL!	457.649	-185.025	523.02	-671.191	#NULL!	#NULL!	-141.061	-402.222	136.171	719.521	#NULL!	#NULL!	-750.678	233.444	248.184	-81.299	#NULL!	#NULL!	-376.921	-346.002	-338.687	-569.328	#NULL!	#NULL!	690.993	-575.188	118.626	-411.368	#NULL!	#NULL!	#NULL!	#NULL!	-249.125	-246.622	#NULL!	#NULL!	-218.939	228.239
170.534	-141.833	172.468	-470.885	#NULL!	#NULL!	-78.4629	-19.5963	43.5863	41.3927	#NULL!	#NULL!	451.495	-183.814	474.971	-670.538	#NULL!	#NULL!	-164.465	-400.908	131.243	719.548	#NULL!	#NULL!	-707.923	235.346	290.993	-77.3215	#NULL!	#NULL!	-382.26	-344.972	-355.804	-569.294	#NULL!	#NULL!	687.293	-575.181	113.702	-411.368	#NULL!	#NULL!	#NULL!	#NULL!	-254.048	-246.622	#NULL!	#NULL!	-208.948	241.69
168.071	-142.988	170.002	-472.043	#NULL!	#NULL!	-83.3793	-19.5766	37.4355	41.0281	#NULL!	#NULL!	418.222	-184.791	471.265	-672.084	#NULL!	#NULL!	-240.855	-400.455	126.315	719.575	#NULL!	#NULL!	-712.197	235.358	286.714	-77.313	#NULL!	#NULL!	-354.47	-344.04	-198.893	-567.913	#NULL!	#NULL!	681.127	-575.169	139.557	-409.048	#NULL!	#NULL!	#NULL!	#NULL!	-257.739	-245.462	#NULL!	#NULL!	-228.738	248.782
163.154	-142.969	141.724	-470.762	#NULL!	#NULL!	-48.9529	-16.9943	32.5165	41.0479	#NULL!	#NULL!	341.833	-184.337	462.648	-670.862	#NULL!	#NULL!	-250.712	-400.396	144.825	724.173	#NULL!	#NULL!	-747.464	235.464	282.434	-77.3045	#NULL!	#NULL!	-361.951	-344.018	-207.451	-567.896	#NULL!	#NULL!	676.194	-575.159	105.09	-409.048	#NULL!	#NULL!	#NULL!	#NULL!	-249.115	-241.595	#NULL!	#NULL!	-234.922	251.143
145.134	-141.342	217.981	-468.733	#NULL!	#NULL!	-58.7858	-16.9549	27.5975	41.0676	#NULL!	#NULL!	301.796	-182.925	457.719	-670.835	#NULL!	#NULL!	-206.344	-398.311	136.203	724.612	#NULL!	#NULL!	-754.944	235.486	280.291	-78.3158	#NULL!	#NULL!	-369.427	-342.981	-318.711	-567.675	#NULL!	#NULL!	671.261	-575.15	135.866	-407.888	#NULL!	#NULL!	#NULL!	#NULL!	-252.811	-243.142	#NULL!	#NULL!	-237.407	250.002
251.665	-139.826	213.062	-468.713	#NULL!	#NULL!	-64.9329	-17.3189	23.9021	39.9149	#NULL!	#NULL!	446.579	-181.436	454.023	-670.815	#NULL!	#NULL!	-210.04	-398.289	130.04	724.254	#NULL!	#NULL!	-712.18	239.417	253.546	-78.2627	#NULL!	#NULL!	-266.824	-340.919	-326.734	-567.659	#NULL!	#NULL!	666.328	-575.14	118.635	-406.728	#NULL!	#NULL!	#NULL!	#NULL!	-217.107	-239.661	#NULL!	#NULL!	-235.72	256.171
155.794	-139.442	193.386	-468.634	#NULL!	#NULL!	-69.8493	-17.2992	46.0705	46.0528	#NULL!	#NULL!	441.65	-181.407	603.12	-669.278	#NULL!	#NULL!	-245.771	-398.077	125.728	724.277	#NULL!	#NULL!	-717.507	243.491	249.271	-77.2386	#NULL!	#NULL!	-271.635	-341.243	-349.733	-567.274	#NULL!	#NULL!	661.395	-575.13	114.94	-407.888	#NULL!	#NULL!	#NULL!	#NULL!	-238.649	-239.661	#NULL!	#NULL!	-234.869	260.415
150.878	-139.422	208.157	-465.969	#NULL!	#NULL!	-74.7658	-17.2795	41.1432	44.5158	#NULL!	#NULL!	412.08	-181.232	598.192	-669.251	#NULL!	#NULL!	-114.744	-396.115	146.087	728.866	#NULL!	#NULL!	-721.782	243.504	245.526	-77.2312	#NULL!	#NULL!	-274.311	-342.249	-273.771	-565.733	#NULL!	#NULL!	614.942	-574.654	140.181	-404.407	#NULL!	#NULL!	#NULL!	#NULL!	-244.184	-237.341	#NULL!	#NULL!	-239.827	260.449
245.53	-137.081	202.006	-466.334	#NULL!	#NULL!	-88.9005	-17.2229	35.0007	45.708	#NULL!	#NULL!	407.768	-181.206	593.88	-669.227	#NULL!	#NULL!	-240.83	-395.758	138.694	728.906	#NULL!	#NULL!	-766.666	243.638	277.094	-75.2626	#NULL!	#NULL!	-350.183	-341.009	-275.914	-566.744	#NULL!	#NULL!	605.895	-576.181	103.87	-403.247	#NULL!	#NULL!	#NULL!	#NULL!	-249.107	-237.341	#NULL!	#NULL!	-242.312	259.308
240.612	-137.45	197.087	-466.314	#NULL!	#NULL!	-91.9782	-18.3764	30.6965	45.7252	#NULL!	#NULL!	334.458	-180.771	589.56	-670.378	#NULL!	#NULL!	-141.019	-394.002	133.766	728.933	#NULL!	#NULL!	-769.859	246.691	272.815	-75.2541	#NULL!	#NULL!	-358.198	-340.985	-284.469	-565.712	#NULL!	#NULL!	575.065	-574.962	141.42	-399.767	#NULL!	#NULL!	#NULL!	#NULL!	-254.031	-237.341	#NULL!	#NULL!	-235.463	265.055
165.637	-137.15	181.1	-466.25	#NULL!	#NULL!	12.5056	-16.4632	51.0121	50.3138	#NULL!	#NULL!	297.496	-180.551	558.768	-668.644	#NULL!	#NULL!	-206.32	-393.615	125.141	728.98	#NULL!	#NULL!	-720.696	247.559	269.079	-73.2154	#NULL!	#NULL!	-373.159	-340.94	-336.893	-566.623	#NULL!	#NULL!	570.132	-574.953	116.186	-399.767	#NULL!	#NULL!	#NULL!	#NULL!	-258.955	-237.341	#NULL!	#NULL!	-241.04	265.094
161.95	-137.135	176.181	-466.23	#NULL!	#NULL!	-82.1355	-16.0843	46.0931	50.3336	#NULL!	#NULL!	303.668	-178.239	540.284	-668.935	#NULL!	#NULL!	-210.022	-394.767	146.94	733.952	#NULL!	#NULL!	-763.443	247.686	243.939	-73.1655	#NULL!	#NULL!	-377.973	-341.941	-354.541	-565.572	#NULL!	#NULL!	565.199	-574.943	137.732	-397.446	#NULL!	#NULL!	#NULL!	#NULL!	-217.098	-235.02	#NULL!	#NULL!	-236.057	269.694
144.744	-136.678	171.262	-466.21	#NULL!	#NULL!	-3.45796	-12.902	42.3976	49.1809	#NULL!	#NULL!	293.805	-179.355	535.356	-668.909	#NULL!	#NULL!	-245.131	-393.384	130.099	733.652	#NULL!	#NULL!	-766.641	249.725	241.795	-74.1769	#NULL!	#NULL!	-381.178	-341.931	-187.108	-563.874	#NULL!	#NULL!	543.001	-574.514	110.651	-397.446	#NULL!	#NULL!	#NULL!	#NULL!	-220.793	-236.18	#NULL!	#NULL!	-241.02	268.57
139.826	-137.047	167.573	-466.196	#NULL!	#NULL!	-9.60349	-12.8774	33.7894	49.2154	#NULL!	#NULL!	445.365	-177.906	530.427	-668.882	#NULL!	#NULL!	-113.907	-392.989	125.786	733.675	#NULL!	#NULL!	-776.789	250.77	277.107	-72.2158	#NULL!	#NULL!	-369.409	-338.584	-191.387	-563.865	#NULL!	#NULL!	536.833	-574.888	140.813	-395.126	#NULL!	#NULL!	#NULL!	#NULL!	-239.255	-235.02	#NULL!	#NULL!	-236.031	274.33
152.127	-134.764	140.519	-466.087	#NULL!	#NULL!	-13.2908	-12.8626	51.0367	54.9838	#NULL!	#NULL!	441.059	-176.707	525.499	-668.855	#NULL!	#NULL!	-240.393	-390.673	147.993	738.254	#NULL!	#NULL!	-780.533	249.767	272.832	-71.1916	#NULL!	#NULL!	-258.259	-337.224	-197.448	-563.514	#NULL!	#NULL!	534.365	-576.042	114.963	-395.126	#NULL!	#NULL!	#NULL!	#NULL!	-262.646	-236.18	#NULL!	#NULL!	-240.368	274.36
244.319	-132.802	220.465	-464.073	#NULL!	#NULL!	-41.5602	-12.7494	47.3413	53.8311	#NULL!	#NULL!	405.328	-176.495	467.593	-668.148	#NULL!	#NULL!	-140.994	-389.306	144.906	737.096	#NULL!	#NULL!	-731.896	252.666	264.273	-71.1746	#NULL!	#NULL!	-261.47	-338.229	-207.434	-563.833	#NULL!	#NULL!	656.467	-572.417	130.97	-392.805	#NULL!	#NULL!	#NULL!	#NULL!	-212.17	-232.7	#NULL!	#NULL!	-236.005	278.965
240.018	-132.785	215.546	-464.053	#NULL!	#NULL!	-46.4766	-12.7297	49.8316	59.6587	#NULL!	#NULL!	401.01	-177.643	571.103	-666.362	#NULL!	#NULL!	-205.063	-388.925	125.816	738.374	#NULL!	#NULL!	-778.379	253.819	259.994	-71.1661	#NULL!	#NULL!	-266.274	-337.2	-315.484	-563.619	#NULL!	#NULL!	650.3	-572.791	119.889	-393.966	#NULL!	#NULL!	#NULL!	#NULL!	-242.944	-232.7	#NULL!	#NULL!	-240.962	279
160.74	-132.467	192.18	-463.959	#NULL!	#NULL!	-51.3931	-12.7101	44.3101	62.0159	#NULL!	#NULL!	329.554	-176.045	564.94	-666.72	#NULL!	#NULL!	-238.317	-386.379	131.375	740.694	#NULL!	#NULL!	-782.65	254.846	238.594	-72.1393	#NULL!	#NULL!	-270.019	-338.204	-318.698	-564.628	#NULL!	#NULL!	645.367	-572.782	110.044	-392.805	#NULL!	#NULL!	#NULL!	#NULL!	-251.561	-232.7	#NULL!	#NULL!	-245.286	281.348
157.053	-132.452	210.641	-461.309	#NULL!	#NULL!	-56.3095	-12.6904	40.006	62.0331	#NULL!	#NULL!	297.52	-175.854	473.766	-666.223	#NULL!	#NULL!	-242.014	-386.357	127.077	743.067	#NULL!	#NULL!	-735.624	255.721	206.504	-71.0599	#NULL!	#NULL!	-283.908	-337.148	-323.508	-563.603	#NULL!	#NULL!	640.434	-572.772	105.735	-392.805	#NULL!	#NULL!	#NULL!	#NULL!	-256.487	-233.86	#NULL!	#NULL!	-235.985	282.442
147.22	-132.413	204.49	-461.674	#NULL!	#NULL!	-61.2259	-12.6707	47.3968	64.3385	#NULL!	#NULL!	396.099	-174.091	461.445	-666.156	#NULL!	#NULL!	-160.684	-384.492	141.877	745.336	#NULL!	#NULL!	-784.77	258.911	268.561	-69.1519	#NULL!	#NULL!	-343.754	-336.97	-345.439	-563.559	#NULL!	#NULL!	635.5	-572.762	113.741	-390.485	#NULL!	#NULL!	#NULL!	#NULL!	-215.243	-230.38	#NULL!	#NULL!	-240.936	283.636
142.304	-132.393	199.571	-461.654	#NULL!	#NULL!	-66.1423	-12.651	41.8752	66.6957	#NULL!	#NULL!	303.687	-174.717	454.668	-666.12	#NULL!	#NULL!	-203.807	-384.236	135.093	744.198	#NULL!	#NULL!	-737.74	260.8	256.258	-69.1275	#NULL!	#NULL!	-349.097	-336.954	-349.183	-563.552	#NULL!	#NULL!	630.567	-572.753	107.59	-388.165	#NULL!	#NULL!	#NULL!	#NULL!	-239.247	-230.38	#NULL!	#NULL!	-243.401	285.971
138.616	-132.379	194.652	-461.634	#NULL!	#NULL!	-70.4442	-12.6338	46.1917	69.0134	#NULL!	#NULL!	294.452	-173.488	600.686	-664.565	#NULL!	#NULL!	-240.141	-381.672	147.436	747.655	#NULL!	#NULL!	-780.491	259.913	272.844	-68.1448	#NULL!	#NULL!	-352.837	-336.942	-274.823	-561.668	#NULL!	#NULL!	625.634	-572.743	103.898	-388.165	#NULL!	#NULL!	#NULL!	#NULL!	-210.931	-228.059	#NULL!	#NULL!	-239.67	288.263
239.423	-128.119	177.436	-461.565	#NULL!	#NULL!	486.35	-12.5317	43.7445	71.3583	#NULL!	#NULL!	288.499	-173.061	596.373	-664.542	#NULL!	#NULL!	-136.011	-378.767	131.421	748.134	#NULL!	#NULL!	-733.461	261.802	264.286	-68.1278	#NULL!	#NULL!	-357.112	-336.93	-284.452	-561.649	#NULL!	#NULL!	620.701	-572.734	112.519	-385.844	#NULL!	#NULL!	#NULL!	#NULL!	-243.551	-228.059	#NULL!	#NULL!	-244.615	290.615
235.735	-128.105	172.517	-461.545	#NULL!	#NULL!	10.0671	-11.7904	48.6758	73.6735	#NULL!	#NULL!	438.003	-171.992	558.794	-664.337	#NULL!	#NULL!	-205.008	-378.358	125.874	747.772	#NULL!	#NULL!	-736.654	264.855	258.941	-67.1015	#NULL!	#NULL!	-365.119	-334.877	-187.091	-559.811	#NULL!	#NULL!	560.271	-572.616	107.599	-383.524	#NULL!	#NULL!	#NULL!	#NULL!	-249.09	-228.059	#NULL!	#NULL!	-240.883	292.907
159.526	-128.965	168.821	-462.698	#NULL!	#NULL!	-31.7225	-11.6231	46.2287	76.0184	#NULL!	#NULL!	433.074	-171.963	554.482	-664.313	#NULL!	#NULL!	-229.632	-374.689	149.922	751.166	#NULL!	#NULL!	-739.843	268.923	252.167	-66.7495	#NULL!	#NULL!	-368.325	-334.867	-193.514	-560.814	#NULL!	#NULL!	555.954	-572.608	103.906	-383.524	#NULL!	#NULL!	#NULL!	#NULL!	-252.785	-229.219	#NULL!	#NULL!	-244.589	295.251
155.229	-127.782	218.03	-459.393	#NULL!	#NULL!	496.809	-9.85343	62.2524	82.9592	#NULL!	#NULL!	428.146	-171.933	539.081	-664.23	#NULL!	#NULL!	-203.118	-370.149	133.912	752.428	#NULL!	#NULL!	-740.899	271.97	192.609	-67.9854	#NULL!	#NULL!	-372.599	-334.854	-196.724	-560.808	#NULL!	#NULL!	683.603	-570.538	140.837	-382.364	#NULL!	#NULL!	#NULL!	#NULL!	-239.238	-225.739	#NULL!	#NULL!	-245.802	299.895
143.552	-127.735	189.131	-459.277	#NULL!	#NULL!	490.662	-10.2174	51.197	85.3386	#NULL!	#NULL!	401.656	-171.776	534.153	-664.203	#NULL!	#NULL!	-230.84	-369.985	128.984	752.455	#NULL!	#NULL!	-746.234	274.015	267.504	-66.1029	#NULL!	#NULL!	-259.315	-334.177	-207.417	-559.771	#NULL!	#NULL!	678.67	-570.529	112.528	-380.817	#NULL!	#NULL!	#NULL!	#NULL!	-244.158	-223.418	#NULL!	#NULL!	-238.359	301.002
138.636	-127.716	213.123	-457.038	#NULL!	#NULL!	482.06	-9.79437	51.2216	90.0085	#NULL!	#NULL!	324.65	-171.319	529.224	-664.176	#NULL!	#NULL!	-202.483	-366.63	133.941	757.127	#NULL!	#NULL!	-771.819	289.311	253.605	-64.044	#NULL!	#NULL!	-283.895	-334.104	-270.534	-559.307	#NULL!	#NULL!	673.737	-570.519	105.146	-378.883	#NULL!	#NULL!	#NULL!	#NULL!	-249.082	-223.418	#NULL!	#NULL!	-246.395	304.535
132.502	-124.971	208.204	-457.018	#NULL!	#NULL!	475.913	-10.1583	59.873	98.1465	#NULL!	#NULL!	300.002	-172.346	524.296	-664.149	#NULL!	#NULL!	-232.053	-366.455	129.013	757.154	#NULL!	#NULL!	-746.162	291.264	245.069	-58.6104	#NULL!	#NULL!	-343.379	-332.574	-278.736	-559.29	#NULL!	#NULL!	668.804	-570.509	114.998	-376.563	#NULL!	#NULL!	#NULL!	#NULL!	-239.229	-220.711	#NULL!	#NULL!	-239.566	306.805
236.984	-123.446	203.285	-456.999	#NULL!	#NULL!	470.996	-10.1387	54.1547	102.061	#NULL!	#NULL!	392.421	-170.547	467.623	-663.449	#NULL!	#NULL!	-200.001	-363.123	125.317	757.174	#NULL!	#NULL!	-785.126	301.526	241.854	-59.9582	#NULL!	#NULL!	-350.153	-333.907	-310.83	-559.227	#NULL!	#NULL!	663.871	-570.5	110.074	-376.563	#NULL!	#NULL!	#NULL!	#NULL!	-252.155	-221.098	#NULL!	#NULL!	-250.718	307.269
233.297	-123.432	198.366	-456.979	#NULL!	#NULL!	466.08	-10.119	50.0474	100.521	#NULL!	#NULL!	295.092	-168.795	573.594	-662.068	#NULL!	#NULL!	-199.982	-359.6	138.884	759.449	#NULL!	#NULL!	-786.708	306.604	307.12	-58.0566	#NULL!	#NULL!	-354.423	-332.879	-314.402	-560.574	#NULL!	#NULL!	614.54	-570.404	101.455	-377.723	#NULL!	#NULL!	#NULL!	#NULL!	-246.611	-218.778	#NULL!	#NULL!	-255.677	306.918
155.249	-123.119	193.447	-456.959	#NULL!	#NULL!	461.164	-10.0993	58.6864	106.324	#NULL!	#NULL!	287.084	-168.747	568.666	-662.041	#NULL!	#NULL!	-231.395	-358.239	132.738	761.832	#NULL!	#NULL!	-770.114	313.657	230.814	-56.5508	#NULL!	#NULL!	-360.836	-332.86	-320.281	-559.547	#NULL!	#NULL!	610.84	-570.396	105.565	-373.856	#NULL!	#NULL!	#NULL!	#NULL!	-207.216	-216.457	#NULL!	#NULL!	-245.737	311.484
139.885	-123.058	171.312	-456.87	#NULL!	#NULL!	456.247	-10.0796	69.7603	107.447	#NULL!	#NULL!	424.474	-167.214	563.737	-662.014	#NULL!	#NULL!	-225.826	-353.576	127.81	761.859	#NULL!	#NULL!	-788.82	312.698	244.015	-54.8843	#NULL!	#NULL!	-263.582	-332.135	-345.064	-559.159	#NULL!	#NULL!	580.009	-569.95	112.544	-371.922	#NULL!	#NULL!	#NULL!	#NULL!	-211.525	-216.457	#NULL!	#NULL!	-251.933	311.527
134.978	-120.707	218.057	-454.334	#NULL!	#NULL!	451.331	-10.0599	74.0829	110.932	#NULL!	#NULL!	422.004	-168.374	461.474	-661.457	#NULL!	#NULL!	-230.138	-353.55	125.339	760.698	#NULL!	#NULL!	-770.635	316.702	241.871	-55.8957	#NULL!	#NULL!	-364.037	-331.836	-284.435	-557.587	#NULL!	#NULL!	573.841	-570.324	107.625	-369.602	#NULL!	#NULL!	#NULL!	#NULL!	-231.835	-216.071	#NULL!	#NULL!	-256.271	311.558
130.062	-120.687	188.952	-454.217	#NULL!	#NULL!	447.639	-11.2109	59.326	110.991	#NULL!	#NULL!	397.362	-168.228	600.707	-661.041	#NULL!	#NULL!	-225.802	-348.879	138.914	764.148	#NULL!	#NULL!	#NULL!	#NULL!	291.095	-52.9466	#NULL!	#NULL!	-369.381	-331.82	-187.074	-555.749	#NULL!	#NULL!	568.908	-570.315	103.932	-369.602	#NULL!	#NULL!	#NULL!	#NULL!	-237.99	-216.457	#NULL!	#NULL!	-245.708	316.506
125.76	-120.67	166.405	-454.516	#NULL!	#NULL!	442.727	-10.0255	74.7163	114.432	#NULL!	#NULL!	388.737	-168.177	596.403	-659.842	#NULL!	#NULL!	-229.504	-350.031	134	766.525	#NULL!	#NULL!	#NULL!	#NULL!	271.838	-52.9083	#NULL!	#NULL!	-372.587	-331.811	-190.819	-555.741	#NULL!	#NULL!	563.975	-570.305	112.553	-367.281	#NULL!	#NULL!	#NULL!	#NULL!	-242.914	-216.457	#NULL!	#NULL!	-251.907	316.163
235.77	-119.944	162.716	-454.501	#NULL!	#NULL!	419.374	-9.93196	58.7358	115.664	#NULL!	#NULL!	383.815	-166.973	558.826	-659.246	#NULL!	#NULL!	-190.046	-344.394	128.456	766.555	#NULL!	#NULL!	#NULL!	#NULL!	226.907	-52.8191	#NULL!	#NULL!	-251.813	-329.126	-206.331	-555.71	#NULL!	#NULL!	550.41	-569.893	107.633	-364.961	#NULL!	#NULL!	#NULL!	#NULL!	-249.684	-216.457	#NULL!	#NULL!	-256.864	316.198
229.629	-118.754	143.04	-454.422	#NULL!	#NULL!	416.911	-11.0879	61.2137	119.156	#NULL!	#NULL!	319.746	-166.593	552.663	-659.604	#NULL!	#NULL!	-223.313	-344.197	138.943	768.847	#NULL!	#NULL!	#NULL!	#NULL!	222.627	-52.8106	#NULL!	#NULL!	-255.019	-329.117	-266.24	-555.591	#NULL!	#NULL!	544.243	-570.267	103.941	-364.961	#NULL!	#NULL!	#NULL!	#NULL!	-208.439	-211.817	#NULL!	#NULL!	-237.029	317.217
225.327	-118.737	210.69	-451.969	#NULL!	#NULL!	17.4565	-8.32268	68.0698	136.642	#NULL!	#NULL!	293.269	-164.087	550.192	-660.766	#NULL!	#NULL!	-220.824	-339.515	131.565	771.237	#NULL!	#NULL!	#NULL!	#NULL!	220.484	-53.822	#NULL!	#NULL!	-260.363	-329.101	-270.519	-555.583	#NULL!	#NULL!	539.31	-570.257	112.561	-362.64	#NULL!	#NULL!	#NULL!	#NULL!	-210.903	-212.977	#NULL!	#NULL!	-249.402	320.781
138.675	-118.39	204.54	-452.334	#NULL!	#NULL!	-10.8129	-8.20949	72.4972	159.974	#NULL!	#NULL!	287.108	-164.05	541.575	-659.544	#NULL!	#NULL!	-219.568	-334.825	125.397	770.096	#NULL!	#NULL!	#NULL!	#NULL!	216.752	-50.7677	#NULL!	#NULL!	-339.979	-328.864	-274.798	-555.574	#NULL!	#NULL!	534.993	-570.249	121.182	-360.32	#NULL!	#NULL!	#NULL!	#NULL!	-218.288	-212.977	#NULL!	#NULL!	-254.36	320.816
132.54	-116.034	199.621	-452.314	#NULL!	#NULL!	-15.7293	-8.18981	91.3678	162.623	#NULL!	#NULL!	277.861	-165.17	536.646	-659.517	#NULL!	#NULL!	-125.923	-334.207	135.276	773.567	#NULL!	#NULL!	#NULL!	#NULL!	225.85	-49.7701	#NULL!	#NULL!	-359.75	-328.805	-278.542	-555.567	#NULL!	#NULL!	658.943	-567.786	107.642	-360.32	#NULL!	#NULL!	#NULL!	#NULL!	-229.364	-211.43	#NULL!	#NULL!	-259.317	320.851
127.623	-116.014	194.702	-452.294	#NULL!	#NULL!	-28.0253	-9.30634	73.1368	164.642	#NULL!	#NULL!	424.499	-162.518	531.718	-659.49	#NULL!	#NULL!	-98.7985	-330.846	135.298	777.091	#NULL!	#NULL!	#NULL!	#NULL!	222.64	-49.7638	#NULL!	#NULL!	-277.988	-327.019	-307.962	-555.509	#NULL!	#NULL!	652.776	-568.16	103.949	-360.32	#NULL!	#NULL!	#NULL!	#NULL!	-235.52	-211.817	#NULL!	#NULL!	-261.802	319.709
122.707	-115.994	170.107	-452.196	#NULL!	#NULL!	-43.9988	-8.07662	92.8251	166.898	#NULL!	#NULL!	418.332	-163.655	527.406	-659.467	#NULL!	#NULL!	-219.55	-331.303	130.391	780.642	#NULL!	#NULL!	#NULL!	#NULL!	204.458	-48.712	#NULL!	#NULL!	-347.986	-326.811	-316.52	-555.491	#NULL!	#NULL!	647.843	-568.151	112.57	-358	#NULL!	#NULL!	#NULL!	#NULL!	-240.444	-211.817	#NULL!	#NULL!	-250.613	325.811
224.732	-114.071	216.849	-450.048	#NULL!	#NULL!	-48.9152	-8.05693	72.5465	169.314	#NULL!	#NULL!	391.226	-163.494	521.245	-659.433	#NULL!	#NULL!	-229.406	-331.244	135.951	782.961	#NULL!	#NULL!	#NULL!	#NULL!	196.434	-48.6961	#NULL!	#NULL!	-352.261	-326.798	-343.264	-555.1	#NULL!	#NULL!	642.91	-568.141	120.576	-355.679	#NULL!	#NULL!	#NULL!	#NULL!	-245.367	-211.817	#NULL!	#NULL!	-256.812	325.469
147.299	-113.761	188.977	-449.547	#NULL!	#NULL!	-53.8316	-8.03725	95.9241	171.555	#NULL!	#NULL!	379.735	-161.861	468.881	-659.148	#NULL!	#NULL!	-100.006	-326.142	132.269	785.331	#NULL!	#NULL!	#NULL!	#NULL!	253.142	-46.7775	#NULL!	#NULL!	-356.54	-327.8	-346.479	-556.448	#NULL!	#NULL!	637.977	-568.131	107.651	-355.293	#NULL!	#NULL!	#NULL!	#NULL!	-247.831	-212.977	#NULL!	#NULL!	-261.769	325.503
137.466	-113.722	163.972	-449.447	#NULL!	#NULL!	-58.1335	-8.02002	92.2348	171.57	#NULL!	#NULL!	317.3	-163.055	463.953	-659.121	#NULL!	#NULL!	-219.525	-326.606	135.98	787.66	#NULL!	#NULL!	#NULL!	#NULL!	200.187	-46.6723	#NULL!	#NULL!	-255.002	-325.058	-283.883	-553.525	#NULL!	#NULL!	633.044	-568.122	103.956	-356.84	#NULL!	#NULL!	#NULL!	#NULL!	-221.977	-210.656	#NULL!	#NULL!	-265.488	325.529
119.029	-113.648	159.051	-449.816	#NULL!	#NULL!	-63.6694	-9.16362	73.7948	172.812	#NULL!	#NULL!	413.422	-160.104	452.248	-659.058	#NULL!	#NULL!	-229.382	-326.548	153.852	788.738	#NULL!	#NULL!	#NULL!	#NULL!	205.01	-44.6506	#NULL!	#NULL!	-258.743	-325.047	-187.057	-551.686	#NULL!	#NULL!	628.111	-568.112	115.04	-353.359	#NULL!	#NULL!	#NULL!	#NULL!	-234.279	-206.789	#NULL!	#NULL!	-248.109	330.43
132.561	-110.982	144.706	-449.37	#NULL!	#NULL!	-67.3567	-9.14885	94.719	176.23	#NULL!	#NULL!	387.542	-161.124	569.927	-657.349	#NULL!	#NULL!	-180.074	-322.144	#NULL!	#NULL!	#NULL!	#NULL!	#NULL!	#NULL!	195.917	-44.6325	#NULL!	#NULL!	-261.419	-326.054	-191.336	-551.678	#NULL!	#NULL!	623.177	-568.103	118.738	-351.039	#NULL!	#NULL!	#NULL!	#NULL!	-240.435	-207.176	#NULL!	#NULL!	-253.068	330.078
126.414	-111.346	210.715	-447.299	#NULL!	#NULL!	439.045	-8.84496	73.2107	178.652	#NULL!	#NULL!	419.595	-157.792	564.999	-657.322	#NULL!	#NULL!	-229.351	-320.677	#NULL!	#NULL!	#NULL!	#NULL!	#NULL!	#NULL!	186.823	-44.6145	#NULL!	#NULL!	-335.688	-324.818	-207.383	-551.646	#NULL!	#NULL!	618.244	-568.093	110.122	-350.652	#NULL!	#NULL!	#NULL!	#NULL!	-244.13	-208.336	#NULL!	#NULL!	-262.983	330.148
121.497	-111.326	204.564	-447.664	#NULL!	#NULL!	413.233	-8.74161	73.8503	183.319	#NULL!	#NULL!	382.632	-157.572	546.52	-656.83	#NULL!	#NULL!	-229.333	-317.154	#NULL!	#NULL!	#NULL!	#NULL!	#NULL!	#NULL!	230.517	-42.3315	#NULL!	#NULL!	-340.501	-325.818	-267.292	-551.527	#NULL!	#NULL!	557.814	-567.589	104.582	-351.039	#NULL!	#NULL!	#NULL!	#NULL!	-247.823	-208.336	#NULL!	#NULL!	-266.688	332.491
221.679	-109.396	199.645	-447.644	#NULL!	#NULL!	408.317	-8.72193	74.4898	187.987	#NULL!	#NULL!	378.93	-158.725	595.816	-655.14	#NULL!	#NULL!	-96.2489	-314.422	#NULL!	#NULL!	#NULL!	#NULL!	#NULL!	#NULL!	191.647	-42.2543	#NULL!	#NULL!	-351.175	-322.743	-271.572	-551.518	#NULL!	#NULL!	670.047	-565.876	112.589	-347.558	#NULL!	#NULL!	#NULL!	#NULL!	-226.889	-204.469	#NULL!	#NULL!	-245.606	334.661
145.475	-109.091	194.726	-447.624	#NULL!	#NULL!	391.11	-8.65303	75.1293	192.654	#NULL!	#NULL!	312.397	-158.33	590.887	-655.113	#NULL!	#NULL!	-214.536	-314.894	#NULL!	#NULL!	#NULL!	#NULL!	#NULL!	#NULL!	183.089	-42.2373	#NULL!	#NULL!	-258.726	-320.989	-275.851	-551.51	#NULL!	#NULL!	665.114	-565.866	107.668	-346.398	#NULL!	#NULL!	#NULL!	#NULL!	-219.502	-203.695	#NULL!	#NULL!	-249.944	334.692
135.037	-106.718	189.813	-446.437	#NULL!	#NULL!	350.549	-8.49062	70.2042	191.506	#NULL!	#NULL!	308.09	-157.13	558.853	-654.939	#NULL!	#NULL!	-96.2245	-309.725	#NULL!	#NULL!	#NULL!	#NULL!	#NULL!	#NULL!	179.874	-43.5851	#NULL!	#NULL!	-335.136	-320.761	-277.995	-552.521	#NULL!	#NULL!	612.906	-565.379	103.359	-346.398	#NULL!	#NULL!	#NULL!	#NULL!	-234.271	-202.148	#NULL!	#NULL!	-269.76	337.149
130.121	-106.698	162.765	-445.161	#NULL!	#NULL!	343.174	-8.4611	76.3837	197.319	#NULL!	#NULL!	276.056	-156.94	553.925	-654.912	#NULL!	#NULL!	-208.333	-306.711	#NULL!	#NULL!	#NULL!	#NULL!	#NULL!	#NULL!	176.679	-40.1933	#NULL!	#NULL!	-349.555	-318.689	-305.27	-551.451	#NULL!	#NULL!	584.951	-565.324	99.0553	-344.078	#NULL!	#NULL!	#NULL!	#NULL!	-239.811	-202.535	#NULL!	#NULL!	-245.58	339.297
125.204	-106.678	157.846	-445.141	#NULL!	#NULL!	260.824	-8.13137	72.6883	196.166	#NULL!	#NULL!	407.28	-156.544	539.14	-654.832	#NULL!	#NULL!	-223.118	-306.623	#NULL!	#NULL!	#NULL!	#NULL!	#NULL!	#NULL!	248.358	-39.6585	#NULL!	#NULL!	-259.777	-316.927	-314.363	-551.433	#NULL!	#NULL!	580.015	-566.86	106.445	-341.757	#NULL!	#NULL!	#NULL!	#NULL!	-242.89	-203.695	#NULL!	#NULL!	-249.918	339.327
121.517	-106.663	146.778	-445.097	#NULL!	#NULL!	219.035	-7.96404	107.275	225.216	#NULL!	#NULL!	374.013	-156.347	534.211	-654.805	#NULL!	#NULL!	-96.2002	-305.028	#NULL!	#NULL!	#NULL!	#NULL!	#NULL!	#NULL!	235.525	-38.6174	#NULL!	#NULL!	-334.051	-316.706	-338.967	-551.046	#NULL!	#NULL!	575.084	-565.691	101.522	-341.757	#NULL!	#NULL!	#NULL!	#NULL!	-202.257	-197.508	#NULL!	#NULL!	-254.875	339.362
217.397	-104.716	142.474	-445.08	#NULL!	#NULL!	210.431	-7.92959	83.3816	241.657	#NULL!	#NULL!	271.75	-155.74	529.283	-654.778	#NULL!	#NULL!	-212.633	-304.337	#NULL!	#NULL!	#NULL!	#NULL!	#NULL!	#NULL!	230.176	-38.6068	#NULL!	#NULL!	-338.33	-317.708	-344.318	-551.374	#NULL!	#NULL!	570.151	-565.682	115.066	-339.437	#NULL!	#NULL!	#NULL!	#NULL!	-207.798	-197.894	#NULL!	#NULL!	-264.776	341.75
143.651	-104.421	213.199	-442.639	#NULL!	#NULL!	118.248	-7.56049	114.138	243.868	#NULL!	#NULL!	254.5	-155.637	524.971	-654.754	#NULL!	#NULL!	-208.308	-302.014	#NULL!	#NULL!	#NULL!	#NULL!	#NULL!	#NULL!	220.192	-38.2484	#NULL!	#NULL!	-345.272	-316.673	-346.462	-552.385	#NULL!	#NULL!	565.218	-565.672	110.762	-337.116	#NULL!	#NULL!	#NULL!	#NULL!	-210.877	-199.054	#NULL!	#NULL!	-270.353	341.789
141.188	-105.576	207.048	-443.004	#NULL!	#NULL!	113.332	-7.54081	113.609	260.216	#NULL!	#NULL!	247.108	-155.594	520.658	-654.731	#NULL!	#NULL!	-218.165	-301.956	#NULL!	#NULL!	#NULL!	#NULL!	#NULL!	#NULL!	191.664	-38.1918	#NULL!	#NULL!	-257.623	-312.875	-281.191	-549.468	#NULL!	#NULL!	550.419	-565.643	105.223	-337.116	#NULL!	#NULL!	#NULL!	#NULL!	-228.108	-197.894	#NULL!	#NULL!	-248.039	342.791
135.057	-102.055	202.129	-442.984	#NULL!	#NULL!	108.415	-7.52112	113.634	264.886	#NULL!	#NULL!	417.149	-154.255	467.679	-654.442	#NULL!	#NULL!	-221.861	-301.934	#NULL!	#NULL!	#NULL!	#NULL!	#NULL!	#NULL!	186.314	-38.5197	#NULL!	#NULL!	-329.763	-313.675	-189.18	-547.619	#NULL!	#NULL!	545.486	-565.634	100.299	-337.116	#NULL!	#NULL!	#NULL!	#NULL!	-233.032	-197.894	#NULL!	#NULL!	-252.99	343.985
130.141	-102.035	197.21	-442.964	#NULL!	#NULL!	98.5824	-7.48175	113.043	269.558	#NULL!	#NULL!	367.902	-146.917	463.366	-654.419	#NULL!	#NULL!	-213.225	-299.637	#NULL!	#NULL!	#NULL!	#NULL!	#NULL!	#NULL!	182.035	-38.5112	#NULL!	#NULL!	-342.587	-313.637	-207.366	-547.583	#NULL!	#NULL!	540.553	-565.624	113.844	-334.796	#NULL!	#NULL!	#NULL!	#NULL!	-236.727	-199.054	#NULL!	#NULL!	-257.934	346.337
125.224	-102.015	192.906	-442.947	#NULL!	#NULL!	93.666	-7.46206	114.907	273.053	#NULL!	#NULL!	274.269	-145.187	457.822	-654.389	#NULL!	#NULL!	-204.588	-297.339	#NULL!	#NULL!	#NULL!	#NULL!	#NULL!	#NULL!	171.871	-38.491	#NULL!	#NULL!	-240.336	-310.559	-268.345	-547.462	#NULL!	#NULL!	535.619	-565.615	107.693	-332.476	#NULL!	#NULL!	#NULL!	#NULL!	-201.019	-193.254	#NULL!	#NULL!	-262.272	346.368
120.922	-101.998	161.56	-440.486	#NULL!	#NULL!	88.7496	-7.44238	87.8768	277.832	#NULL!	#NULL!	257.019	-145.084	454.126	-654.369	#NULL!	#NULL!	-91.2108	-293.316	#NULL!	#NULL!	#NULL!	#NULL!	#NULL!	#NULL!	143.522	-38.4347	#NULL!	#NULL!	-257.076	-309.833	-272.624	-547.454	#NULL!	#NULL!	658.952	-563.537	102.77	-332.476	#NULL!	#NULL!	#NULL!	#NULL!	-204.714	-194.414	#NULL!	#NULL!	-267.229	346.402
213.725	-101.204	156.641	-440.466	#NULL!	#NULL!	42.0485	-6.08962	92.8759	292.989	#NULL!	#NULL!	249.621	-146.215	586.387	-652.348	#NULL!	#NULL!	-205.179	-292.639	#NULL!	#NULL!	#NULL!	#NULL!	#NULL!	#NULL!	245.157	-37.6209	#NULL!	#NULL!	-340.433	-309.585	-276.904	-547.445	#NULL!	#NULL!	654.019	-563.527	106.471	-327.835	#NULL!	#NULL!	#NULL!	#NULL!	-203.472	-188.613	#NULL!	#NULL!	-272.806	346.442
206.355	-100.008	152.337	-440.449	#NULL!	#NULL!	37.132	-6.06994	122.415	297.541	#NULL!	#NULL!	385.785	-143.501	569.949	-653.824	#NULL!	#NULL!	-169.436	-290.503	#NULL!	#NULL!	#NULL!	#NULL!	#NULL!	#NULL!	176.694	-36.4693	#NULL!	#NULL!	-235.69	-306.853	-303.649	-547.392	#NULL!	#NULL!	647.852	-563.515	104.007	-328.995	#NULL!	#NULL!	#NULL!	#NULL!	-229.322	-188.613	#NULL!	#NULL!	-250.485	348.603
138.754	-99.7379	146.797	-441.594	#NULL!	#NULL!	32.2156	-6.05025	122.433	301.043	#NULL!	#NULL!	362.991	-143.365	549.011	-652.536	#NULL!	#NULL!	-203.305	-287.562	#NULL!	#NULL!	#NULL!	#NULL!	#NULL!	#NULL!	168.136	-36.4523	#NULL!	#NULL!	-243.175	-307.845	-314.346	-547.371	#NULL!	#NULL!	642.919	-563.505	105.253	-320.874	#NULL!	#NULL!	#NULL!	#NULL!	-202.848	-183.972	#NULL!	#NULL!	-255.429	350.955
201.448	-97.6574	141.884	-440.407	#NULL!	#NULL!	27.2992	-6.03057	127.432	316.201	#NULL!	#NULL!	360.521	-144.525	544.083	-652.509	#NULL!	#NULL!	-208.851	-287.921	#NULL!	#NULL!	#NULL!	#NULL!	#NULL!	#NULL!	163.857	-36.4438	#NULL!	#NULL!	-328.656	-304.547	-334.673	-547.33	#NULL!	#NULL!	637.986	-563.496	104.646	-316.233	#NULL!	#NULL!	#NULL!	#NULL!	-220.699	-185.132	#NULL!	#NULL!	-259.767	350.986
197.761	-97.6426	218.141	-438.378	#NULL!	#NULL!	22.3828	-6.01088	127.457	320.871	#NULL!	#NULL!	296.459	-142.97	592.149	-650.421	#NULL!	#NULL!	-133.059	-284.848	#NULL!	#NULL!	#NULL!	#NULL!	#NULL!	#NULL!	50.4576	-36.2186	#NULL!	#NULL!	-338.986	-304.178	-338.952	-547.322	#NULL!	#NULL!	633.053	-563.486	94.1808	-317.393	#NULL!	#NULL!	#NULL!	#NULL!	-226.851	-183.972	#NULL!	#NULL!	-266.59	349.875
131.389	-97.3769	213.222	-438.358	#NULL!	#NULL!	13.779	-5.97643	127.481	325.541	#NULL!	#NULL!	292.146	-142.945	553.954	-650.213	#NULL!	#NULL!	-200.818	-283.271	#NULL!	#NULL!	#NULL!	#NULL!	#NULL!	#NULL!	235.542	-34.5549	#NULL!	#NULL!	-236.742	-302.791	-342.161	-547.316	#NULL!	#NULL!	628.12	-563.477	105.27	-311.592	#NULL!	#NULL!	#NULL!	#NULL!	-230.544	-183.972	#NULL!	#NULL!	-272.786	349.918
126.473	-97.3572	208.303	-438.339	#NULL!	#NULL!	-36.6143	-5.77466	99.2219	330.324	#NULL!	#NULL!	264.424	-142.78	539.169	-650.133	#NULL!	#NULL!	-205.131	-283.246	#NULL!	#NULL!	#NULL!	#NULL!	#NULL!	#NULL!	230.193	-34.5443	#NULL!	#NULL!	-333.991	-302.502	-193.451	-545.58	#NULL!	#NULL!	623.187	-563.467	108.967	-309.272	#NULL!	#NULL!	#NULL!	#NULL!	-203.457	-180.492	#NULL!	#NULL!	-250.459	353.238
121.556	-97.3375	203.384	-438.319	#NULL!	#NULL!	473.474	-5.48553	132.438	332.526	#NULL!	#NULL!	381.485	-141.127	534.241	-650.106	#NULL!	#NULL!	-133.029	-278.977	#NULL!	#NULL!	#NULL!	#NULL!	#NULL!	#NULL!	221.634	-34.5273	#NULL!	#NULL!	-244.214	-300.74	-280.104	-545.408	#NULL!	#NULL!	618.254	-563.457	105.279	-306.952	#NULL!	#NULL!	#NULL!	#NULL!	-226.845	-180.492	#NULL!	#NULL!	-256.643	355.6
116.64	-97.3178	198.465	-438.299	#NULL!	#NULL!	469.173	-5.4683	98.0107	333.832	#NULL!	#NULL!	357.256	-140.591	529.312	-650.079	#NULL!	#NULL!	-200.381	-278.186	#NULL!	#NULL!	#NULL!	#NULL!	#NULL!	#NULL!	217.89	-34.5199	#NULL!	#NULL!	-247.42	-300.73	-189.163	-543.557	#NULL!	#NULL!	606.538	-563.435	104.056	-302.311	#NULL!	#NULL!	#NULL!	#NULL!	-231.767	-179.331	#NULL!	#NULL!	-259.128	354.458
206.37	-96.5113	193.546	-438.279	#NULL!	#NULL!	462.412	-5.44124	101.768	346.659	#NULL!	#NULL!	351.909	-142.125	524.384	-650.052	#NULL!	#NULL!	-204.496	-279.727	#NULL!	#NULL!	#NULL!	#NULL!	#NULL!	#NULL!	208.798	-34.1633	#NULL!	#NULL!	-327.036	-300.493	-197.186	-543.541	#NULL!	#NULL!	560.29	-563.345	106.522	-299.991	#NULL!	#NULL!	#NULL!	#NULL!	-220.064	-174.691	#NULL!	#NULL!	-270.275	355.695
136.311	-96.2308	161.585	-435.816	#NULL!	#NULL!	458.72	-6.59222	98.0785	346.674	#NULL!	#NULL!	348.212	-142.103	520.688	-650.032	#NULL!	#NULL!	-197.893	-273.504	#NULL!	#NULL!	#NULL!	#NULL!	#NULL!	#NULL!	203.448	-34.4912	#NULL!	#NULL!	-338.262	-301.474	-207.354	-544.536	#NULL!	#NULL!	555.357	-563.335	104.069	-295.35	#NULL!	#NULL!	#NULL!	#NULL!	-192.363	-172.37	#NULL!	#NULL!	-265.305	357.978
110.504	-94.9617	156.666	-435.796	#NULL!	#NULL!	451.346	-6.56269	101.792	351.329	#NULL!	#NULL!	258.276	-140.395	470.172	-649.757	#NULL!	#NULL!	-202.008	-275.045	#NULL!	#NULL!	#NULL!	#NULL!	#NULL!	#NULL!	199.168	-34.4827	#NULL!	#NULL!	-235.656	-298.736	-270.468	-543.395	#NULL!	#NULL!	668.823	-561.238	100.376	-295.35	#NULL!	#NULL!	#NULL!	#NULL!	-242.835	-173.53	#NULL!	#NULL!	-255.384	359.068
105.588	-94.942	152.976	-435.782	#NULL!	#NULL!	83.8479	-3.92546	103.047	355.994	#NULL!	#NULL!	391.348	-140.011	466.476	-649.737	#NULL!	#NULL!	-165.027	-271.742	#NULL!	#NULL!	#NULL!	#NULL!	#NULL!	#NULL!	194.889	-34.4742	#NULL!	#NULL!	-330.772	-299.467	-273.681	-544.405	#NULL!	#NULL!	663.89	-561.229	102.847	-290.709	#NULL!	#NULL!	#NULL!	#NULL!	-221.081	-169.663	#NULL!	#NULL!	-260.334	360.261
201.463	-94.1601	139.449	-435.727	#NULL!	#NULL!	54.9639	-3.80981	103.071	360.664	#NULL!	#NULL!	386.42	-139.982	457.851	-649.69	#NULL!	#NULL!	-195.817	-269.211	#NULL!	#NULL!	#NULL!	#NULL!	#NULL!	#NULL!	191.145	-34.4668	#NULL!	#NULL!	-335.577	-298.438	-300.957	-543.335	#NULL!	#NULL!	612.092	-561.128	99.1539	-290.709	#NULL!	#NULL!	#NULL!	#NULL!	-188.662	-167.73	#NULL!	#NULL!	-270.249	360.331
195.322	-92.9698	215.706	-433.698	#NULL!	#NULL!	46.9764	-3.38924	137.511	361.694	#NULL!	#NULL!	378.417	-138.76	454.155	-649.67	#NULL!	#NULL!	-199.519	-270.363	#NULL!	#NULL!	#NULL!	#NULL!	#NULL!	#NULL!	185.261	-34.4551	#NULL!	#NULL!	-245.266	-296.678	-313.795	-543.309	#NULL!	#NULL!	587.427	-561.08	102.855	-286.068	#NULL!	#NULL!	#NULL!	#NULL!	-242.826	-168.89	#NULL!	#NULL!	-265.279	362.614
130.18	-92.709	210.787	-433.678	#NULL!	#NULL!	17.4779	-3.27113	103.096	365.334	#NULL!	#NULL!	292.781	-139.426	585.387	-648.035	#NULL!	#NULL!	-165.002	-267.045	#NULL!	#NULL!	#NULL!	#NULL!	#NULL!	#NULL!	180.982	-34.4466	#NULL!	#NULL!	-248.472	-296.668	-334.656	-543.268	#NULL!	#NULL!	582.494	-561.07	99.1625	-286.068	#NULL!	#NULL!	#NULL!	#NULL!	-206.506	-165.409	#NULL!	#NULL!	-275.193	362.683
125.878	-92.6917	205.868	-433.659	#NULL!	#NULL!	-14.4805	-3.53176	103.121	370.004	#NULL!	#NULL!	271.835	-139.301	549.043	-647.445	#NULL!	#NULL!	-194.56	-264.521	#NULL!	#NULL!	#NULL!	#NULL!	#NULL!	#NULL!	172.423	-34.4296	#NULL!	#NULL!	-320.073	-296.455	-338.4	-543.26	#NULL!	#NULL!	577.561	-561.061	89.3191	-283.748	#NULL!	#NULL!	#NULL!	#NULL!	-216.97	-165.409	#NULL!	#NULL!	-269.603	364.962
119.118	-92.6647	200.949	-433.639	#NULL!	#NULL!	-19.397	-3.51207	103.145	374.674	#NULL!	#NULL!	263.832	-138.08	542.88	-647.803	#NULL!	#NULL!	-164.984	-263.523	#NULL!	#NULL!	#NULL!	#NULL!	#NULL!	#NULL!	159.586	-34.4041	#NULL!	#NULL!	-323.813	-296.444	-194.503	-541.515	#NULL!	#NULL!	572.627	-561.051	102.864	-281.428	#NULL!	#NULL!	#NULL!	#NULL!	-221.893	-165.409	#NULL!	#NULL!	-260.293	367.601
114.201	-92.645	196.03	-433.619	#NULL!	#NULL!	-41.5209	-3.42349	103.17	379.344	#NULL!	#NULL!	247.199	-137.981	536.736	-645.029	#NULL!	#NULL!	-190.852	-262.195	#NULL!	#NULL!	#NULL!	#NULL!	#NULL!	#NULL!	118.933	-34.3234	#NULL!	#NULL!	-338.766	-294.37	-200.387	-541.503	#NULL!	#NULL!	567.694	-561.041	97.9401	-281.428	#NULL!	#NULL!	#NULL!	#NULL!	-186.194	-164.249	#NULL!	#NULL!	-266.492	367.258
102.525	-92.5982	191.726	-433.602	#NULL!	#NULL!	-46.4373	-3.4038	103.195	384.014	#NULL!	#NULL!	374.117	-136.386	530.574	-645.387	#NULL!	#NULL!	-194.536	-259.824	#NULL!	#NULL!	#NULL!	#NULL!	#NULL!	#NULL!	94.328	-34.2745	#NULL!	#NULL!	-245.249	-292.619	-280.087	-541.345	#NULL!	#NULL!	550.429	-560.621	93.0163	-281.428	#NULL!	#NULL!	#NULL!	#NULL!	-180.648	-160.768	#NULL!	#NULL!	-257.788	372.219
108.066	-90.2889	161.609	-431.146	#NULL!	#NULL!	-50.7392	-3.38658	102.666	400.361	#NULL!	#NULL!	369.805	-136.36	525.645	-645.36	#NULL!	#NULL!	-190.827	-257.498	#NULL!	#NULL!	#NULL!	#NULL!	#NULL!	#NULL!	92.1841	-35.2859	#NULL!	#NULL!	-321.125	-292.394	-185.936	-539.501	#NULL!	#NULL!	544.262	-560.996	89.9432	-279.107	#NULL!	#NULL!	#NULL!	#NULL!	-207.113	-160.768	#NULL!	#NULL!	-263.987	371.876
194.113	-88.3019	156.69	-431.127	#NULL!	#NULL!	-55.041	-3.36935	98.3744	402.714	#NULL!	#NULL!	356.861	-137.458	520.717	-645.333	#NULL!	#NULL!	-194.512	-255.128	#NULL!	#NULL!	#NULL!	#NULL!	#NULL!	#NULL!	47.2567	-34.181	#NULL!	#NULL!	-323.266	-293.402	-263.674	-539.008	#NULL!	#NULL!	539.329	-560.986	99.1796	-276.787	#NULL!	#NULL!	#NULL!	#NULL!	-212.033	-158.448	#NULL!	#NULL!	-270.184	371.92
189.811	-88.2847	153.001	-431.112	#NULL!	#NULL!	78.9413	-1.57429	102.07	403.866	#NULL!	#NULL!	353.165	-137.436	518.245	-646.494	#NULL!	#NULL!	-190.803	-252.801	#NULL!	#NULL!	#NULL!	#NULL!	#NULL!	#NULL!	27.6451	-33.8035	#NULL!	#NULL!	-337.146	-290.317	-268.315	-540.353	#NULL!	#NULL!	535.012	-560.978	94.2558	-276.787	#NULL!	#NULL!	#NULL!	#NULL!	-216.957	-158.448	#NULL!	#NULL!	-285.056	372.024
128.97	-88.0411	138.244	-431.053	#NULL!	#NULL!	74.0249	-1.55461	107.659	414.352	#NULL!	#NULL!	345.163	-136.214	472.668	-644.68	#NULL!	#NULL!	-111.943	-252.095	#NULL!	#NULL!	#NULL!	#NULL!	#NULL!	#NULL!	225.918	-33.5202	#NULL!	#NULL!	-242.026	-288.57	-300.405	-539.274	#NULL!	#NULL!	658.962	-558.901	89.3363	-274.466	#NULL!	#NULL!	#NULL!	#NULL!	-221.265	-158.448	#NULL!	#NULL!	-274.509	374.268
126.507	-89.197	212.041	-429.013	#NULL!	#NULL!	69.1085	-1.53492	103.367	416.704	#NULL!	#NULL!	287.864	-137.048	466.505	-645.038	#NULL!	#NULL!	-194.487	-250.431	#NULL!	#NULL!	#NULL!	#NULL!	#NULL!	#NULL!	176.711	-32.4068	#NULL!	#NULL!	-247.903	-288.553	-313.243	-539.248	#NULL!	#NULL!	654.029	-558.891	97.9573	-272.146	#NULL!	#NULL!	#NULL!	#NULL!	-176.946	-156.128	#NULL!	#NULL!	-257.764	376.468
117.909	-87.9968	207.122	-428.994	#NULL!	#NULL!	64.192	-1.51524	107.069	419.024	#NULL!	#NULL!	283.558	-135.848	464.034	-646.199	#NULL!	#NULL!	-190.779	-248.105	#NULL!	#NULL!	#NULL!	#NULL!	#NULL!	#NULL!	168.153	-32.3899	#NULL!	#NULL!	-323.245	-288.329	-331.429	-539.212	#NULL!	#NULL!	646.63	-558.491	93.6489	-272.146	#NULL!	#NULL!	#NULL!	#NULL!	-207.104	-155.741	#NULL!	#NULL!	-263.341	376.507
112.992	-87.9771	202.203	-428.974	#NULL!	#NULL!	59.2756	-1.49555	107.708	423.692	#NULL!	#NULL!	268.151	-136.931	457.883	-644.599	#NULL!	#NULL!	-194.463	-245.734	#NULL!	#NULL!	#NULL!	#NULL!	#NULL!	#NULL!	163.874	-32.3814	#NULL!	#NULL!	-326.451	-288.319	-336.778	-539.201	#NULL!	#NULL!	640.462	-558.865	97.9658	-267.505	#NULL!	#NULL!	#NULL!	#NULL!	-214.486	-153.421	#NULL!	#NULL!	-270.156	376.942
101.93	-87.9328	197.284	-428.954	#NULL!	#NULL!	39.6099	-1.41681	145.843	425.874	#NULL!	#NULL!	253.366	-136.843	451.72	-644.957	#NULL!	#NULL!	-190.754	-243.408	#NULL!	#NULL!	#NULL!	#NULL!	#NULL!	#NULL!	155.315	-32.3644	#NULL!	#NULL!	-335.526	-286.263	-197.696	-537.446	#NULL!	#NULL!	635.529	-558.856	94.273	-267.505	#NULL!	#NULL!	#NULL!	#NULL!	-220.641	-153.807	#NULL!	#NULL!	-280.07	377.011
98.2428	-87.918	192.365	-428.935	#NULL!	#NULL!	34.6935	-1.39712	107.733	428.361	#NULL!	#NULL!	241.051	-135.596	579.872	-643.305	#NULL!	#NULL!	-194.438	-241.038	#NULL!	#NULL!	#NULL!	#NULL!	#NULL!	#NULL!	151.571	-32.3569	#NULL!	#NULL!	-238.445	-284.185	-200.905	-537.44	#NULL!	#NULL!	630.596	-558.846	84.4275	-266.345	#NULL!	#NULL!	#NULL!	#NULL!	-225.565	-153.807	#NULL!	#NULL!	-283.797	375.492
122.835	-85.685	187.446	-428.915	#NULL!	#NULL!	29.7771	-1.37744	150.172	430.526	#NULL!	#NULL!	364.888	-133.983	549.07	-643.138	#NULL!	#NULL!	-190.73	-238.711	#NULL!	#NULL!	#NULL!	#NULL!	#NULL!	#NULL!	49.9397	-32.1551	#NULL!	#NULL!	-242.013	-285.527	-277.931	-537.287	#NULL!	#NULL!	625.663	-558.836	97.9744	-262.865	#NULL!	#NULL!	#NULL!	#NULL!	-229.873	-153.807	#NULL!	#NULL!	-269.512	381.186
108.7	-85.6284	161.634	-426.476	#NULL!	#NULL!	24.8607	-1.35775	105.913	433.039	#NULL!	#NULL!	349.481	-135.065	544.141	-643.111	#NULL!	#NULL!	-194.414	-236.341	#NULL!	#NULL!	#NULL!	#NULL!	#NULL!	#NULL!	-17.278	-31.683	#NULL!	#NULL!	-324.297	-284.267	-181.64	-535.447	#NULL!	#NULL!	620.73	-558.827	93.6661	-262.865	#NULL!	#NULL!	#NULL!	#NULL!	-232.953	-154.968	#NULL!	#NULL!	-275.089	381.226
191.67	-84.7948	156.715	-426.457	#NULL!	#NULL!	-23.689	-1.16336	107.782	437.702	#NULL!	#NULL!	369.207	-132.834	514.564	-644.125	#NULL!	#NULL!	-118.018	-235.62	#NULL!	#NULL!	#NULL!	#NULL!	#NULL!	#NULL!	210.949	-31.4592	#NULL!	#NULL!	-330.713	-285.263	-259.736	-535.292	#NULL!	#NULL!	615.797	-558.817	96.752	-258.224	#NULL!	#NULL!	#NULL!	#NULL!	-202.174	-152.647	#NULL!	#NULL!	-280.046	381.26
186.753	-84.7751	153.02	-427.609	#NULL!	#NULL!	-31.6831	-2.29711	107.192	442.374	#NULL!	#NULL!	359.972	-131.605	509.643	-642.923	#NULL!	#NULL!	-190.706	-234.014	#NULL!	#NULL!	#NULL!	#NULL!	#NULL!	#NULL!	206.67	-31.4507	#NULL!	#NULL!	-326.426	-282.232	-272.573	-535.266	#NULL!	#NULL!	607.165	-558.414	91.8282	-258.224	#NULL!	#NULL!	#NULL!	#NULL!	-207.098	-152.647	#NULL!	#NULL!	-283.764	381.286
181.842	-83.5897	207.147	-424.324	#NULL!	#NULL!	-36.5995	-2.27743	150.246	444.536	#NULL!	#NULL!	343.955	-131.51	539.227	-640.735	#NULL!	#NULL!	-106.899	-229.815	#NULL!	#NULL!	#NULL!	#NULL!	#NULL!	#NULL!	202.391	-31.4422	#NULL!	#NULL!	-235.58	-280.473	-297.89	-534.877	#NULL!	#NULL!	602.231	-558.791	88.1354	-258.224	#NULL!	#NULL!	#NULL!	#NULL!	-202.15	-139.498	#NULL!	#NULL!	-266.388	385.8
126.532	-83.3683	202.228	-424.304	#NULL!	#NULL!	473.489	-1.9883	108.447	447.039	#NULL!	#NULL!	339.637	-132.659	534.299	-640.708	#NULL!	#NULL!	-111.211	-229.79	#NULL!	#NULL!	#NULL!	#NULL!	#NULL!	#NULL!	198.111	-31.4337	#NULL!	#NULL!	-241.992	-280.454	-313.226	-535.186	#NULL!	#NULL!	562.767	-558.328	94.2987	-253.583	#NULL!	#NULL!	#NULL!	#NULL!	-208.306	-139.885	#NULL!	#NULL!	-277.539	386.265
117.93	-82.9452	197.309	-424.284	#NULL!	#NULL!	462.427	-1.94401	151.5	449.201	#NULL!	#NULL!	278.032	-132.293	529.987	-640.684	#NULL!	#NULL!	-183.892	-227.01	#NULL!	#NULL!	#NULL!	#NULL!	#NULL!	#NULL!	193.836	-30.4096	#NULL!	#NULL!	-323.211	-280.212	-326.063	-535.16	#NULL!	#NULL!	556.6	-558.702	89.3749	-253.583	#NULL!	#NULL!	#NULL!	#NULL!	-213.23	-139.885	#NULL!	#NULL!	-282.499	385.913
111.783	-83.3092	192.39	-424.265	#NULL!	#NULL!	458.74	-1.92924	112.16	451.694	#NULL!	#NULL!	249.7	-130.95	471.463	-640.365	#NULL!	#NULL!	-106.874	-225.119	#NULL!	#NULL!	#NULL!	#NULL!	#NULL!	#NULL!	189.557	-30.4011	#NULL!	#NULL!	-318.932	-279.21	-329.273	-535.154	#NULL!	#NULL!	662.666	-556.591	86.9108	-254.743	#NULL!	#NULL!	#NULL!	#NULL!	-216.924	-141.045	#NULL!	#NULL!	-290.542	388.288
100.721	-83.2649	187.471	-424.245	#NULL!	#NULL!	451.365	-1.89972	150.91	453.874	#NULL!	#NULL!	237.379	-130.877	467.759	-641.52	#NULL!	#NULL!	-110.577	-226.271	#NULL!	#NULL!	#NULL!	#NULL!	#NULL!	#NULL!	185.278	-30.3926	#NULL!	#NULL!	-238.769	-276.405	-336.761	-535.139	#NULL!	#NULL!	580.037	-556.43	93.0771	-248.556	#NULL!	#NULL!	#NULL!	#NULL!	-221.231	-139.885	#NULL!	#NULL!	-263.263	390.414
97.0334	-83.2501	183.782	-424.23	#NULL!	#NULL!	83.8676	0.737509	112.185	456.364	#NULL!	#NULL!	364.297	-129.282	454.829	-640.275	#NULL!	#NULL!	-180.375	-221.942	#NULL!	#NULL!	#NULL!	#NULL!	#NULL!	#NULL!	180.999	-30.3841	#NULL!	#NULL!	-243.043	-276.392	-274.704	-533.231	#NULL!	#NULL!	575.104	-556.42	89.3813	-250.103	#NULL!	#NULL!	#NULL!	#NULL!	-197.218	-134.858	#NULL!	#NULL!	-268.847	389.294
107.491	-80.9605	164.118	-421.816	#NULL!	#NULL!	54.3691	0.855621	150.314	457.379	#NULL!	#NULL!	335.343	-129.111	451.742	-641.433	#NULL!	#NULL!	-184.49	-223.483	#NULL!	#NULL!	#NULL!	#NULL!	#NULL!	#NULL!	172.44	-30.3671	#NULL!	#NULL!	-323.194	-276.154	-321.774	-532.799	#NULL!	#NULL!	570.17	-556.411	93.0849	-244.302	#NULL!	#NULL!	#NULL!	#NULL!	-203.373	-135.244	#NULL!	#NULL!	-284.952	390.566
178.174	-78.912	159.199	-421.796	#NULL!	#NULL!	49.4526	0.875306	113.433	459.862	#NULL!	#NULL!	273.122	-128.741	441.893	-640.205	#NULL!	#NULL!	-106.85	-220.422	#NULL!	#NULL!	#NULL!	#NULL!	#NULL!	#NULL!	159.603	-30.3416	#NULL!	#NULL!	-228.073	-274.407	-180.553	-531.386	#NULL!	#NULL!	550.438	-556.372	88.7766	-244.302	#NULL!	#NULL!	#NULL!	#NULL!	-207.682	-135.244	#NULL!	#NULL!	-272.543	393.183
121.635	-78.6856	155.504	-422.949	#NULL!	#NULL!	44.5362	0.894992	108.514	459.881	#NULL!	#NULL!	358.764	-126.901	576.205	-638.586	#NULL!	#NULL!	-110.54	-219.226	#NULL!	#NULL!	#NULL!	#NULL!	#NULL!	#NULL!	121.448	-29.9273	#NULL!	#NULL!	-316.778	-275.158	-184.833	-531.378	#NULL!	#NULL!	545.505	-556.363	91.8625	-239.661	#NULL!	#NULL!	#NULL!	#NULL!	-211.992	-136.405	#NULL!	#NULL!	-289.902	391.76
116.719	-78.6659	205.942	-419.649	#NULL!	#NULL!	19.9541	0.993418	118.463	480.857	#NULL!	#NULL!	340.893	-127.969	549.099	-638.439	#NULL!	#NULL!	-170.907	-217.693	#NULL!	#NULL!	#NULL!	#NULL!	#NULL!	#NULL!	117.876	-31.2744	#NULL!	#NULL!	-230.737	-272.37	-189.112	-531.37	#NULL!	#NULL!	540.572	-556.353	86.9387	-239.661	#NULL!	#NULL!	#NULL!	#NULL!	-216.916	-136.405	#NULL!	#NULL!	-279.966	395.553
111.802	-78.6462	201.023	-419.629	#NULL!	#NULL!	15.0377	1.0131	114.793	484.374	#NULL!	#NULL!	236.787	-126.177	544.17	-638.412	#NULL!	#NULL!	-175.835	-217.664	#NULL!	#NULL!	#NULL!	#NULL!	#NULL!	#NULL!	29.0871	-30.0824	#NULL!	#NULL!	-240.531	-272.003	-192.856	-531.362	#NULL!	#NULL!	535.639	-556.343	83.2459	-239.661	#NULL!	#NULL!	#NULL!	#NULL!	-197.21	-130.604	#NULL!	#NULL!	-285.545	395.206
103.2	-78.2232	196.104	-419.609	#NULL!	#NULL!	1.51752	1.06724	113.588	489.049	#NULL!	#NULL!	332.287	-124.395	510.897	-639.405	#NULL!	#NULL!	-179.531	-217.642	#NULL!	#NULL!	#NULL!	#NULL!	#NULL!	#NULL!	3.4119	-30.0314	#NULL!	#NULL!	-244.099	-273.345	-204.624	-531.339	#NULL!	#NULL!	531.322	-556.335	86.9473	-235.02	#NULL!	#NULL!	#NULL!	#NULL!	-202.134	-130.604	#NULL!	#NULL!	-294.012	395.652
97.0531	-78.5872	191.185	-419.59	#NULL!	#NULL!	-14.4658	-0.034527	112.382	493.724	#NULL!	#NULL!	269.45	-124.022	539.257	-636.035	#NULL!	#NULL!	-147.491	-216.658	#NULL!	#NULL!	#NULL!	#NULL!	#NULL!	#NULL!	176.724	-29.36	#NULL!	#NULL!	-309.284	-272.136	-257.044	-531.235	#NULL!	#NULL!	657.738	-554.263	82.0235	-235.02	#NULL!	#NULL!	#NULL!	#NULL!	-206.442	-130.604	#NULL!	#NULL!	-267.56	397.784
91.532	-76.2335	186.266	-419.57	#NULL!	#NULL!	-19.3822	-0.0148416	124.717	500.679	#NULL!	#NULL!	356.941	-122.194	534.328	-636.009	#NULL!	#NULL!	-170.88	-212.605	#NULL!	#NULL!	#NULL!	#NULL!	#NULL!	#NULL!	168.17	-28.3274	#NULL!	#NULL!	-312.495	-273.142	-271.486	-531.206	#NULL!	#NULL!	651.572	-554.251	79.5594	-236.18	#NULL!	#NULL!	#NULL!	#NULL!	-210.753	-131.764	#NULL!	#NULL!	-272.526	396.274
174.506	-74.2342	166.602	-417.156	#NULL!	#NULL!	78.961	3.08868	122.282	505.359	#NULL!	#NULL!	352.628	-122.168	529.4	-635.982	#NULL!	#NULL!	-175.817	-214.141	#NULL!	#NULL!	#NULL!	#NULL!	#NULL!	#NULL!	163.891	-28.3189	#NULL!	#NULL!	-323.182	-273.11	-296.092	-531.157	#NULL!	#NULL!	646.638	-554.241	83.6741	-229.993	#NULL!	#NULL!	#NULL!	#NULL!	-194.739	-125.576	#NULL!	#NULL!	-277.463	399.785
170.819	-74.2195	161.683	-417.136	#NULL!	#NULL!	74.0446	3.10837	122.307	510.029	#NULL!	#NULL!	347.084	-122.135	440.69	-635.499	#NULL!	#NULL!	-179.513	-214.119	#NULL!	#NULL!	#NULL!	#NULL!	#NULL!	#NULL!	155.867	-28.3029	#NULL!	#NULL!	-234.467	-269.992	-300.371	-531.149	#NULL!	#NULL!	641.705	-554.232	79.568	-231.54	#NULL!	#NULL!	#NULL!	#NULL!	-200.894	-125.963	#NULL!	#NULL!	-282.421	399.82
115.509	-73.998	157.994	-417.122	#NULL!	#NULL!	69.1282	3.12805	117.388	510.049	#NULL!	#NULL!	337.221	-123.251	436.993	-635.479	#NULL!	#NULL!	-79.6892	-210.015	#NULL!	#NULL!	#NULL!	#NULL!	#NULL!	#NULL!	148.913	-28.2891	#NULL!	#NULL!	-319.967	-271.09	-304.65	-531.14	#NULL!	#NULL!	636.772	-554.222	88.1961	-225.352	#NULL!	#NULL!	#NULL!	#NULL!	-205.818	-125.963	#NULL!	#NULL!	-287.378	399.855
110.593	-73.9783	128.48	-417.003	#NULL!	#NULL!	64.2117	3.14774	113.692	508.896	#NULL!	#NULL!	329.219	-122.029	575.002	-633.881	#NULL!	#NULL!	-165.929	-208.329	#NULL!	#NULL!	#NULL!	#NULL!	#NULL!	#NULL!	0.206748	-29.0094	#NULL!	#NULL!	-315.145	-268.06	-308.93	-531.131	#NULL!	#NULL!	631.839	-554.213	83.2716	-225.739	#NULL!	#NULL!	#NULL!	#NULL!	-216.899	-127.123	#NULL!	#NULL!	-292.335	399.889
105.677	-73.9586	124.791	-416.988	#NULL!	#NULL!	59.2953	3.16742	123.555	513.527	#NULL!	#NULL!	262.07	-121.63	572.53	-635.042	#NULL!	#NULL!	-169.626	-208.307	#NULL!	#NULL!	#NULL!	#NULL!	#NULL!	#NULL!	-15.8403	-28.9775	#NULL!	#NULL!	-232.314	-266.278	-313.213	-532.139	#NULL!	#NULL!	626.906	-554.203	93.1257	-222.258	#NULL!	#NULL!	#NULL!	#NULL!	-193.5	-121.322	#NULL!	#NULL!	-296.053	399.916
100.76	-73.939	203.507	-414.969	#NULL!	#NULL!	39.6247	2.08042	116.176	513.556	#NULL!	#NULL!	259.599	-122.79	549.131	-633.348	#NULL!	#NULL!	-142.495	-203.771	#NULL!	#NULL!	#NULL!	#NULL!	#NULL!	#NULL!	-19.0497	-28.9712	#NULL!	#NULL!	-235.524	-267.283	-328.186	-531.093	#NULL!	#NULL!	621.973	-554.194	88.204	-221.098	#NULL!	#NULL!	#NULL!	#NULL!	-198.424	-121.322	#NULL!	#NULL!	-265.677	402.02
95.8437	-73.9193	198.588	-414.949	#NULL!	#NULL!	34.7083	2.10011	159.937	533.229	#NULL!	#NULL!	233.732	-121.462	542.968	-633.706	#NULL!	#NULL!	-165.905	-203.632	#NULL!	#NULL!	#NULL!	#NULL!	#NULL!	#NULL!	185.291	-27.3457	#NULL!	#NULL!	-303.916	-266.065	-332.465	-531.085	#NULL!	#NULL!	617.04	-554.184	83.2802	-221.098	#NULL!	#NULL!	#NULL!	#NULL!	-200.888	-122.482	#NULL!	#NULL!	-271.254	402.059
90.9387	-71.1795	193.669	-414.93	#NULL!	#NULL!	29.7968	3.28553	123.66	533.374	#NULL!	#NULL!	325.331	-119.266	455.489	-633.23	#NULL!	#NULL!	-169.601	-203.61	#NULL!	#NULL!	#NULL!	#NULL!	#NULL!	#NULL!	180.481	-26.3206	#NULL!	#NULL!	-301.77	-264.042	-335.679	-532.094	#NULL!	#NULL!	612.107	-554.174	79.5873	-221.098	#NULL!	#NULL!	#NULL!	#NULL!	-207.656	-121.322	#NULL!	#NULL!	-277.435	404.807
86.0207	-71.5484	188.75	-414.91	#NULL!	#NULL!	24.8804	3.30522	116.281	533.404	#NULL!	#NULL!	319.984	-120.8	536.822	-631.323	#NULL!	#NULL!	-83.3489	-202.948	#NULL!	#NULL!	#NULL!	#NULL!	#NULL!	#NULL!	172.457	-26.3046	#NULL!	#NULL!	-311.388	-264.013	-197.66	-528.983	#NULL!	#NULL!	608.404	-555.326	85.7507	-216.457	#NULL!	#NULL!	#NULL!	#NULL!	-192.876	-116.681	#NULL!	#NULL!	-282.401	403.296
74.3442	-71.5017	184.446	-414.893	#NULL!	#NULL!	83.8889	5.78906	159.962	537.899	#NULL!	#NULL!	315.062	-119.596	531.894	-631.296	#NULL!	#NULL!	-103.876	-201.261	#NULL!	#NULL!	#NULL!	#NULL!	#NULL!	#NULL!	159.62	-26.2791	#NULL!	#NULL!	-314.598	-265.018	-319.619	-529.079	#NULL!	#NULL!	565.242	-554.083	81.4423	-216.457	#NULL!	#NULL!	#NULL!	#NULL!	-199.645	-116.295	#NULL!	#NULL!	-292.309	404.525
173.297	-69.5663	166.627	-412.486	#NULL!	#NULL!	54.3838	4.35285	116.3	536.906	#NULL!	#NULL!	354.495	-118.656	528.19	-632.451	#NULL!	#NULL!	-140.013	-200.263	#NULL!	#NULL!	#NULL!	#NULL!	#NULL!	#NULL!	144.644	-25.9108	#NULL!	#NULL!	-234.969	-262.211	-323.898	-529.071	#NULL!	#NULL!	560.309	-554.074	89.4521	-211.817	#NULL!	#NULL!	#NULL!	#NULL!	-207.032	-116.681	#NULL!	#NULL!	-296.647	404.555
168.381	-69.5466	161.708	-412.466	#NULL!	#NULL!	76.5241	8.15008	123.094	542.716	#NULL!	#NULL!	350.799	-118.634	510.948	-631.182	#NULL!	#NULL!	-160.95	-198.573	#NULL!	#NULL!	#NULL!	#NULL!	#NULL!	#NULL!	139.294	-26.2388	#NULL!	#NULL!	-295.349	-262.032	-180.178	-526.986	#NULL!	#NULL!	555.376	-554.064	84.5283	-211.817	#NULL!	#NULL!	#NULL!	#NULL!	-175.634	-112.041	#NULL!	#NULL!	-265.031	406.651
113.071	-69.3252	124.816	-412.318	#NULL!	#NULL!	70.9915	7.78364	120.032	545.064	#NULL!	#NULL!	258.398	-116.912	451.192	-630.857	#NULL!	#NULL!	-166.497	-198.932	#NULL!	#NULL!	#NULL!	#NULL!	#NULL!	#NULL!	136.084	-26.2324	#NULL!	#NULL!	-308.173	-261.993	-183.75	-528.333	#NULL!	#NULL!	580.046	-551.794	80.2199	-211.817	#NULL!	#NULL!	#NULL!	#NULL!	-197.178	-113.201	#NULL!	#NULL!	-271.228	406.695
108.154	-69.3055	201.074	-409.9	#NULL!	#NULL!	66.6847	6.63512	124.963	547.379	#NULL!	#NULL!	227.595	-116.729	443.183	-630.813	#NULL!	#NULL!	-169.583	-200.088	#NULL!	#NULL!	#NULL!	#NULL!	#NULL!	#NULL!	126.456	-26.2133	#NULL!	#NULL!	-303.89	-259.977	-202.467	-527.28	#NULL!	#NULL!	575.113	-551.785	83.3059	-207.176	#NULL!	#NULL!	#NULL!	#NULL!	-202.102	-113.201	#NULL!	#NULL!	-300.352	406.899
103.238	-69.2858	194.923	-410.264	#NULL!	#NULL!	61.1587	7.82301	121.901	549.726	#NULL!	#NULL!	345.882	-116.257	438.255	-630.786	#NULL!	#NULL!	-101.8	-196.968	#NULL!	#NULL!	#NULL!	#NULL!	#NULL!	#NULL!	121.103	-27.2183	#NULL!	#NULL!	-312.444	-260.966	-257.027	-527.172	#NULL!	#NULL!	570.18	-551.775	78.3821	-207.176	#NULL!	#NULL!	#NULL!	#NULL!	-177.472	-107.4	#NULL!	#NULL!	-277.411	409.056
92.1859	-66.91	190.005	-410.245	#NULL!	#NULL!	103.573	9.98471	122.541	554.394	#NULL!	#NULL!	337.88	-115.035	570.103	-629.155	#NULL!	#NULL!	-105.484	-194.597	#NULL!	#NULL!	#NULL!	#NULL!	#NULL!	#NULL!	117.898	-26.1963	#NULL!	#NULL!	-223.731	-258.186	-274.679	-527.137	#NULL!	#NULL!	547.982	-551.346	85.7771	-202.148	#NULL!	#NULL!	#NULL!	#NULL!	-187.32	-107.4	#NULL!	#NULL!	-281.129	409.082
87.2695	-66.8904	185.085	-410.225	#NULL!	#NULL!	98.6562	10.0044	122.566	559.064	#NULL!	#NULL!	317.544	-116.088	551.614	-630.229	#NULL!	#NULL!	-133.206	-194.433	#NULL!	#NULL!	#NULL!	#NULL!	#NULL!	#NULL!	27.4994	-26.0167	#NULL!	#NULL!	-235.49	-259.166	-293.935	-527.099	#NULL!	#NULL!	541.815	-551.72	80.2371	-202.535	#NULL!	#NULL!	#NULL!	#NULL!	-182.391	-104.693	#NULL!	#NULL!	-294.142	409.173
82.353	-66.8707	180.167	-410.205	#NULL!	#NULL!	93.7398	10.0241	123.814	562.561	#NULL!	#NULL!	312.006	-114.881	546.693	-629.027	#NULL!	#NULL!	-158.464	-194.283	#NULL!	#NULL!	#NULL!	#NULL!	#NULL!	#NULL!	3.42465	-26.9845	#NULL!	#NULL!	-290.523	-257.988	-298.219	-528.106	#NULL!	#NULL!	536.881	-551.71	90.0933	-197.894	#NULL!	#NULL!	#NULL!	#NULL!	-203.32	-106.24	#NULL!	#NULL!	-268.103	411.309
71.9056	-66.8288	166.652	-407.816	#NULL!	#NULL!	88.8234	10.0438	132.477	573.034	#NULL!	#NULL!	307.688	-116.03	541.765	-629	#NULL!	#NULL!	-163.392	-194.254	#NULL!	#NULL!	#NULL!	#NULL!	#NULL!	#NULL!	167.117	-24.2628	#NULL!	#NULL!	-294.798	-257.975	-301.424	-527.084	#NULL!	#NULL!	531.948	-551.701	87.0138	-199.054	#NULL!	#NULL!	#NULL!	#NULL!	-162.691	-102.373	#NULL!	#NULL!	-272.447	410.18
164.708	-66.0347	161.733	-407.796	#NULL!	#NULL!	83.9069	10.0634	127.558	573.054	#NULL!	#NULL!	332.342	-113.828	519.587	-628.88	#NULL!	#NULL!	-167.095	-195.406	#NULL!	#NULL!	#NULL!	#NULL!	#NULL!	#NULL!	163.903	-25.272	#NULL!	#NULL!	-308.156	-257.935	-193.365	-525.267	#NULL!	#NULL!	527.632	-551.692	78.3993	-197.894	#NULL!	#NULL!	#NULL!	#NULL!	-166.387	-103.919	#NULL!	#NULL!	-298.467	411.522
114.32	-64.6671	158.043	-407.782	#NULL!	#NULL!	-4.58864	10.4178	165.091	577.573	#NULL!	#NULL!	304.01	-112.486	514.659	-628.853	#NULL!	#NULL!	-101.775	-192.271	#NULL!	#NULL!	#NULL!	#NULL!	#NULL!	#NULL!	155.351	-23.9009	#NULL!	#NULL!	-302.805	-255.922	-197.645	-525.259	#NULL!	#NULL!	658.981	-549.63	73.4797	-195.574	#NULL!	#NULL!	#NULL!	#NULL!	-187.311	-102.759	#NULL!	#NULL!	-279.864	413.709
109.403	-64.6475	125.455	-407.651	#NULL!	#NULL!	79.4117	12.8016	127.577	576.557	#NULL!	#NULL!	255.958	-112.2	455.519	-628.531	#NULL!	#NULL!	-104.227	-189.908	#NULL!	#NULL!	#NULL!	#NULL!	#NULL!	#NULL!	150	-24.2288	#NULL!	#NULL!	-224.787	-255.139	-262.368	-525.13	#NULL!	#NULL!	654.048	-549.62	91.9462	-194.414	#NULL!	#NULL!	#NULL!	#NULL!	-150.377	-100.052	#NULL!	#NULL!	-271.175	415.966
104.487	-64.6278	203.559	-405.24	#NULL!	#NULL!	74.079	11.2686	164.912	582.634	#NULL!	#NULL!	217.763	-111.973	433.341	-628.41	#NULL!	#NULL!	-132.565	-189.74	#NULL!	#NULL!	#NULL!	#NULL!	#NULL!	#NULL!	94.9053	-24.1194	#NULL!	#NULL!	-289.972	-253.931	-321.742	-525.012	#NULL!	#NULL!	649.115	-549.611	78.4078	-193.254	#NULL!	#NULL!	#NULL!	#NULL!	-177.459	-100.439	#NULL!	#NULL!	-276.133	416.001
100.185	-64.6106	197.408	-405.604	#NULL!	#NULL!	120.8	14.5788	126.39	584.734	#NULL!	#NULL!	338.514	-111.516	536.851	-626.624	#NULL!	#NULL!	-160.904	-189.571	#NULL!	#NULL!	#NULL!	#NULL!	#NULL!	#NULL!	84.7437	-23.7606	#NULL!	#NULL!	-294.247	-253.918	-176.24	-523.27	#NULL!	#NULL!	644.182	-549.601	69.7912	-193.254	#NULL!	#NULL!	#NULL!	#NULL!	-182.998	-100.439	#NULL!	#NULL!	-283.569	416.053
158.572	-63.6786	192.489	-405.585	#NULL!	#NULL!	115.883	14.5985	167.397	587.294	#NULL!	#NULL!	328.048	-110.28	531.923	-626.597	#NULL!	#NULL!	-164.6	-189.549	#NULL!	#NULL!	#NULL!	#NULL!	#NULL!	#NULL!	79.3932	-24.0885	#NULL!	#NULL!	-298.521	-253.905	-179.454	-524.279	#NULL!	#NULL!	639.248	-549.592	73.489	-190.547	#NULL!	#NULL!	#NULL!	#NULL!	-157.759	-98.1185	#NULL!	#NULL!	-297.208	414.99
84.8309	-62.2175	187.57	-405.565	#NULL!	#NULL!	110.967	14.6182	163.289	585.753	#NULL!	#NULL!	308.95	-110.166	510.361	-626.48	#NULL!	#NULL!	-99.2929	-188.763	#NULL!	#NULL!	#NULL!	#NULL!	#NULL!	#NULL!	69.2301	-24.0684	#NULL!	#NULL!	-306.002	-253.883	-188.008	-523.247	#NULL!	#NULL!	634.315	-549.582	73.4976	-185.906	#NULL!	#NULL!	#NULL!	#NULL!	-165.145	-98.1185	#NULL!	#NULL!	-300.919	416.175
79.9145	-62.1979	182.651	-405.545	#NULL!	#NULL!	106.05	14.6378	128.875	589.394	#NULL!	#NULL!	334.22	-107.968	450.598	-627.329	#NULL!	#NULL!	-160.885	-186.049	#NULL!	#NULL!	#NULL!	#NULL!	#NULL!	#NULL!	59.7816	-23.7111	#NULL!	#NULL!	-291.024	-249.869	-200.846	-523.221	#NULL!	#NULL!	629.382	-549.572	69.8019	-187.453	#NULL!	#NULL!	#NULL!	#NULL!	-146.677	-95.7981	#NULL!	#NULL!	-272.389	420.61
68.8476	-63.3193	178.955	-406.698	#NULL!	#NULL!	101.134	14.6575	126.409	588.236	#NULL!	#NULL!	321.283	-107.891	441.98	-626.107	#NULL!	#NULL!	-152.858	-182.574	#NULL!	#NULL!	#NULL!	#NULL!	#NULL!	#NULL!	46.2294	-24.0227	#NULL!	#NULL!	-295.298	-249.856	-257.545	-523.109	#NULL!	#NULL!	624.449	-549.563	78.4293	-181.652	#NULL!	#NULL!	#NULL!	#NULL!	-169.654	-95.4114	#NULL!	#NULL!	-278.585	420.654
108.189	-61.1453	166.678	-402.757	#NULL!	#NULL!	96.2177	14.6772	169.463	590.399	#NULL!	#NULL!	302.802	-107.781	437.052	-626.081	#NULL!	#NULL!	-137.451	-181.491	#NULL!	#NULL!	#NULL!	#NULL!	#NULL!	#NULL!	144.655	-23.2025	#NULL!	#NULL!	-299.573	-249.844	-266.103	-523.091	#NULL!	#NULL!	619.516	-549.553	73.5055	-181.652	#NULL!	#NULL!	#NULL!	#NULL!	-177.452	-96.9583	#NULL!	#NULL!	-282.31	419.521
103.277	-59.9599	160.528	-403.122	#NULL!	#NULL!	91.3013	14.6969	127.669	594.069	#NULL!	#NULL!	251.054	-107.474	428.43	-625.642	#NULL!	#NULL!	-80.7627	-179.479	#NULL!	#NULL!	#NULL!	#NULL!	#NULL!	#NULL!	140.38	-22.1784	#NULL!	#NULL!	-302.783	-250.849	-274.127	-523.076	#NULL!	#NULL!	614.583	-549.544	69.8126	-181.652	#NULL!	#NULL!	#NULL!	#NULL!	-181.145	-96.9583	#NULL!	#NULL!	-299.654	420.801
98.3609	-59.9402	156.223	-403.104	#NULL!	#NULL!	86.3799	13.5508	127.079	598.741	#NULL!	#NULL!	238.733	-107.401	422.883	-626.003	#NULL!	#NULL!	-153.45	-177.874	#NULL!	#NULL!	#NULL!	#NULL!	#NULL!	#NULL!	136.101	-22.1699	#NULL!	#NULL!	-292.074	-245.469	-291.779	-523.04	#NULL!	#NULL!	610.883	-549.536	80.9005	-176.624	#NULL!	#NULL!	#NULL!	#NULL!	-195.915	-95.7981	#NULL!	#NULL!	-272.36	425.632
83.6215	-57.5496	124.25	-402.976	#NULL!	#NULL!	125.726	16.8906	127.719	603.409	#NULL!	#NULL!	223.948	-107.313	567.661	-625.617	#NULL!	#NULL!	-88.1248	-173.565	#NULL!	#NULL!	#NULL!	#NULL!	#NULL!	#NULL!	131.822	-22.1614	#NULL!	#NULL!	-297.419	-245.792	-302.477	-523.019	#NULL!	#NULL!	589.917	-549.496	74.745	-177.011	#NULL!	#NULL!	#NULL!	#NULL!	-142.982	-94.6379	#NULL!	#NULL!	-281.862	425.699
78.7051	-57.53	206.041	-400.969	#NULL!	#NULL!	135.569	19.1827	178.145	604.374	#NULL!	#NULL!	211.621	-108.414	545.49	-624.322	#NULL!	#NULL!	-152.81	-173.18	#NULL!	#NULL!	#NULL!	#NULL!	#NULL!	#NULL!	127.543	-22.1529	#NULL!	#NULL!	-301.159	-245.78	-197.628	-521.196	#NULL!	#NULL!	584.984	-549.486	69.8212	-177.011	#NULL!	#NULL!	#NULL!	#NULL!	-162.677	-94.6379	#NULL!	#NULL!	-297.149	425.42
142.014	-55.4519	201.122	-400.949	#NULL!	#NULL!	130.652	19.2024	128.967	606.906	#NULL!	#NULL!	195.61	-107.145	540.562	-624.295	#NULL!	#NULL!	-80.104	-171.264	#NULL!	#NULL!	#NULL!	#NULL!	#NULL!	#NULL!	116.845	-22.1317	#NULL!	#NULL!	-289.92	-241.417	-253.257	-521.086	#NULL!	#NULL!	565.252	-549.448	67.3571	-178.171	#NULL!	#NULL!	#NULL!	#NULL!	-167.596	-92.3175	#NULL!	#NULL!	-301.487	425.45
103.292	-56.4626	196.203	-400.93	#NULL!	#NULL!	120.82	19.2418	132.072	612.731	#NULL!	#NULL!	308.358	-105.466	519.617	-624.181	#NULL!	#NULL!	-88.1004	-168.868	#NULL!	#NULL!	#NULL!	#NULL!	#NULL!	#NULL!	108.821	-22.1157	#NULL!	#NULL!	-295.264	-241.739	-262.886	-521.067	#NULL!	#NULL!	560.319	-549.438	75.3691	-172.37	#NULL!	#NULL!	#NULL!	#NULL!	-171.289	-92.3175	#NULL!	#NULL!	-305.192	427.794
98.9952	-55.2797	191.284	-400.91	#NULL!	#NULL!	115.903	19.2614	132.712	617.399	#NULL!	#NULL!	298.502	-105.407	514.688	-624.154	#NULL!	#NULL!	-152.175	-169.662	#NULL!	#NULL!	#NULL!	#NULL!	#NULL!	#NULL!	91.171	-21.7421	#NULL!	#NULL!	-298.475	-242.745	-270.016	-520.714	#NULL!	#NULL!	555.385	-549.428	71.0586	-173.53	#NULL!	#NULL!	#NULL!	#NULL!	-158.353	-86.5166	#NULL!	#NULL!	-269.856	430.25
74.4131	-55.1812	186.365	-400.89	#NULL!	#NULL!	110.987	19.2811	135.196	622.059	#NULL!	#NULL!	243.674	-105.082	534.419	-621.52	#NULL!	#NULL!	-80.0796	-166.567	#NULL!	#NULL!	#NULL!	#NULL!	#NULL!	#NULL!	74.0542	-21.7081	#NULL!	#NULL!	-205.491	-240.992	-295.514	-521.002	#NULL!	#NULL!	594.856	-546.801	66.1347	-173.53	#NULL!	#NULL!	#NULL!	#NULL!	-171.281	-87.6768	#NULL!	#NULL!	-275.435	429.903
78.7248	-52.867	181.446	-400.87	#NULL!	#NULL!	106.07	19.3008	131.507	622.074	#NULL!	#NULL!	207.943	-104.87	530.713	-623.066	#NULL!	#NULL!	-127.515	-166.285	#NULL!	#NULL!	#NULL!	#NULL!	#NULL!	#NULL!	65.4957	-21.6911	#NULL!	#NULL!	-283.492	-237.716	-319.585	-520.954	#NULL!	#NULL!	580.057	-546.772	74.7622	-167.73	#NULL!	#NULL!	#NULL!	#NULL!	-162.657	-84.1963	#NULL!	#NULL!	-281.631	429.947
97.1712	-50.6093	176.541	-398.127	#NULL!	#NULL!	102.378	18.1498	137.68	626.719	#NULL!	#NULL!	329.926	-104.42	510.999	-622.959	#NULL!	#NULL!	-88.076	-164.171	#NULL!	#NULL!	#NULL!	#NULL!	#NULL!	#NULL!	42.4936	-21.984	#NULL!	#NULL!	-287.767	-237.703	-324.399	-520.944	#NULL!	#NULL!	573.889	-547.147	69.8383	-167.73	#NULL!	#NULL!	#NULL!	#NULL!	-166.966	-84.1963	#NULL!	#NULL!	-285.976	428.818
93.4839	-50.5946	170.39	-398.491	#NULL!	#NULL!	140.495	21.4945	132.761	626.739	#NULL!	#NULL!	325.004	-103.216	487.597	-621.657	#NULL!	#NULL!	-151.529	-163.794	#NULL!	#NULL!	#NULL!	#NULL!	#NULL!	#NULL!	29.1211	-21.9574	#NULL!	#NULL!	-292.046	-238.705	-171.944	-519.216	#NULL!	#NULL!	568.956	-547.137	65.53	-167.73	#NULL!	#NULL!	#NULL!	#NULL!	-157.729	-81.4891	#NULL!	#NULL!	-298.982	430.068
73.8182	-50.5158	165.471	-398.471	#NULL!	#NULL!	125.746	21.5536	136.475	631.394	#NULL!	#NULL!	316.379	-103.165	443.244	-621.024	#NULL!	#NULL!	-79.4392	-161.874	#NULL!	#NULL!	#NULL!	#NULL!	#NULL!	#NULL!	24.8419	-21.9489	#NULL!	#NULL!	-281.338	-233.664	-175.158	-520.225	#NULL!	#NULL!	550.458	-546.715	73.5398	-163.089	#NULL!	#NULL!	#NULL!	#NULL!	-165.113	-80.7157	#NULL!	#NULL!	-304.544	432.811
68.9018	-50.4961	160.552	-398.452	#NULL!	#NULL!	145.423	24.1949	132.171	631.411	#NULL!	#NULL!	311.451	-103.136	437.081	-621.382	#NULL!	#NULL!	-127.491	-161.589	#NULL!	#NULL!	#NULL!	#NULL!	#NULL!	#NULL!	-5.64741	-21.8884	#NULL!	#NULL!	-285.612	-233.651	-184.782	-519.191	#NULL!	#NULL!	544.291	-547.089	68.616	-163.089	#NULL!	#NULL!	#NULL!	#NULL!	-168.804	-79.5555	#NULL!	#NULL!	-271.071	434.508
55.3865	-49.2763	156.863	-398.437	#NULL!	#NULL!	135.59	24.2343	178.305	634.729	#NULL!	#NULL!	302.828	-102.693	432.769	-621.358	#NULL!	#NULL!	-88.0517	-159.475	#NULL!	#NULL!	#NULL!	#NULL!	#NULL!	#NULL!	155.362	-21.1925	#NULL!	#NULL!	-200.105	-230.862	-247.9	-519.065	#NULL!	#NULL!	539.358	-547.079	64.3076	-163.089	#NULL!	#NULL!	#NULL!	#NULL!	-131.255	-77.2351	#NULL!	#NULL!	-273.556	433.367
130.991	-46.0817	120.585	-398.291	#NULL!	#NULL!	129.443	23.8703	174.019	638.249	#NULL!	#NULL!	292.972	-102.635	428.449	-622.509	#NULL!	#NULL!	-148.011	-158.727	#NULL!	#NULL!	#NULL!	#NULL!	#NULL!	#NULL!	124.877	-20.1164	#NULL!	#NULL!	-224.685	-230.789	-291.762	-518.978	#NULL!	#NULL!	534.424	-547.07	60.0036	-160.768	#NULL!	#NULL!	#NULL!	#NULL!	-150.334	-76.8484	#NULL!	#NULL!	-279.744	434.955
93.5036	-45.9316	203.6	-397.457	#NULL!	#NULL!	121.251	24.2917	132.208	638.416	#NULL!	#NULL!	287.425	-102.993	423.521	-622.482	#NULL!	#NULL!	-152.126	-160.268	#NULL!	#NULL!	#NULL!	#NULL!	#NULL!	#NULL!	112.574	-20.0919	#NULL!	#NULL!	-281.319	-229.267	-299.785	-518.962	#NULL!	#NULL!	529.491	-547.06	62.4698	-158.448	#NULL!	#NULL!	#NULL!	#NULL!	-155.261	-78.3953	#NULL!	#NULL!	-285.943	434.612
89.2017	-45.9144	198.687	-396.269	#NULL!	#NULL!	117.147	22.7538	177.118	642.906	#NULL!	#NULL!	284.339	-104.149	546.754	-619.238	#NULL!	#NULL!	-80.653	-158.344	#NULL!	#NULL!	#NULL!	#NULL!	#NULL!	#NULL!	97.5983	-19.7236	#NULL!	#NULL!	-284.531	-230.611	-193.332	-517.142	#NULL!	#NULL!	524.558	-547.051	61.2481	-153.421	#NULL!	#NULL!	#NULL!	#NULL!	-131.864	-73.7546	#NULL!	#NULL!	-288.428	433.471
73.833	-47.0186	194.383	-396.252	#NULL!	#NULL!	155.275	28.8185	173.429	642.921	#NULL!	#NULL!	238.757	-102.704	540.591	-619.596	#NULL!	#NULL!	-84.3371	-155.974	#NULL!	#NULL!	#NULL!	#NULL!	#NULL!	#NULL!	84.755	-21.0523	#NULL!	#NULL!	-220.398	-227.758	-196.541	-517.136	#NULL!	#NULL!	658.99	-544.994	73.5619	-151.1	#NULL!	#NULL!	#NULL!	#NULL!	-149.096	-72.5944	#NULL!	#NULL!	-309.49	434.778
68.9165	-46.9989	188.843	-397.397	#NULL!	#NULL!	149.128	28.4545	135.307	643.074	#NULL!	#NULL!	279.429	-100.597	527.041	-619.13	#NULL!	#NULL!	-91.7296	-155.93	#NULL!	#NULL!	#NULL!	#NULL!	#NULL!	#NULL!	80.4758	-21.0438	#NULL!	#NULL!	-201.153	-225.786	-265.543	-516.999	#NULL!	#NULL!	654.057	-544.985	67.4065	-151.487	#NULL!	#NULL!	#NULL!	#NULL!	-153.404	-72.5944	#NULL!	#NULL!	-304.526	435.902
64.6196	-45.8159	183.93	-396.21	#NULL!	#NULL!	144.212	28.4742	131.612	641.921	#NULL!	#NULL!	204.265	-101.325	520.878	-619.488	#NULL!	#NULL!	-143.477	-155.623	#NULL!	#NULL!	#NULL!	#NULL!	#NULL!	#NULL!	59.084	-19.9857	#NULL!	#NULL!	-277.029	-225.56	-296.037	-517.954	#NULL!	#NULL!	649.124	-544.975	54.6873	-151.1	#NULL!	#NULL!	#NULL!	#NULL!	-147.855	-67.5669	#NULL!	#NULL!	-274.769	438.011
126.291	-43.3428	179.023	-393.856	#NULL!	#NULL!	139.295	28.4939	179.605	647.956	#NULL!	#NULL!	317.63	-99.6501	516.566	-619.465	#NULL!	#NULL!	-148.406	-155.594	#NULL!	#NULL!	#NULL!	#NULL!	#NULL!	#NULL!	54.8048	-19.9772	#NULL!	#NULL!	-281.304	-225.547	-317.428	-516.896	#NULL!	#NULL!	644.191	-544.966	61.2538	-150.327	#NULL!	#NULL!	#NULL!	#NULL!	-153.395	-67.9537	#NULL!	#NULL!	-279.101	439.2
58.4839	-43.4598	174.104	-393.836	#NULL!	#NULL!	134.379	28.5136	174.069	647.588	#NULL!	#NULL!	312.701	-99.6208	492.533	-620.509	#NULL!	#NULL!	-79.3539	-145.436	#NULL!	#NULL!	#NULL!	#NULL!	#NULL!	#NULL!	50.5256	-19.9687	#NULL!	#NULL!	-285.583	-226.549	-320.642	-517.905	#NULL!	#NULL!	639.258	-544.956	-626.849	-150.327	#NULL!	#NULL!	#NULL!	#NULL!	-157.704	-67.9537	#NULL!	#NULL!	-284.678	439.239
52.948	-44.6034	169.185	-393.816	#NULL!	#NULL!	130.077	28.5308	137.791	647.734	#NULL!	#NULL!	307.779	-98.4174	534.446	-617.213	#NULL!	#NULL!	-83.0501	-145.414	#NULL!	#NULL!	#NULL!	#NULL!	#NULL!	#NULL!	46.2464	-19.9602	#NULL!	#NULL!	-218.248	-224.72	-325.452	-516.88	#NULL!	#NULL!	634.325	-544.946	-639.159	-150.327	#NULL!	#NULL!	#NULL!	#NULL!	-140.466	-65.6333	#NULL!	#NULL!	-289.015	439.27
115.647	-41.3572	164.266	-393.796	#NULL!	#NULL!	125.77	27.3823	134.096	646.581	#NULL!	#NULL!	302.851	-98.3881	496.243	-618.179	#NULL!	#NULL!	-92.9069	-145.355	#NULL!	#NULL!	#NULL!	#NULL!	#NULL!	#NULL!	37.6838	-20.9588	#NULL!	#NULL!	-273.815	-223.54	-168.718	-515.16	#NULL!	#NULL!	629.392	-544.937	-672.395	-150.327	#NULL!	#NULL!	#NULL!	#NULL!	-171.649	-65.2466	#NULL!	#NULL!	-307.605	439.4
91.0601	-42.4245	159.347	-393.777	#NULL!	#NULL!	122.083	27.397	184.546	652.216	#NULL!	#NULL!	298.538	-98.3625	488.851	-618.139	#NULL!	#NULL!	-112.62	-145.238	#NULL!	#NULL!	#NULL!	#NULL!	#NULL!	#NULL!	33.4088	-19.9347	#NULL!	#NULL!	-195.079	-221.407	-184.765	-515.128	#NULL!	#NULL!	624.459	-544.927	74.8093	-142.206	#NULL!	#NULL!	#NULL!	#NULL!	-130.614	-63.3129	#NULL!	#NULL!	-312.563	439.435
86.1486	-41.2391	155.658	-393.762	#NULL!	#NULL!	170.044	33.4224	179.627	652.236	#NULL!	#NULL!	292.988	-99.5037	445.735	-616.73	#NULL!	#NULL!	-138.492	-144.693	#NULL!	#NULL!	#NULL!	#NULL!	#NULL!	#NULL!	21.1061	-19.9103	#NULL!	#NULL!	-200.602	-221.729	-189.044	-515.12	#NULL!	#NULL!	619.525	-544.918	71.1143	-143.366	#NULL!	#NULL!	#NULL!	#NULL!	-145.385	-62.9262	#NULL!	#NULL!	-294.579	441.627
64.0198	-42.3162	121.219	-394.791	#NULL!	#NULL!	163.897	33.0584	175.323	652.254	#NULL!	#NULL!	288.06	-99.4745	440.807	-616.703	#NULL!	#NULL!	-142.197	-146.237	#NULL!	#NULL!	#NULL!	#NULL!	#NULL!	#NULL!	10.2312	-19.5501	#NULL!	#NULL!	-268.997	-221.525	-245.743	-515.007	#NULL!	#NULL!	614.592	-544.908	67.4215	-143.366	#NULL!	#NULL!	#NULL!	#NULL!	-150.311	-64.4731	#NULL!	#NULL!	-279.694	443.84
111.562	-38.6207	197.482	-391.594	#NULL!	#NULL!	158.981	33.0781	137.816	652.404	#NULL!	#NULL!	283.753	-98.2747	435.878	-616.676	#NULL!	#NULL!	-79.3295	-140.739	#NULL!	#NULL!	#NULL!	#NULL!	#NULL!	#NULL!	3.98929	-19.8763	#NULL!	#NULL!	-279.149	-221.495	-287.466	-514.924	#NULL!	#NULL!	609.659	-544.898	57.576	-142.206	#NULL!	#NULL!	#NULL!	#NULL!	-125.688	-62.1527	#NULL!	#NULL!	-284.032	443.87
83.0857	-38.8953	195.016	-392.752	#NULL!	#NULL!	154.064	33.0978	187.03	656.877	#NULL!	#NULL!	233.847	-99.1526	431.566	-616.652	#NULL!	#NULL!	-83.0318	-141.891	#NULL!	#NULL!	#NULL!	#NULL!	#NULL!	#NULL!	-0.829056	-20.8823	#NULL!	#NULL!	-193.104	-217.693	-291.749	-515.931	#NULL!	#NULL!	605.343	-544.89	53.881	-143.366	#NULL!	#NULL!	#NULL!	#NULL!	-168.772	-62.1527	#NULL!	#NULL!	-288.37	443.901
55.4308	-38.7846	183.957	-391.151	#NULL!	#NULL!	149.148	33.1175	182.111	656.896	#NULL!	#NULL!	207.98	-97.8248	548.013	-614.937	#NULL!	#NULL!	-92.8886	-141.833	#NULL!	#NULL!	#NULL!	#NULL!	#NULL!	#NULL!	138.254	-19.1273	#NULL!	#NULL!	-197.379	-217.68	-298.698	-514.902	#NULL!	#NULL!	587.461	-544.469	59.2265	-137.178	#NULL!	#NULL!	#NULL!	#NULL!	-136.76	-58.6722	#NULL!	#NULL!	-297.045	443.962
50.5144	-38.7649	191.345	-389.235	#NULL!	#NULL!	144.232	33.1372	177.192	656.916	#NULL!	#NULL!	198.123	-97.7663	543.085	-614.91	#NULL!	#NULL!	-112.602	-141.715	#NULL!	#NULL!	#NULL!	#NULL!	#NULL!	#NULL!	133.974	-19.1188	#NULL!	#NULL!	-216.081	-217.624	-308.86	-514.543	#NULL!	#NULL!	562.795	-544.421	68.6717	-132.924	#NULL!	#NULL!	#NULL!	#NULL!	-142.917	-59.8324	#NULL!	#NULL!	-304.065	444.397
77.5646	-36.5417	176.588	-389.176	#NULL!	#NULL!	140.539	31.9862	173.503	656.931	#NULL!	#NULL!	276.373	-95.8825	538.157	-614.883	#NULL!	#NULL!	-136.004	-140.011	#NULL!	#NULL!	#NULL!	#NULL!	#NULL!	#NULL!	130.234	-18.0957	#NULL!	#NULL!	-265.774	-217.476	-313.676	-514.872	#NULL!	#NULL!	556.628	-544.795	63.7479	-132.924	#NULL!	#NULL!	#NULL!	#NULL!	-147.841	-59.8324	#NULL!	#NULL!	-311.917	444.066
73.8773	-36.5269	171.669	-389.156	#NULL!	#NULL!	136.852	32.001	138.252	657.461	#NULL!	#NULL!	227.705	-95.5935	531.996	-614.85	#NULL!	#NULL!	-141.55	-140.369	#NULL!	#NULL!	#NULL!	#NULL!	#NULL!	#NULL!	121.141	-18.0777	#NULL!	#NULL!	-271.652	-217.459	-264.456	-512.938	#NULL!	#NULL!	599.798	-542.561	59.4396	-132.924	#NULL!	#NULL!	#NULL!	#NULL!	-130.601	-56.3518	#NULL!	#NULL!	-315.641	442.933
108.917	-34.3357	167.365	-389.139	#NULL!	#NULL!	448.455	36.5821	189.514	661.537	#NULL!	#NULL!	305.333	-94.8802	519.675	-614.783	#NULL!	#NULL!	-78.8923	-135.653	#NULL!	#NULL!	#NULL!	#NULL!	#NULL!	#NULL!	116.862	-18.0692	#NULL!	#NULL!	-275.926	-217.446	-322.76	-512.823	#NULL!	#NULL!	594.865	-542.552	68.6803	-128.283	#NULL!	#NULL!	#NULL!	#NULL!	-168.145	-56.3518	#NULL!	#NULL!	-282.147	448.493
54.2214	-34.1167	161.825	-390.284	#NULL!	#NULL!	188.499	37.623	184.595	661.557	#NULL!	#NULL!	299.179	-93.6694	514.747	-614.756	#NULL!	#NULL!	-140.294	-135.68	#NULL!	#NULL!	#NULL!	#NULL!	#NULL!	#NULL!	90.6516	-18.0171	#NULL!	#NULL!	-278.068	-218.454	-165.491	-511.104	#NULL!	#NULL!	580.065	-542.523	63.7565	-128.283	#NULL!	#NULL!	#NULL!	#NULL!	-134.29	-54.0314	#NULL!	#NULL!	-287.724	448.532
49.305	-34.097	156.912	-389.097	#NULL!	#NULL!	183.583	37.6427	180.9	660.404	#NULL!	#NULL!	296.709	-94.829	509.833	-612.379	#NULL!	#NULL!	-127.344	-133.409	#NULL!	#NULL!	#NULL!	#NULL!	#NULL!	#NULL!	87.9729	-19.0274	#NULL!	#NULL!	-192.553	-213.636	-168.701	-511.097	#NULL!	#NULL!	575.132	-542.513	58.8327	-128.283	#NULL!	#NULL!	#NULL!	#NULL!	-162.602	-54.0314	#NULL!	#NULL!	-295.786	447.43
105.239	-31.9894	152.608	-389.079	#NULL!	#NULL!	178.666	37.6624	140.325	661.734	#NULL!	#NULL!	280.691	-94.7339	445.764	-612.03	#NULL!	#NULL!	-78.0486	-131.353	#NULL!	#NULL!	#NULL!	#NULL!	#NULL!	#NULL!	75.6744	-17.9874	#NULL!	#NULL!	-197.362	-213.621	-184.752	-512.081	#NULL!	#NULL!	570.199	-542.504	53.9089	-128.283	#NULL!	#NULL!	#NULL!	#NULL!	-115.206	-51.7111	#NULL!	#NULL!	-301.356	448.628
72.6678	-31.859	196.277	-386.92	#NULL!	#NULL!	173.75	37.682	136.635	661.749	#NULL!	#NULL!	221.557	-93.2086	440.836	-612.004	#NULL!	#NULL!	-80.5189	-132.512	#NULL!	#NULL!	#NULL!	#NULL!	#NULL!	#NULL!	71.9259	-18.9956	#NULL!	#NULL!	-264.688	-213.421	-187.961	-512.075	#NULL!	#NULL!	550.467	-542.465	50.2203	-125.963	#NULL!	#NULL!	#NULL!	#NULL!	-131.208	-51.7111	#NULL!	#NULL!	-306.94	447.508
44.3984	-31.7458	186.439	-386.88	#NULL!	#NULL!	168.833	37.7017	189.539	666.207	#NULL!	#NULL!	206.772	-93.1208	435.908	-611.977	#NULL!	#NULL!	-70.0278	-129.052	#NULL!	#NULL!	#NULL!	#NULL!	#NULL!	#NULL!	67.6467	-18.9871	#NULL!	#NULL!	-272.346	-213.06	-243.587	-510.949	#NULL!	#NULL!	545.534	-542.456	68.6867	-124.803	#NULL!	#NULL!	#NULL!	#NULL!	-152.13	-49.3907	#NULL!	#NULL!	-311.891	448.702
67.3532	-29.1176	181.52	-386.861	#NULL!	#NULL!	163.917	37.7214	184.62	666.226	#NULL!	#NULL!	201.844	-93.0915	430.979	-611.95	#NULL!	#NULL!	-102.684	-130.032	#NULL!	#NULL!	#NULL!	#NULL!	#NULL!	#NULL!	63.3675	-18.9786	#NULL!	#NULL!	-275.914	-214.402	-284.951	-510.528	#NULL!	#NULL!	540.601	-542.446	60.0722	-123.642	#NULL!	#NULL!	#NULL!	#NULL!	-157.669	-49.3907	#NULL!	#NULL!	-290.809	450.872
53.012	-29.4488	124.951	-386.634	#NULL!	#NULL!	159	37.7411	140.964	666.402	#NULL!	#NULL!	193.219	-93.0403	545.578	-610.225	#NULL!	#NULL!	-55.8527	-127.962	#NULL!	#NULL!	#NULL!	#NULL!	#NULL!	#NULL!	41.9757	-17.9205	#NULL!	#NULL!	-214.452	-211.541	-297.077	-510.842	#NULL!	#NULL!	535.667	-542.437	51.4598	-121.322	#NULL!	#NULL!	#NULL!	#NULL!	-103.503	-47.0703	#NULL!	#NULL!	-280.881	453.12
48.0956	-29.4291	191.37	-384.565	#NULL!	#NULL!	154.084	37.7608	185.875	670.891	#NULL!	#NULL!	272.701	-91.1638	540.65	-610.198	#NULL!	#NULL!	-80.4884	-126.641	#NULL!	#NULL!	#NULL!	#NULL!	#NULL!	#NULL!	29.673	-17.896	#NULL!	#NULL!	-188.261	-209.59	-306.705	-510.823	#NULL!	#NULL!	530.734	-542.427	61.3096	-120.162	#NULL!	#NULL!	#NULL!	#NULL!	-115.813	-47.0703	#NULL!	#NULL!	-283.366	451.978
103.41	-28.4848	176.613	-384.506	#NULL!	#NULL!	149.168	37.7805	183.409	669.734	#NULL!	#NULL!	294.275	-88.9435	536.338	-610.174	#NULL!	#NULL!	-137.165	-126.305	#NULL!	#NULL!	#NULL!	#NULL!	#NULL!	#NULL!	23.7891	-17.8843	#NULL!	#NULL!	-196.815	-210.579	-310.984	-510.815	#NULL!	#NULL!	525.801	-542.417	56.3879	-119.002	#NULL!	#NULL!	#NULL!	#NULL!	-110.885	-44.75	#NULL!	#NULL!	-309.386	453.32
99.1133	-27.3018	171.694	-384.486	#NULL!	#NULL!	144.866	37.7977	140.989	671.072	#NULL!	#NULL!	219.111	-89.6714	533.25	-611.332	#NULL!	#NULL!	-70.6195	-124.352	#NULL!	#NULL!	#NULL!	#NULL!	#NULL!	#NULL!	112.591	-16.0295	#NULL!	#NULL!	-261.465	-209.372	-260.695	-508.884	#NULL!	#NULL!	520.868	-542.408	51.4691	-116.295	#NULL!	#NULL!	#NULL!	#NULL!	-119.501	-44.75	#NULL!	#NULL!	-275.918	454.244
41.3453	-27.0705	156.937	-384.427	#NULL!	#NULL!	141.788	36.6442	184.672	675.956	#NULL!	#NULL!	204.326	-89.5836	510.276	-607.291	#NULL!	#NULL!	-80.464	-121.945	#NULL!	#NULL!	#NULL!	#NULL!	#NULL!	#NULL!	101.893	-16.0082	#NULL!	#NULL!	-266.279	-210.373	-278.88	-508.509	#NULL!	#NULL!	663.934	-539.982	53.9367	-113.201	#NULL!	#NULL!	#NULL!	#NULL!	-151.508	-45.9102	#NULL!	#NULL!	-287.063	455.867
93.5872	-26.1139	152.018	-384.407	#NULL!	#NULL!	444.163	38.9308	178.521	675.591	#NULL!	#NULL!	200.63	-89.5617	445.794	-607.332	#NULL!	#NULL!	-121.123	-121.703	#NULL!	#NULL!	#NULL!	#NULL!	#NULL!	#NULL!	98.1487	-16.0008	#NULL!	#NULL!	-270.549	-209.345	-315.255	-508.775	#NULL!	#NULL!	657.767	-540.356	47.7841	-112.041	#NULL!	#NULL!	#NULL!	#NULL!	-100.211	-42.0429	#NULL!	#NULL!	-293.262	455.524
88.6708	-26.0943	147.714	-384.39	#NULL!	#NULL!	211.867	41.0267	174.217	675.608	#NULL!	#NULL!	188.315	-88.3143	440.865	-607.305	#NULL!	#NULL!	-70.5951	-119.655	#NULL!	#NULL!	#NULL!	#NULL!	#NULL!	#NULL!	54.8176	-16.9303	#NULL!	#NULL!	-273.759	-210.35	-318.999	-508.768	#NULL!	#NULL!	652.834	-540.347	44.0913	-112.041	#NULL!	#NULL!	#NULL!	#NULL!	-115.393	-42.0429	#NULL!	#NULL!	-303.796	455.598
84.3739	-24.9113	196.301	-382.25	#NULL!	#NULL!	198.352	42.2466	139.169	675.749	#NULL!	#NULL!	181.538	-88.2741	435.937	-607.278	#NULL!	#NULL!	-79.8236	-117.252	#NULL!	#NULL!	#NULL!	#NULL!	#NULL!	#NULL!	50.5384	-16.9218	#NULL!	#NULL!	-189.313	-205.529	-163.333	-506.707	#NULL!	#NULL!	647.9	-540.337	44.5109	-107.013	#NULL!	#NULL!	#NULL!	#NULL!	-147.811	-43.5898	#NULL!	#NULL!	-280.855	457.755
69.0117	-24.4612	186.463	-382.21	#NULL!	#NULL!	194.05	42.2638	187.154	680.226	#NULL!	#NULL!	281.35	-86.5183	431.009	-607.251	#NULL!	#NULL!	-118.222	-116.632	#NULL!	#NULL!	#NULL!	#NULL!	#NULL!	#NULL!	37.7008	-16.8963	#NULL!	#NULL!	-192.519	-205.519	-168.149	-507.036	#NULL!	#NULL!	642.967	-540.328	60.1044	-106.24	#NULL!	#NULL!	#NULL!	#NULL!	-91.1764	-37.7889	#NULL!	#NULL!	-309.979	457.96
62.8645	-24.8252	181.544	-382.19	#NULL!	#NULL!	184.833	42.6893	182.235	680.246	#NULL!	#NULL!	271.493	-86.4598	427.312	-607.231	#NULL!	#NULL!	-71.1868	-114.955	#NULL!	#NULL!	#NULL!	#NULL!	#NULL!	#NULL!	33.4216	-16.8878	#NULL!	#NULL!	-261.625	-204.975	-189.008	-506.656	#NULL!	#NULL!	638.034	-540.318	49.0322	-102.759	#NULL!	#NULL!	#NULL!	#NULL!	-95.4848	-37.7889	#NULL!	#NULL!	-287.039	460.117
57.9481	-24.8055	143.014	-381.647	#NULL!	#NULL!	179.3	42.3229	177.316	680.266	#NULL!	#NULL!	214.817	-86.1233	544.378	-605.127	#NULL!	#NULL!	-87.8139	-113.682	#NULL!	#NULL!	#NULL!	#NULL!	#NULL!	#NULL!	12.0256	-16.8453	#NULL!	#NULL!	-271.605	-206.298	-193.824	-506.985	#NULL!	#NULL!	633.101	-540.308	45.3394	-102.759	#NULL!	#NULL!	#NULL!	#NULL!	-101.026	-38.949	#NULL!	#NULL!	-294.473	460.555
51.8026	-24.7809	126.199	-383.136	#NULL!	#NULL!	173.769	42.345	173.62	679.113	#NULL!	#NULL!	177.651	-85.5112	538.215	-605.485	#NULL!	#NULL!	-112.456	-113.535	#NULL!	#NULL!	#NULL!	#NULL!	#NULL!	#NULL!	115.809	-14.0046	#NULL!	#NULL!	-207.472	-203.445	-239.291	-506.895	#NULL!	#NULL!	628.168	-540.299	42.886	-98.1185	#NULL!	#NULL!	#NULL!	#NULL!	-76.4028	-36.6287	#NULL!	#NULL!	-300.671	460.212
46.8812	-25.9269	191.397	-379.506	#NULL!	#NULL!	168.853	42.3647	137.964	680.424	#NULL!	#NULL!	264.729	-84.0712	533.287	-605.458	#NULL!	#NULL!	-127.241	-113.448	#NULL!	#NULL!	#NULL!	#NULL!	#NULL!	#NULL!	109.925	-13.9929	#NULL!	#NULL!	-188.761	-201.472	-243.574	-507.902	#NULL!	#NULL!	623.235	-540.289	39.1932	-98.1185	#NULL!	#NULL!	#NULL!	#NULL!	-82.5554	-35.4685	#NULL!	#NULL!	-305.009	460.243
40.7505	-22.4051	177.049	-379.448	#NULL!	#NULL!	163.937	42.3844	184.719	684.906	#NULL!	#NULL!	277.062	-81.796	517.272	-604.98	#NULL!	#NULL!	-71.7784	-110.254	#NULL!	#NULL!	#NULL!	#NULL!	#NULL!	#NULL!	101.906	-12.9613	#NULL!	#NULL!	-192.502	-201.46	-283.152	-506.808	#NULL!	#NULL!	618.302	-540.28	41.0482	-93.4777	#NULL!	#NULL!	#NULL!	#NULL!	-86.2505	-36.6287	#NULL!	#NULL!	-314.304	460.308
35.2195	-22.383	172.942	-380.988	#NULL!	#NULL!	159.02	42.4041	179.8	684.926	#NULL!	#NULL!	274.592	-82.9556	509.892	-602.981	#NULL!	#NULL!	-75.4747	-110.232	#NULL!	#NULL!	#NULL!	#NULL!	#NULL!	#NULL!	98.6964	-12.955	#NULL!	#NULL!	-257.691	-201.267	-294.385	-506.785	#NULL!	#NULL!	613.985	-540.271	44.5452	-88.4503	#NULL!	#NULL!	#NULL!	#NULL!	-123.176	-35.0818	#NULL!	#NULL!	-282.068	462.399
29.6836	-23.5266	154.496	-380.914	#NULL!	#NULL!	154.718	42.4213	137.982	683.926	#NULL!	#NULL!	259.813	-81.6936	505.579	-602.958	#NULL!	#NULL!	-98.8722	-107.745	#NULL!	#NULL!	#NULL!	#NULL!	#NULL!	#NULL!	39.9126	0.364952	#NULL!	#NULL!	-261.966	-201.254	-306.688	-506.761	#NULL!	#NULL!	608.436	-540.26	40.4391	-89.9972	#NULL!	#NULL!	#NULL!	#NULL!	-70.8571	-33.1481	#NULL!	#NULL!	-287.013	464.752
24.7672	-23.5069	149.583	-379.727	#NULL!	#NULL!	150.411	41.2728	141.69	687.414	#NULL!	#NULL!	252.42	-81.6497	444.591	-602.626	#NULL!	#NULL!	-103.185	-107.719	#NULL!	#NULL!	#NULL!	#NULL!	#NULL!	#NULL!	-55.8175	4.61759	#NULL!	#NULL!	-204.253	-200.411	-310.967	-506.752	#NULL!	#NULL!	603.503	-540.251	51.522	-87.6768	#NULL!	#NULL!	#NULL!	#NULL!	-62.8516	-30.8278	#NULL!	#NULL!	-291.97	464.787
19.8508	-23.4872	184.028	-377.53	#NULL!	#NULL!	146.724	41.2875	187.205	689.956	#NULL!	#NULL!	210.523	-82.5751	439.663	-602.599	#NULL!	#NULL!	-102.544	-103.026	#NULL!	#NULL!	#NULL!	#NULL!	#NULL!	#NULL!	-38.6922	6.61484	#NULL!	#NULL!	-251.805	-199.255	-177.233	-504.987	#NULL!	#NULL!	589.937	-539.838	45.9892	-84.1963	#NULL!	#NULL!	#NULL!	#NULL!	-66.5466	-31.988	#NULL!	#NULL!	-296.927	464.822
7.5597	-23.438	145.291	-377.375	#NULL!	#NULL!	445.412	43.5889	181.669	689.589	#NULL!	#NULL!	176.647	-81.1998	434.734	-602.572	#NULL!	#NULL!	-105.014	-104.186	#NULL!	#NULL!	#NULL!	#NULL!	#NULL!	#NULL!	-43.5063	6.6244	#NULL!	#NULL!	-269.972	-199.201	-183.652	-504.974	#NULL!	#NULL!	583.77	-540.212	34.2972	-83.0361	#NULL!	#NULL!	#NULL!	#NULL!	-89.9326	-30.8278	#NULL!	#NULL!	-301.885	464.856
81.3159	-21.4018	128.684	-378.476	#NULL!	#NULL!	224.173	44.4747	178.589	688.433	#NULL!	#NULL!	206.839	-80.2048	429.806	-602.545	#NULL!	#NULL!	-60.6408	-100.927	#NULL!	#NULL!	#NULL!	#NULL!	#NULL!	#NULL!	-47.7856	6.6329	#NULL!	#NULL!	-185.538	-197.423	-256.399	-504.829	#NULL!	#NULL!	565.272	-539.79	30.6044	-83.0361	#NULL!	#NULL!	#NULL!	#NULL!	-94.8564	-30.8278	#NULL!	#NULL!	-306.842	464.891
75.1753	-20.2114	192.649	-375.23	#NULL!	#NULL!	442.349	45.9327	141.714	692.084	#NULL!	#NULL!	272.152	-78.2442	424.877	-602.518	#NULL!	#NULL!	-70.5036	-102.042	#NULL!	#NULL!	#NULL!	#NULL!	#NULL!	#NULL!	-51.5299	6.64034	#NULL!	#NULL!	-193.553	-197.399	-276.19	-504.79	#NULL!	#NULL!	559.105	-540.164	44.1513	-79.5555	#NULL!	#NULL!	#NULL!	#NULL!	-98.5493	-30.8278	#NULL!	#NULL!	-314.276	465.33
70.2588	-20.1917	187.73	-375.21	#NULL!	#NULL!	194.686	47.3129	189.687	694.226	#NULL!	#NULL!	267.23	-77.0408	549.333	-600.847	#NULL!	#NULL!	-88.9789	-100.758	#NULL!	#NULL!	#NULL!	#NULL!	#NULL!	#NULL!	-30.6602	8.63014	#NULL!	#NULL!	-198.897	-197.383	-314.168	-504.715	#NULL!	#NULL!	554.171	-540.155	28.1618	-72.5944	#NULL!	#NULL!	#NULL!	#NULL!	-115.167	-30.8278	#NULL!	#NULL!	-319.235	464.978
65.3424	-20.172	179.124	-374.786	#NULL!	#NULL!	188.538	46.9489	185.383	694.244	#NULL!	#NULL!	259.837	-76.9969	544.405	-600.82	#NULL!	#NULL!	-92.6752	-100.737	#NULL!	#NULL!	#NULL!	#NULL!	#NULL!	#NULL!	-34.9394	8.63864	#NULL!	#NULL!	-257.674	-197.208	-160.643	-502.988	#NULL!	#NULL!	597.342	-537.535	16.4806	-65.6333	#NULL!	#NULL!	#NULL!	#NULL!	-120.709	-31.988	#NULL!	#NULL!	-282.042	467.035
61.0406	-20.1548	172.973	-375.151	#NULL!	#NULL!	183.622	46.9686	142.963	695.581	#NULL!	#NULL!	257.367	-78.1564	539.476	-600.793	#NULL!	#NULL!	-103.752	-98.3223	#NULL!	#NULL!	#NULL!	#NULL!	#NULL!	#NULL!	-57.4053	8.68326	#NULL!	#NULL!	-260.884	-198.213	-166.527	-502.977	#NULL!	#NULL!	577.609	-537.496	40.4863	-64.4731	#NULL!	#NULL!	#NULL!	#NULL!	-125.632	-31.988	#NULL!	#NULL!	-286.985	469.774
55.5096	-20.1327	164.367	-374.727	#NULL!	#NULL!	179.32	46.9858	136.814	695.606	#NULL!	#NULL!	246.278	-78.0906	534.548	-600.766	#NULL!	#NULL!	-108.064	-98.2966	#NULL!	#NULL!	#NULL!	#NULL!	#NULL!	#NULL!	-39.2101	10.6784	#NULL!	#NULL!	-251.254	-195.198	-188.991	-502.594	#NULL!	#NULL!	571.442	-537.871	20.182	-60.9926	#NULL!	#NULL!	#NULL!	#NULL!	-72.6928	-27.3472	#NULL!	#NULL!	-293.183	469.431
51.2077	-20.1154	154.529	-374.688	#NULL!	#NULL!	170.102	47.0227	192.171	698.887	#NULL!	#NULL!	241.972	-76.8908	530.852	-600.746	#NULL!	#NULL!	-60.6164	-96.23	#NULL!	#NULL!	#NULL!	#NULL!	#NULL!	#NULL!	-43.4894	10.6869	#NULL!	#NULL!	-269.421	-195.144	-192.207	-503.941	#NULL!	#NULL!	548.011	-537.439	15.8715	-62.1527	#NULL!	#NULL!	#NULL!	#NULL!	-93.6169	-26.187	#NULL!	#NULL!	-298.141	469.466
37.0828	-17.7274	148.993	-375.055	#NULL!	#NULL!	165.18	45.8767	187.252	698.906	#NULL!	#NULL!	203.155	-77.8345	519.763	-600.686	#NULL!	#NULL!	-92.6569	-97.2139	#NULL!	#NULL!	#NULL!	#NULL!	#NULL!	#NULL!	-47.7685	10.6954	#NULL!	#NULL!	-184.453	-193.368	-227.504	-502.517	#NULL!	#NULL!	541.843	-537.813	38.0351	-58.6722	#NULL!	#NULL!	#NULL!	#NULL!	-98.5407	-26.187	#NULL!	#NULL!	-302.478	469.496
73.9609	-16.7093	188.984	-370.545	#NULL!	#NULL!	160.264	45.8964	183.575	701.256	#NULL!	#NULL!	173.585	-77.659	514.835	-600.659	#NULL!	#NULL!	-69.2289	-93.8304	#NULL!	#NULL!	#NULL!	#NULL!	#NULL!	#NULL!	-22.0834	13.0142	#NULL!	#NULL!	-189.262	-193.353	-232.855	-502.845	#NULL!	#NULL!	536.91	-537.803	11.5739	-56.3518	#NULL!	#NULL!	#NULL!	#NULL!	-102.849	-26.187	#NULL!	#NULL!	-314.25	469.965
69.0494	-15.5238	184.065	-370.525	#NULL!	#NULL!	156.577	45.9111	190.966	703.562	#NULL!	#NULL!	168.675	-74.1072	509.921	-598.282	#NULL!	#NULL!	-100.85	-93.2512	#NULL!	#NULL!	#NULL!	#NULL!	#NULL!	#NULL!	-27.4338	12.6862	#NULL!	#NULL!	-194.609	-194.352	-236.068	-503.854	#NULL!	#NULL!	531.977	-537.794	11.5825	-51.7111	#NULL!	#NULL!	#NULL!	#NULL!	-76.9947	-23.8666	#NULL!	#NULL!	-321.068	469.627
64.133	-15.5041	179.146	-370.506	#NULL!	#NULL!	227.88	49.1229	186.047	703.581	#NULL!	#NULL!	258.63	-72.2929	504.993	-598.255	#NULL!	#NULL!	-61.2081	-91.5296	#NULL!	#NULL!	#NULL!	#NULL!	#NULL!	#NULL!	-31.1781	12.6937	#NULL!	#NULL!	-256.054	-193.154	-292.764	-502.726	#NULL!	#NULL!	527.044	-537.784	35.5904	-49.3907	#NULL!	#NULL!	#NULL!	#NULL!	-9.90344	-21.5463	#NULL!	#NULL!	-283.862	474.001
59.2166	-15.4845	174.227	-370.486	#NULL!	#NULL!	443.394	50.9801	189.761	708.236	#NULL!	#NULL!	236.446	-73.3354	500.68	-598.232	#NULL!	#NULL!	-100.007	-88.9508	#NULL!	#NULL!	#NULL!	#NULL!	#NULL!	#NULL!	-52.0393	12.7351	#NULL!	#NULL!	-246.966	-192.167	-305.601	-502.7	#NULL!	#NULL!	522.111	-537.775	35.1893	-44.3633	#NULL!	#NULL!	#NULL!	#NULL!	-19.1356	-21.5463	#NULL!	#NULL!	-289.439	474.041
54.3002	-15.4648	169.308	-370.466	#NULL!	#NULL!	197.162	51.5774	184.842	708.256	#NULL!	#NULL!	200.715	-73.1232	440.926	-597.515	#NULL!	#NULL!	-102.477	-90.1103	#NULL!	#NULL!	#NULL!	#NULL!	#NULL!	#NULL!	-56.8533	12.7447	#NULL!	#NULL!	-250.168	-191.143	-175.077	-500.928	#NULL!	#NULL!	518.411	-537.767	-5.01823	-42.4296	#NULL!	#NULL!	#NULL!	#NULL!	-30.8297	-21.5463	#NULL!	#NULL!	-294.397	474.075
49.3837	-15.4451	164.389	-370.447	#NULL!	#NULL!	192.86	51.5947	189.788	713.295	#NULL!	#NULL!	162.526	-71.7222	437.22	-599.061	#NULL!	#NULL!	-61.7998	-86.8292	#NULL!	#NULL!	#NULL!	#NULL!	#NULL!	#NULL!	-40.2629	14.743	#NULL!	#NULL!	-268.335	-191.089	-252.103	-500.776	#NULL!	#NULL!	663.94	-536.892	91.0047	-37.7889	#NULL!	#NULL!	#NULL!	#NULL!	-81.2988	-21.5463	#NULL!	#NULL!	-299.354	474.11
45.0819	-15.4279	159.47	-370.427	#NULL!	#NULL!	187.324	50.4511	184.252	712.929	#NULL!	#NULL!	253.715	-69.5239	428.603	-597.84	#NULL!	#NULL!	-93.8219	-84.2907	#NULL!	#NULL!	#NULL!	#NULL!	#NULL!	#NULL!	-44.0072	14.7504	#NULL!	#NULL!	-184.612	-188.97	-273.499	-500.733	#NULL!	#NULL!	659.01	-535.723	87.3119	-37.7889	#NULL!	#NULL!	#NULL!	#NULL!	-84.9916	-21.5463	#NULL!	#NULL!	-304.311	474.145
34.0199	-15.3836	154.551	-370.407	#NULL!	#NULL!	181.184	51.6414	143.682	715.426	#NULL!	#NULL!	247.553	-69.8787	423.675	-597.813	#NULL!	#NULL!	-60.5433	-82.1398	#NULL!	#NULL!	#NULL!	#NULL!	#NULL!	#NULL!	-47.7558	13.7422	#NULL!	#NULL!	-188.18	-190.313	-286.336	-500.707	#NULL!	#NULL!	654.077	-535.714	-7.4737	-38.949	#NULL!	#NULL!	#NULL!	#NULL!	-94.8393	-21.5463	#NULL!	#NULL!	-311.754	473.038
27.2615	-14.9679	150.862	-370.392	#NULL!	#NULL!	176.267	51.6611	194.729	717.557	#NULL!	#NULL!	243.857	-69.8567	419.362	-597.789	#NULL!	#NULL!	-96.2739	-81.9277	#NULL!	#NULL!	#NULL!	#NULL!	#NULL!	#NULL!	-60.5934	13.7677	#NULL!	#NULL!	-196.73	-190.287	-313.081	-500.654	#NULL!	#NULL!	649.143	-535.704	-11.1666	-38.949	#NULL!	#NULL!	#NULL!	#NULL!	-99.7631	-21.5463	#NULL!	#NULL!	-317.944	474.241
40.7898	-13.0792	123.808	-370.284	#NULL!	#NULL!	171.965	51.6783	189.81	717.576	#NULL!	#NULL!	232.762	-70.9651	549.362	-596.148	#NULL!	#NULL!	-79.0125	-79.6818	#NULL!	#NULL!	#NULL!	#NULL!	#NULL!	#NULL!	-31.1611	16.7562	#NULL!	#NULL!	-243.213	-189.134	-161.161	-498.925	#NULL!	#NULL!	644.21	-535.694	78.6995	-35.4685	#NULL!	#NULL!	#NULL!	#NULL!	-104.687	-21.5463	#NULL!	#NULL!	-320.429	473.099
66.606	-12.0168	120.118	-370.269	#NULL!	#NULL!	231.587	53.7711	184.891	717.596	#NULL!	#NULL!	197.037	-69.5787	544.434	-596.121	#NULL!	#NULL!	-91.3334	-79.6086	#NULL!	#NULL!	#NULL!	#NULL!	#NULL!	#NULL!	-54.6968	16.8029	#NULL!	#NULL!	-255.507	-190.112	-164.905	-498.917	#NULL!	#NULL!	639.277	-535.685	73.7757	-35.4685	#NULL!	#NULL!	#NULL!	#NULL!	-107.151	-22.7065	#NULL!	#NULL!	-283.836	478.637
62.309	-10.8338	193.93	-365.506	#NULL!	#NULL!	227.894	52.6202	145.552	720.089	#NULL!	#NULL!	192.725	-69.5531	539.506	-596.094	#NULL!	#NULL!	-58.8741	-77.0615	#NULL!	#NULL!	#NULL!	#NULL!	#NULL!	#NULL!	-57.3755	15.7926	#NULL!	#NULL!	-259.782	-190.1	-184.697	-498.878	#NULL!	#NULL!	634.344	-535.675	68.8519	-35.4685	#NULL!	#NULL!	#NULL!	#NULL!	-3.12891	-19.2259	#NULL!	#NULL!	-289.413	478.676
56.7731	-11.9774	187.779	-365.87	#NULL!	#NULL!	207.005	53.8696	141.248	720.106	#NULL!	#NULL!	157.61	-69.3446	534.577	-596.067	#NULL!	#NULL!	-88.8448	-74.9265	#NULL!	#NULL!	#NULL!	#NULL!	#NULL!	#NULL!	-64.8641	15.8075	#NULL!	#NULL!	-264.587	-189.071	-188.976	-498.87	#NULL!	#NULL!	629.411	-535.666	64.5435	-35.4685	#NULL!	#NULL!	#NULL!	#NULL!	-14.8251	-20.3861	#NULL!	#NULL!	-294.37	478.711
50.018	-10.7846	183.475	-365.853	#NULL!	#NULL!	202.088	53.8892	197.214	722.217	#NULL!	#NULL!	229.078	-68.5948	529.649	-596.04	#NULL!	#NULL!	-92.5411	-74.9046	#NULL!	#NULL!	#NULL!	#NULL!	#NULL!	#NULL!	-41.32	17.792	#NULL!	#NULL!	-249.082	-187.087	-192.72	-498.862	#NULL!	#NULL!	624.478	-535.656	-3.77441	-35.4685	#NULL!	#NULL!	#NULL!	#NULL!	-76.3706	-19.2259	#NULL!	#NULL!	-299.328	478.746
-35.336	5.87785	180.395	-367.008	#NULL!	#NULL!	447.921	55.625	192.294	722.236	#NULL!	#NULL!	224.155	-67.3913	519.792	-595.986	#NULL!	#NULL!	-55.5661	-72.7757	#NULL!	#NULL!	#NULL!	#NULL!	#NULL!	#NULL!	-77.1541	18.8788	#NULL!	#NULL!	-252.292	-188.093	-223.209	-498.802	#NULL!	#NULL!	619.545	-535.646	88.5493	-34.3083	#NULL!	#NULL!	#NULL!	#NULL!	11.0292	-18.0657	#NULL!	#NULL!	-304.285	478.781
-40.2524	5.89754	169.333	-365.796	#NULL!	#NULL!	441.774	55.2611	187.375	722.256	#NULL!	#NULL!	248.803	-66.3635	514.864	-595.96	#NULL!	#NULL!	-59.8785	-72.7501	#NULL!	#NULL!	#NULL!	#NULL!	#NULL!	#NULL!	-84.112	17.877	#NULL!	#NULL!	-180.677	-184.924	-226.423	-499.811	#NULL!	#NULL!	614.612	-535.637	39.314	-32.7614	#NULL!	#NULL!	#NULL!	#NULL!	-81.2902	-16.9056	#NULL!	#NULL!	-309.242	478.815
-45.1688	5.91722	164.414	-365.777	#NULL!	#NULL!	438.086	55.2758	183.686	722.271	#NULL!	#NULL!	241.411	-66.3196	386.719	-596.437	#NULL!	#NULL!	-71.5711	-70.3323	#NULL!	#NULL!	#NULL!	#NULL!	#NULL!	#NULL!	-93.736	18.9117	#NULL!	#NULL!	-184.957	-186.264	-304.514	-498.64	#NULL!	#NULL!	609.678	-535.627	33.1585	-33.1481	#NULL!	#NULL!	#NULL!	#NULL!	-86.214	-16.9056	#NULL!	#NULL!	-314.2	478.85
-47.6319	4.76132	159.495	-365.757	#NULL!	#NULL!	236.513	56.0829	144.347	724.764	#NULL!	#NULL!	188.431	-66.005	383.023	-596.417	#NULL!	#NULL!	-75.2674	-70.3103	#NULL!	#NULL!	#NULL!	#NULL!	#NULL!	#NULL!	-97.4803	18.9191	#NULL!	#NULL!	-196.708	-185.214	-176.13	-496.864	#NULL!	#NULL!	604.745	-535.618	29.4635	-34.3083	#NULL!	#NULL!	#NULL!	#NULL!	-96.0638	-18.0657	#NULL!	#NULL!	-319.157	478.885
-50.0754	8.26839	155.191	-365.74	#NULL!	#NULL!	211.931	56.1814	139.428	724.784	#NULL!	#NULL!	153.938	-64.626	553.073	-593.818	#NULL!	#NULL!	-88.4077	-69.8409	#NULL!	#NULL!	#NULL!	#NULL!	#NULL!	#NULL!	-108.178	18.9404	#NULL!	#NULL!	-242.666	-186.092	-247.806	-496.721	#NULL!	#NULL!	589.946	-535.589	-15.4642	-33.1481	#NULL!	#NULL!	#NULL!	#NULL!	-99.7566	-18.0657	#NULL!	#NULL!	-322.875	478.911
-56.2209	8.293	148.427	-365.712	#NULL!	#NULL!	198.411	56.2355	198.468	726.882	#NULL!	#NULL!	236.494	-63.942	524.735	-593.664	#NULL!	#NULL!	-92.5228	-71.3821	#NULL!	#NULL!	#NULL!	#NULL!	#NULL!	#NULL!	-110.857	17.9301	#NULL!	#NULL!	-238.379	-183.061	-269.202	-496.679	#NULL!	#NULL!	585.013	-535.579	62.7057	-30.8278	#NULL!	#NULL!	#NULL!	#NULL!	-3.12033	-14.5852	#NULL!	#NULL!	-285.669	483.286
-61.1373	8.31269	144.123	-365.695	#NULL!	#NULL!	184.891	56.2896	193.549	726.902	#NULL!	#NULL!	232.798	-63.92	509.95	-593.583	#NULL!	#NULL!	-56.7738	-68.0717	#NULL!	#NULL!	#NULL!	#NULL!	#NULL!	#NULL!	-78.7418	22.9444	#NULL!	#NULL!	-250.134	-183.026	-284.18	-496.649	#NULL!	#NULL!	565.28	-535.541	57.7818	-30.8278	#NULL!	#NULL!	#NULL!	#NULL!	-55.438	-15.7454	#NULL!	#NULL!	-290.626	483.32
-66.0537	8.33237	120.143	-365.599	#NULL!	#NULL!	179.974	56.3093	188.63	726.921	#NULL!	#NULL!	219.245	-63.8395	505.022	-593.557	#NULL!	#NULL!	-60.4701	-68.0497	#NULL!	#NULL!	#NULL!	#NULL!	#NULL!	#NULL!	-80.8856	21.9331	#NULL!	#NULL!	-252.276	-184.034	-310.925	-496.596	#NULL!	#NULL!	560.347	-535.531	52.858	-30.8278	#NULL!	#NULL!	#NULL!	#NULL!	-62.2061	-14.5852	#NULL!	#NULL!	-295.584	483.355
-43.92	10.5753	187.804	-361.2	#NULL!	#NULL!	175.053	55.1633	184.326	726.938	#NULL!	#NULL!	214.939	-62.6398	500.094	-593.53	#NULL!	#NULL!	-70.3208	-66.817	#NULL!	#NULL!	#NULL!	#NULL!	#NULL!	#NULL!	-96.9326	21.9649	#NULL!	#NULL!	-174.784	-181.221	-161.144	-494.862	#NULL!	#NULL!	555.414	-535.522	49.163	-31.988	#NULL!	#NULL!	#NULL!	#NULL!	-76.3621	-14.5852	#NULL!	#NULL!	-300.541	483.39
-70.9603	10.6835	182.885	-361.181	#NULL!	#NULL!	171.365	55.178	143.135	728.271	#NULL!	#NULL!	184.747	-63.6347	443.41	-594.396	#NULL!	#NULL!	-80.1714	-65.5843	#NULL!	#NULL!	#NULL!	#NULL!	#NULL!	#NULL!	-93.7147	23.9898	#NULL!	#NULL!	-181.196	-181.202	-164.353	-494.856	#NULL!	#NULL!	599.818	-532.904	-9.91988	-30.441	#NULL!	#NULL!	#NULL!	#NULL!	-89.9047	-15.7454	#NULL!	#NULL!	-305.498	483.425
-48.212	12.924	169.36	-360.737	#NULL!	#NULL!	242.668	58.3898	138.222	729.458	#NULL!	#NULL!	181.05	-63.6127	438.489	-593.194	#NULL!	#NULL!	-83.8738	-66.7366	#NULL!	#NULL!	#NULL!	#NULL!	#NULL!	#NULL!	-131.128	31.1735	#NULL!	#NULL!	-183.872	-182.208	-184.678	-494.477	#NULL!	#NULL!	593.651	-533.278	41.7837	-28.5074	#NULL!	#NULL!	#NULL!	#NULL!	-29.5808	-11.8781	#NULL!	#NULL!	-310.456	483.459
-54.9721	12.9511	163.209	-361.102	#NULL!	#NULL!	231.606	58.4341	194.803	731.567	#NULL!	#NULL!	229.114	-61.5497	433.561	-593.167	#NULL!	#NULL!	-87.57	-66.7146	#NULL!	#NULL!	#NULL!	#NULL!	#NULL!	#NULL!	-134.337	31.1799	#NULL!	#NULL!	-236.224	-179.009	-190.029	-494.805	#NULL!	#NULL!	580.085	-532.865	38.0887	-29.6676	#NULL!	#NULL!	#NULL!	#NULL!	-66.5102	-12.2648	#NULL!	#NULL!	-316.652	483.503
-61.1176	12.9757	158.29	-361.082	#NULL!	#NULL!	216.857	58.4932	189.884	731.586	#NULL!	#NULL!	210.023	-60.2621	428.632	-593.14	#NULL!	#NULL!	-56.7555	-64.5492	#NULL!	#NULL!	#NULL!	#NULL!	#NULL!	#NULL!	-158.922	36.3068	#NULL!	#NULL!	-250.117	-178.967	-193.242	-495.814	#NULL!	#NULL!	573.918	-533.24	30.7052	-28.5074	#NULL!	#NULL!	#NULL!	#NULL!	-81.2816	-12.2648	#NULL!	#NULL!	-321.61	483.538
-66.0341	12.9953	153.371	-361.062	#NULL!	#NULL!	207.024	58.5325	185.58	731.604	#NULL!	#NULL!	177.366	-61.2424	424.32	-593.117	#NULL!	#NULL!	-61.6778	-63.3457	#NULL!	#NULL!	#NULL!	#NULL!	#NULL!	#NULL!	-182.457	36.3536	#NULL!	#NULL!	-254.396	-179.969	-207.145	-494.771	#NULL!	#NULL!	568.985	-533.23	28.2411	-29.6676	#NULL!	#NULL!	#NULL!	#NULL!	-86.2054	-12.2648	#NULL!	#NULL!	-325.321	484.723
-75.8669	13.0347	149.675	-362.215	#NULL!	#NULL!	202.108	58.5522	138.241	732.961	#NULL!	#NULL!	149.034	-59.9	418.768	-594.262	#NULL!	#NULL!	-64.7459	-60.9791	#NULL!	#NULL!	#NULL!	#NULL!	#NULL!	#NULL!	-185.667	36.36	#NULL!	#NULL!	-172.099	-178.185	-212.499	-495.776	#NULL!	#NULL!	550.487	-532.808	-2.53059	-28.5074	#NULL!	#NULL!	#NULL!	#NULL!	26.4311	-9.94444	#NULL!	#NULL!	-285.643	487.921
-44.5149	15.2407	143.533	-361.023	#NULL!	#NULL!	443.022	59.9191	194.828	736.236	#NULL!	#NULL!	146.564	-61.0596	415.079	-593.067	#NULL!	#NULL!	-80.147	-60.8876	#NULL!	#NULL!	#NULL!	#NULL!	#NULL!	#NULL!	-205.613	41.8163	#NULL!	#NULL!	-175.301	-177.161	-216.774	-494.752	#NULL!	#NULL!	544.319	-533.182	59.0192	-27.3472	#NULL!	#NULL!	#NULL!	#NULL!	23.3516	-11.1046	#NULL!	#NULL!	-290.6	487.956
-70.9407	15.3465	141.067	-362.18	#NULL!	#NULL!	438.106	59.9388	189.909	736.256	#NULL!	#NULL!	224.198	-59.1721	549.392	-591.448	#NULL!	#NULL!	-65.3436	-57.4529	#NULL!	#NULL!	#NULL!	#NULL!	#NULL!	#NULL!	-202.745	45.5345	#NULL!	#NULL!	-180.649	-178.16	-221.053	-494.743	#NULL!	#NULL!	539.386	-533.173	54.0954	-27.3472	#NULL!	#NULL!	#NULL!	#NULL!	-70.1987	-9.94444	#NULL!	#NULL!	-295.558	487.991
-83.2317	15.3957	118.938	-360.924	#NULL!	#NULL!	211.952	61.2329	194.855	741.296	#NULL!	#NULL!	219.27	-59.1428	539.528	-592.57	#NULL!	#NULL!	-74.5416	-49.1788	#NULL!	#NULL!	#NULL!	#NULL!	#NULL!	#NULL!	-205.954	45.5409	#NULL!	#NULL!	-167.812	-175.154	-224.797	-494.736	#NULL!	#NULL!	534.453	-533.163	14.7071	-26.187	#NULL!	#NULL!	#NULL!	#NULL!	-76.3556	-11.1046	#NULL!	#NULL!	-300.515	488.025
-56.7961	17.6214	116.472	-362.082	#NULL!	#NULL!	197.203	61.292	189.319	740.929	#NULL!	#NULL!	203.258	-57.8736	534.607	-591.368	#NULL!	#NULL!	-22.7816	-47.1377	#NULL!	#NULL!	#NULL!	#NULL!	#NULL!	#NULL!	-220.397	45.5696	#NULL!	#NULL!	-187.048	-175.097	-233.891	-494.718	#NULL!	#NULL!	529.52	-533.154	9.78324	-26.187	#NULL!	#NULL!	#NULL!	#NULL!	-19.7246	-7.23734	#NULL!	#NULL!	-305.472	488.06
-62.3271	17.6436	186.599	-356.525	#NULL!	#NULL!	189.827	60.9329	199.796	745.557	#NULL!	#NULL!	172.45	-58.8648	529.678	-591.341	#NULL!	#NULL!	-68.985	-46.8634	#NULL!	#NULL!	#NULL!	#NULL!	#NULL!	#NULL!	-217.714	47.5955	#NULL!	#NULL!	-190.258	-176.102	-278.821	-494.29	#NULL!	#NULL!	527.051	-534.308	-7.45226	-27.3472	#NULL!	#NULL!	#NULL!	#NULL!	-25.8801	-7.62407	#NULL!	#NULL!	-310.43	488.095
-67.2435	17.6632	181.68	-356.506	#NULL!	#NULL!	185.525	60.9501	194.877	745.576	#NULL!	#NULL!	215.585	-56.7725	519.814	-592.462	#NULL!	#NULL!	-28.3199	-45.9306	#NULL!	#NULL!	#NULL!	#NULL!	#NULL!	#NULL!	-224.488	47.9475	#NULL!	#NULL!	-236.207	-174.95	-293.798	-494.26	#NULL!	#NULL!	518.421	-533.132	40.5592	-25.0268	#NULL!	#NULL!	#NULL!	#NULL!	-30.8039	-7.62407	#NULL!	#NULL!	-315.387	488.13
-74.0036	17.6903	176.761	-356.486	#NULL!	#NULL!	181.218	59.8016	191.182	744.424	#NULL!	#NULL!	209.433	-55.1704	514.893	-591.261	#NULL!	#NULL!	-45.5631	-44.654	#NULL!	#NULL!	#NULL!	#NULL!	#NULL!	#NULL!	-251.413	47.6625	#NULL!	#NULL!	-245.825	-174.922	-299.148	-494.588	#NULL!	#NULL!	514.104	-533.124	29.4828	-23.8666	#NULL!	#NULL!	#NULL!	#NULL!	-34.4968	-7.62407	#NULL!	#NULL!	-319.725	488.16
-24.2199	18.6567	171.842	-356.466	#NULL!	#NULL!	257.437	62.9937	199.821	750.227	#NULL!	#NULL!	168.766	-56.4945	524.764	-588.965	#NULL!	#NULL!	-71.437	-44.5004	#NULL!	#NULL!	#NULL!	#NULL!	#NULL!	#NULL!	-203.802	48.5835	#NULL!	#NULL!	-240.474	-172.908	-303.428	-494.58	#NULL!	#NULL!	656.55	-532.242	25.7878	-25.0268	#NULL!	#NULL!	#NULL!	#NULL!	-59.1159	-7.62407	#NULL!	#NULL!	-289.333	492.969
-46.3389	19.9111	166.923	-356.447	#NULL!	#NULL!	242.683	61.887	194.902	750.246	#NULL!	#NULL!	144.13	-55.1741	509.979	-588.884	#NULL!	#NULL!	-19.0609	-42.463	#NULL!	#NULL!	#NULL!	#NULL!	#NULL!	#NULL!	-207.007	49.6055	#NULL!	#NULL!	-167.795	-171.095	-307.707	-494.571	#NULL!	#NULL!	650.386	-531.071	2.39966	-25.0268	#NULL!	#NULL!	#NULL!	#NULL!	-64.0397	-7.62407	#NULL!	#NULL!	-295.531	492.626
-50.0262	19.9258	162.004	-356.427	#NULL!	#NULL!	231.628	63.4857	148.786	750.431	#NULL!	#NULL!	141.66	-56.3336	505.051	-588.857	#NULL!	#NULL!	-41.8546	-42.3276	#NULL!	#NULL!	#NULL!	#NULL!	#NULL!	#NULL!	-221.976	51.6665	#NULL!	#NULL!	-184.898	-172.059	-178.252	-492.797	#NULL!	#NULL!	645.453	-531.061	-2.52415	-25.0268	#NULL!	#NULL!	#NULL!	#NULL!	29.5149	-6.46389	#NULL!	#NULL!	-300.489	492.661
-78.2956	20.039	157.085	-356.407	#NULL!	#NULL!	227.934	61.9461	199.846	754.897	#NULL!	#NULL!	200.819	-53.1622	500.123	-588.831	#NULL!	#NULL!	-66.5025	-43.3555	#NULL!	#NULL!	#NULL!	#NULL!	#NULL!	#NULL!	-226.255	51.675	#NULL!	#NULL!	-227.107	-170.919	-229.601	-492.357	#NULL!	#NULL!	640.52	-531.052	15.9444	-22.7065	#NULL!	#NULL!	#NULL!	#NULL!	25.8221	-6.46389	#NULL!	#NULL!	-305.446	492.696
-83.212	20.0587	152.166	-356.387	#NULL!	#NULL!	204.587	63.5939	194.927	754.916	#NULL!	#NULL!	196.506	-53.1366	436.047	-589.657	#NULL!	#NULL!	-23.3671	-41.2632	#NULL!	#NULL!	#NULL!	#NULL!	#NULL!	#NULL!	-230.535	51.6835	#NULL!	#NULL!	-231.92	-171.919	-239.231	-492.676	#NULL!	#NULL!	636.818	-532.203	-78.809	-6.46389	#NULL!	#NULL!	#NULL!	#NULL!	-49.2632	-4.91697	#NULL!	#NULL!	-310.404	492.731
-87.5139	20.0759	142.328	-356.348	#NULL!	#NULL!	435.667	64.6116	149.018	755.49	#NULL!	#NULL!	192.194	-53.111	431.118	-589.63	#NULL!	#NULL!	-30.1376	-40.0488	#NULL!	#NULL!	#NULL!	#NULL!	#NULL!	#NULL!	-233.744	51.6899	#NULL!	#NULL!	-245.808	-170.863	-242.975	-492.669	#NULL!	#NULL!	631.885	-532.194	-82.5018	-6.46389	#NULL!	#NULL!	#NULL!	#NULL!	-55.4187	-5.3037	#NULL!	#NULL!	-315.361	492.765
-27.8924	22.1687	137.409	-356.328	#NULL!	#NULL!	216.887	65.4876	199.87	759.567	#NULL!	#NULL!	187.266	-53.0817	415.109	-588.368	#NULL!	#NULL!	-36.912	-39.6171	#NULL!	#NULL!	#NULL!	#NULL!	#NULL!	#NULL!	-261.192	54.1142	#NULL!	#NULL!	-170.997	-170.071	-246.724	-493.677	#NULL!	#NULL!	626.954	-531.025	-86.808	-5.3037	#NULL!	#NULL!	#NULL!	#NULL!	-68.9613	-6.46389	#NULL!	#NULL!	-320.318	492.8
-59.8492	22.2967	115.273	-356.239	#NULL!	#NULL!	211.97	65.5073	194.951	759.586	#NULL!	#NULL!	165.082	-54.1242	529.707	-586.642	#NULL!	#NULL!	-46.7769	-41.1242	#NULL!	#NULL!	#NULL!	#NULL!	#NULL!	#NULL!	-233.727	55.7524	#NULL!	#NULL!	-175.267	-169.044	-266.511	-492.622	#NULL!	#NULL!	622.021	-531.016	19.6716	-4.14352	#NULL!	#NULL!	#NULL!	#NULL!	49.2145	-4.14352	#NULL!	#NULL!	-324.036	492.826
-64.151	22.3139	189.085	-351.476	#NULL!	#NULL!	197.221	65.5664	150.674	758.596	#NULL!	#NULL!	160.16	-52.9208	521.083	-586.595	#NULL!	#NULL!	-18.4205	-37.7699	#NULL!	#NULL!	#NULL!	#NULL!	#NULL!	#NULL!	-238.006	55.7609	#NULL!	#NULL!	-238.319	-168.856	-284.167	-493.602	#NULL!	#NULL!	617.088	-531.006	-91.1121	-2.98333	#NULL!	#NULL!	#NULL!	#NULL!	-17.257	-4.14352	#NULL!	#NULL!	-288.069	497.209
-68.4578	21.1654	182.934	-351.841	#NULL!	#NULL!	192.304	65.5861	142.072	759.798	#NULL!	#NULL!	140.452	-51.6296	497.057	-586.464	#NULL!	#NULL!	-51.0709	-37.576	#NULL!	#NULL!	#NULL!	#NULL!	#NULL!	#NULL!	-258.859	57.8335	#NULL!	#NULL!	-167.244	-167.039	-161.127	-490.8	#NULL!	#NULL!	612.155	-530.996	-96.0359	-2.98333	#NULL!	#NULL!	#NULL!	#NULL!	-22.1787	-2.98333	#NULL!	#NULL!	-293.027	497.244
-73.3693	22.3508	178.015	-351.821	#NULL!	#NULL!	188.612	64.4351	117.483	761.064	#NULL!	#NULL!	136.146	-50.4298	492.129	-586.438	#NULL!	#NULL!	-29.4971	-35.3557	#NULL!	#NULL!	#NULL!	#NULL!	#NULL!	#NULL!	-235.85	59.8191	#NULL!	#NULL!	-224.422	-167.883	-164.336	-490.793	#NULL!	#NULL!	607.221	-530.987	-100.96	-2.98333	#NULL!	#NULL!	#NULL!	#NULL!	-27.1025	-2.98333	#NULL!	#NULL!	-297.364	497.275
-93.035	22.4296	173.096	-351.801	#NULL!	#NULL!	264.014	68.019	199.895	764.236	#NULL!	#NULL!	198.373	-49.6251	524.794	-584.266	#NULL!	#NULL!	-34.4255	-35.3265	#NULL!	#NULL!	#NULL!	#NULL!	#NULL!	#NULL!	-240.129	59.8276	#NULL!	#NULL!	-242.59	-167.829	-182.523	-490.757	#NULL!	#NULL!	587.489	-530.948	-105.883	-2.98333	#NULL!	#NULL!	#NULL!	#NULL!	-31.4108	-2.98333	#NULL!	#NULL!	-301.709	496.146
-97.9514	22.4492	168.177	-351.781	#NULL!	#NULL!	259.91	66.4811	194.976	764.256	#NULL!	#NULL!	190.98	-49.5812	506.312	-584.165	#NULL!	#NULL!	-39.3539	-35.2972	#NULL!	#NULL!	#NULL!	#NULL!	#NULL!	#NULL!	-243.342	58.8183	#NULL!	#NULL!	-174.181	-164.989	-186.802	-490.749	#NULL!	#NULL!	562.823	-530.9	-86.1833	-0.276234	#NULL!	#NULL!	#NULL!	#NULL!	-41.8739	-2.98333	#NULL!	#NULL!	-306.659	497.34
-102.868	22.4689	163.258	-351.762	#NULL!	#NULL!	235.333	67.7453	191.287	764.271	#NULL!	#NULL!	181.13	-48.3485	501.384	-584.138	#NULL!	#NULL!	-14.2871	-32.7062	#NULL!	#NULL!	#NULL!	#NULL!	#NULL!	#NULL!	-271.144	61.9205	#NULL!	#NULL!	-237.768	-164.799	-191.082	-490.74	#NULL!	#NULL!	557.89	-530.891	-93.5675	0.497222	#NULL!	#NULL!	#NULL!	#NULL!	-62.1847	-2.98333	#NULL!	#NULL!	-312.856	497.384
-46.3241	23.4083	160.793	-352.919	#NULL!	#NULL!	230.417	67.765	142.09	763.301	#NULL!	#NULL!	156.488	-48.2022	421.298	-583.702	#NULL!	#NULL!	-51.6626	-32.8757	#NULL!	#NULL!	#NULL!	#NULL!	#NULL!	#NULL!	-275.424	61.929	#NULL!	#NULL!	-220.481	-162.483	-206.059	-490.711	#NULL!	#NULL!	602.294	-528.273	-98.4892	1.65741	#NULL!	#NULL!	#NULL!	#NULL!	-36.9458	-0.662963	#NULL!	#NULL!	-316.574	497.41
-78.2743	25.0906	152.602	-351.33	#NULL!	#NULL!	226.729	67.7797	199.92	768.907	#NULL!	#NULL!	187.296	-47.2109	416.37	-583.675	#NULL!	#NULL!	-55.365	-34.0279	#NULL!	#NULL!	#NULL!	#NULL!	#NULL!	#NULL!	-278.633	61.9353	#NULL!	#NULL!	-234.019	-162.781	-217.827	-490.687	#NULL!	#NULL!	596.127	-528.647	-103.413	1.65741	#NULL!	#NULL!	#NULL!	#NULL!	-46.7934	-0.662963	#NULL!	#NULL!	-324.63	497.466
-84.4214	24.7266	132.514	-351.639	#NULL!	#NULL!	207.064	67.8585	195.001	768.926	#NULL!	#NULL!	174.975	-47.1377	529.737	-581.943	#NULL!	#NULL!	-29.4727	-30.659	#NULL!	#NULL!	#NULL!	#NULL!	#NULL!	#NULL!	-273.267	65.9872	#NULL!	#NULL!	-171.493	-160.938	-275.596	-490.573	#NULL!	#NULL!	592.425	-529.799	-107.106	1.65741	#NULL!	#NULL!	#NULL!	#NULL!	-51.1018	-0.662963	#NULL!	#NULL!	-289.283	501.854
-89.3379	24.7463	115.298	-351.569	#NULL!	#NULL!	202.762	67.8757	190.082	768.946	#NULL!	#NULL!	170.047	-47.1084	519.88	-581.889	#NULL!	#NULL!	-33.785	-30.6334	#NULL!	#NULL!	#NULL!	#NULL!	#NULL!	#NULL!	-276.481	64.9779	#NULL!	#NULL!	-151.646	-142.734	-279.879	-491.58	#NULL!	#NULL!	582.561	-528.621	88.6243	6.29814	#NULL!	#NULL!	#NULL!	#NULL!	-75.1075	-1.82315	#NULL!	#NULL!	-294.24	501.889
-107.16	24.8176	111.609	-351.555	#NULL!	#NULL!	435.689	69.6632	202.404	773.567	#NULL!	#NULL!	166.351	-47.0865	495.238	-581.755	#NULL!	#NULL!	-39.3295	-30.6005	#NULL!	#NULL!	#NULL!	#NULL!	#NULL!	#NULL!	-280.76	64.9864	#NULL!	#NULL!	-212.561	-142.553	-290.573	-490.543	#NULL!	#NULL!	578.244	-528.613	-100.945	5.13796	#NULL!	#NULL!	#NULL!	#NULL!	-32.0177	1.65741	#NULL!	#NULL!	-299.197	501.923
-28.4873	26.8342	189.101	-348.363	#NULL!	#NULL!	215.677	70.1555	197.485	773.586	#NULL!	#NULL!	130.62	-46.8743	491.542	-581.735	#NULL!	#NULL!	-9.74707	-28.4277	#NULL!	#NULL!	#NULL!	#NULL!	#NULL!	#NULL!	-293.572	71.1056	#NULL!	#NULL!	-218.964	-140.505	-294.852	-490.534	#NULL!	#NULL!	572.694	-528.602	-107.1	5.13796	#NULL!	#NULL!	#NULL!	#NULL!	-41.8653	1.65741	#NULL!	#NULL!	-308.492	501.989
-34.0183	26.8563	182.959	-347.171	#NULL!	#NULL!	210.761	70.1752	192.566	773.606	#NULL!	#NULL!	161.44	-43.5347	426.241	-581.38	#NULL!	#NULL!	-14.6754	-28.3985	#NULL!	#NULL!	#NULL!	#NULL!	#NULL!	#NULL!	-301.056	72.1361	#NULL!	#NULL!	-148.065	-138.348	-298.066	-491.544	#NULL!	#NULL!	567.761	-528.592	62.7807	9.7787	#NULL!	#NULL!	#NULL!	#NULL!	-36.9365	4.3645	#NULL!	#NULL!	-314.076	500.869
-63.5168	26.9744	178.04	-347.151	#NULL!	#NULL!	428.324	72.0242	188.87	772.453	#NULL!	#NULL!	157.128	-43.5091	412.072	-581.302	#NULL!	#NULL!	-18.3778	-29.5507	#NULL!	#NULL!	#NULL!	#NULL!	#NULL!	#NULL!	-302.109	76.2007	#NULL!	#NULL!	-210.406	-138.501	-302.345	-491.535	#NULL!	#NULL!	552.962	-528.563	12.3116	9.7787	#NULL!	#NULL!	#NULL!	#NULL!	-29.5451	7.45833	#NULL!	#NULL!	-321.505	502.08
-95.0622	27.4893	173.121	-347.131	#NULL!	#NULL!	421.562	71.6627	202.428	778.237	#NULL!	#NULL!	125.704	-44.4967	550.697	-579.708	#NULL!	#NULL!	-50.4122	-29.3605	#NULL!	#NULL!	#NULL!	#NULL!	#NULL!	#NULL!	-305.323	75.1915	#NULL!	#NULL!	-215.745	-137.47	-305.554	-491.529	#NULL!	#NULL!	548.029	-528.554	7.38995	10.9389	#NULL!	#NULL!	#NULL!	#NULL!	-35.6977	8.61851	#NULL!	#NULL!	-327.702	502.123
-102.848	27.1319	168.202	-347.111	#NULL!	#NULL!	283.699	72.6033	197.509	778.256	#NULL!	#NULL!	121.398	-43.297	524.823	-579.567	#NULL!	#NULL!	-30.6804	-25.955	#NULL!	#NULL!	#NULL!	#NULL!	#NULL!	#NULL!	-318.494	80.6343	#NULL!	#NULL!	-145.2	-134.636	-178.235	-488.735	#NULL!	#NULL!	543.096	-528.544	49.2574	19.0602	#NULL!	#NULL!	#NULL!	#NULL!	-40.0061	8.61851	#NULL!	#NULL!	-302.902	504.267
-112.681	27.1713	163.283	-347.092	#NULL!	#NULL!	277.137	71.0752	193.814	777.104	#NULL!	#NULL!	141.739	-41.0693	516.191	-580.695	#NULL!	#NULL!	-35.6088	-25.9257	#NULL!	#NULL!	#NULL!	#NULL!	#NULL!	#NULL!	-317.052	84.3555	#NULL!	#NULL!	-149.479	-135.638	-227.981	-488.636	#NULL!	#NULL!	538.163	-528.535	9.8776	24.8611	#NULL!	#NULL!	#NULL!	#NULL!	76.3212	9.7787	#NULL!	#NULL!	-291.735	506.507
-116.368	27.186	158.364	-347.072	#NULL!	#NULL!	270.992	71.0998	138.494	780.828	#NULL!	#NULL!	154.072	-38.7941	503.878	-579.453	#NULL!	#NULL!	-40.5372	-25.8965	#NULL!	#NULL!	#NULL!	#NULL!	#NULL!	#NULL!	-320.266	83.3462	#NULL!	#NULL!	-154.818	-134.608	-230.66	-489.646	#NULL!	#NULL!	533.23	-528.525	-2.43194	24.8611	#NULL!	#NULL!	#NULL!	#NULL!	-12.3074	9.7787	#NULL!	#NULL!	-296.693	506.541
-89.3182	29.4093	153.445	-347.052	#NULL!	#NULL!	236.582	72.4033	132.96	780.85	#NULL!	#NULL!	113.407	-39.7269	498.949	-579.426	#NULL!	#NULL!	-10.9548	-23.7237	#NULL!	#NULL!	#NULL!	#NULL!	#NULL!	#NULL!	-331.663	86.7543	#NULL!	#NULL!	-203.977	-134.461	-265.959	-488.56	#NULL!	#NULL!	528.297	-528.515	-2.42336	29.5018	#NULL!	#NULL!	#NULL!	#NULL!	-16.6136	10.9389	#NULL!	#NULL!	-314.043	506.663
-107.76	28.3173	150.979	-348.21	#NULL!	#NULL!	231.665	72.423	204.912	782.897	#NULL!	#NULL!	108.479	-39.6976	431.184	-579.057	#NULL!	#NULL!	-16.2796	-20.9522	#NULL!	#NULL!	#NULL!	#NULL!	#NULL!	#NULL!	-318.109	87.4044	#NULL!	#NULL!	-158.02	-133.584	-161.11	-486.737	#NULL!	#NULL!	518.43	-528.496	-7.34718	29.5018	#NULL!	#NULL!	#NULL!	#NULL!	-22.1551	9.7787	#NULL!	#NULL!	-326.437	506.75
-31.5453	30.3437	131.309	-346.964	#NULL!	#NULL!	226.749	72.4427	199.994	782.916	#NULL!	#NULL!	147.918	-37.5834	421.328	-579.003	#NULL!	#NULL!	-34.3503	-20.845	#NULL!	#NULL!	#NULL!	#NULL!	#NULL!	#NULL!	-327.729	89.4548	#NULL!	#NULL!	-211.45	-132.41	-164.319	-486.731	#NULL!	#NULL!	513.497	-528.487	-12.271	29.5018	#NULL!	#NULL!	#NULL!	#NULL!	81.2515	13.2592	#NULL!	#NULL!	-301.637	508.894
-35.2277	31.5242	112.248	-346.887	#NULL!	#NULL!	222.447	72.4599	140.978	785.488	#NULL!	#NULL!	142.99	-37.5541	415.167	-578.97	#NULL!	#NULL!	-40.5128	-21.1998	#NULL!	#NULL!	#NULL!	#NULL!	#NULL!	#NULL!	-332.004	90.4789	#NULL!	#NULL!	-215.728	-133.412	-182.506	-486.695	#NULL!	#NULL!	646.694	-527.587	-16.575	31.8222	#NULL!	#NULL!	#NULL!	#NULL!	-40.6151	12.0991	#NULL!	#NULL!	-305.974	508.925
-41.3781	30.3831	109.168	-348.042	#NULL!	#NULL!	207.083	72.5215	136.059	785.508	#NULL!	#NULL!	138.061	-37.5248	529.766	-577.244	#NULL!	#NULL!	-42.9831	-22.3593	#NULL!	#NULL!	#NULL!	#NULL!	#NULL!	#NULL!	-333.061	93.5279	#NULL!	#NULL!	-146.252	-130.575	-186.785	-486.686	#NULL!	#NULL!	641.76	-527.577	-48.7843	32.2089	#NULL!	#NULL!	#NULL!	#NULL!	0.0106669	14.4194	#NULL!	#NULL!	-291.709	511.142
-46.2946	30.4028	179.294	-342.486	#NULL!	#NULL!	434.478	73.9425	202.48	787.966	#NULL!	#NULL!	134.365	-37.5029	520.525	-577.194	#NULL!	#NULL!	-9.28557	-18.6454	#NULL!	#NULL!	#NULL!	#NULL!	#NULL!	#NULL!	-387.039	104.807	#NULL!	#NULL!	-202.892	-130.406	-191.065	-486.678	#NULL!	#NULL!	624.497	-526.385	-2.41478	34.1426	#NULL!	#NULL!	#NULL!	#NULL!	80.0269	16.7398	#NULL!	#NULL!	-297.906	511.186
-51.211	30.4224	174.375	-342.466	#NULL!	#NULL!	293.132	74.897	198.782	786.424	#NULL!	#NULL!	98.6425	-35.7252	492.803	-577.043	#NULL!	#NULL!	0.172666	-16.3531	#NULL!	#NULL!	#NULL!	#NULL!	#NULL!	#NULL!	-387.561	107.855	#NULL!	#NULL!	-207.162	-129.379	-194.274	-486.672	#NULL!	#NULL!	619.564	-526.375	-7.3386	34.1426	#NULL!	#NULL!	#NULL!	#NULL!	21.5631	20.2204	#NULL!	#NULL!	-316.494	511.702
-58.5856	30.452	169.456	-342.447	#NULL!	#NULL!	216.928	75.2022	141.003	790.158	#NULL!	#NULL!	129.455	-33.9511	426.271	-576.681	#NULL!	#NULL!	-17.0786	-16.6421	#NULL!	#NULL!	#NULL!	#NULL!	#NULL!	#NULL!	-390.771	107.861	#NULL!	#NULL!	-145.166	-126.519	-201.761	-486.318	#NULL!	#NULL!	614.631	-526.366	-12.2624	34.1426	#NULL!	#NULL!	#NULL!	#NULL!	44.3422	23.7009	#NULL!	#NULL!	-322.692	511.36
-62.2729	30.4667	164.537	-342.427	#NULL!	#NULL!	211.395	74.8357	137.313	790.173	#NULL!	#NULL!	91.254	-34.8985	409.021	-576.587	#NULL!	#NULL!	-21.391	-16.6165	#NULL!	#NULL!	#NULL!	#NULL!	#NULL!	#NULL!	-354.92	110.837	#NULL!	#NULL!	-202.875	-126.348	-207.112	-486.646	#NULL!	#NULL!	609.698	-526.356	-31.9577	34.1426	#NULL!	#NULL!	#NULL!	#NULL!	20.9562	24.8611	#NULL!	#NULL!	-327.65	511.394
-96.683	31.7703	159.618	-342.407	#NULL!	#NULL!	428.337	75.1328	203.732	792.241	#NULL!	#NULL!	87.5577	-34.8765	547.023	-576.163	#NULL!	#NULL!	-29.3975	-16.1775	#NULL!	#NULL!	#NULL!	#NULL!	#NULL!	#NULL!	-401.811	111.269	#NULL!	#NULL!	-141.409	-122.472	-210.856	-486.639	#NULL!	#NULL!	587.5	-525.927	-17.1841	35.3028	#NULL!	#NULL!	#NULL!	#NULL!	20.9648	29.5018	#NULL!	#NULL!	-330.135	510.253
-101.599	31.79	154.699	-342.387	#NULL!	#NULL!	423.425	76.3183	199.428	792.259	#NULL!	#NULL!	83.2515	-33.6768	542.718	-574.965	#NULL!	#NULL!	-34.334	-17.7138	#NULL!	#NULL!	#NULL!	#NULL!	#NULL!	#NULL!	-356.512	113.887	#NULL!	#NULL!	-198.049	-122.304	-214.604	-487.647	#NULL!	#NULL!	562.834	-525.879	-27.0296	36.4629	#NULL!	#NULL!	#NULL!	#NULL!	87.4556	39.9435	#NULL!	#NULL!	-305.329	513.556
-104.062	30.634	150.395	-342.37	#NULL!	#NULL!	419.124	76.3355	141.021	793.66	#NULL!	#NULL!	123.301	-32.7403	524.852	-574.868	#NULL!	#NULL!	-39.2624	-17.6846	#NULL!	#NULL!	#NULL!	#NULL!	#NULL!	#NULL!	-403.579	114.996	#NULL!	#NULL!	-200.725	-123.31	-274.509	-486.512	#NULL!	#NULL!	556.667	-526.253	-47.9558	36.4629	#NULL!	#NULL!	#NULL!	#NULL!	104.745	70.1083	#NULL!	#NULL!	-310.286	513.591
-115.12	31.8441	110.441	-339.875	#NULL!	#NULL!	392.698	76.4413	137.332	793.675	#NULL!	#NULL!	101.745	-31.4381	502.675	-574.747	#NULL!	#NULL!	-7.20769	-13.9609	#NULL!	#NULL!	#NULL!	#NULL!	#NULL!	#NULL!	-406.788	115.002	#NULL!	#NULL!	-137.66	-120.454	-294.835	-486.472	#NULL!	#NULL!	511.035	-526.164	-52.8796	36.4629	#NULL!	#NULL!	#NULL!	#NULL!	109.683	78.2296	#NULL!	#NULL!	-291.683	515.778
-118.807	31.8589	176.859	-337.806	#NULL!	#NULL!	285.761	75.7037	#NULL!	#NULL!	#NULL!	#NULL!	96.8167	-31.4089	497.746	-574.72	#NULL!	#NULL!	-13.3702	-14.3157	#NULL!	#NULL!	#NULL!	#NULL!	#NULL!	#NULL!	-408.911	119.069	#NULL!	#NULL!	-191.628	-120.293	-298.045	-486.466	#NULL!	#NULL!	604.77	-523.642	-61.0852	36.8497	#NULL!	#NULL!	#NULL!	#NULL!	225.543	159.442	#NULL!	#NULL!	-296.64	515.813
-100.351	36.448	171.94	-337.786	#NULL!	#NULL!	282.073	75.7185	#NULL!	#NULL!	#NULL!	#NULL!	117.158	-29.1812	431.206	-575.533	#NULL!	#NULL!	5.12339	-12.077	#NULL!	#NULL!	#NULL!	#NULL!	#NULL!	#NULL!	-412.647	121.108	#NULL!	#NULL!	-197.502	-119.261	-175.544	-484.678	#NULL!	#NULL!	598.603	-524.017	-3.63716	38.7833	#NULL!	#NULL!	#NULL!	#NULL!	229.86	164.083	#NULL!	#NULL!	-316.467	516.338
-104.653	36.4652	167.022	-337.767	#NULL!	#NULL!	243.978	77.4254	#NULL!	#NULL!	#NULL!	#NULL!	87.5882	-29.0057	422.181	-573.917	#NULL!	#NULL!	0.195019	-12.0478	#NULL!	#NULL!	#NULL!	#NULL!	#NULL!	#NULL!	-416.387	122.131	#NULL!	#NULL!	-136.578	-117.413	-261.663	-484.507	#NULL!	#NULL!	593.67	-524.007	-8.56097	38.7833	#NULL!	#NULL!	#NULL!	#NULL!	232.946	168.724	#NULL!	#NULL!	-322.666	515.995
-117.563	35.3512	162.102	-337.747	#NULL!	#NULL!	237.831	77.0614	#NULL!	#NULL!	#NULL!	#NULL!	77.7315	-28.9471	413.964	-574.264	#NULL!	#NULL!	-19.5185	-11.9307	#NULL!	#NULL!	#NULL!	#NULL!	#NULL!	#NULL!	-398.191	124.126	#NULL!	#NULL!	-184.665	-116.256	-265.942	-484.498	#NULL!	#NULL!	580.105	-523.594	-12.256	37.6231	#NULL!	#NULL!	#NULL!	#NULL!	239.114	176.072	#NULL!	#NULL!	-327.624	516.03
-121.25	35.3659	157.184	-337.727	#NULL!	#NULL!	234.138	75.9104	#NULL!	#NULL!	#NULL!	#NULL!	71.5649	-30.0847	405.34	-574.217	#NULL!	#NULL!	-24.4468	-11.9015	#NULL!	#NULL!	#NULL!	#NULL!	#NULL!	#NULL!	-421.723	125.189	#NULL!	#NULL!	-187.867	-115.232	-269.151	-484.492	#NULL!	#NULL!	573.937	-523.969	-31.5381	39.17	#NULL!	#NULL!	#NULL!	#NULL!	235.419	174.525	#NULL!	#NULL!	-331.342	516.056
-100.331	41.111	152.264	-337.707	#NULL!	#NULL!	229.222	75.9301	#NULL!	#NULL!	#NULL!	#NULL!	67.8747	-28.8886	529.795	-572.545	#NULL!	#NULL!	-29.3813	-13.0464	#NULL!	#NULL!	#NULL!	#NULL!	#NULL!	#NULL!	-379.449	129.167	#NULL!	#NULL!	-132.994	-112.013	-158.952	-482.341	#NULL!	#NULL!	569.004	-523.959	-81.1872	38.7833	#NULL!	#NULL!	#NULL!	#NULL!	241.582	179.166	#NULL!	#NULL!	-301.585	518.165
-105.247	41.1307	147.345	-337.688	#NULL!	#NULL!	224.31	77.1155	#NULL!	#NULL!	#NULL!	#NULL!	111.004	-27.9705	521.171	-572.498	#NULL!	#NULL!	-33.0776	-13.0244	#NULL!	#NULL!	#NULL!	#NULL!	#NULL!	#NULL!	-422.78	128.238	#NULL!	#NULL!	-184.29	-111.86	-163.768	-482.67	#NULL!	#NULL!	550.506	-523.537	-24.5591	41.1037	#NULL!	#NULL!	#NULL!	#NULL!	237.891	180.326	#NULL!	#NULL!	-306.542	518.2
-108.935	41.1454	135.663	-337.641	#NULL!	#NULL!	396.397	79.1466	#NULL!	#NULL!	#NULL!	#NULL!	106.076	-27.9412	492.833	-572.344	#NULL!	#NULL!	10.064	-9.75796	#NULL!	#NULL!	#NULL!	#NULL!	#NULL!	#NULL!	-445.216	135.391	#NULL!	#NULL!	-193.197	-112.172	-182.488	-482.294	#NULL!	#NULL!	544.339	-523.911	-49.1774	41.4904	#NULL!	#NULL!	#NULL!	#NULL!	245.294	189.607	#NULL!	#NULL!	-297.854	520.457
-129.215	41.2266	107.379	-337.527	#NULL!	#NULL!	305.441	79.1222	#NULL!	#NULL!	#NULL!	#NULL!	101.147	-27.912	409.053	-571.496	#NULL!	#NULL!	-4.72116	-9.67017	#NULL!	#NULL!	#NULL!	#NULL!	#NULL!	#NULL!	-796.637	138.121	#NULL!	#NULL!	-196.407	-113.177	-187.838	-482.622	#NULL!	#NULL!	539.406	-523.902	-55.3329	41.1037	#NULL!	#NULL!	#NULL!	#NULL!	242.83	188.447	#NULL!	#NULL!	-311.486	520.553
-101.54	45.7789	179.344	-333.146	#NULL!	#NULL!	300.525	79.1419	#NULL!	#NULL!	#NULL!	#NULL!	97.4632	-25.5417	538.435	-570.243	#NULL!	#NULL!	-9.64952	-9.64091	#NULL!	#NULL!	#NULL!	#NULL!	#NULL!	#NULL!	-397.062	138.343	#NULL!	#NULL!	-130.839	-107.961	-192.117	-482.613	#NULL!	#NULL!	534.472	-523.892	-60.2567	41.1037	#NULL!	#NULL!	#NULL!	#NULL!	246.534	194.248	#NULL!	#NULL!	-322.64	520.631
-106.457	45.7986	174.425	-333.126	#NULL!	#NULL!	295.603	77.9958	#NULL!	#NULL!	#NULL!	#NULL!	88.8447	-24.3163	533.506	-570.216	#NULL!	#NULL!	-14.5779	-9.61164	#NULL!	#NULL!	#NULL!	#NULL!	#NULL!	#NULL!	-416.319	138.381	#NULL!	#NULL!	-134.407	-109.303	-195.862	-482.606	#NULL!	#NULL!	529.539	-523.882	-63.9496	41.1037	#NULL!	#NULL!	#NULL!	#NULL!	249.004	198.889	#NULL!	#NULL!	-325.125	519.489
-111.373	45.8182	169.506	-333.106	#NULL!	#NULL!	219.405	79.8553	#NULL!	#NULL!	#NULL!	#NULL!	83.3003	-24.2833	524.884	-569.777	#NULL!	#NULL!	5.1498	-6.98895	#NULL!	#NULL!	#NULL!	#NULL!	#NULL!	#NULL!	-445.203	138.438	#NULL!	#NULL!	-179.998	-107.814	-198.54	-483.616	#NULL!	#NULL!	525.223	-523.874	-4.86168	42.2639	#NULL!	#NULL!	#NULL!	#NULL!	255.168	203.53	#NULL!	#NULL!	-329.457	520.679
-131.044	44.7312	164.587	-333.087	#NULL!	#NULL!	214.482	78.3206	#NULL!	#NULL!	#NULL!	#NULL!	68.5152	-24.1956	502.707	-569.656	#NULL!	#NULL!	-1.01269	-7.34377	#NULL!	#NULL!	#NULL!	#NULL!	#NULL!	#NULL!	-448.413	138.445	#NULL!	#NULL!	-185.7	-108.136	-207.095	-482.584	#NULL!	#NULL!	522.137	-525.027	-8.55454	42.2639	#NULL!	#NULL!	#NULL!	#NULL!	251.473	202.369	#NULL!	#NULL!	-304.037	522.818
-116.688	48.5596	159.668	-333.067	#NULL!	#NULL!	418.529	81.0009	#NULL!	#NULL!	#NULL!	#NULL!	56.8042	-25.3002	496.544	-570.014	#NULL!	#NULL!	-19.492	-6.84264	#NULL!	#NULL!	#NULL!	#NULL!	#NULL!	#NULL!	-454.831	138.457	#NULL!	#NULL!	-191.043	-108.12	-276.632	-482.445	#NULL!	#NULL!	515.357	-523.855	-29.4808	42.2639	#NULL!	#NULL!	#NULL!	#NULL!	176.402	211.651	#NULL!	#NULL!	-315.811	522.901
-110.124	50.4763	154.749	-333.047	#NULL!	#NULL!	414.227	81.0182	#NULL!	#NULL!	#NULL!	#NULL!	51.8819	-24.0968	489.767	-569.978	#NULL!	#NULL!	-25.0385	-7.20111	#NULL!	#NULL!	#NULL!	#NULL!	#NULL!	#NULL!	-401.333	140.382	#NULL!	#NULL!	-126.909	-105.267	-295.888	-482.407	#NULL!	#NULL!	622.04	-521.744	-82.4096	43.4241	#NULL!	#NULL!	#NULL!	#NULL!	263.804	213.971	#NULL!	#NULL!	-299.067	525.101
-115.036	51.6617	149.83	-333.028	#NULL!	#NULL!	403.779	81.06	#NULL!	#NULL!	#NULL!	#NULL!	93.7791	-23.1714	421.386	-569.605	#NULL!	#NULL!	12.5525	-5.07589	#NULL!	#NULL!	#NULL!	#NULL!	#NULL!	#NULL!	-348.887	146.372	#NULL!	#NULL!	-180.339	-104.093	-299.097	-482.401	#NULL!	#NULL!	617.724	-521.736	-86.718	43.4241	#NULL!	#NULL!	#NULL!	#NULL!	267.507	219.772	#NULL!	#NULL!	-311.045	525.571
-119.952	51.6814	144.911	-333.008	#NULL!	#NULL!	247.683	81.685	#NULL!	#NULL!	#NULL!	#NULL!	62.3669	-21.8106	416.458	-569.578	#NULL!	#NULL!	-7.16095	-4.95884	#NULL!	#NULL!	#NULL!	#NULL!	#NULL!	#NULL!	-352.096	146.378	#NULL!	#NULL!	-185.683	-104.077	-174.992	-480.616	#NULL!	#NULL!	612.174	-521.725	-95.3346	43.4241	#NULL!	#NULL!	#NULL!	#NULL!	268.747	224.413	#NULL!	#NULL!	-323.853	525.275
-125.478	52.8693	135.073	-332.969	#NULL!	#NULL!	242.767	81.7047	#NULL!	#NULL!	#NULL!	#NULL!	17.3955	-21.5436	399.201	-570.659	#NULL!	#NULL!	-12.0893	-4.92957	#NULL!	#NULL!	#NULL!	#NULL!	#NULL!	#NULL!	-397.559	147.484	#NULL!	#NULL!	-123.691	-102.233	-260.576	-480.446	#NULL!	#NULL!	587.508	-521.677	-46.7098	44.5842	#NULL!	#NULL!	#NULL!	#NULL!	274.086	227.12	#NULL!	#NULL!	-330.461	525.708
-139.613	52.9259	109.248	-332.865	#NULL!	#NULL!	239.074	80.5537	#NULL!	#NULL!	#NULL!	#NULL!	7.5327	-22.6593	411.547	-566.81	#NULL!	#NULL!	7.63634	-2.69827	#NULL!	#NULL!	#NULL!	#NULL!	#NULL!	#NULL!	-407.187	147.503	#NULL!	#NULL!	-129.568	-102.215	-280.901	-480.067	#NULL!	#NULL!	562.843	-521.629	-50.4027	44.5842	#NULL!	#NULL!	#NULL!	#NULL!	276.146	231.761	#NULL!	#NULL!	-304.009	527.84
-110.105	55.1393	140.004	-330.653	#NULL!	#NULL!	408.706	83.3718	#NULL!	#NULL!	#NULL!	#NULL!	83.9407	-19.5903	406.608	-568.35	#NULL!	#NULL!	2.70797	-2.66901	#NULL!	#NULL!	#NULL!	#NULL!	#NULL!	#NULL!	-430.192	146.534	#NULL!	#NULL!	-176.054	-101.738	-155.727	-478.623	#NULL!	#NULL!	557.91	-521.62	-63.9432	44.5842	#NULL!	#NULL!	#NULL!	#NULL!	271.221	231.374	#NULL!	#NULL!	-318.881	527.944
-113.782	57.4855	184.287	-328.496	#NULL!	#NULL!	398.873	83.4112	#NULL!	#NULL!	#NULL!	#NULL!	71.6198	-19.5172	534.76	-566.698	#NULL!	#NULL!	-2.22039	-2.63975	#NULL!	#NULL!	#NULL!	#NULL!	#NULL!	#NULL!	-433.401	146.54	#NULL!	#NULL!	-181.391	-100.031	-162.146	-478.61	#NULL!	#NULL!	634.378	-519.451	-80.7591	48.4515	#NULL!	#NULL!	#NULL!	#NULL!	283.535	233.694	#NULL!	#NULL!	-311.434	529.823
-126.481	57.925	179.368	-328.476	#NULL!	#NULL!	393.957	83.4308	#NULL!	#NULL!	#NULL!	#NULL!	66.6914	-19.4879	529.839	-565.497	#NULL!	#NULL!	-18.2376	-2.54464	#NULL!	#NULL!	#NULL!	#NULL!	#NULL!	#NULL!	-440.89	146.555	#NULL!	#NULL!	-127.948	-98.1613	-180.333	-478.574	#NULL!	#NULL!	607.245	-519.398	-84.8651	46.9046	#NULL!	#NULL!	#NULL!	#NULL!	278.614	234.855	#NULL!	#NULL!	-331.27	528.804
-140.822	57.5938	174.449	-328.456	#NULL!	#NULL!	390.269	83.4456	#NULL!	#NULL!	#NULL!	#NULL!	50.6681	-20.567	524.911	-565.47	#NULL!	#NULL!	-22.5499	-2.51904	#NULL!	#NULL!	#NULL!	#NULL!	#NULL!	#NULL!	-460.142	147.609	#NULL!	#NULL!	-130.09	-99.1696	-184.612	-478.566	#NULL!	#NULL!	602.312	-519.388	-98.4034	48.0648	#NULL!	#NULL!	#NULL!	#NULL!	273.077	236.015	#NULL!	#NULL!	-335.601	529.993
-111.314	59.8072	169.53	-328.437	#NULL!	#NULL!	312.831	82.5899	#NULL!	#NULL!	#NULL!	#NULL!	42.6656	-19.3452	519.982	-565.443	#NULL!	#NULL!	-26.8683	-3.66761	#NULL!	#NULL!	#NULL!	#NULL!	#NULL!	#NULL!	-464.421	147.617	#NULL!	#NULL!	-171.768	-99.0455	-188.891	-478.557	#NULL!	#NULL!	597.379	-519.379	-102.096	48.0648	#NULL!	#NULL!	#NULL!	#NULL!	283.544	238.335	#NULL!	#NULL!	-300.274	530.904
-117.448	62.5518	164.611	-328.417	#NULL!	#NULL!	307.914	82.6096	#NULL!	#NULL!	#NULL!	#NULL!	37.1151	-20.4865	515.054	-565.416	#NULL!	#NULL!	-31.7967	-3.63835	#NULL!	#NULL!	#NULL!	#NULL!	#NULL!	#NULL!	-402.364	149.525	#NULL!	#NULL!	-175.505	-98.0198	-193.17	-478.549	#NULL!	#NULL!	592.446	-519.369	-107.018	49.225	#NULL!	#NULL!	#NULL!	#NULL!	284.783	242.976	#NULL!	#NULL!	-306.462	532.493
-122.371	61.0172	159.692	-328.397	#NULL!	#NULL!	221.883	84.5084	#NULL!	#NULL!	#NULL!	#NULL!	32.1867	-20.4572	505.19	-566.537	#NULL!	#NULL!	12.5769	-0.379185	#NULL!	#NULL!	#NULL!	#NULL!	#NULL!	#NULL!	-465.474	151.682	#NULL!	#NULL!	-112.983	-97.1912	-206.543	-478.522	#NULL!	#NULL!	582.58	-519.35	-81.1637	51.5453	#NULL!	#NULL!	#NULL!	#NULL!	193.708	251.097	#NULL!	#NULL!	-316.385	531.017
-128.512	62.2075	154.773	-328.377	#NULL!	#NULL!	218.19	82.9689	#NULL!	#NULL!	#NULL!	#NULL!	27.2584	-20.428	500.262	-566.51	#NULL!	#NULL!	-7.13657	-0.262133	#NULL!	#NULL!	#NULL!	#NULL!	#NULL!	#NULL!	-468.683	151.688	#NULL!	#NULL!	-168.015	-96.0128	-253.079	-478.43	#NULL!	#NULL!	577.647	-519.34	-98.3949	52.7055	#NULL!	#NULL!	#NULL!	#NULL!	290.96	254.578	#NULL!	#NULL!	-312.647	534.468
-132.199	62.2223	149.854	-328.358	#NULL!	#NULL!	414.861	85.6787	#NULL!	#NULL!	#NULL!	#NULL!	22.33	-20.3987	495.341	-565.309	#NULL!	#NULL!	-12.0649	-0.23287	#NULL!	#NULL!	#NULL!	#NULL!	#NULL!	#NULL!	-402.352	152.572	#NULL!	#NULL!	-129.535	-94.0981	-257.358	-478.421	#NULL!	#NULL!	572.714	-519.331	-102.088	52.7055	#NULL!	#NULL!	#NULL!	#NULL!	293.43	259.218	#NULL!	#NULL!	-334.955	534.624
-142.037	61.0959	144.935	-328.338	#NULL!	#NULL!	403.794	84.5572	#NULL!	#NULL!	#NULL!	#NULL!	12.4733	-20.3402	422.648	-564.913	#NULL!	#NULL!	7.66073	1.99843	#NULL!	#NULL!	#NULL!	#NULL!	#NULL!	#NULL!	-415.711	155.645	#NULL!	#NULL!	-171.751	-94.9871	-293.731	-478.349	#NULL!	#NULL!	567.781	-519.321	-59.6155	55.0259	#NULL!	#NULL!	#NULL!	#NULL!	288.506	259.218	#NULL!	#NULL!	-337.44	533.483
-146.948	62.2814	136.327	-328.303	#NULL!	#NULL!	315.918	86.0748	#NULL!	#NULL!	#NULL!	#NULL!	76.5624	-16.8067	417.719	-564.886	#NULL!	#NULL!	2.73236	2.02769	#NULL!	#NULL!	#NULL!	#NULL!	#NULL!	#NULL!	-466.527	155.746	#NULL!	#NULL!	-161.051	-91.6369	-297.476	-478.342	#NULL!	#NULL!	552.981	-519.292	-30.6517	74.749	#NULL!	#NULL!	#NULL!	#NULL!	293.439	264.246	#NULL!	#NULL!	-303.959	536.725
-151.25	62.2986	109.888	-328.197	#NULL!	#NULL!	259.176	86.6906	#NULL!	#NULL!	#NULL!	#NULL!	63.6234	-17.1212	411.573	-562.503	#NULL!	#NULL!	-3.4281	2.06427	#NULL!	#NULL!	#NULL!	#NULL!	#NULL!	#NULL!	-470.271	155.754	#NULL!	#NULL!	-165.331	-92.977	-174.44	-476.555	#NULL!	#NULL!	548.048	-519.283	-44.1771	82.8703	#NULL!	#NULL!	#NULL!	#NULL!	289.744	262.699	#NULL!	#NULL!	-308.916	536.759
-118.659	66.8311	140.029	-325.983	#NULL!	#NULL!	241.557	86.3726	#NULL!	#NULL!	#NULL!	#NULL!	46.9901	-17.0225	529.869	-560.798	#NULL!	#NULL!	-20.6835	0.992515	#NULL!	#NULL!	#NULL!	#NULL!	#NULL!	#NULL!	-465.975	159.808	#NULL!	#NULL!	-111.883	-89.754	-197.441	-476.509	#NULL!	#NULL!	543.115	-519.273	-45.3995	87.5111	#NULL!	#NULL!	#NULL!	#NULL!	198.66	266.18	#NULL!	#NULL!	-313.861	539.112
-122.347	66.8459	179.393	-323.806	#NULL!	#NULL!	398.888	86.9084	#NULL!	#NULL!	#NULL!	#NULL!	69.18	-14.8058	524.94	-560.771	#NULL!	#NULL!	12.6033	4.70891	#NULL!	#NULL!	#NULL!	#NULL!	#NULL!	#NULL!	-470.793	158.802	#NULL!	#NULL!	-127.91	-89.0298	-201.185	-476.502	#NULL!	#NULL!	538.182	-519.264	-79.8534	94.4722	#NULL!	#NULL!	#NULL!	#NULL!	298.371	268.5	#NULL!	#NULL!	-318.198	539.142
-130.955	65.7146	174.474	-323.786	#NULL!	#NULL!	393.971	86.9281	#NULL!	#NULL!	#NULL!	#NULL!	27.2889	-14.5571	520.012	-560.744	#NULL!	#NULL!	-9.58246	3.27502	#NULL!	#NULL!	#NULL!	#NULL!	#NULL!	#NULL!	-481.432	173.042	#NULL!	#NULL!	-154.623	-87.9357	-278.031	-476.01	#NULL!	#NULL!	533.249	-519.254	-79.8448	99.1129	#NULL!	#NULL!	#NULL!	#NULL!	293.447	268.5	#NULL!	#NULL!	-328.113	539.212
-146.934	65.7786	169.555	-323.767	#NULL!	#NULL!	389.055	86.9477	#NULL!	#NULL!	#NULL!	#NULL!	72.8884	-12.4794	516.308	-561.899	#NULL!	#NULL!	-13.2726	4.47115	#NULL!	#NULL!	#NULL!	#NULL!	#NULL!	#NULL!	-484.637	174.064	#NULL!	#NULL!	-158.902	-88.9376	-286.234	-476.333	#NULL!	#NULL!	528.316	-519.244	-49.0452	113.035	#NULL!	#NULL!	#NULL!	#NULL!	289.752	267.34	#NULL!	#NULL!	-335.549	539.264
-153.074	66.9689	164.636	-323.747	#NULL!	#NULL!	384.143	88.1332	#NULL!	#NULL!	#NULL!	#NULL!	64.6765	-12.0392	495.37	-560.61	#NULL!	#NULL!	29.8628	6.56345	#NULL!	#NULL!	#NULL!	#NULL!	#NULL!	#NULL!	-514.562	181.232	#NULL!	#NULL!	-162.104	-87.9135	-290.513	-476.324	#NULL!	#NULL!	524.616	-519.237	-53.969	113.035	#NULL!	#NULL!	#NULL!	#NULL!	298.38	273.141	#NULL!	#NULL!	-303.933	541.36
-155.537	65.813	159.717	-323.727	#NULL!	#NULL!	379.227	88.1529	#NULL!	#NULL!	#NULL!	#NULL!	27.3071	-11.0345	491.674	-560.59	#NULL!	#NULL!	5.22093	6.70976	#NULL!	#NULL!	#NULL!	#NULL!	#NULL!	#NULL!	-524.16	188.361	#NULL!	#NULL!	-107.593	-86.0465	-156.78	-474.558	#NULL!	#NULL!	513.516	-519.216	-83.5119	113.035	#NULL!	#NULL!	#NULL!	#NULL!	293.456	273.141	#NULL!	#NULL!	-308.271	541.391
-122.327	71.5089	154.798	-323.707	#NULL!	#NULL!	330.064	88.7383	#NULL!	#NULL!	#NULL!	#NULL!	-42.916	-9.44338	420.213	-560.201	#NULL!	#NULL!	0.286466	5.56485	#NULL!	#NULL!	#NULL!	#NULL!	#NULL!	#NULL!	-527.904	188.368	#NULL!	#NULL!	-112.936	-86.0306	-161.059	-474.55	#NULL!	#NULL!	631.299	-517.127	-93.3488	118.836	#NULL!	#NULL!	#NULL!	#NULL!	298.389	278.168	#NULL!	#NULL!	-323.142	541.495
-127.243	71.5286	149.879	-323.688	#NULL!	#NULL!	324.532	88.3719	#NULL!	#NULL!	#NULL!	#NULL!	-46.6184	-10.5956	415.284	-560.174	#NULL!	#NULL!	-3.40981	5.5868	#NULL!	#NULL!	#NULL!	#NULL!	#NULL!	#NULL!	-446.591	190.238	#NULL!	#NULL!	-116.142	-86.021	-180.315	-474.512	#NULL!	#NULL!	619.583	-517.104	-60.8837	145.907	#NULL!	#NULL!	#NULL!	#NULL!	294.693	276.621	#NULL!	#NULL!	-318.792	543.782
-156.127	71.6442	144.96	-323.668	#NULL!	#NULL!	320.225	87.2233	#NULL!	#NULL!	#NULL!	#NULL!	-52.7727	-9.38486	527.434	-556.085	#NULL!	#NULL!	20.6343	8.96667	#NULL!	#NULL!	#NULL!	#NULL!	#NULL!	#NULL!	-524.143	192.423	#NULL!	#NULL!	-150.338	-85.581	-184.595	-474.503	#NULL!	#NULL!	612.184	-516.703	-67.4495	145.52	#NULL!	#NULL!	#NULL!	#NULL!	303.321	282.422	#NULL!	#NULL!	-329.946	543.861
-137.065	74.288	109.291	-324.692	#NULL!	#NULL!	231.734	88.7434	#NULL!	#NULL!	#NULL!	#NULL!	64.2882	-7.7315	522.505	-556.058	#NULL!	#NULL!	15.0899	8.99959	#NULL!	#NULL!	#NULL!	#NULL!	#NULL!	#NULL!	-528.422	192.432	#NULL!	#NULL!	-155.675	-83.8741	-188.874	-474.495	#NULL!	#NULL!	587.519	-516.655	-74.2197	145.52	#NULL!	#NULL!	#NULL!	#NULL!	299.012	282.422	#NULL!	#NULL!	-303.907	545.996
-124.765	76.1817	140.055	-320.924	#NULL!	#NULL!	226.818	88.7631	#NULL!	#NULL!	#NULL!	#NULL!	56.8977	-7.29621	518.802	-557.213	#NULL!	#NULL!	10.1615	9.02885	#NULL!	#NULL!	#NULL!	#NULL!	#NULL!	#NULL!	-531.632	192.438	#NULL!	#NULL!	-161.552	-83.8566	-193.153	-474.486	#NULL!	#NULL!	562.853	-516.607	-100.684	145.907	#NULL!	#NULL!	#NULL!	#NULL!	304.56	287.063	#NULL!	#NULL!	-308.245	546.026
-129.682	76.2014	136.358	-322.466	#NULL!	#NULL!	221.901	88.7828	#NULL!	#NULL!	#NULL!	#NULL!	-58.305	-7.00358	495.399	-555.911	#NULL!	#NULL!	32.3513	11.2455	#NULL!	#NULL!	#NULL!	#NULL!	#NULL!	#NULL!	-444.969	194.297	#NULL!	#NULL!	-106.511	-83.0058	-204.925	-475.478	#NULL!	#NULL!	556.686	-516.982	-78.5259	146.68	#NULL!	#NULL!	#NULL!	#NULL!	300.865	285.903	#NULL!	#NULL!	-322.497	546.126
-157.951	76.3146	181.871	-320.313	#NULL!	#NULL!	337.442	89.4859	#NULL!	#NULL!	#NULL!	#NULL!	-70.0098	-6.93408	490.471	-555.884	#NULL!	#NULL!	27.423	11.2748	#NULL!	#NULL!	#NULL!	#NULL!	#NULL!	#NULL!	-449.249	194.306	#NULL!	#NULL!	-116.129	-82.9772	-253.062	-474.367	#NULL!	#NULL!	508.588	-516.888	-82.2188	146.68	#NULL!	#NULL!	#NULL!	#NULL!	314.002	289.77	#NULL!	#NULL!	-311.33	548.366
-133.359	78.5476	175.728	-319.121	#NULL!	#NULL!	312.867	91.1387	#NULL!	#NULL!	#NULL!	#NULL!	-77.4024	-6.89019	416.546	-555.481	#NULL!	#NULL!	6.47131	10.225	#NULL!	#NULL!	#NULL!	#NULL!	#NULL!	#NULL!	-499.534	193.39	#NULL!	#NULL!	-148.185	-81.8672	-294.788	-475.3	#NULL!	#NULL!	504.888	-516.881	-92.0664	146.68	#NULL!	#NULL!	#NULL!	#NULL!	303.355	300.985	#NULL!	#NULL!	-328.265	548.871
-140.119	78.5747	170.809	-319.102	#NULL!	#NULL!	263.701	90.947	#NULL!	#NULL!	#NULL!	#NULL!	50.3387	-4.90885	524.999	-551.373	#NULL!	#NULL!	34.2239	15.9313	#NULL!	#NULL!	#NULL!	#NULL!	#NULL!	#NULL!	-508.088	194.423	#NULL!	#NULL!	-151.926	-81.856	-171.749	-472.498	#NULL!	#NULL!	604.789	-514.758	-51.4363	151.321	#NULL!	#NULL!	#NULL!	#NULL!	323.055	303.305	#NULL!	#NULL!	-306.359	550.649
-127.204	80.8545	165.89	-319.082	#NULL!	#NULL!	258.784	90.9666	#NULL!	#NULL!	#NULL!	#NULL!	-63.8372	-4.62231	521.303	-551.353	#NULL!	#NULL!	41.0369	22.9361	#NULL!	#NULL!	#NULL!	#NULL!	#NULL!	#NULL!	-454.589	196.348	#NULL!	#NULL!	-156.731	-80.8271	-174.962	-473.507	#NULL!	#NULL!	599.855	-514.748	-97.5949	152.481	#NULL!	#NULL!	#NULL!	#NULL!	318.746	303.305	#NULL!	#NULL!	-317.513	550.727
-161.619	80.9923	160.971	-319.062	#NULL!	#NULL!	253.868	90.9863	#NULL!	#NULL!	#NULL!	#NULL!	-83.5507	-4.50526	494.197	-551.205	#NULL!	#NULL!	54.6022	25.2039	#NULL!	#NULL!	#NULL!	#NULL!	#NULL!	#NULL!	-524.125	196.824	#NULL!	#NULL!	-161.001	-79.7998	-195.284	-472.451	#NULL!	#NULL!	594.922	-514.738	-103.132	153.642	#NULL!	#NULL!	#NULL!	#NULL!	303.363	305.626	#NULL!	#NULL!	-319.998	549.585
-132.111	83.2057	156.052	-319.042	#NULL!	#NULL!	246.495	91.4044	#NULL!	#NULL!	#NULL!	#NULL!	-89.7111	-4.46868	491.725	-552.366	#NULL!	#NULL!	49.6738	25.2332	#NULL!	#NULL!	#NULL!	#NULL!	#NULL!	#NULL!	-529.475	196.496	#NULL!	#NULL!	-137.486	-78.8551	-273.38	-472.296	#NULL!	#NULL!	580.123	-514.71	-72.3497	158.282	#NULL!	#NULL!	#NULL!	#NULL!	321.217	307.946	#NULL!	#NULL!	-310.684	552.997
-141.329	83.2426	151.133	-319.023	#NULL!	#NULL!	240.348	91.0405	#NULL!	#NULL!	#NULL!	#NULL!	-98.3337	-4.02608	419.039	-550.796	#NULL!	#NULL!	44.7454	25.2625	#NULL!	#NULL!	#NULL!	#NULL!	#NULL!	#NULL!	-533.754	196.505	#NULL!	#NULL!	-149.592	-77.4663	-279.798	-472.283	#NULL!	#NULL!	575.807	-514.701	-100.647	166.404	#NULL!	#NULL!	#NULL!	#NULL!	324.914	310.267	#NULL!	#NULL!	-323.704	551.929
-128.413	85.5224	146.214	-319.003	#NULL!	#NULL!	235.431	91.0601	#NULL!	#NULL!	#NULL!	#NULL!	56.9139	-4.16508	414.727	-550.772	#NULL!	#NULL!	41.0552	26.4586	#NULL!	#NULL!	#NULL!	#NULL!	#NULL!	#NULL!	-535.898	195.494	#NULL!	#NULL!	-105.947	-75.9052	-281.942	-473.294	#NULL!	#NULL!	570.257	-514.69	-106.752	193.088	#NULL!	#NULL!	#NULL!	#NULL!	304.601	309.106	#NULL!	#NULL!	-329.274	553.127
-137.015	85.9454	106.862	-318.845	#NULL!	#NULL!	349.743	91.7682	#NULL!	#NULL!	#NULL!	#NULL!	34.7363	-4.03339	407.131	-550.339	#NULL!	#NULL!	57.0907	29.886	#NULL!	#NULL!	#NULL!	#NULL!	#NULL!	#NULL!	-398.955	197.253	#NULL!	#NULL!	-133.733	-75.8225	-287.287	-472.268	#NULL!	#NULL!	550.524	-514.652	-80.8906	199.275	#NULL!	#NULL!	#NULL!	#NULL!	332.321	321.868	#NULL!	#NULL!	-306.34	554.125
-163.443	85.6627	136.389	-316.628	#NULL!	#NULL!	328.853	93.0176	#NULL!	#NULL!	#NULL!	#NULL!	31.04	-4.01145	527.492	-546.687	#NULL!	#NULL!	53.3944	29.908	#NULL!	#NULL!	#NULL!	#NULL!	#NULL!	#NULL!	-458.864	197.372	#NULL!	#NULL!	-141.214	-75.8002	-291.031	-472.261	#NULL!	#NULL!	545.591	-514.642	-112.896	198.889	#NULL!	#NULL!	#NULL!	#NULL!	335.407	326.509	#NULL!	#NULL!	-316.255	554.195
-144.38	88.3064	133.923	-317.786	#NULL!	#NULL!	323.937	93.0373	#NULL!	#NULL!	#NULL!	#NULL!	-55.8164	-2.32151	522.564	-546.66	#NULL!	#NULL!	47.2279	28.7704	#NULL!	#NULL!	#NULL!	#NULL!	#NULL!	#NULL!	-517.699	198.504	#NULL!	#NULL!	-137.465	-73.7821	-158.902	-470.492	#NULL!	#NULL!	541.891	-514.635	-117.204	198.889	#NULL!	#NULL!	#NULL!	#NULL!	331.714	326.509	#NULL!	#NULL!	-319.973	554.221
-167.725	90.3429	170.834	-314.432	#NULL!	#NULL!	307.344	93.1037	#NULL!	#NULL!	#NULL!	#NULL!	-113.115	-3.15551	491.146	-546.489	#NULL!	#NULL!	54.6509	34.5973	#NULL!	#NULL!	#NULL!	#NULL!	#NULL!	#NULL!	-541.235	198.551	#NULL!	#NULL!	-146.014	-73.7567	-162.647	-470.484	#NULL!	#NULL!	529.559	-514.611	-88.2727	201.209	#NULL!	#NULL!	#NULL!	#NULL!	335.413	329.99	#NULL!	#NULL!	-311.278	557.637
-141.909	91.4053	165.915	-314.412	#NULL!	#NULL!	298.121	91.9749	#NULL!	#NULL!	#NULL!	#NULL!	47.0755	-0.584026	417.836	-546.09	#NULL!	#NULL!	50.9485	33.4451	#NULL!	#NULL!	#NULL!	#NULL!	#NULL!	#NULL!	-406.431	200.315	#NULL!	#NULL!	-149.755	-73.7455	-178.159	-470.454	#NULL!	#NULL!	525.242	-514.603	-91.9656	201.209	#NULL!	#NULL!	#NULL!	#NULL!	308.345	336.951	#NULL!	#NULL!	-323.669	558.11
-146.82	92.5907	160.996	-314.392	#NULL!	#NULL!	293.824	93.1579	#NULL!	#NULL!	#NULL!	#NULL!	38.4447	-1.70699	409.212	-546.043	#NULL!	#NULL!	57.7555	39.2758	#NULL!	#NULL!	#NULL!	#NULL!	#NULL!	#NULL!	-521.612	200.882	#NULL!	#NULL!	-97.9152	-71.8706	-182.442	-471.461	#NULL!	#NULL!	513.526	-514.58	-79.6518	203.53	#NULL!	#NULL!	#NULL!	#NULL!	225.874	338.111	#NULL!	#NULL!	-329.868	557.767
-151.737	92.6104	156.077	-314.372	#NULL!	#NULL!	289.517	92.0093	#NULL!	#NULL!	#NULL!	#NULL!	-41.6412	-1.23147	404.283	-546.016	#NULL!	#NULL!	68.2405	41.5619	#NULL!	#NULL!	#NULL!	#NULL!	#NULL!	#NULL!	-538.017	200.576	#NULL!	#NULL!	-103.263	-72.8693	-186.717	-470.437	#NULL!	#NULL!	630.69	-513.649	-83.3468	202.369	#NULL!	#NULL!	#NULL!	#NULL!	227.111	341.591	#NULL!	#NULL!	-332.353	556.626
-156.039	92.6276	151.158	-314.353	#NULL!	#NULL!	231.754	93.4064	#NULL!	#NULL!	#NULL!	#NULL!	-46.5696	-1.2022	532.435	-544.365	#NULL!	#NULL!	67.0267	45.0918	#NULL!	#NULL!	#NULL!	#NULL!	#NULL!	#NULL!	-541.752	202.615	#NULL!	#NULL!	-106.999	-71.8435	-190.996	-470.428	#NULL!	#NULL!	619.593	-512.468	-117.196	203.53	#NULL!	#NULL!	#NULL!	#NULL!	345.921	354.353	#NULL!	#NULL!	-316.22	560.376
-173.04	93.0843	146.239	-314.333	#NULL!	#NULL!	319.03	95.3885	#NULL!	#NULL!	#NULL!	#NULL!	-51.498	-1.17294	527.521	-541.988	#NULL!	#NULL!	81.8687	55.963	#NULL!	#NULL!	#NULL!	#NULL!	#NULL!	#NULL!	-544.414	205.667	#NULL!	#NULL!	-132.647	-71.7672	-255.185	-470.3	#NULL!	#NULL!	614.66	-512.459	-79.6024	230.214	#NULL!	#NULL!	#NULL!	#NULL!	350.247	363.635	#NULL!	#NULL!	-336.049	560.515
-146.801	97.2537	105.657	-314.17	#NULL!	#NULL!	312.88	94.2473	#NULL!	#NULL!	#NULL!	#NULL!	-61.9647	0.0634169	522.593	-541.961	#NULL!	#NULL!	51.0766	58.1028	#NULL!	#NULL!	#NULL!	#NULL!	#NULL!	#NULL!	-564.672	221.957	#NULL!	#NULL!	-141.73	-71.402	-261.602	-469.949	#NULL!	#NULL!	609.726	-512.449	-88.2062	237.175	#NULL!	#NULL!	#NULL!	#NULL!	233.93	368.276	#NULL!	#NULL!	-341.009	560.163
-151.717	97.2733	137.645	-311.574	#NULL!	#NULL!	255.117	95.6444	#NULL!	#NULL!	#NULL!	#NULL!	-83.5263	0.191442	518.281	-541.938	#NULL!	#NULL!	86.8194	60.239	#NULL!	#NULL!	#NULL!	#NULL!	#NULL!	#NULL!	-598.273	245.383	#NULL!	#NULL!	-95.7609	-67.8185	-264.817	-471.297	#NULL!	#NULL!	589.994	-512.411	-128.819	241.816	#NULL!	#NULL!	#NULL!	#NULL!	321.946	369.436	#NULL!	#NULL!	-323.643	562.745
-155.404	97.2881	133.948	-313.116	#NULL!	#NULL!	250.2	95.6641	#NULL!	#NULL!	#NULL!	#NULL!	-100.775	0.293863	488.095	-541.773	#NULL!	#NULL!	81.8911	60.2683	#NULL!	#NULL!	#NULL!	#NULL!	#NULL!	#NULL!	-507.298	255.359	#NULL!	#NULL!	-105.383	-68.8045	-167.452	-468.443	#NULL!	#NULL!	585.061	-512.401	-134.929	266.18	#NULL!	#NULL!	#NULL!	#NULL!	235.783	371.756	#NULL!	#NULL!	-329.841	562.403
-176.299	97.3718	168.399	-309.752	#NULL!	#NULL!	245.284	95.6838	#NULL!	#NULL!	#NULL!	#NULL!	-106.936	0.330441	418.482	-541.394	#NULL!	#NULL!	51.101	62.7995	#NULL!	#NULL!	#NULL!	#NULL!	#NULL!	#NULL!	-506.746	259.42	#NULL!	#NULL!	-140.111	-67.6865	-170.666	-469.453	#NULL!	#NULL!	565.328	-512.363	-89.3815	267.34	#NULL!	#NULL!	#NULL!	#NULL!	324.416	374.077	#NULL!	#NULL!	-316.196	564.625
-179.362	99.7156	163.48	-309.732	#NULL!	#NULL!	241.592	94.5328	#NULL!	#NULL!	#NULL!	#NULL!	-118.641	0.399941	409.241	-541.344	#NULL!	#NULL!	88.692	64.9247	#NULL!	#NULL!	#NULL!	#NULL!	#NULL!	#NULL!	-507.799	263.485	#NULL!	#NULL!	-142.787	-68.6932	-194.732	-468.389	#NULL!	#NULL!	560.395	-512.353	-99.2119	276.621	#NULL!	#NULL!	#NULL!	#NULL!	238.258	378.717	#NULL!	#NULL!	-334.786	564.755
-54.5981	101.547	159.176	-309.715	#NULL!	#NULL!	236.675	94.5525	#NULL!	#NULL!	#NULL!	#NULL!	42.1532	0.619413	404.313	-541.317	#NULL!	#NULL!	94.2628	69.9799	#NULL!	#NULL!	#NULL!	#NULL!	#NULL!	#NULL!	-509.943	262.474	#NULL!	#NULL!	-100.561	-65.775	-242.337	-467.956	#NULL!	#NULL!	555.462	-512.344	-138.585	285.903	#NULL!	#NULL!	#NULL!	#NULL!	248.121	386.839	#NULL!	#NULL!	-340.982	564.799
-148.01	101.922	149.953	-309.678	#NULL!	#NULL!	330.102	97.6757	#NULL!	#NULL!	#NULL!	#NULL!	21.2076	0.74378	399.384	-541.29	#NULL!	#NULL!	89.3263	68.4436	#NULL!	#NULL!	#NULL!	#NULL!	#NULL!	#NULL!	-608.715	264.024	#NULL!	#NULL!	-129.416	-65.6891	-245.552	-469.304	#NULL!	#NULL!	508.595	-513.411	-97.5378	294.411	#NULL!	#NULL!	#NULL!	#NULL!	249.358	390.319	#NULL!	#NULL!	-344.7	564.825
-152.927	101.941	145.034	-309.658	#NULL!	#NULL!	325.186	97.6954	#NULL!	#NULL!	#NULL!	#NULL!	-70.5771	2.46298	531.232	-539.659	#NULL!	#NULL!	53.6139	72.1783	#NULL!	#NULL!	#NULL!	#NULL!	#NULL!	#NULL!	-603.003	265.705	#NULL!	#NULL!	-88.2631	-63.7823	-268.012	-467.905	#NULL!	#NULL!	504.895	-513.404	-141.009	306.786	#NULL!	#NULL!	#NULL!	#NULL!	337.998	396.12	#NULL!	#NULL!	-326.095	567.399
-157.843	101.961	105.682	-309.5	#NULL!	#NULL!	320.279	100.046	#NULL!	#NULL!	#NULL!	#NULL!	-66.2587	3.61155	514.599	-539.568	#NULL!	#NULL!	99.2135	74.2559	#NULL!	#NULL!	#NULL!	#NULL!	#NULL!	#NULL!	-512.061	267.556	#NULL!	#NULL!	-92.0035	-63.7712	-271.227	-469.253	#NULL!	#NULL!	604.798	-510.122	-101.601	316.067	#NULL!	#NULL!	#NULL!	#NULL!	334.305	396.12	#NULL!	#NULL!	-318.648	569.278
-173.816	103.191	140.129	-306.914	#NULL!	#NULL!	268.657	100.253	#NULL!	#NULL!	#NULL!	#NULL!	-74.8833	3.66276	484.413	-539.404	#NULL!	#NULL!	94.2851	74.2852	#NULL!	#NULL!	#NULL!	#NULL!	#NULL!	#NULL!	-608.343	267.747	#NULL!	#NULL!	-96.8126	-63.7569	-279.781	-468.22	#NULL!	#NULL!	599.865	-510.112	-102.776	346.232	#NULL!	#NULL!	#NULL!	#NULL!	265.371	396.12	#NULL!	#NULL!	-333.518	569.768
-178.728	104.376	133.978	-307.279	#NULL!	#NULL!	251.449	100.322	#NULL!	#NULL!	#NULL!	#NULL!	-83.5019	4.88814	395.703	-538.921	#NULL!	#NULL!	68.4173	75.613	#NULL!	#NULL!	#NULL!	#NULL!	#NULL!	#NULL!	-611.552	267.753	#NULL!	#NULL!	-98.9414	-61.7213	-285.13	-468.21	#NULL!	#NULL!	594.932	-510.103	-155.688	356.674	#NULL!	#NULL!	#NULL!	#NULL!	245.676	396.12	#NULL!	#NULL!	-340.956	569.434
-182.42	103.225	167.194	-305.077	#NULL!	#NULL!	247.147	100.339	#NULL!	#NULL!	#NULL!	#NULL!	-98.287	4.97593	525.089	-536.884	#NULL!	#NULL!	55.4864	76.864	#NULL!	#NULL!	#NULL!	#NULL!	#NULL!	#NULL!	-515.252	271.963	#NULL!	#NULL!	-130.468	-61.6275	-158.884	-466.091	#NULL!	#NULL!	580.133	-510.074	-105.15	393.8	#NULL!	#NULL!	#NULL!	#NULL!	249.373	398.44	#NULL!	#NULL!	-344.674	569.46
-146.761	106.58	162.275	-305.057	#NULL!	#NULL!	242.84	99.1908	#NULL!	#NULL!	#NULL!	#NULL!	-102.599	5.00154	518.926	-537.242	#NULL!	#NULL!	96.7757	79.3587	#NULL!	#NULL!	#NULL!	#NULL!	#NULL!	#NULL!	-614.745	271.822	#NULL!	#NULL!	-138.482	-61.6036	-164.234	-466.419	#NULL!	#NULL!	575.199	-510.064	-110.074	393.8	#NULL!	#NULL!	#NULL!	#NULL!	333.08	399.601	#NULL!	#NULL!	-322.36	570.463
-151.678	106.599	157.356	-305.037	#NULL!	#NULL!	328.893	102.344	#NULL!	#NULL!	#NULL!	#NULL!	-106.918	3.85297	488.126	-536.683	#NULL!	#NULL!	93.0713	77.8151	#NULL!	#NULL!	#NULL!	#NULL!	#NULL!	#NULL!	-617.954	271.829	#NULL!	#NULL!	-88.2462	-59.7239	-178.142	-466.391	#NULL!	#NULL!	570.266	-510.055	-156.849	394.187	#NULL!	#NULL!	#NULL!	#NULL!	265.378	399.601	#NULL!	#NULL!	-333.492	574.404
-156.594	106.619	152.437	-305.018	#NULL!	#NULL!	323.976	102.363	#NULL!	#NULL!	#NULL!	#NULL!	-121.703	3.94076	417.895	-536.692	#NULL!	#NULL!	68.4478	81.4839	#NULL!	#NULL!	#NULL!	#NULL!	#NULL!	#NULL!	-516.306	275.689	#NULL!	#NULL!	-91.9865	-59.7128	-185.631	-466.376	#NULL!	#NULL!	550.534	-510.016	-160.545	392.64	#NULL!	#NULL!	#NULL!	#NULL!	328.163	403.081	#NULL!	#NULL!	-339.691	574.061
-161.511	106.639	147.518	-304.998	#NULL!	#NULL!	273.583	102.565	#NULL!	#NULL!	#NULL!	#NULL!	-16.9567	6.84145	404.342	-536.618	#NULL!	#NULL!	97.2108	84.0529	#NULL!	#NULL!	#NULL!	#NULL!	#NULL!	#NULL!	-518.45	274.678	#NULL!	#NULL!	-122.448	-60.6367	-197.933	-466.352	#NULL!	#NULL!	545.601	-510.007	-114.172	396.507	#NULL!	#NULL!	#NULL!	#NULL!	250.611	401.921	#NULL!	#NULL!	-342.176	572.92
-165.188	108.985	127.842	-304.919	#NULL!	#NULL!	317.841	104.719	#NULL!	#NULL!	#NULL!	#NULL!	-29.2837	5.74043	399.414	-536.591	#NULL!	#NULL!	93.0957	82.5118	#NULL!	#NULL!	#NULL!	#NULL!	#NULL!	#NULL!	-617.941	274.876	#NULL!	#NULL!	-127.787	-59.6062	-248.747	-465.912	#NULL!	#NULL!	541.284	-509.998	-106.375	397.28	#NULL!	#NULL!	#NULL!	#NULL!	250.621	407.722	#NULL!	#NULL!	-321.088	576.249
-182.395	109.054	105.092	-304.828	#NULL!	#NULL!	313.539	104.737	#NULL!	#NULL!	#NULL!	#NULL!	-32.98	5.76237	514.005	-536.041	#NULL!	#NULL!	56.133	82.7312	#NULL!	#NULL!	#NULL!	#NULL!	#NULL!	#NULL!	-582.09	277.851	#NULL!	#NULL!	-134.199	-59.5871	-254.098	-466.24	#NULL!	#NULL!	528.336	-509.587	-154.382	397.28	#NULL!	#NULL!	#NULL!	#NULL!	344.182	412.363	#NULL!	#NULL!	-326.039	577.442
-186.083	109.069	142.611	-302.643	#NULL!	#NULL!	268.671	103.75	#NULL!	#NULL!	#NULL!	#NULL!	-39.1405	5.79895	482.594	-534.695	#NULL!	#NULL!	68.4661	85.0064	#NULL!	#NULL!	#NULL!	#NULL!	#NULL!	#NULL!	-519.481	283.821	#NULL!	#NULL!	-118.159	-57.2674	-258.377	-466.232	#NULL!	#NULL!	522.168	-509.961	-159.306	397.28	#NULL!	#NULL!	#NULL!	#NULL!	250.014	412.363	#NULL!	#NULL!	-330.99	578.636
-151.663	110.097	137.686	-303.791	#NULL!	#NULL!	253.929	105.364	#NULL!	#NULL!	#NULL!	#NULL!	-78.5674	6.03306	395.732	-534.222	#NULL!	#NULL!	101.751	88.3314	#NULL!	#NULL!	#NULL!	#NULL!	#NULL!	#NULL!	-630.189	288.103	#NULL!	#NULL!	-86.0919	-55.6718	-260.521	-467.243	#NULL!	#NULL!	513.947	-509.559	-116.827	403.081	#NULL!	#NULL!	#NULL!	#NULL!	250.638	417.003	#NULL!	#NULL!	-339.665	578.697
-156.575	111.282	131.544	-302.599	#NULL!	#NULL!	248.396	104.997	#NULL!	#NULL!	#NULL!	#NULL!	-93.3444	7.68641	521.42	-532.557	#NULL!	#NULL!	98.0546	88.3534	#NULL!	#NULL!	#NULL!	#NULL!	#NULL!	#NULL!	-596.473	292.099	#NULL!	#NULL!	-128.839	-55.5446	-274.959	-466.199	#NULL!	#NULL!	614.669	-507.823	-116.203	407.722	#NULL!	#NULL!	#NULL!	#NULL!	253.109	421.644	#NULL!	#NULL!	-344.002	578.727
-161.491	111.302	123.757	-302.178	#NULL!	#NULL!	327.683	107.011	#NULL!	#NULL!	#NULL!	#NULL!	-126.613	7.49255	517.107	-532.533	#NULL!	#NULL!	111.632	92.9696	#NULL!	#NULL!	#NULL!	#NULL!	#NULL!	#NULL!	-630.707	292.167	#NULL!	#NULL!	-112.805	-54.5777	-201.134	-464.314	#NULL!	#NULL!	608.503	-507.811	-114.963	412.363	#NULL!	#NULL!	#NULL!	#NULL!	254.346	425.125	#NULL!	#NULL!	-321.068	579.725
-165.783	113.65	165.989	-300.402	#NULL!	#NULL!	322.767	107.031	#NULL!	#NULL!	#NULL!	#NULL!	-131.541	7.52181	486.921	-532.369	#NULL!	#NULL!	100.543	93.0354	#NULL!	#NULL!	#NULL!	#NULL!	#NULL!	#NULL!	-599.139	294.135	#NULL!	#NULL!	-120.281	-53.5408	-238.042	-464.241	#NULL!	#NULL!	590.004	-507.389	-111.251	422.804	#NULL!	#NULL!	#NULL!	#NULL!	250.653	425.125	#NULL!	#NULL!	-335.314	580.984
-187.292	113.737	161.07	-300.382	#NULL!	#NULL!	317.862	109.771	#NULL!	#NULL!	#NULL!	#NULL!	-134.012	6.36227	404.371	-531.919	#NULL!	#NULL!	109.192	97.6809	#NULL!	#NULL!	#NULL!	#NULL!	#NULL!	#NULL!	-633.373	294.203	#NULL!	#NULL!	-124.56	-54.5427	-241.786	-464.233	#NULL!	#NULL!	583.837	-507.763	-173.989	444.848	#NULL!	#NULL!	#NULL!	#NULL!	334.371	432.086	#NULL!	#NULL!	-330.963	583.271
-156.555	115.945	156.151	-300.363	#NULL!	#NULL!	311.715	109.407	#NULL!	#NULL!	#NULL!	#NULL!	-44.0566	8.17657	399.443	-531.892	#NULL!	#NULL!	74.0897	100.238	#NULL!	#NULL!	#NULL!	#NULL!	#NULL!	#NULL!	-598.591	297.181	#NULL!	#NULL!	-115.455	-49.4967	-267.462	-464.182	#NULL!	#NULL!	565.339	-507.341	-121.857	456.837	#NULL!	#NULL!	#NULL!	#NULL!	275.292	435.566	#NULL!	#NULL!	-342.737	583.354
-161.471	115.965	151.232	-300.343	#NULL!	#NULL!	309.252	108.251	#NULL!	#NULL!	#NULL!	#NULL!	-66.2343	8.30825	479.543	-529.979	#NULL!	#NULL!	106.752	102.392	#NULL!	#NULL!	#NULL!	#NULL!	#NULL!	#NULL!	-635.495	298.27	#NULL!	#NULL!	-119.2	-50.5002	-287.253	-464.143	#NULL!	#NULL!	559.172	-507.715	-116.104	461.091	#NULL!	#NULL!	#NULL!	#NULL!	269.161	448.329	#NULL!	#NULL!	-347.694	583.389
-192.204	114.922	146.313	-300.323	#NULL!	#NULL!	261.321	109.609	#NULL!	#NULL!	#NULL!	#NULL!	-69.9306	8.3302	475.847	-529.959	#NULL!	#NULL!	103.684	104.759	#NULL!	#NULL!	#NULL!	#NULL!	#NULL!	#NULL!	-638.157	301.322	#NULL!	#NULL!	-75.0135	-47.2496	-156.729	-462.371	#NULL!	#NULL!	554.239	-507.706	-121.03	459.93	#NULL!	#NULL!	#NULL!	#NULL!	279.023	456.45	#NULL!	#NULL!	-335.908	585.624
-59.4505	116.722	105.731	-300.16	#NULL!	#NULL!	256.405	109.628	#NULL!	#NULL!	#NULL!	#NULL!	-87.1738	9.60679	395.761	-529.523	#NULL!	#NULL!	72.882	104.942	#NULL!	#NULL!	#NULL!	#NULL!	#NULL!	#NULL!	-601.771	304.297	#NULL!	#NULL!	-78.5814	-48.5918	-160.473	-462.364	#NULL!	#NULL!	535.74	-507.283	-176.389	478.493	#NULL!	#NULL!	#NULL!	#NULL!	275.328	455.29	#NULL!	#NULL!	-329.698	587.898
-166.376	118.704	140.999	-297.578	#NULL!	#NULL!	251.484	108.482	#NULL!	#NULL!	#NULL!	#NULL!	-99.4947	9.67995	516.52	-527.831	#NULL!	#NULL!	68.5758	106.142	#NULL!	#NULL!	#NULL!	#NULL!	#NULL!	#NULL!	-543.964	313.322	#NULL!	#NULL!	-110.103	-47.4834	-165.287	-462.354	#NULL!	#NULL!	602.339	-506.64	-130.187	500.537	#NULL!	#NULL!	#NULL!	#NULL!	276.57	461.091	#NULL!	#NULL!	-341.472	587.981
-158.993	120.618	130.339	-297.924	#NULL!	#NULL!	246.567	108.502	#NULL!	#NULL!	#NULL!	#NULL!	-8.92374	11.4906	502.351	-527.754	#NULL!	#NULL!	121.574	109.35	#NULL!	#NULL!	#NULL!	#NULL!	#NULL!	#NULL!	-617.224	318.546	#NULL!	#NULL!	-70.5451	-43.5426	-171.705	-462.003	#NULL!	#NULL!	597.408	-505.472	-130.796	504.017	#NULL!	#NULL!	#NULL!	#NULL!	352.898	465.731	#NULL!	#NULL!	-323.488	590.173
-163.9	122.969	125.42	-297.904	#NULL!	#NULL!	325.24	110.519	#NULL!	#NULL!	#NULL!	#NULL!	-17.5484	11.5418	404.401	-527.22	#NULL!	#NULL!	104.325	109.452	#NULL!	#NULL!	#NULL!	#NULL!	#NULL!	#NULL!	-618.816	321.596	#NULL!	#NULL!	-74.8199	-43.5299	-175.989	-463.348	#NULL!	#NULL!	577.676	-505.433	-178.763	526.061	#NULL!	#NULL!	#NULL!	#NULL!	357.826	468.052	#NULL!	#NULL!	-337.121	590.268
-168.816	122.989	120.501	-297.885	#NULL!	#NULL!	320.338	114.035	#NULL!	#NULL!	#NULL!	#NULL!	-23.0928	11.5747	399.472	-527.193	#NULL!	#NULL!	72.2843	108.468	#NULL!	#NULL!	#NULL!	#NULL!	#NULL!	#NULL!	-555.124	330.61	#NULL!	#NULL!	-108.483	-43.4297	-184.009	-462.317	#NULL!	#NULL!	572.742	-505.424	-182.456	526.061	#NULL!	#NULL!	#NULL!	#NULL!	278.429	468.052	#NULL!	#NULL!	-328.433	592.525
-173.733	123.008	162.324	-295.717	#NULL!	#NULL!	315.422	114.055	#NULL!	#NULL!	#NULL!	#NULL!	-34.7977	11.6442	477.724	-525.27	#NULL!	#NULL!	119.122	111.713	#NULL!	#NULL!	#NULL!	#NULL!	#NULL!	#NULL!	-559.215	332.988	#NULL!	#NULL!	-62.5173	-40.5227	-197.381	-462.29	#NULL!	#NULL!	548.077	-505.376	-123.977	530.702	#NULL!	#NULL!	#NULL!	#NULL!	277.82	471.532	#NULL!	#NULL!	-343.305	592.629
-160.203	125.286	157.405	-295.697	#NULL!	#NULL!	311.734	114.07	#NULL!	#NULL!	#NULL!	#NULL!	-48.9728	10.5542	394.558	-524.817	#NULL!	#NULL!	105.575	112.967	#NULL!	#NULL!	#NULL!	#NULL!	#NULL!	#NULL!	-666.902	334.895	#NULL!	#NULL!	-67.8565	-39.4922	-246.596	-463.208	#NULL!	#NULL!	543.144	-505.366	-188.589	537.663	#NULL!	#NULL!	#NULL!	#NULL!	393.568	492.416	#NULL!	#NULL!	-333.375	595.264
-166.337	128.03	152.486	-295.678	#NULL!	#NULL!	266.257	114.252	#NULL!	#NULL!	#NULL!	#NULL!	-53.9012	10.5834	390.246	-524.793	#NULL!	#NULL!	78.4813	115.477	#NULL!	#NULL!	#NULL!	#NULL!	#NULL!	#NULL!	-560.983	336.716	#NULL!	#NULL!	-71.0667	-40.4972	-250.875	-463.2	#NULL!	#NULL!	528.345	-505.337	-189.811	542.303	#NULL!	#NULL!	#NULL!	#NULL!	373.264	495.896	#NULL!	#NULL!	-339.574	594.921
-172.484	127.666	147.567	-295.658	#NULL!	#NULL!	261.341	114.272	#NULL!	#NULL!	#NULL!	#NULL!	-58.8296	10.6127	512.854	-523.112	#NULL!	#NULL!	63.7023	116.738	#NULL!	#NULL!	#NULL!	#NULL!	#NULL!	#NULL!	-669.024	338.962	#NULL!	#NULL!	-100.986	-39.3936	-255.15	-462.176	#NULL!	#NULL!	523.411	-505.328	-192.275	541.143	#NULL!	#NULL!	#NULL!	#NULL!	292.026	498.216	#NULL!	#NULL!	-333.351	599.513
[truncated: 2,255 more rows]
[truncated: 10 more columns]
